# Supplementary material for: Combined molecular dynamics and coordinate driving method for automatically searching complicated reaction pathways
Source: Royal Society of Chemistry journal article supplement (doi:10.1039/d3cp02443a), 2023-01-01
Supplement: d3cp02443a1.pdf [file d3cp02443a1.pdf]

**Supplementary Information for**  
**Combined Molecular Dynamics and Coordinate Driving Method for Automatically**  
**Searching Complicated Reaction Pathways**

Guoao Li, Zhenxing Li, Liuzhou Gao, Shengda Chen, Guoqiang Wang\*, Shuhua Li\*

*School of Chemistry and Chemical Engineering, Key Laboratory of Mesoscopic  
Chemistry of Ministry of Education, Institute of Theoretical and Computational  
Chemistry, Nanjing University, Nanjing, 210023, P. R. China.*

E-mail: [shuhua@nju.edu.cn](mailto:shuhua@nju.edu.cn); [wangguoqiang710@nju.edu.cn](mailto:wangguoqiang710@nju.edu.cn)

Tel: +86-25-89686465

## Table of Contents

|                                                                                                                                |     |
|--------------------------------------------------------------------------------------------------------------------------------|-----|
| 1. Evaluation of activation barriers for single electron transfer processes .....                                              | 3   |
| The Marcus Theory .....                                                                                                        | 3   |
| The solvation reorganization energy .....                                                                                      | 4   |
| The Wolynes Theory .....                                                                                                       | 4   |
| Calculation procedure of the activation barriers of SET processes .....                                                        | 5   |
| 2. Details of the improved CD procedure .....                                                                                  | 7   |
| 3. Reaction pathways for the Organocatalytic trans phosphinoboration reaction .....                                            | 9   |
| 4. Reaction pathways for the phosphine-catalyzed hydroboration reaction .....                                                  | 15  |
| 5. Reaction pathways for the Fe(II) complex mediated C-H borylation reaction .....                                             | 17  |
| 6. Reaction pathways for the SET-triggered deaminative cross-coupling reaction .....                                           | 19  |
| 7. Optimized structures of local minima and transition states along main reaction pathways                                     | 20  |
| 8. References .....                                                                                                            | 24  |
| 9. DFT-optimized cartesian coordinates of all species involved in the organocatalytic trans phosphinoboration reaction .....   | 25  |
| 10. DFT-optimized cartesian coordinates of all species involved in the phosphine-catalyzed hydroboration reaction .....        | 211 |
| 11. DFT-optimized cartesian coordinates of all species involved in the Fe(II) complex mediated C-H borylation reaction .....   | 247 |
| 12. DFT-optimized cartesian coordinates of all species involved in the SET-triggered deaminative cross-coupling reaction ..... | 268 |

## 1. Evaluation of free energy barriers and reaction rate constants for single electron transfer processes.

### The Marcus theory

Single electron transfer (SET) processes can be described as  $[D] + [A] \rightarrow [D^+] + [A^-]$ , where  $[D]$ ,  $[A]$  are the electron donor and acceptor respectively, and  $[D^+]$ ,  $[A^-]$  are electron-transferred species. To evaluate the free energy barrier  $\Delta G^\ddagger$  for a SET process, the Marcus theory<sup>1,2</sup> makes the following assumptions:

(a) The entropy exchange of the SET process is ignored. As a result, the free energies can be replaced by potential energies.

(b) The free energy surfaces  $V_R$  of  $[D A]$  and  $V_P$  of  $[D^+ A^-]$  are parabolas of the same shape.

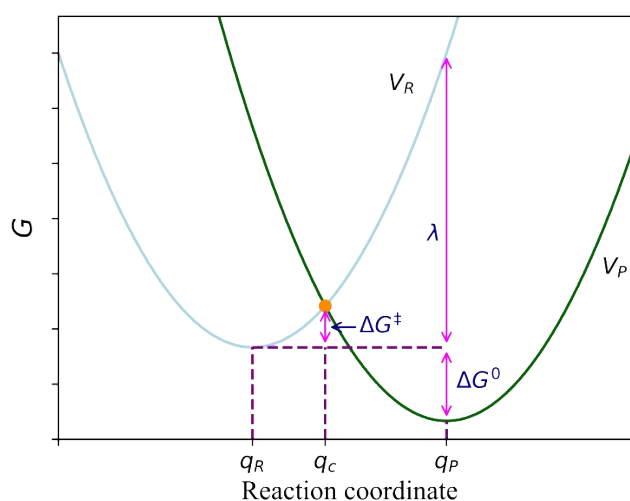

**Fig. S1** Schematic diagram of the Marcus theory.

The schematic diagram of the Marcus theory is shown in **Figure S1**. Along the reaction coordinate of a certain SET process, the positions of local minima of  $V_R$  and  $V_P$  can be denoted as  $q_R$  and  $q_P$ . Then the Gibbs free energy change can be expressed as Eq. (S1).

$$\Delta G^0 = V_P(q_P) - V_R(q_R) \quad (\text{S1})$$

Supposing that  $V_R(q_R)$  is zero. Then the expressions of parabola  $V_R$  and  $V_P$  can be written as:

$$V_R(q) = \frac{1}{2}f(q - q_R)^2 \quad (\text{S2})$$

$$V_P(q) = \frac{1}{2}f(q - q_P)^2 + \Delta G^0 \quad (\text{S3})$$

At the crossing point  $q_c$ , we have  $V_R(q_c) = V_P(q_c)$ , leading to Eq. (S4).

$$\frac{1}{2}f(q_c - q_R)^2 = \frac{1}{2}f(q_c - q_P)^2 + \Delta G^0 \quad (\text{S4})$$

Solving this equation, we obtain

$$q_c = \frac{\Delta G^0}{q_P - q_R} + \frac{q_P + q_R}{2} \quad (\text{S5})$$

As in Eq. (S6), the reorganization energy ( $\lambda$ ) is defined as the change in Gibbs free energy if the reactant state  $[D A]$  distorts to the equilibrium conformation of the product state  $[D^+ A^-]$  without transfer of an electron.

$$\lambda = V_R(q_P) - V_R(q_R) = \frac{1}{2}f(q_P - q_R)^2 \quad (\text{S6})$$

Thus, the free energy barrier  $\Delta G^\ddagger$  can be expressed as Eq. (S7), which is exactly Eq. (1) in the main text of the manuscript.

$$\Delta G^\ddagger = \frac{1}{2}f(q_c - q_R)^2 = \frac{(\lambda + \Delta G^0)^2}{4\lambda} = \frac{\lambda}{4}\left(1 + \frac{\Delta G^0}{\lambda}\right)^2 \quad (\text{S7})$$

### The solvation reorganization energy

In more realistic situations, the reorganization energy  $\lambda$  should be divided into the vibrational (inner-sphere) part  $\lambda_i$  and the solvation (outer-sphere) part  $\lambda_o$ .  $\lambda_i$  represents the distortion of  $[D A]$ , which can be estimated with Eq. (S6), while  $\lambda_o$  represents the distortion of the solvents. According to the Marcus equation,  $\lambda_o$  can be calculated with Eq. (S8),

$$\lambda_o = \frac{e^2}{4\pi\epsilon_0} \left( \frac{1}{2r_D} + \frac{1}{2r_A} - \frac{1}{R} \right) \left( \frac{1}{\epsilon_{op,r}} - \frac{1}{\epsilon_{s,r}} \right) \quad (\text{S8})$$

where  $e$  is the elementary charge,  $\epsilon_0$  is the permittivity of vacuum,  $\epsilon_{op,r}$  and  $\epsilon_{s,r}$  are relative optical and static dielectric constants of the solvent,  $r_D$ ,  $r_A$  and  $R$  are the radii of the donor  $[D]$ , the acceptor  $[A]$  and the donor-acceptor complex  $[D A]$ . For the solvent acetonitrile, we refer to  $\epsilon_{s,r} = 35.688$  and  $\epsilon_{op,r} = 1.806874$ . For the solvent DMSO, we refer to  $\epsilon_{s,r} = 46.826$  and  $\epsilon_{op,r} = 2.007889$ . These data are obtained from the output results of the Gaussian 16 software package.<sup>3</sup> The total reorganization energy  $\lambda$  used in Eq. (S7) in this work is the summation of  $\lambda_i$  and  $\lambda_o$ .

$$\lambda = \lambda_i + \lambda_o \quad (\text{S9})$$

### The Wolynes theory

Traditional Marcus theory gives the electron transfer rate constants as Eq. (S10),

$$k_{MT} = \frac{\Delta^2}{\hbar} \sqrt{\frac{\pi}{k_B T \lambda}} \exp\left(-\frac{\Delta G^\ddagger}{k_B T}\right) \quad (\text{S10})$$

where  $\Delta$  is the electronic coupling,  $\hbar$  is the reduced Planck's constant,  $k_B$  is the Boltzmann constant and  $T$  is the temperature. However, in the Marcus inverted regime ( $\lambda < -\Delta G^0$ ), the SET rate could be significantly enhanced by nuclear quantum effects, introducing a correction factor  $r$  to the Marcus rate  $k_{MT}$ . The correction factor  $r$  can be evaluated by the analytic continuation version of the Wolynes theory.<sup>4</sup>

First, based on the harmonic oscillator approximation, the total reorganization energy  $\lambda$  can be

decomposed into the contribution of each vibrational modes of the donor-acceptor complex  $[D A]$ .

$$\lambda = \sum_{j=1}^f \lambda_j, \quad \lambda_j = \mu_j \omega_j^2 d_j^2 \quad (\text{S11})$$

In Eq. (S11),  $f$  is the total number of vibrational modes, and  $\mu_j$ ,  $\omega_j$ ,  $d_j$  are the reduced mass, harmonic vibrational frequencies, geometry displacements between  $[D A]$  and  $[D^+ A^-]$  for the vibrational mode  $j$ . Since Gaussian 16 can provide Huang-Rhys factors  $S_j$  using the local minimum structures of  $[D A]$  and  $[D^+ A^-]$ ,  $\lambda_j$  can be directly derived with Eq. (S12) instead of computing  $d_j$ ,

$$\lambda_j = 2\pi\hbar\omega_j S_j \quad (\text{S12})$$

Then, the rate constant predicted by the Wolynes theory can be written as Eq. (S13),

$$k_W = \frac{\Delta^2}{\hbar} \sqrt{\frac{2\pi k_B T}{F''(x)|_{x=x_{sp}}}} \exp\left(-\frac{F(x)|_{x=x_{sp}}}{k_B T}\right) \quad (\text{S13})$$

where  $F(x)$  is in the free energy form with  $x$  as the hypothesized reaction coordinate, and  $x_{sp}$  is the saddle point of  $F(x)$ . Using Eq. (S12), the formula of  $F(x)$  is given as follows:

$$F(x) = \left(\frac{1}{2} + k_B T x\right) \Delta G^0 + \sum_{j=1}^f 2\pi S_j k_B T \frac{\cosh\left(\frac{\hbar\omega_j}{2k_B T}\right) - \cosh(x\hbar\omega_j)}{\sinh\left(\frac{\hbar\omega_j}{2k_B T}\right)} \quad (\text{S14})$$

At the saddle point  $x = x_{sp}$ , we have

$$F'(x)|_{x=x_{sp}} = k_B T \Delta G^0 - \sum_{j=1}^f 2\pi S_j k_B T \cdot \hbar\omega_j \frac{\sinh(x_{sp}\hbar\omega_j)}{\sinh\left(\frac{\hbar\omega_j}{2k_B T}\right)} = 0 \quad (\text{S15})$$

and

$$F''(x)|_{x=x_{sp}} = - \sum_{j=1}^f 2\pi S_j k_B T \cdot \hbar^2 \omega_j^2 \frac{\cosh(x_{sp}\hbar\omega_j)}{\sinh\left(\frac{\hbar\omega_j}{2k_B T}\right)} \quad (\text{S16})$$

Since  $F'(x)$  is monotonous, Eq. (S15) can be solved easily using the bisection method. Finally, the correction ratio  $r$  to the Marcus rate  $k_{MT}$  can be evaluated as Eq. (S17) with the quantities obtained above:

$$r = \frac{k_W}{k_{MT}} = k_B T \sqrt{\frac{2\lambda}{F''(x)|_{x=x_{sp}}}} \exp\left(\frac{\Delta G^\ddagger - F(x)|_{x=x_{sp}}}{k_B T}\right) \quad (\text{S17})$$

### Calculation procedure of the activation barriers of SET processes

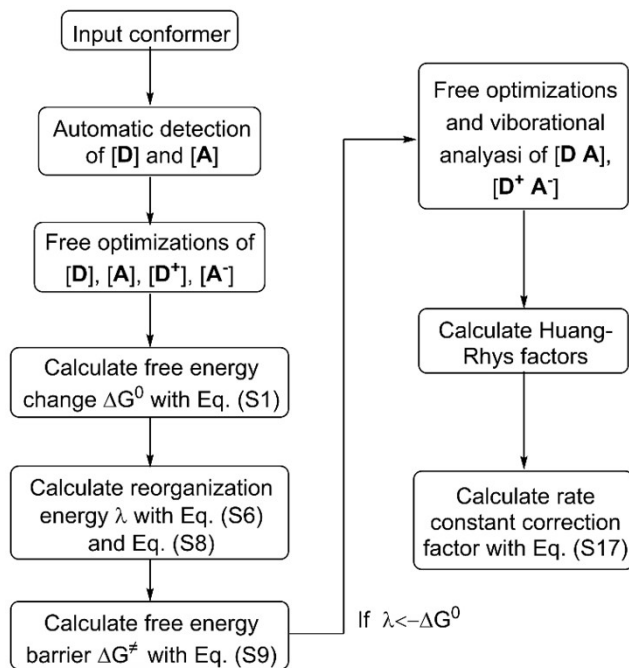

**Fig. S2** Flowchart of the calculation procedure of SET processes.

The calculation flowchart of the barriers of SET processes is shown in **Figure S2**. For a given conformer, the electron donor  $[D]$  and acceptor  $[A]$  are detected with the following steps. First, the conformer is divided into single molecules based on the bonding relationships. If the relative distance  $\lambda_{ij}$  between atom  $i$  and  $j$  is less than 1.25, atom  $i$  and  $j$  are considered to be connected with a chemical bond. Regarding the conformer as an undirected graph with atoms as its vertices and bonds as its edges, the single molecules are exactly the connected components of the graph.

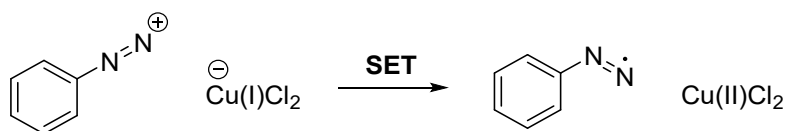

**Scheme S1.** The SET process in the **CuCl** catalyzed Sandmeyer reaction of **PhN<sub>2</sub>Cl**.

For example, consider the outer-sphere SET process in the traditional Sandmeyer reaction<sup>4</sup> of **PhN<sub>2</sub>Cl** (**Scheme S1**). An electron is about to transfer from the **Cu(I)Cl<sub>2</sub>** anion to the phenyl diazo cation. We divide the encounter complex into two single molecules **SM(a)** (**PhN<sub>2</sub><sup>+</sup>**) and **SM(b)** (**Cu(I)Cl<sub>2</sub><sup>-</sup>**) via bonding connections as shown in **Figure S3**. Since the donor will have a higher HOMO energy, while the acceptor will have a lower LUMO energy, **SM(b)** is automatically detected as the electron donor  $[D]$  and **SM(a)** as the electron acceptor  $[A]$ .

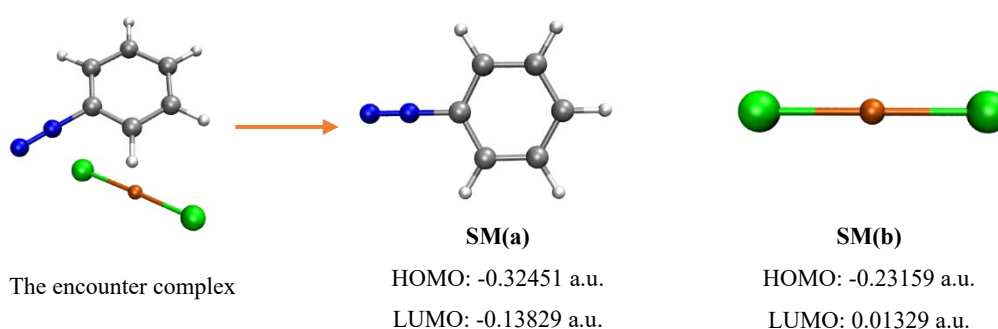

**Fig. S3.** Schematic diagram of dividing an encounter complex into two separate reactants. Frontier orbital energies are calculated at the PBE0-D3/def-TZVP level with the PCM model (MeCN as the solvent).

Then free optimizations of  $[D]$ ,  $[A]$  and their electron transferred species  $[D^+]$  and  $[A^-]$  are performed to obtain the structures at  $q_R$  and  $q_P$  described in **Figure S1**. To find the ground state spin multiplicities of  $[D^+]$  and  $[A^-]$ , odd or even numbers from 1 to the user-defined largest possible spin multiplicities are assigned to the real spin multiplicities of  $[D^+]$  and  $[A^-]$  to perform single point calculations at the initial structures. If  $[D^+]$  or  $[A^-]$  has an even number of electrons, its spin multiplicity should be an odd number, vice versa. The spin multiplicity with the lowest electronic energy is taken as the ground state spin multiplicity and will be used in the optimizations and following calculations. Finally, by applying Eq. (S1), Eq. (S6), Eq. (S7) and Eq. (S8), the free energy changes and barriers of the SET process from **SM(b)** to **SM(a)** can be evaluated. For the reactant complex **SM(a)** and **SM(b)**, the computed results at the uESE(MeCN)/RI- $\omega$ B97M-V/ma-def2-TZVPP//PCM(MeCN)/PBE0-D3/def-TZVP level are  $\lambda = 51.53$  kcal/mol,  $\Delta G^0 = 31.09$  kcal/mol and  $\Delta G^\ddagger = 33.12$  kcal/mol.

## 2. Details of the improved CD procedure

In the improved CD procedure, a reaction coordinate (RC) consists of one or several primary reaction coordinates (PRC). A PRC  $(i,j,k)$  is a tuple with three numbers. The first two numbers  $i,j$  are atom labels between which a bond change may occur. The third number  $k$  is 1 or 2, where 1 means to form a bond along this PRC and 2 means to break the bond. For a given structure, all the PRCs are generated according to the relative distance  $\lambda_{ij}$  and bond order  $L_{ij}$  between all the active atoms. The bond order  $L_{ij}$  of atom  $i$  and  $j$  is defined according to their relative distance  $\lambda_{ij}$ :

$$L_{ij} = \begin{cases} 0, & \lambda_{ij} > 1.25 \\ 1, & 0.93 < \lambda_{ij} < 1.25 \\ 2, & 0.81 < \lambda_{ij} < 0.93 \\ 3, & \lambda_{ij} < 0.81 \end{cases} \quad (\text{S10})$$

If  $L_{ij} = 0$  and  $\lambda_{ij} < 5.0$ , it is possible to form a bond between atom  $i$  and  $j$ , then the PRC  $(i,j,1)$  is generated. If  $L_{ij} > 0$  and  $\lambda_{ij} > 0.90$ , the bond between atom  $i$  and  $j$  is possible to break, then the PRC  $(i,j,2)$  is generated. We choose 12 fixed relative distance values for each PRC. The fixed values along PRC  $(i,j,1)$  are

$$F_1(1,2,\dots,12) = [4.5, 4.0, 3.5, 3.0, 2.5, 2.0, 1.5, 1.4, 1.3, 1.2, 1.1, 1.0].$$

For PRC  $(i,j,2)$ , the fixed values are

$$F_2(1,2,\dots,12) = [1.0, 1.1, 1.2, 1.3, 1.4, 1.5, 1.6, 1.7, 1.8, 1.9, 2.0, 2.15].$$

It should be mentioned that for judging the criterion  $\lambda_{ij} < 5.0$ , the radius of H atoms is doubled to avoid missing the reaction possibilities of H atoms because their radius is too small (0.30 Å).

In the first CD stage, 12 points along every RC from the starting conformer are explored to obtain the local potential energy surface. For each PRC  $(i,j,k)$  constituting the current RC, on the  $m$ th point, the relative distance  $\lambda_{ij}$  is fixed at  $F_k(m)$ . If  $k = 1$ , meaning to form a bond, but  $F_k(m)$  is greater than the initial relative distance  $\lambda_{ij}^0$  in the starting conformer,  $\lambda_{ij}$  is fixed at  $\lambda_{ij}^0$ . Similarly, if  $k = 2$  but  $F_k(m) < \lambda_{ij}^0$ ,  $\lambda_{ij}$  is also fixed at  $\lambda_{ij}^0$ .

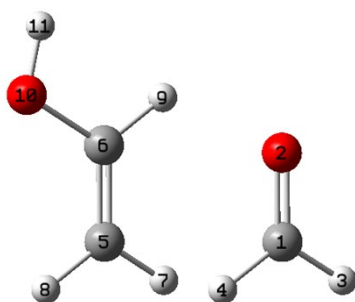

**Fig S4.** A conformer for the complex of the formaldehyde and the vinyl alcohol.

For example, as shown in **Figure S4**, we suppose to apply the traditional CD technique on the RC containing PRCs  $(1,5,1)$  and  $(2,11,1)$ , which is a typical RC for the intermolecular Aldol reaction. In the starting conformer,  $\lambda_{1,5}^0 = 2.45$ , and  $\lambda_{2,11}^0 = 4.20$ . Thus, on the 12 points along the current RC,  $\lambda_{1,5}$  and  $\lambda_{2,11}$  are fixed at  $[2.45, 2.45, 2.45, 2.45, 2.45, 2.0, 1.5, 1.4, 1.3, 1.2, 1.1, 1.0]$  and



[4.2, 4.0, 3.5, 3.0, 2.5, 2.0, 1.5, 1.4, 1.3, 1.2, 1.1, 1.0], respectively.

In the second CD stage, if we need to perform CD calculations directly with *ab initio* methods, 20 points along one RC are chosen to obtain the local potential energy surface with

$$F_{1,r} = [4.5, 4.0, 3.5, 3.0, 2.5, 2.0, 1.8, 1.6, 1.55, 1.5, 1.45, 1.4, 1.35, 1.3, 1.25, 1.2, 1.15, 1.1, 1.05, 1.0]$$

and

$$F_{2,r} = [1.0, 1.05, 1.1, 1.15, 1.2, 1.25, 1.3, 1.35, 1.4, 1.45, 1.5, 1.55, 1.6, 1.65, 1.7, 1.8, 1.9, 2.0, 2.15, 2.3]$$

The following example shows that the RC used in the constrained optimizations does not need to contain all bond-forming and bond-breaking atom pairs along the elementary reaction step. For the ring-opening 1,4-fluorine migration step shown in Scheme S2(a), concerted bond formation and breakage happens among three atom pairs. However, with the RC that contains only one B-F distance (in dotted line), the reasonable local potential energy surface can be obtained (Scheme S2(b)), and further free optimizations will lead to the desired product and transition state (Scheme S2(c)).

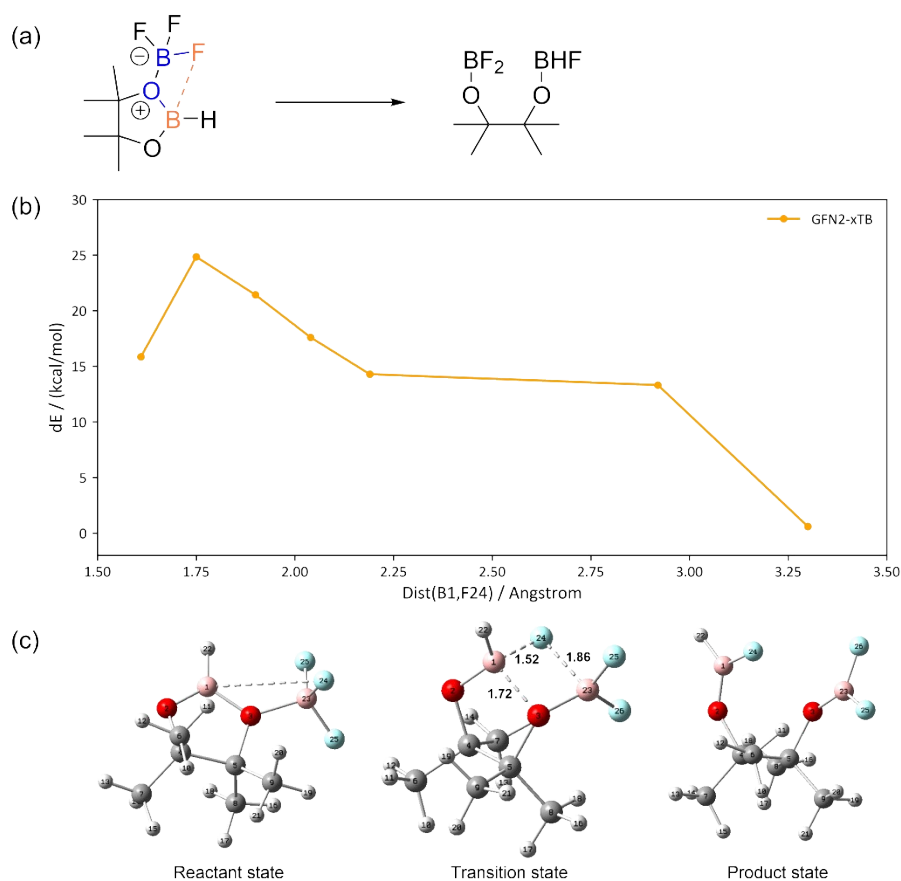

**Scheme S2.** (a) The ring-opening 1,4-fluorine migration. Atom pairs involved in bond changes are colored with orange (included in RC) and blue (not included in RC). (b) The local potential energy surface along the B-F distance (in dotted line). (c) Optimized structure of the reactant, transition state and product of this reaction step. Bond distances are in Å.

### 3. Reaction pathways for the organocatalytic *trans* phosphinoboration reaction.

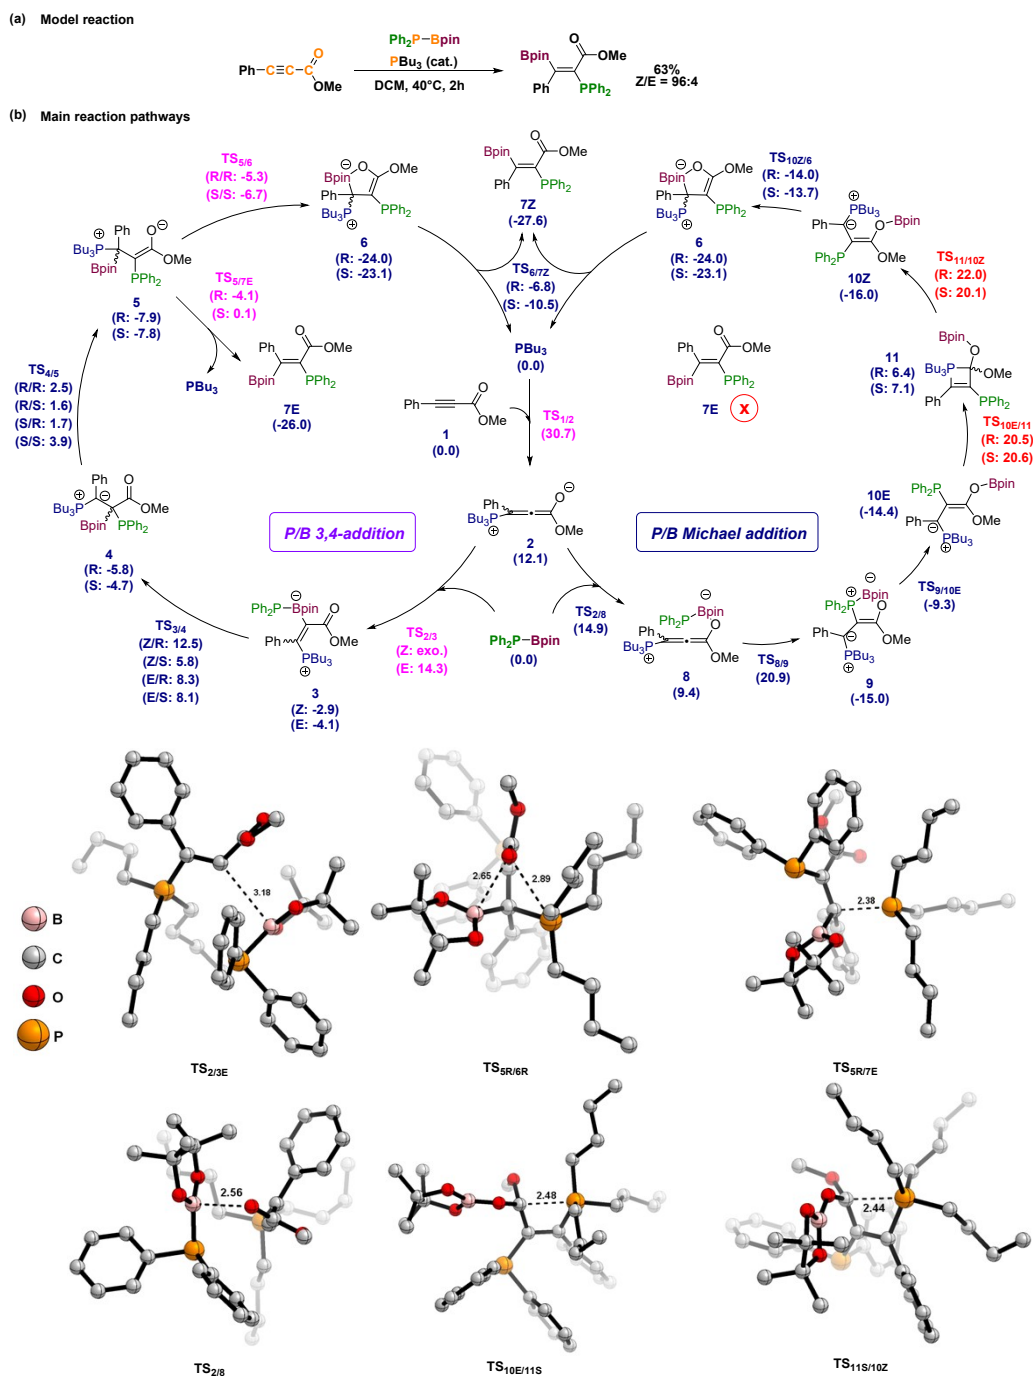

Fig S5. P/B 3,4-addition and 1,4-addition pathways for the organocatalytic *trans* phosphinoboration reaction.

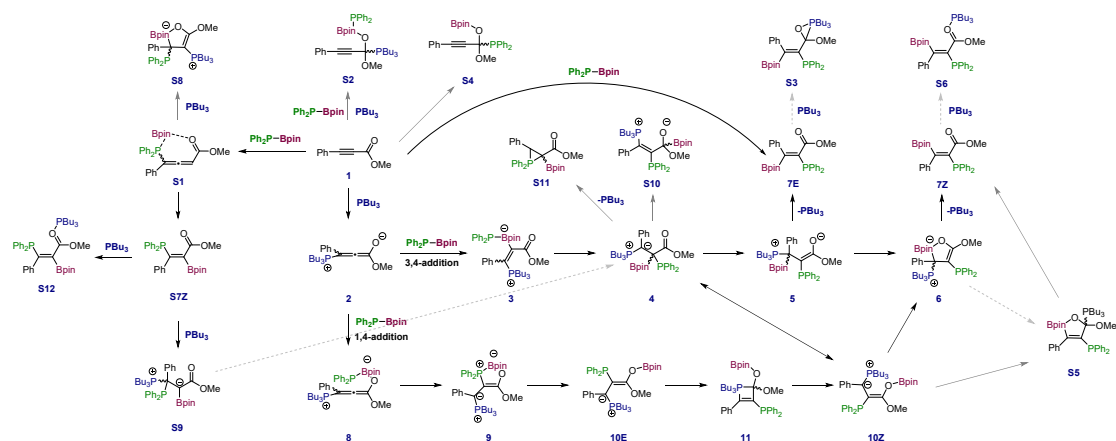

**Fig. S6.** Overall reaction pathways for the organocatalytic *trans* phosphinoboration reaction. (Black arrows: MD/CD method found all the TS structures among different stereoisomers; Brown arrows: MD/CD method found part of TS structures among different stereoisomers; Dashed arrows: Intermediates were connected during MD/CD explorations, but TS locations failed.)

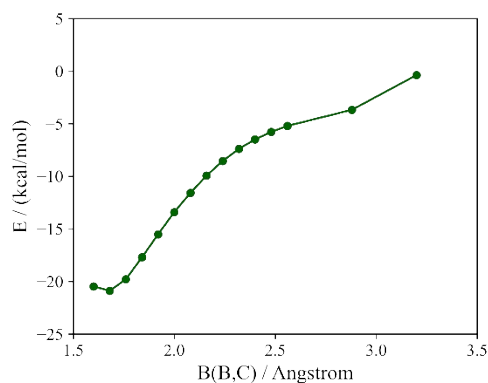

**Fig. S7.** Local potential energy surface of the coordination from **2** to **3Z** obtained in the second CD stage at the B3LYP-D3/6-31G(d) level.

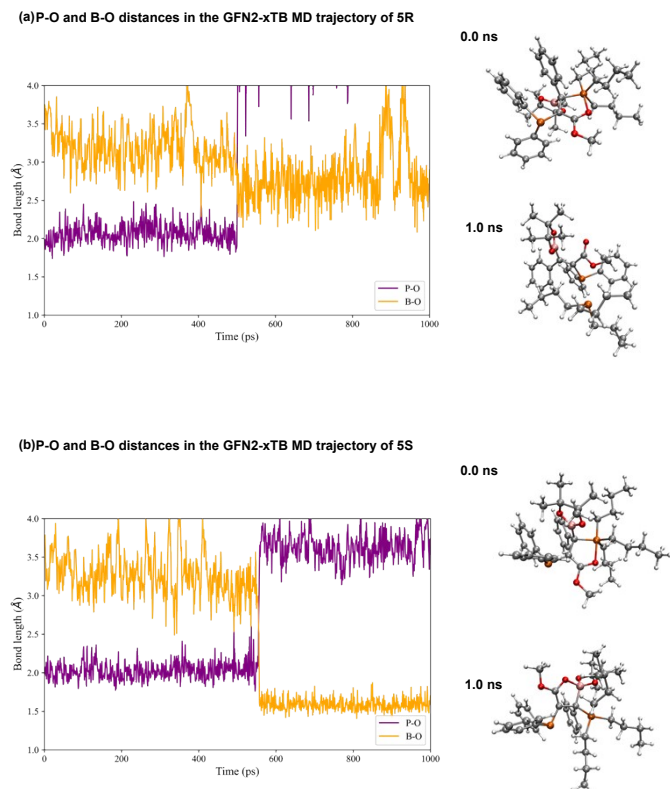

**Fig. S8.** P-O and B-O distances among the P atom from **PBu<sub>3</sub>**, the B atom from **PPh<sub>2</sub>-Bpin** and the carbonyl O atom from **1** as functions of time in the MD trajectories of (a) **5R** and (b) **5S**.

**Table S1.** B3LYP-D3/6-31G(d) computed imaginary frequency (ImF); Grimme's QRRHO approximated gas-phase Gibbs free energy corrections (Gc); the solvation free energies (Gsol) computed with the SMD model at the M05-2X/6-31G(d) level in CH<sub>2</sub>Cl<sub>2</sub> solution; the RI- $\omega$ B97M-V/def2-TZVPP single point energies (Esp); the total Gibbs free energies (G); relative electronic energies ( $\Delta E$ ) and relative Gibbs free energies ( $\Delta G$ ).

| Species                          | ImF<br>cm <sup>-1</sup> | Gc/Eh    | Gsol/Eh   | Esp/Eh       | G/Eh         | $\Delta E$<br>(kcal/mol) | $\Delta G$<br>(kcal/mol) |
|----------------------------------|-------------------------|----------|-----------|--------------|--------------|--------------------------|--------------------------|
| <b>PBu<sub>3</sub></b>           | 0                       | 0.319962 | -0.014557 | -814.792781  | -814.484364  | 0.00                     | 0.00                     |
| <b>PPh<sub>2</sub>-<br/>Bpin</b> | 0                       | 0.312950 | -0.026361 | -1215.904501 | -1215.614901 | 0.00                     | 0.00                     |
| <b>1</b>                         | 0                       | 0.114093 | -0.016473 | -536.286267  | -536.185636  | 0.00                     | 0.00                     |
| <b>2</b>                         | 0                       | 0.463120 | -0.041108 | -1351.075713 | -1350.650689 | 2.09                     | 12.12                    |
| <b>3Z</b>                        | 0                       | 0.808029 | -0.057088 | -2567.043525 | -2566.289571 | -37.63                   | -2.93                    |
| <b>3E</b>                        | 0                       | 0.809072 | -0.051622 | -2567.051968 | -2566.291506 | -42.93                   | -4.14                    |
| <b>4R</b>                        | 0                       | 0.811617 | -0.043209 | -2567.065570 | -2566.294150 | -51.47                   | -5.80                    |
| <b>4S</b>                        | 0                       | 0.812015 | -0.045396 | -2567.061991 | -2566.292360 | -49.22                   | -4.68                    |
| <b>5R</b>                        | 0                       | 0.812810 | -0.045332 | -2567.067970 | -2566.297480 | -52.97                   | -7.89                    |
| <b>5S</b>                        | 0                       | 0.812820 | -0.045117 | -2567.068106 | -2566.297391 | -53.06                   | -7.84                    |
| <b>6R</b>                        | 0                       | 0.812801 | -0.046703 | -2567.092225 | -2566.323114 | -68.19                   | -23.98                   |
| <b>7Z</b>                        | 0                       | 0.456138 | -0.035865 | -1752.267848 | -1751.844563 | -48.37                   | -27.63                   |
| <b>7E</b>                        | 0                       | 0.455801 | -0.036316 | -1752.264484 | -1751.841987 | -46.26                   | -26.01                   |

|                            |      |          |           |              |              |        |        |
|----------------------------|------|----------|-----------|--------------|--------------|--------|--------|
| <b>8</b>                   | 0    | 0.806270 | -0.051276 | -2567.027996 | -2566.269991 | -27.89 | 9.36   |
| <b>9</b>                   | 0    | 0.808726 | -0.048325 | -2567.072155 | -2566.308742 | -55.60 | -14.96 |
| <b>10Z</b>                 | 0    | 0.809776 | -0.046857 | -2567.076389 | -2566.310458 | -58.26 | -16.04 |
| <b>10E</b>                 | 0    | 0.808695 | -0.045232 | -2567.074241 | -2566.307766 | -56.91 | -14.35 |
| <b>11R</b>                 | 0    | 0.807026 | -0.043341 | -2567.041470 | -2566.274774 | -36.35 | 6.35   |
| <b>12R</b>                 | 0    | 0.808392 | -0.047633 | -2567.078090 | -2566.314319 | -59.32 | -18.46 |
| <b>12S</b>                 | 0    | 0.809915 | -0.047309 | -2567.080854 | -2566.315236 | -61.06 | -19.04 |
| <b>S1</b>                  | 0    | 0.458655 | -0.035583 | -1752.212235 | -1751.786151 | -13.47 | 9.03   |
| <b>S2R</b>                 | 0    | 0.805833 | -0.052156 | -2567.004806 | -2566.248117 | -13.34 | 23.08  |
| <b>S2S</b>                 | 0    | 0.806978 | -0.052587 | -2567.008586 | -2566.251183 | -15.71 | 21.16  |
| <b>S3</b>                  | 0    | 0.809270 | -0.045149 | -2567.017093 | -2566.249960 | -21.05 | 21.93  |
| <b>S4R</b>                 | 0    | 0.454056 | -0.037375 | -1752.225788 | -1751.806095 | -21.98 | -3.49  |
| <b>S4S</b>                 | 0    | 0.455326 | -0.034377 | -1752.231348 | -1751.807387 | -25.46 | -4.30  |
| <b>S5R</b>                 | 0    | 0.808392 | -0.047633 | -2567.078090 | -2566.314319 | -59.32 | -18.46 |
| <b>S5S</b>                 | 0    | 0.809915 | -0.047309 | -2567.080854 | -2566.315236 | -61.06 | -19.04 |
| <b>S6</b>                  | 0    | 0.805466 | -0.058495 | -2567.026827 | -2566.276844 | -27.16 | 5.06   |
| <b>S7Z</b>                 | 0    | 0.457661 | -0.036530 | -1752.269031 | -1751.844889 | -49.11 | -27.83 |
| <b>S8S</b>                 | 0    | 0.814619 | -0.045678 | -2567.091649 | -2566.319696 | -67.83 | -21.83 |
| <b>S9R</b>                 | 0    | 0.812443 | -0.044548 | -2567.064977 | -2566.294070 | -51.10 | -5.75  |
| <b>S9S</b>                 | 0    | 0.814270 | -0.046364 | -2567.057888 | -2566.286970 | -46.65 | -1.30  |
| <b>S10R</b>                | 0    | 0.811770 | -0.039177 | -2567.047303 | -2566.271698 | -40.01 | 8.28   |
| <b>S11</b>                 | 0    | 0.455938 | -0.038957 | -1752.197445 | -1751.777452 | -4.19  | 14.49  |
| <b>S12</b>                 | 0    | 0.809077 | -0.055063 | -2567.012271 | -2566.255245 | -18.02 | 18.61  |
| <b>TS<sub>1/2</sub></b>    | 138i | 0.462205 | -0.029077 | -1351.057160 | -1350.621020 | 13.74  | 30.73  |
| <b>TS<sub>2/3E</sub></b>   | 20i  | 0.807987 | -0.049718 | -2567.023459 | -2566.262179 | -25.04 | 14.26  |
| <b>TS<sub>3Z/4R</sub></b>  | 21i  | 0.809309 | -0.049348 | -2567.027962 | -2566.264989 | -27.87 | 12.49  |
| <b>TS<sub>3Z/4S</sub></b>  | 123i | 0.809933 | -0.052016 | -2567.036586 | -2566.275657 | -33.28 | 5.80   |
| <b>TS<sub>3E/4R</sub></b>  | 106i | 0.812126 | -0.049674 | -2567.037213 | -2566.271749 | -33.67 | 8.25   |
| <b>TS<sub>3E/4S</sub></b>  | 105i | 0.811950 | -0.049710 | -2567.037173 | -2566.271922 | -33.65 | 8.14   |
| <b>TS<sub>4R/5R</sub></b>  | 246i | 0.809849 | -0.043378 | -2567.050374 | -2566.280891 | -41.93 | 2.52   |
| <b>TS<sub>4R/5S</sub></b>  | 151i | 0.812180 | -0.044018 | -2567.053438 | -2566.282265 | -43.86 | 1.65   |
| <b>TS<sub>4S/5R</sub></b>  | 185i | 0.812107 | -0.042871 | -2567.054464 | -2566.282216 | -44.50 | 1.68   |
| <b>TS<sub>4S/5S</sub></b>  | 250i | 0.810401 | -0.042815 | -2567.049268 | -2566.278670 | -41.24 | 3.91   |
| <b>TS<sub>4R/10Z</sub></b> | 282i | 0.810619 | -0.047848 | -2567.019064 | -2566.253282 | -22.29 | 19.84  |
| <b>TS<sub>4S/10Z</sub></b> | 242i | 0.811739 | -0.046567 | -2567.014711 | -2566.246527 | -19.55 | 24.08  |
| <b>TS<sub>5R/7E</sub></b>  | 122i | 0.808461 | -0.044797 | -2567.058172 | -2566.291496 | -46.83 | -4.14  |
| <b>TS<sub>5S/7E</sub></b>  | 142i | 0.809669 | -0.044865 | -2567.052584 | -2566.284768 | -43.32 | 0.08   |
| <b>TS<sub>5R/6R</sub></b>  | 25i  | 0.807875 | -0.048348 | -2567.055924 | -2566.293385 | -45.42 | -5.32  |
| <b>TS<sub>5S/6S</sub></b>  | 32i  | 0.807740 | -0.049778 | -2567.056504 | -2566.295531 | -45.78 | -6.67  |
| <b>TS<sub>6R/7Z</sub></b>  | 156i | 0.808880 | -0.041816 | -2567.065880 | -2566.295804 | -51.66 | -6.84  |
| <b>TS<sub>6S/7Z</sub></b>  | 125i | 0.808171 | -0.042363 | -2567.070440 | -2566.301620 | -54.52 | -10.49 |
| <b>TS<sub>2/8</sub></b>    | 19i  | 0.805248 | -0.049871 | -2567.019554 | -2566.261165 | -22.59 | 14.89  |
| <b>TS<sub>8/9</sub></b>    | 130i | 0.808418 | -0.049019 | -2567.014076 | -2566.251664 | -19.16 | 20.86  |

|                             |      |          |           |              |              |        |        |
|-----------------------------|------|----------|-----------|--------------|--------------|--------|--------|
| <b>TS<sub>9/10E</sub></b>   | 103i | 0.810402 | -0.045773 | -2567.067418 | -2566.299777 | -52.63 | -9.33  |
| <b>TS<sub>10E/11R</sub></b> | 194i | 0.809494 | -0.042829 | -2567.021977 | -2566.252300 | -24.11 | 20.46  |
| <b>TS<sub>10E/11S</sub></b> | 247i | 0.806761 | -0.043585 | -2567.018241 | -2566.252053 | -21.77 | 20.61  |
| <b>TS<sub>11R/10Z</sub></b> | 187i | 0.809494 | -0.042829 | -2567.019591 | -2566.249915 | -22.62 | 21.95  |
| <b>TS<sub>11S/10Z</sub></b> | 261i | 0.808831 | -0.041812 | -2567.022894 | -2566.252863 | -24.69 | 20.10  |
| <b>TS<sub>10Z/6R</sub></b>  | 141i | 0.810384 | -0.045579 | -2567.075080 | -2566.307263 | -57.44 | -14.03 |
| <b>TS<sub>10Z/6S</sub></b>  | 89i  | 0.810429 | -0.045713 | -2567.074395 | -2566.306666 | -57.01 | -13.66 |
| <b>TS<sub>11R/12R</sub></b> | 201i | 0.807726 | -0.046441 | -2567.003028 | -2566.238731 | -12.22 | 28.97  |
| <b>TS<sub>1/7E</sub></b>    | 196i | 0.453791 | -0.040192 | -1752.160040 | -1751.743429 | 19.28  | 35.84  |
| <b>TS<sub>1/S1</sub></b>    | 211i | 0.453805 | -0.038671 | -1752.159837 | -1751.741691 | 19.41  | 36.93  |
| <b>TS<sub>1/S2S</sub></b>   | 171i | 0.802504 | -0.048722 | -2566.958713 | -2566.201919 | 15.59  | 52.07  |
| <b>TS<sub>1/S4S</sub></b>   | 137i | 0.454396 | -0.033897 | -1752.158121 | -1751.734610 | 20.49  | 41.37  |
| <b>TS<sub>7Z/55S</sub></b>  | 142i | 0.809470 | -0.043203 | -2567.057719 | -2566.288440 | -46.54 | -2.22  |
| <b>TS<sub>10Z/55S</sub></b> | 183i | 0.808378 | -0.045256 | -2567.007633 | -2566.241499 | -15.11 | 27.23  |
| <b>TS<sub>S1/S7Z</sub></b>  | 360i | 0.456768 | -0.033678 | -1752.212386 | -1751.786284 | -13.56 | 8.94   |
| <b>TS<sub>S1/S8S</sub></b>  | 127i | 0.809775 | -0.040906 | -2567.035263 | -2566.263382 | -32.45 | 13.50  |
| <b>TS<sub>S7Z/S9R</sub></b> | 159i | 0.809517 | -0.043545 | -2567.046569 | -2566.277585 | -39.54 | 4.59   |
| <b>TS<sub>S7Z/S9S</sub></b> | 135i | 0.812259 | -0.044335 | -2567.050204 | -2566.279268 | -41.83 | 3.53   |
| <b>TS<sub>4R/S10R</sub></b> | 468i | 0.807061 | -0.043392 | -2566.996958 | -2566.230278 | -8.41  | 34.28  |
| <b>TS<sub>4R/S11</sub></b>  | 248i | 0.806703 | -0.041525 | -2566.988203 | -2566.220013 | -2.92  | 40.72  |
| <b>TS<sub>S7Z/S12</sub></b> | 435i | 0.806487 | -0.051010 | -2566.985634 | -2566.227145 | -1.31  | 36.24  |
| <b>5'R</b>                  | 0    | 0.794250 | -0.041931 | -2452.696933 | -2451.941602 | 0.00   | 0.00   |
| <b>5'S</b>                  | 0    | 0.793623 | -0.041394 | -2452.697618 | -2451.942378 | -0.43  | -0.49  |
| <b>TS<sub>5'R/7'E</sub></b> | 120i | 0.790429 | -0.040837 | -2452.695690 | -2451.943086 | 0.78   | -0.93  |
| <b>TS<sub>5'S/7'E</sub></b> | 137i | 0.789205 | -0.043412 | -2452.694872 | -2451.946067 | 1.29   | -2.80  |
| <b>TS<sub>5'R/6'R</sub></b> | 41i  | 0.793687 | -0.044181 | -2452.706565 | -2451.954047 | -6.04  | -7.81  |
| <b>TS<sub>5'S/6'S</sub></b> | 32i  | 0.793126 | -0.043814 | -2452.704990 | -2451.952666 | -5.06  | -6.94  |

### Investigation on the sampling efficiency of the present MD procedure

For the intermediate **5R**, at the GFN2-xTB level, 10 conformers are obtained from the MD procedure for subsequent CD calculations. Here we also adopted the iMTD-GC algorithm to explore its possible lowest energy conformers for comparison. Our calculations for this intermediate lead to 298 conformers. The lowest-energy conformers found in the two methods differ by 0.06 kcal/mol at the same theory level. Taking 10 conformers from the MD procedure as reference structures, the 298 conformers are classified into the corresponding 10 groups according to the minimum RMSD values of seven active atoms. The results are illustrated in **Table S2**. The maximum RMSD value of active atoms compared with the reference structures among the 10 groups is only 0.171 Å. These results indicate that the lowest energy conformers from the iMTD-GC algorithm are energetically and spatially close to those conformers from our MD simulations.

**Table S2.** Number of conformers in each group and maximum RMSD values of active atoms compared with the reference structure in each group.

| Group         | 1     | 2     | 3 | 4     | 5 | 6 | 7 | 8     | 9     | 10    |
|---------------|-------|-------|---|-------|---|---|---|-------|-------|-------|
| Number        | 77    | 13    | 0 | 22    | 0 | 0 | 0 | 69    | 9     | 108   |
| Max. RMSD / Å | 0.090 | 0.107 | - | 0.134 | - | - | - | 0.171 | 0.137 | 0.054 |

#### 4. Reaction pathways for the phosphine-catalyzed hydroboration reaction.

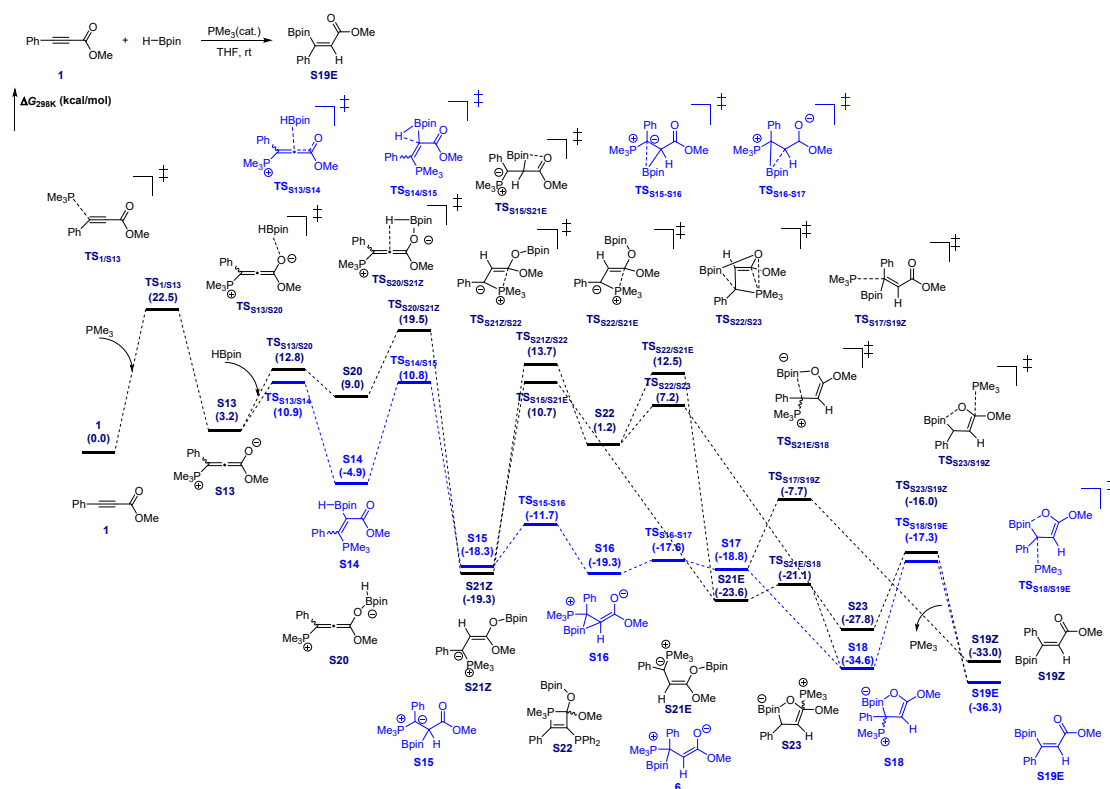

**Fig. S9.** Free energy profiles of the reaction networks for phosphine catalyzed hydroboration reaction. The 3,4-addition pathway (blue curve) is the most favored.

**Table S3.** RI-r<sup>2</sup>SCAN-3c(CPCM(THF)) computed imaginary frequency (ImF); Grimme's QRRHO approximated gas-phase Gibbs free energy corrections (Gc); the solvation free energies (Gsol) computed with the SMD model at the M06-2X/6-31G(d) level in THF solution; the RI- $\omega$ B97M-V/def2-TZVPPD single point energies (Esp); the total Gibbs free energies (G); relative electronic energies ( $\Delta E$ ) and relative Gibbs free energies ( $\Delta G$ ).

| Species          | ImF<br>cm <sup>-1</sup> | Gc/Eh    | Gsol/Eh   | Esp/Eh       | G/Eh         | $\Delta E$<br>(kcal/mol) | $\Delta G$<br>(kcal/mol) |
|------------------|-------------------------|----------|-----------|--------------|--------------|--------------------------|--------------------------|
| PMe <sub>3</sub> | 0                       | 0.082471 | -0.003574 | -461.052599  | -460.970690  | 0.00                     | 0.00                     |
| <b>1</b>         | 0                       | 0.114849 | -0.015097 | -536.287677  | -536.184913  | 0.00                     | 0.00                     |
| <b>HBpin</b>     | 0                       | 0.156806 | -0.007796 | -411.853774  | -411.701753  | 0.00                     | 0.00                     |
| <b>S13</b>       | 0                       | 0.221261 | -0.034333 | -997.340479  | -997.150539  | -0.13                    | 3.18                     |
| <b>S14</b>       | 0                       | 0.403465 | -0.036089 | -1409.235549 | -1408.865162 | -26.04                   | -4.90                    |
| <b>S15</b>       | 0                       | 0.406045 | -0.031534 | -1409.264093 | -1408.886569 | -43.95                   | -18.33                   |
| <b>S16</b>       | 0                       | 0.405946 | -0.033061 | -1409.263948 | -1408.888051 | -43.86                   | -19.26                   |
| <b>S17</b>       | 0                       | 0.405037 | -0.039675 | -1409.255619 | -1408.887245 | -38.63                   | -18.76                   |
| <b>S18</b>       | 0                       | 0.407361 | -0.026315 | -1409.296583 | -1408.912525 | -64.34                   | -34.62                   |
| <b>S19Z</b>      | 0                       | 0.298581 | -0.021839 | -948.218955  | -947.939201  | -48.63                   | -32.97                   |
| <b>S19E</b>      | 0                       | 0.299607 | -0.019456 | -948.227669  | -947.944506  | -54.10                   | -36.30                   |
| <b>S20</b>       | 0                       | 0.402448 | -0.035982 | -1409.212553 | -1408.843075 | -11.61                   | 8.96                     |
| <b>S21Z</b>      | 0                       | 0.405088 | -0.031721 | -1409.264478 | -1408.888100 | -44.19                   | -19.29                   |



|                              |      |          |           |              |              |        |        |
|------------------------------|------|----------|-----------|--------------|--------------|--------|--------|
| <b>S21E</b>                  | 0    | 0.406308 | -0.024851 | -1409.279454 | -1408.894986 | -53.59 | -23.61 |
| <b>S22</b>                   | 0    | 0.404367 | -0.019697 | -1409.243135 | -1408.855453 | -30.80 | 1.19   |
| <b>S23</b>                   | 0    | 0.405743 | -0.031597 | -1409.278840 | -1408.901683 | -53.21 | -27.82 |
| <b>TS<sub>S1/S13</sub></b>   | 151i | 0.218498 | -0.016326 | -997.324949  | -997.119766  | 9.62   | 22.49  |
| <b>TS<sub>S13/S14</sub></b>  | 36i  | 0.401525 | -0.032231 | -1409.212275 | -1408.839969 | -11.44 | 10.91  |
| <b>TS<sub>S14/S15</sub></b>  | 706i | 0.401913 | -0.028643 | -1409.216409 | -1408.840126 | -14.03 | 10.81  |
| <b>TS<sub>S15/S16</sub></b>  | 15i  | 0.406834 | -0.030582 | -1409.255194 | -1408.875930 | -38.37 | -11.65 |
| <b>TS<sub>S15/S21E</sub></b> | 242i | 0.404752 | -0.028064 | -1409.220023 | -1408.840322 | -16.30 | 10.69  |
| <b>TS<sub>S16/S17</sub></b>  | 214i | 0.405385 | -0.036984 | -1409.256896 | -1408.885483 | -39.44 | -17.65 |
| <b>TS<sub>S17/S19Z</sub></b> | 139i | 0.404356 | -0.025554 | -1409.251510 | -1408.869696 | -36.06 | -7.74  |
| <b>TS<sub>S21E/S18</sub></b> | 132i | 0.406840 | -0.023608 | -1409.277191 | -1408.890948 | -52.17 | -21.08 |
| <b>TS<sub>S18/S19E</sub></b> | 97i  | 0.404453 | -0.019689 | -1409.272695 | -1408.884919 | -49.35 | -17.30 |
| <b>TS<sub>S13/S20</sub></b>  | 126i | 0.401377 | -0.037076 | -1409.204192 | -1408.836879 | -6.36  | 12.85  |
| <b>TS<sub>S20/S21Z</sub></b> | 411i | 0.401115 | -0.032096 | -1409.198270 | -1408.826240 | -2.65  | 19.53  |
| <b>TS<sub>S21Z/S22</sub></b> | 305i | 0.404425 | -0.022144 | -1409.220769 | -1408.835476 | -16.77 | 13.73  |
| <b>TS<sub>S22/S21E</sub></b> | 260i | 0.404424 | -0.022312 | -1409.222504 | -1408.837380 | -17.85 | 12.54  |
| <b>TS<sub>S22/S23</sub></b>  | 89i  | 0.402304 | -0.036327 | -1409.214925 | -1408.845937 | -13.10 | 7.17   |
| <b>TS<sub>S23/S19Z</sub></b> | 159i | 0.404921 | -0.024280 | -1409.266544 | -1408.882892 | -45.49 | -16.02 |

## 5. Reaction pathways for the Fe(II) boryl complex mediated C-H borylation reaction.

**Table S4.** PBE0-D3(PCM(C<sub>6</sub>H<sub>6</sub>))/def2-SVP computed imaginary frequency (ImF); Grimme's QRRHO approximated gas-phase Gibbs free energy corrections (Gc); the solvation free energies (Gsol) computed with the SMD model at the M05-2X/6-31G(d) level in C<sub>6</sub>H<sub>6</sub> solution; the RI- $\omega$ B97M-V/ma-def2-TZVPP single point energies (Esp); the total Gibbs free energies (G); relative electronic energies ( $\Delta E$ ) and relative Gibbs free energies ( $\Delta G$ ).

| Species                       | ImF<br>cm <sup>-1</sup> | Gc/Eh    | Gsol/Eh   | Esp/Eh       | G/Eh         | $\Delta E$<br>(kcal/mol) | $\Delta G$<br>(kcal/mol) |
|-------------------------------|-------------------------|----------|-----------|--------------|--------------|--------------------------|--------------------------|
| PEt <sub>3</sub>              | 0                       | 0.164741 | -0.006690 | -578.960384  | -578.799321  | 0.00                     | 0.00                     |
| C <sub>6</sub> H <sub>6</sub> | 0                       | 0.076138 | -0.008533 | -232.229151  | -232.158535  | 0.00                     | 0.00                     |
| Ph-Bpin                       | 0                       | 0.235303 | -0.013189 | -642.920608  | -642.695483  | -                        | -                        |
| HBpin                         | 0                       | 0.158563 | -0.006582 | -411.852466  | -411.697472  | -                        | -                        |
| 12                            | 0                       | 0.612487 | -0.017985 | -3026.442937 | -3025.845423 | 0.00                     | 0.00                     |
| 13                            | 0                       | 0.416659 | -0.018202 | -2447.415574 | -2447.014105 | 42.03                    | 20.08                    |
| 14                            | 0                       | 0.516313 | -0.020818 | -2679.690683 | -2679.192176 | 13.19                    | 7.82                     |
| 15                            | 0                       | 0.513708 | -0.022402 | -2679.675942 | -2679.181624 | 22.44                    | 14.44                    |
| 16                            | 0                       | 0.516077 | -0.020539 | -2679.679945 | -2679.181395 | -22.10                   | 14.58                    |
| 17                            | 0                       | 0.445134 | -0.016994 | -2615.749956 | -2615.318805 | 0.96                     | -6.48                    |
| S24                           | 0                       | 0.515764 | -0.022533 | -2679.652224 | -2679.155981 | 37.32                    | 30.53                    |
| S25                           | 0                       | 0.515127 | -0.021624 | -2679.657803 | -2679.161288 | 33.82                    | 27.20                    |
| S26                           | 0                       | 0.329390 | -0.020454 | -2267.781515 | -2267.469567 | 48.77                    | 23.59                    |
| TS <sub>13/14</sub>           | 703i                    | 0.512490 | -0.020703 | -2679.653703 | -2679.158904 | 36.40                    | 28.70                    |
| TS <sub>14/15</sub>           | 18i                     | 0.516170 | -0.022325 | -2679.663364 | -2679.166508 | 30.33                    | 23.93                    |
| TS <sub>S24/S25a</sub>        | 97i                     | 0.516322 | -0.021616 | -2679.640242 | -2679.142524 | 44.84                    | 38.98                    |
| TS <sub>S24/S25b</sub>        | 171i                    | 0.515386 | -0.021182 | -2679.626493 | -2679.129277 | 53.47                    | 47.29                    |

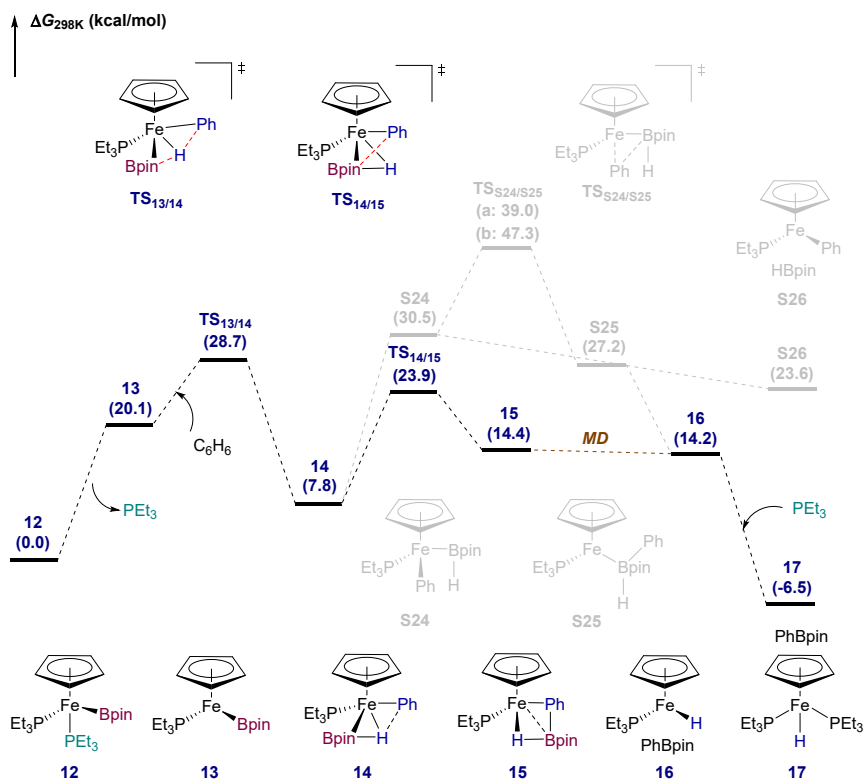

**Fig. S10.** Free energy profiles of the reaction networks for Fe(II) complex mediated C-H borylation explored by the improved MD/CD method.

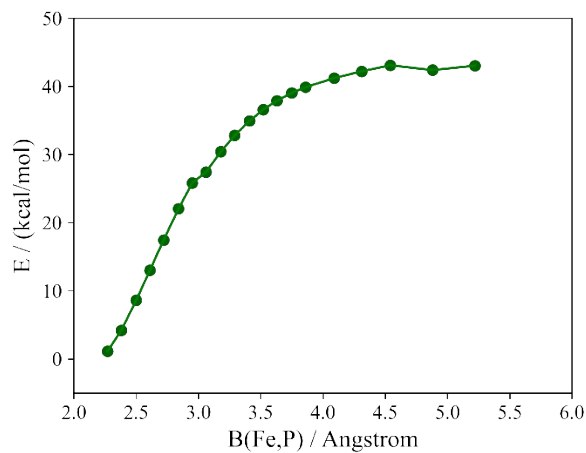

**Fig. S11.** Local potential energy surface of the  $\text{PEt}_3$  disassociation of **12** obtained in the second CD stage at the PCM( $\text{C}_6\text{H}_6$ )/PBE0-D3/def2-SVP level.

## 6. Reaction pathways for the SET-triggered deaminative cross-coupling reaction.

**Table S4.** PCM(DMSO)-(U)B3LYP-D3/6-31G(d) computed imaginary frequency (ImF); Grimme's QRRHO approximated gas-phase Gibbs free energy corrections (Gc); the solvation free energies (Gsol) computed with the uESE model at the (U)B3LYP/def2-TZVP level in DMSO solution; the RI-(U)ωB97M-V/ma-def2-TZVPP single point energies (Esp); the total Gibbs free energies (G); relative electronic energies (ΔE) and relative Gibbs free energies (ΔG).

| Species     | ImF<br>cm <sup>-1</sup> | Gc/Eh    | Gsol/Eh   | Esp/Eh       | G/Eh         | ΔE<br>(kcal/mol) | ΔG<br>(kcal/mol) |
|-------------|-------------------------|----------|-----------|--------------|--------------|------------------|------------------|
| 18          | 0                       | 0.468041 | -0.109909 | -1576.281404 | -1575.920260 | 0.00             | 0.00             |
| 19          | 0                       | 0.387754 | -0.105850 | -1248.325945 | -1248.041029 | 0.00             | 0.00             |
| 20          | -                       | 0.376371 | -0.034380 | -1231.230206 | -1230.885204 | -                | -                |
| 21          | 0                       | 0.282988 | -0.032604 | -941.445279  | -941.191882  | -                | -                |
| 22R         | 0                       | 0.168072 | -0.020028 | -652.099703  | -651.948647  | -                | -                |
| 22S         | 0                       | 0.168016 | -0.020245 | -652.099703  | -651.948920  | -                | -                |
| 23          | 0                       | 0.383414 | -0.044599 | -1248.509112 | -1248.167285 | -                | -                |
| 24          | 0                       | 0.468915 | -0.048995 | -1576.246548 | -1575.823616 | -                | -                |
| 25          | 0                       | 0.071549 | -0.007770 | -307.048426  | -306.981635  | -                | -                |
| 26R         | 0                       | 0.573829 | -0.069161 | -1883.336212 | -1882.828532 | -                | -                |
| 26S         | 0                       | 0.572401 | -0.068660 | -1883.334333 | -1882.827581 | -                | -                |
| TSI         | 608i                    | 0.380378 | -0.045803 | -1248.499013 | -1248.161426 | -                | -                |
| TSIIR       | 30i                     | 0.565854 | -0.053550 | -1883.315920 | -1882.800604 | -                | -                |
| TSIIS       | 32i                     | 0.566055 | -0.053389 | -1883.315849 | -1882.800171 | -                | -                |
| TSIIR       | 186i                    | 0.572651 | -0.063508 | -1883.329564 | -1882.817409 | -                | -                |
| TSIIS       | 211i                    | 0.571570 | -0.063443 | -1883.325360 | -1882.814221 | -                | -                |
| 18@24       | -                       | -        | -0.108881 | -1576.274664 | -1576.380533 | -                | -                |
| 19@23       | -                       | -        | -0.104276 | -1248.320285 | -1248.421549 | -                | -                |
| 24@18       | -                       | -        | -0.051253 | -1576.229342 | -1576.277583 | -                | -                |
| 23@19       | -                       | -        | -0.045647 | -1248.496725 | -1248.539360 | -                | -                |
| 18@24+19@23 | -                       | -        | -         | -            | -            | 7.78             | 9.41             |
| 24@18+23@19 | -                       | -        | -         | -            | -            | 18.57            | 16.50            |
| 23+24       | -                       | -        | -         | -            | -            | -93.07           | -18.58           |
| 24+TSI      | -                       | -        | -         | -            | -            | -86.73           | -14.91           |
| 21+24+25    | -                       | -        | -         | -            | -            | -83.40           | -22.49           |
| 21+ TSIIR   | -                       | -        | -         | -            | -            | -96.54           | -19.58           |
| 21+ TSIIS   | -                       | -        | -         | -            | -            | -96.50           | -19.30           |
| 21+26R      | -                       | -        | -         | -            | -            | -109.28          | -37.10           |
| 21+26S      | -                       | -        | -         | -            | -            | -108.10          | -36.50           |
| 21+ TSIIR   | -                       | -        | -         | -            | -            | -105.10          | -30.12           |
| 21+ TSIIS   | -                       | -        | -         | -            | -            | -102.47          | -28.12           |
| 20+21+22R   | -                       | -        | -         | -            | -            | -105.32          | -40.44           |
| 20+21+22S   | -                       | -        | -         | -            | -            | -105.32          | -40.61           |

## 7. Optimized structures of local minima and transition states along main reaction pathways.

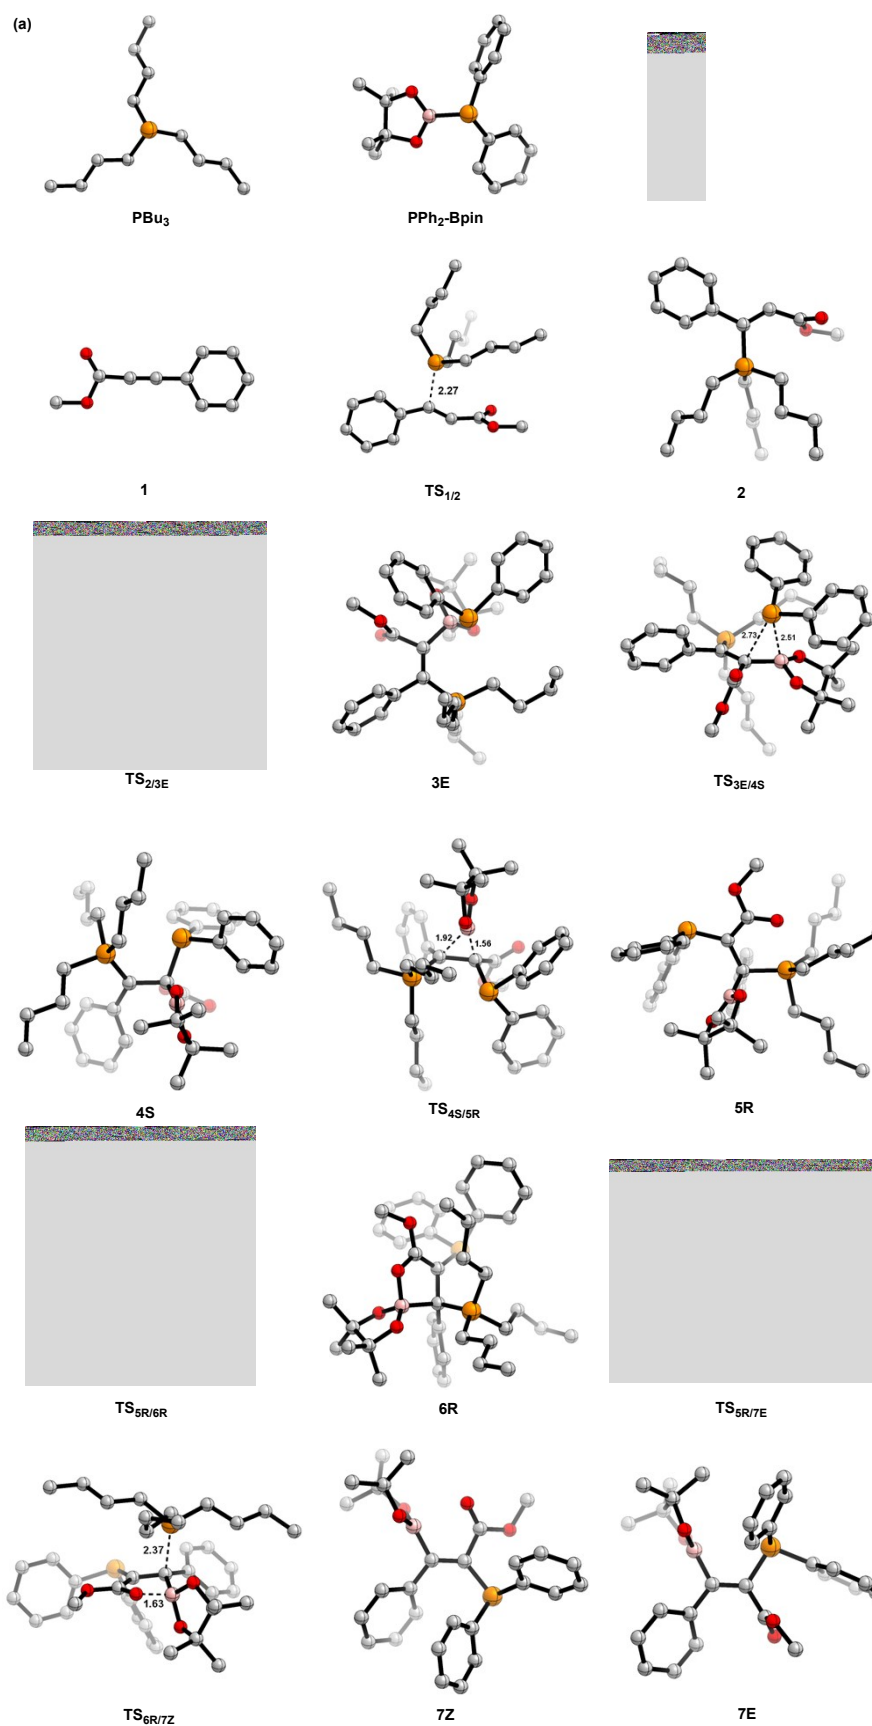

Fig. S12. Optimized structures of the P/B 3,4-addition pathway in the organocatalytic trans

phosphinoboration reaction.

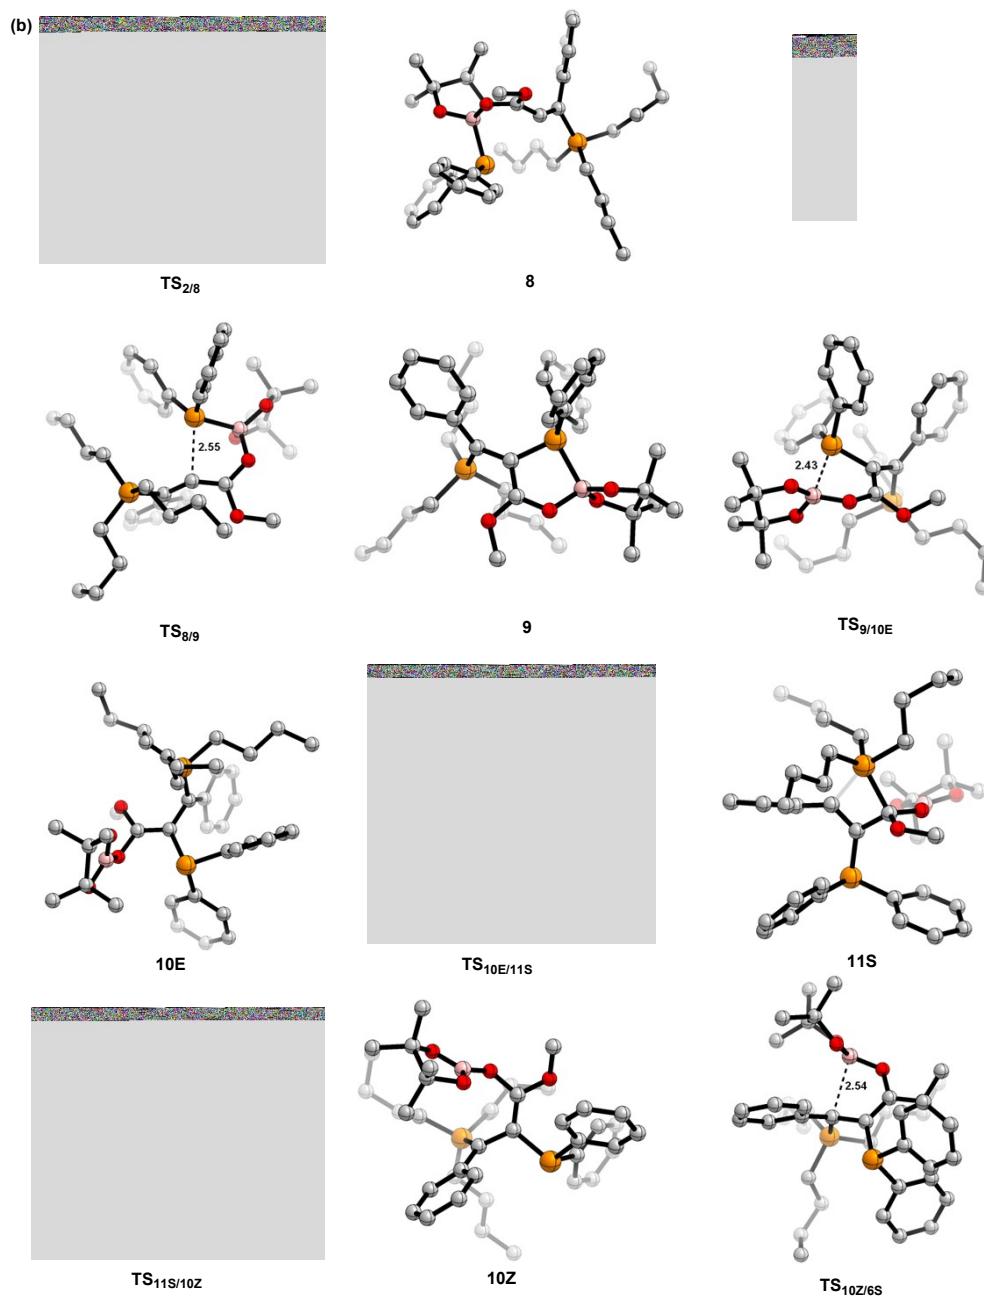

Fig. S13. Optimized structures of the P/B Michael addition pathway in the organocatalytic trans phosphinoboration reaction.

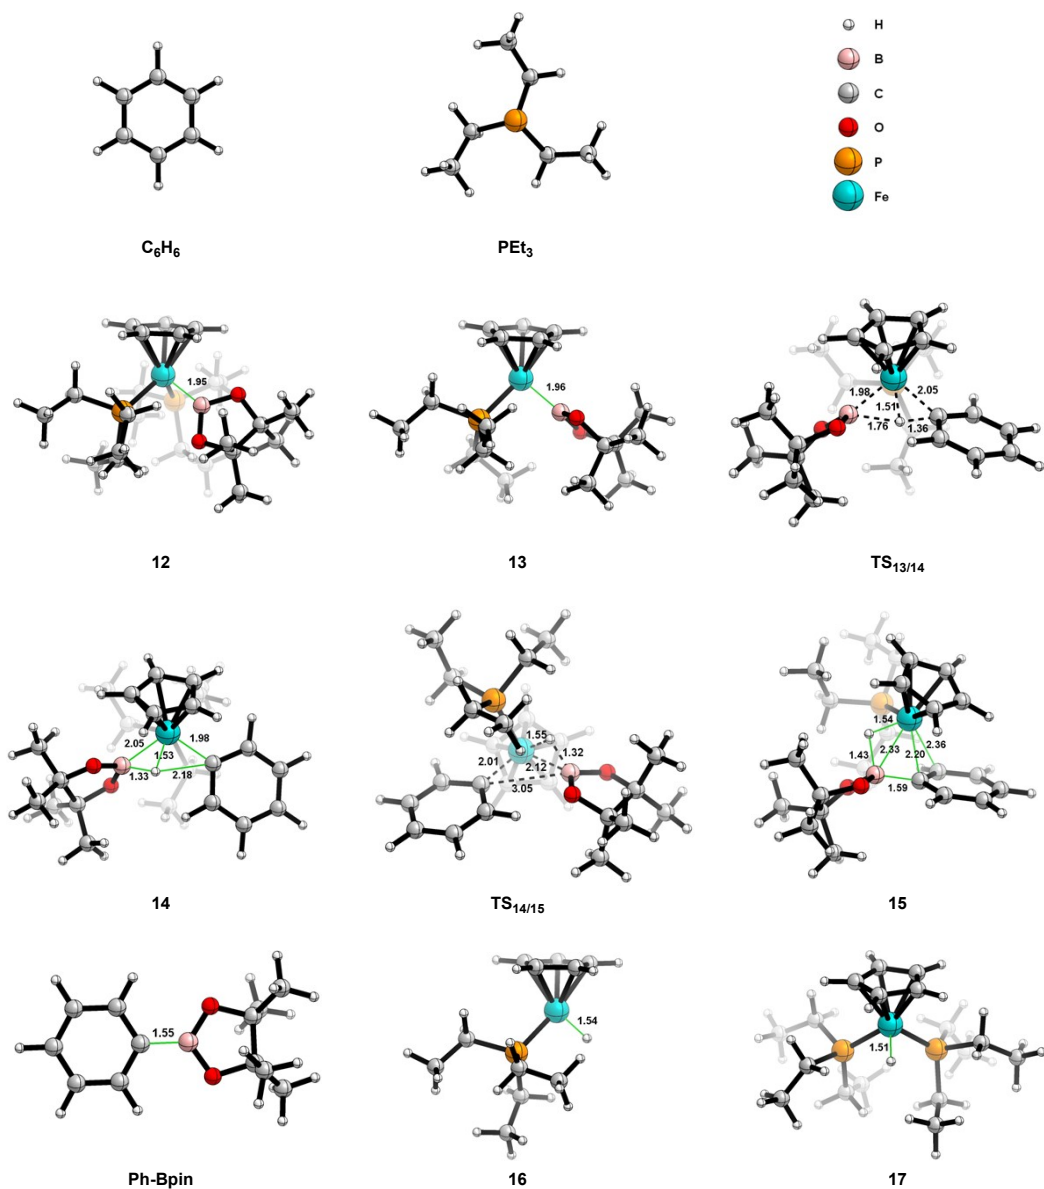

**Fig. S14.** Optimized structures along the main pathway of the Fe(II) complex mediated C-H borylation reaction.

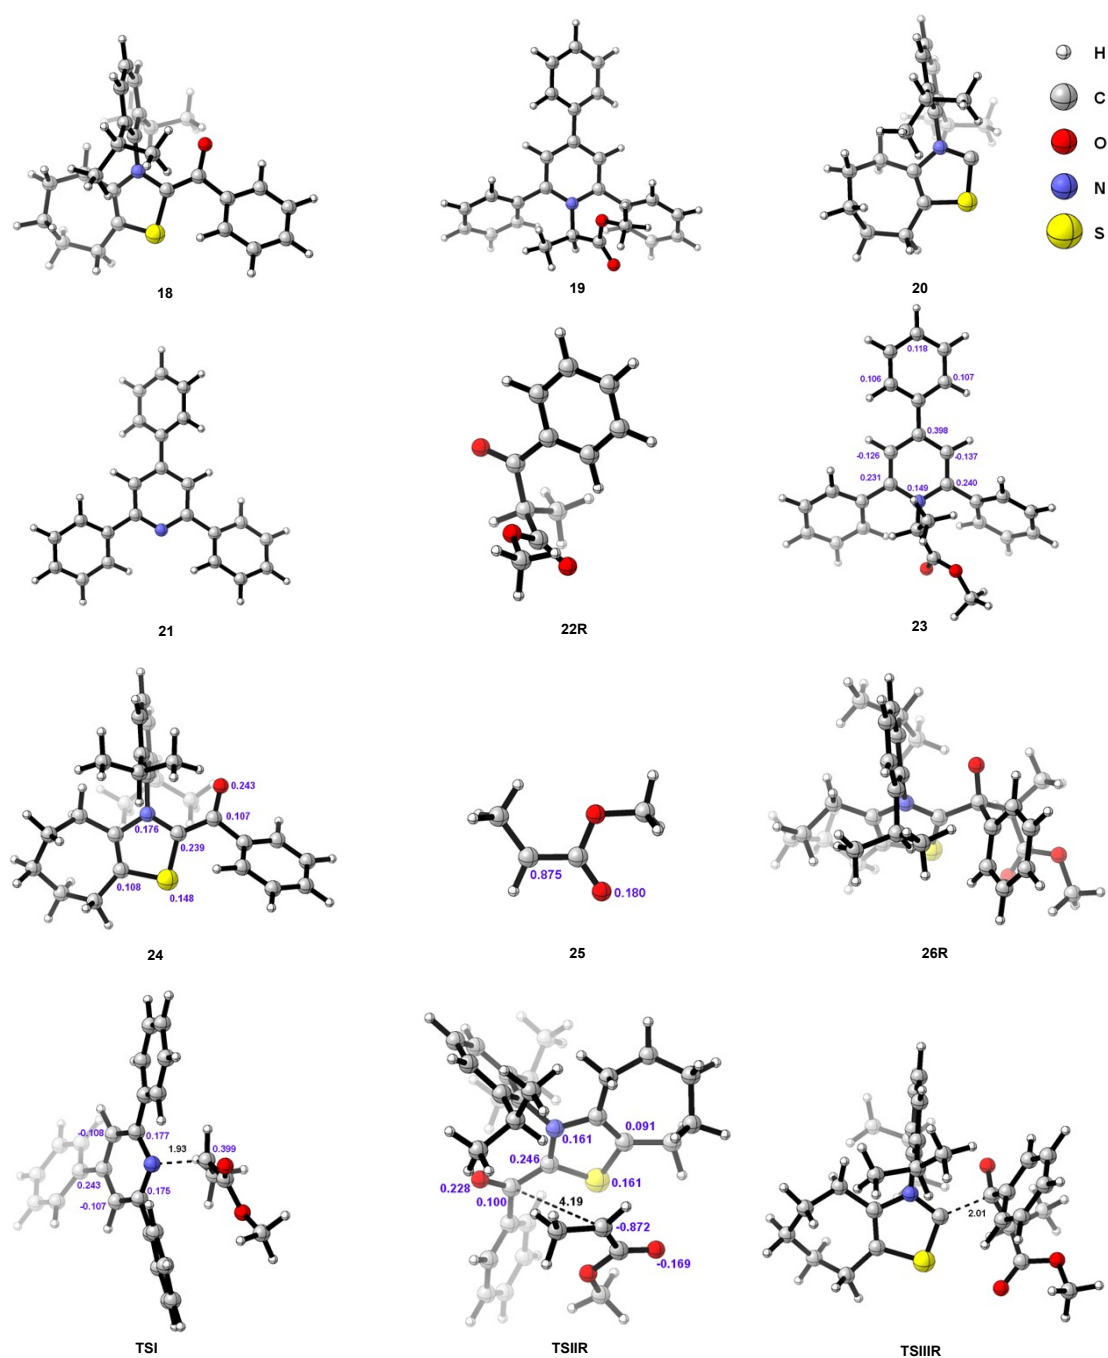

**Fig. S15. Optimized structures along the main pathway of the SET-triggered deaminative cross-coupling reaction.**



## Reference

- (1) Marcus, R. A. On the Theory of Oxidation-Reduction Reactions Involving Electron Transfer. *J. Chem. Phys.* **1956**, 966-978.
- (2) Marcus, R. A. Chemical and Electrochemical Electron-Transfer Theory. *Annu. Rev. Phys. Chem.* **1964** 155-196.
- (3) Frisch, M. J.; Trucks, G. W.; Schlegel, H. B.; Scuseria, G. E.; Robb, M. A.; Cheeseman, J. R.; Scalmani, G.; Barone, V.; Petersson, G. A.; Nakatsuji, H.; et al. *Gaussian 16*, revision A.03; Gaussian, Inc., Wallingford CT, **2016**.
- (4) Lawrence, J. E.; Manolopoulos, D. E. Analytic continuation of Wolynes theory into the Marcus inverted regime. *J. Chem. Phys.* **2018**, 148, 102313.
- (5) Sandmeyer, T. Ueber die Ersetzung der Amidgruppe durch Chlor in den aromatischen Substanzen. *Ber. Dtsch. Chem. Ges.* **1884**, 17, 1633-1635.

**9. DFT-optimized cartesian coordinates of all species involved in the organocatalytic *trans* phosphinoboration reaction.**

**PBu<sub>3</sub>**

|   |              |              |              |
|---|--------------|--------------|--------------|
| P | 0.718356000  | 0.010562000  | -0.010459000 |
| C | -0.175378000 | 1.655649000  | 0.041995000  |
| C | 0.241032000  | 2.606610000  | -1.085985000 |
| H | 0.059024000  | 2.118458000  | 1.009408000  |
| H | -1.263183000 | 1.493858000  | 0.022992000  |
| C | -0.429152000 | 3.981672000  | -0.986878000 |
| H | 1.332491000  | 2.731517000  | -1.073616000 |
| H | -0.003652000 | 2.160689000  | -2.059943000 |
| C | -0.012985000 | 4.928712000  | -2.114903000 |
| H | -1.520606000 | 3.853564000  | -0.995467000 |
| H | -0.182430000 | 4.432716000  | -0.015608000 |
| H | -0.504260000 | 5.903837000  | -2.023309000 |
| H | 1.070631000  | 5.097695000  | -2.107339000 |
| H | -0.275273000 | 4.512822000  | -3.095396000 |
| C | -0.180790000 | -0.770899000 | -1.455754000 |
| C | 0.247609000  | -2.216845000 | -1.730211000 |
| H | 0.035181000  | -0.157174000 | -2.339802000 |
| H | -1.267286000 | -0.720112000 | -1.292717000 |
| C | -0.443554000 | -2.819073000 | -2.958844000 |
| H | 1.336840000  | -2.254764000 | -1.868167000 |
| H | 0.028982000  | -2.845028000 | -0.855626000 |
| C | -0.020924000 | -4.264468000 | -3.232057000 |
| H | -1.532719000 | -2.773010000 | -2.819453000 |
| H | -0.221902000 | -2.196703000 | -3.837067000 |
| H | -0.526590000 | -4.670929000 | -4.115079000 |
| H | 1.060058000  | -4.333125000 | -3.403928000 |
| H | -0.261647000 | -4.913080000 | -2.380898000 |
| C | -0.167299000 | -0.856474000 | 1.393412000  |
| C | 0.273155000  | -0.373148000 | 2.779806000  |
| H | 0.049706000  | -1.928342000 | 1.298895000  |
| H | -1.255140000 | -0.742498000 | 1.277877000  |
| C | -0.410187000 | -1.132804000 | 3.922504000  |
| H | 1.362886000  | -0.476800000 | 2.873144000  |
| H | 0.058695000  | 0.699069000  | 2.887708000  |
| C | 0.032471000  | -0.650594000 | 5.305993000  |
| H | -1.499842000 | -1.027615000 | 3.825611000  |
| H | -0.196810000 | -2.205906000 | 3.819492000  |
| H | -0.469759000 | -1.206866000 | 6.105332000  |
| H | 1.113842000  | -0.776039000 | 5.439173000  |
| H | -0.195967000 | 0.413255000  | 5.444267000  |

**PPh<sub>2</sub>-Bpin**

|   |              |              |              |
|---|--------------|--------------|--------------|
| P | 0.781132000  | 1.352854000  | -0.033682000 |
| B | -0.961033000 | 0.549756000  | 0.138372000  |
| O | -1.566112000 | 0.291906000  | 1.339983000  |
| O | -1.751034000 | 0.275729000  | -0.944516000 |
| C | -2.968828000 | -0.001425000 | 1.057045000  |
| C | -2.914189000 | -0.450656000 | -0.445919000 |
| C | -3.443579000 | -1.068588000 | 2.034585000  |
| C | -3.736664000 | 1.304922000  | 1.271376000  |
| C | -4.124753000 | -0.059659000 | -1.283185000 |
| C | -2.598487000 | -1.938775000 | -0.622005000 |
| H | -3.423677000 | -0.668944000 | 3.052990000  |
| H | -4.472184000 | -1.369854000 | 1.807058000  |
| H | -2.804381000 | -1.953147000 | 2.005463000  |
| H | -4.814752000 | 1.161880000  | 1.147966000  |
| H | -3.548639000 | 1.663449000  | 2.287495000  |
| H | -3.403674000 | 2.076679000  | 0.571073000  |
| H | -3.976734000 | -0.387607000 | -2.316414000 |
| H | -5.031222000 | -0.540701000 | -0.898939000 |
| H | -4.277111000 | 1.021409000  | -1.289768000 |
| H | -3.449952000 | -2.567562000 | -0.343323000 |
| H | -2.356439000 | -2.125356000 | -1.672182000 |
| H | -1.735325000 | -2.232896000 | -0.016854000 |
| C | 1.742979000  | 0.429194000  | 1.248977000  |
| C | 2.985072000  | -0.150035000 | 0.952655000  |
| C | 1.278861000  | 0.388148000  | 2.573764000  |
| C | 3.737723000  | -0.766033000 | 1.953232000  |
| H | 3.363174000  | -0.126479000 | -0.064327000 |
| C | 2.032144000  | -0.231935000 | 3.568895000  |
| H | 0.316717000  | 0.823786000  | 2.821846000  |
| C | 3.264994000  | -0.812126000 | 3.264567000  |
| H | 4.696785000  | -1.212365000 | 1.703300000  |
| H | 1.652274000  | -0.262562000 | 4.586858000  |
| H | 3.851192000  | -1.293661000 | 4.042292000  |
| C | 1.357277000  | 0.587997000  | -1.610747000 |
| C | 1.978667000  | 1.406556000  | -2.562279000 |
| C | 1.205002000  | -0.778793000 | -1.895381000 |
| C | 2.435305000  | 0.877024000  | -3.771682000 |
| H | 2.103329000  | 2.465262000  | -2.352376000 |
| C | 1.660631000  | -1.309505000 | -3.099289000 |
| H | 0.732037000  | -1.428636000 | -1.165488000 |
| C | 2.276430000  | -0.481080000 | -4.041680000 |
| H | 2.914629000  | 1.525918000  | -4.499531000 |
| H | 1.535201000  | -2.369156000 | -3.305361000 |

|          |              |              |              |
|----------|--------------|--------------|--------------|
| H        | 2.630591000  | -0.895490000 | -4.981613000 |
| <b>1</b> |              |              |              |
| C        | 1.328215000  | -0.029567000 | -3.435859000 |
| C        | 0.167975000  | -0.014033000 | -4.213711000 |
| C        | -1.086453000 | 0.010115000  | -3.599529000 |
| C        | -1.185615000 | 0.018787000  | -2.211967000 |
| C        | -0.020916000 | 0.003196000  | -1.421411000 |
| C        | 1.239650000  | -0.021073000 | -2.047572000 |
| H        | 2.303466000  | -0.048383000 | -3.913245000 |
| H        | 0.241382000  | -0.020713000 | -5.297365000 |
| H        | -1.988577000 | 0.022217000  | -4.203965000 |
| H        | -2.154719000 | 0.037497000  | -1.724391000 |
| H        | 2.134449000  | -0.033048000 | -1.433929000 |
| C        | -0.118879000 | 0.011750000  | -0.001852000 |
| C        | -0.198838000 | 0.018809000  | 1.208903000  |
| C        | -0.376324000 | 0.028260000  | 2.638146000  |
| O        | -1.452822000 | 0.048808000  | 3.200408000  |
| O        | 0.815077000  | 0.011206000  | 3.276658000  |
| C        | 0.724865000  | 0.019114000  | 4.710684000  |
| H        | 0.181027000  | -0.860240000 | 5.065654000  |
| H        | 1.755630000  | 0.004086000  | 5.064820000  |
| H        | 0.209652000  | 0.918645000  | 5.057684000  |
| <b>2</b> |              |              |              |
| P        | 0.290270000  | 0.067288000  | 0.003113000  |
| C        | 1.640674000  | -0.277361000 | 1.220368000  |
| C        | 1.589093000  | -1.554203000 | 2.075530000  |
| H        | 1.698651000  | 0.602508000  | 1.867344000  |
| H        | 2.548885000  | -0.261413000 | 0.606695000  |
| C        | 0.642686000  | -1.459033000 | 3.277539000  |
| H        | 1.331699000  | -2.424148000 | 1.461610000  |
| H        | 2.603722000  | -1.744952000 | 2.449689000  |
| C        | 0.598788000  | -2.755402000 | 4.088255000  |
| H        | 0.965924000  | -0.626818000 | 3.916834000  |
| H        | -0.370700000 | -1.207403000 | 2.944300000  |
| H        | -0.060458000 | -2.660206000 | 4.957364000  |
| H        | 0.229316000  | -3.588986000 | 3.478204000  |
| H        | 1.596484000  | -3.028287000 | 4.451850000  |
| C        | 0.761550000  | -0.766770000 | -1.565223000 |
| C        | 1.510735000  | -2.098838000 | -1.424730000 |
| H        | 1.346045000  | -0.045916000 | -2.143514000 |
| H        | -0.163941000 | -0.910252000 | -2.130908000 |
| C        | 1.780441000  | -2.729715000 | -2.795827000 |
| H        | 2.465470000  | -1.944785000 | -0.906260000 |
| H        | 0.937431000  | -2.805417000 | -0.812550000 |

|           |              |              |              |
|-----------|--------------|--------------|--------------|
| C         | 2.545157000  | -4.050791000 | -2.693157000 |
| H         | 0.823711000  | -2.891726000 | -3.310262000 |
| H         | 2.341456000  | -2.018037000 | -3.415162000 |
| H         | 2.720972000  | -4.485752000 | -3.682672000 |
| H         | 3.520831000  | -3.906993000 | -2.213491000 |
| H         | 1.988139000  | -4.785654000 | -2.099011000 |
| C         | -1.351868000 | -0.619281000 | 0.469167000  |
| C         | -1.543778000 | -2.139780000 | 0.454478000  |
| H         | -2.011993000 | -0.148274000 | -0.270868000 |
| H         | -1.623600000 | -0.194029000 | 1.441761000  |
| C         | -2.968731000 | -2.531134000 | 0.863444000  |
| H         | -1.340192000 | -2.525254000 | -0.552091000 |
| H         | -0.832523000 | -2.630911000 | 1.127612000  |
| C         | -3.190391000 | -4.044730000 | 0.838468000  |
| H         | -3.172226000 | -2.142664000 | 1.870757000  |
| H         | -3.684382000 | -2.036949000 | 0.193162000  |
| H         | -2.504484000 | -4.555334000 | 1.525471000  |
| H         | -4.212754000 | -4.302752000 | 1.134098000  |
| H         | -3.019329000 | -4.451705000 | -0.165285000 |
| C         | 0.344730000  | 3.401015000  | 3.183862000  |
| C         | 0.902757000  | 4.641548000  | 2.878763000  |
| C         | 1.172808000  | 4.961860000  | 1.544989000  |
| C         | 0.903607000  | 4.047045000  | 0.531476000  |
| C         | 0.354922000  | 2.788157000  | 0.823191000  |
| C         | 0.070204000  | 2.487404000  | 2.164707000  |
| H         | 0.107723000  | 3.146204000  | 4.213603000  |
| H         | 1.118631000  | 5.354694000  | 3.669327000  |
| H         | 1.600874000  | 5.929231000  | 1.295458000  |
| H         | 1.098686000  | 4.286477000  | -0.508982000 |
| H         | -0.400173000 | 1.540943000  | 2.422078000  |
| C         | 0.064378000  | 1.853358000  | -0.299627000 |
| C         | -0.410369000 | 2.250850000  | -1.485371000 |
| C         | -0.762748000 | 1.536227000  | -2.653348000 |
| O         | -0.110018000 | 1.421229000  | -3.690094000 |
| O         | -2.055565000 | 1.008851000  | -2.560853000 |
| C         | -2.572957000 | 0.503041000  | -3.791821000 |
| H         | -2.573931000 | 1.275530000  | -4.566551000 |
| H         | -1.983359000 | -0.345106000 | -4.156791000 |
| H         | -3.595386000 | 0.184783000  | -3.575792000 |
| <b>3Z</b> |              |              |              |
| P         | -1.212123000 | -1.746394000 | -1.155516000 |
| C         | -1.568267000 | -3.381410000 | -0.423040000 |
| C         | -0.728498000 | -3.622053000 | 0.843394000  |
| H         | -1.406696000 | -4.163567000 | -1.173300000 |

|   |              |              |              |
|---|--------------|--------------|--------------|
| H | -2.636966000 | -3.372780000 | -0.180978000 |
| C | -1.288363000 | -4.761299000 | 1.700398000  |
| H | 0.307552000  | -3.846512000 | 0.558852000  |
| H | -0.684058000 | -2.703260000 | 1.442028000  |
| C | -0.455725000 | -5.001201000 | 2.961116000  |
| H | -2.322864000 | -4.518465000 | 1.979030000  |
| H | -1.337884000 | -5.681700000 | 1.102143000  |
| H | -0.417592000 | -4.099244000 | 3.582774000  |
| H | -0.876756000 | -5.810652000 | 3.566663000  |
| H | 0.575796000  | -5.272978000 | 2.707718000  |
| C | 0.569235000  | -1.662980000 | -1.533551000 |
| C | 1.036950000  | -2.699611000 | -2.564433000 |
| H | 1.094441000  | -1.785201000 | -0.585016000 |
| H | 0.779427000  | -0.646238000 | -1.879511000 |
| C | 2.548502000  | -2.596720000 | -2.823268000 |
| H | 0.801287000  | -3.712947000 | -2.212460000 |
| H | 0.499247000  | -2.559305000 | -3.509921000 |
| C | 3.409059000  | -2.885299000 | -1.589561000 |
| H | 2.808610000  | -3.301685000 | -3.622659000 |
| H | 2.777098000  | -1.593966000 | -3.208620000 |
| H | 4.472858000  | -2.880994000 | -1.848394000 |
| H | 3.262020000  | -2.140459000 | -0.799841000 |
| H | 3.173399000  | -3.870274000 | -1.167413000 |
| C | -2.119530000 | -1.580686000 | -2.733439000 |
| C | -1.789229000 | -0.245128000 | -3.424365000 |
| H | -3.185569000 | -1.632624000 | -2.487169000 |
| H | -1.883906000 | -2.442848000 | -3.365893000 |
| C | -2.745036000 | 0.083448000  | -4.577601000 |
| H | -1.826594000 | 0.565180000  | -2.686971000 |
| H | -0.758327000 | -0.273899000 | -3.801432000 |
| C | -2.697940000 | -0.922079000 | -5.730938000 |
| H | -3.768035000 | 0.152944000  | -4.184108000 |
| H | -2.493453000 | 1.083016000  | -4.952824000 |
| H | -3.025259000 | -1.919858000 | -5.416013000 |
| H | -3.350698000 | -0.609221000 | -6.552495000 |
| H | -1.680246000 | -1.015064000 | -6.130548000 |
| P | -2.441140000 | 2.912928000  | -0.254095000 |
| B | -1.593517000 | 1.824045000  | 1.318130000  |
| O | -0.483148000 | 2.465334000  | 2.000097000  |
| O | -2.607581000 | 1.541860000  | 2.299931000  |
| C | -0.804043000 | 2.604498000  | 3.388007000  |
| C | -1.981778000 | 1.576370000  | 3.587260000  |
| C | 0.458451000  | 2.285195000  | 4.191649000  |
| C | -1.225243000 | 4.056112000  | 3.651629000  |

|   |              |              |              |
|---|--------------|--------------|--------------|
| C | -3.033531000 | 2.000073000  | 4.610352000  |
| C | -1.478496000 | 0.161051000  | 3.919769000  |
| H | 0.258344000  | 2.280970000  | 5.269949000  |
| H | 0.873946000  | 1.317799000  | 3.901060000  |
| H | 1.217125000  | 3.050245000  | 3.993043000  |
| H | -2.127629000 | 4.318115000  | 3.098190000  |
| H | -1.399018000 | 4.240177000  | 4.718147000  |
| H | -0.419820000 | 4.720139000  | 3.319641000  |
| H | -3.818395000 | 1.237497000  | 4.663629000  |
| H | -2.594588000 | 2.109126000  | 5.609164000  |
| H | -3.498818000 | 2.944780000  | 4.322678000  |
| H | -2.328038000 | -0.528466000 | 3.879656000  |
| H | -0.725452000 | -0.173586000 | 3.200285000  |
| H | -1.042552000 | 0.108341000  | 4.923453000  |
| C | -3.220146000 | 4.291587000  | 0.680774000  |
| C | -2.870612000 | 5.645543000  | 0.561732000  |
| C | -4.288120000 | 3.956132000  | 1.537317000  |
| C | -3.543109000 | 6.626771000  | 1.291863000  |
| H | -2.061263000 | 5.936456000  | -0.099560000 |
| C | -4.953409000 | 4.936782000  | 2.269288000  |
| H | -4.569486000 | 2.914696000  | 1.649700000  |
| C | -4.582164000 | 6.279132000  | 2.155123000  |
| H | -3.248317000 | 7.668338000  | 1.186945000  |
| H | -5.765325000 | 4.651490000  | 2.934319000  |
| H | -5.100478000 | 7.043701000  | 2.727777000  |
| C | -0.952053000 | 3.687416000  | -1.027529000 |
| C | 0.023217000  | 4.396056000  | -0.304063000 |
| C | -0.742025000 | 3.492489000  | -2.400412000 |
| C | 1.161027000  | 4.893141000  | -0.936722000 |
| H | -0.105645000 | 4.519821000  | 0.763672000  |
| C | 0.406699000  | 3.970675000  | -3.034749000 |
| H | -1.495976000 | 2.961365000  | -2.977279000 |
| C | 1.361164000  | 4.678321000  | -2.304095000 |
| H | 1.901907000  | 5.442136000  | -0.359932000 |
| H | 0.547967000  | 3.805202000  | -4.100385000 |
| H | 2.250129000  | 5.066623000  | -2.795255000 |
| C | -5.598304000 | -0.171422000 | -0.368942000 |
| C | -6.019792000 | -0.921021000 | 0.729196000  |
| C | -5.073182000 | -1.504145000 | 1.573785000  |
| C | -3.714086000 | -1.338107000 | 1.315248000  |
| C | -3.279470000 | -0.588868000 | 0.212667000  |
| C | -4.236835000 | -0.010198000 | -0.630810000 |
| H | -6.328200000 | 0.302425000  | -1.019072000 |
| H | -7.080094000 | -1.042001000 | 0.932586000  |

|   |              |              |              |
|---|--------------|--------------|--------------|
| H | -5.392202000 | -2.075405000 | 2.441076000  |
| H | -2.974423000 | -1.762535000 | 1.986377000  |
| H | -3.912422000 | 0.619596000  | -1.450666000 |
| C | -1.804458000 | -0.466769000 | -0.040625000 |
| C | -1.028027000 | 0.489191000  | 0.512464000  |
| C | 0.450541000  | 0.458840000  | 0.497314000  |
| O | 1.109107000  | -0.239827000 | 1.252797000  |
| O | 0.983358000  | 1.325995000  | -0.376473000 |
| C | 2.380301000  | 1.611613000  | -0.202297000 |
| H | 2.981859000  | 0.708471000  | -0.342230000 |
| H | 2.610992000  | 2.362176000  | -0.955829000 |
| H | 2.544123000  | 2.009382000  | 0.801571000  |

### 3E

|   |              |              |              |
|---|--------------|--------------|--------------|
| P | -1.169478000 | -1.652353000 | -1.233008000 |
| C | -1.950190000 | -3.201562000 | -0.651761000 |
| C | -1.545355000 | -3.563590000 | 0.784565000  |
| H | -1.695310000 | -4.002943000 | -1.354824000 |
| H | -3.031942000 | -3.042829000 | -0.716366000 |
| C | -2.449253000 | -4.645477000 | 1.382414000  |
| H | -0.499346000 | -3.891968000 | 0.803559000  |
| H | -1.582574000 | -2.668068000 | 1.413825000  |
| C | -2.070943000 | -4.986516000 | 2.825240000  |
| H | -3.490563000 | -4.296657000 | 1.345228000  |
| H | -2.403290000 | -5.549872000 | 0.759809000  |
| H | -2.163637000 | -4.106604000 | 3.472543000  |
| H | -2.717623000 | -5.771333000 | 3.232136000  |
| H | -1.034283000 | -5.336822000 | 2.890759000  |
| C | 0.629872000  | -1.863021000 | -1.217395000 |
| C | 1.154194000  | -2.936933000 | -2.178654000 |
| H | 0.874108000  | -2.092718000 | -0.176153000 |
| H | 1.073129000  | -0.880030000 | -1.408879000 |
| C | 2.663212000  | -3.159247000 | -1.980877000 |
| H | 0.630625000  | -3.890560000 | -2.022623000 |
| H | 0.966394000  | -2.639267000 | -3.218100000 |
| C | 3.031047000  | -3.735521000 | -0.610286000 |
| H | 3.018000000  | -3.835659000 | -2.769071000 |
| H | 3.184690000  | -2.204656000 | -2.132618000 |
| H | 4.105067000  | -3.941060000 | -0.553037000 |
| H | 2.790997000  | -3.048240000 | 0.206894000  |
| H | 2.500803000  | -4.678839000 | -0.426526000 |
| C | -1.689963000 | -1.439440000 | -2.976182000 |
| C | -1.145804000 | -0.141133000 | -3.587725000 |
| H | -2.784675000 | -1.454880000 | -2.999412000 |
| H | -1.342408000 | -2.322924000 | -3.522615000 |



|   |              |              |              |
|---|--------------|--------------|--------------|
| C | -1.617270000 | 0.089867000  | -5.029101000 |
| H | -1.448704000 | 0.703694000  | -2.960145000 |
| H | -0.048803000 | -0.155533000 | -3.560399000 |
| C | -1.111673000 | -0.958775000 | -6.023701000 |
| H | -2.715583000 | 0.123134000  | -5.050831000 |
| H | -1.274597000 | 1.083144000  | -5.344094000 |
| H | -1.504489000 | -1.957601000 | -5.801319000 |
| H | -1.414840000 | -0.710251000 | -7.046175000 |
| H | -0.016424000 | -1.019431000 | -6.005477000 |
| P | 0.976839000  | -0.626246000 | 1.878560000  |
| B | 0.435523000  | 0.953041000  | 0.643960000  |
| O | 0.571460000  | 2.256884000  | 1.263933000  |
| O | 1.280526000  | 0.961218000  | -0.542657000 |
| C | 1.458579000  | 3.078636000  | 0.502895000  |
| C | 1.553077000  | 2.330637000  | -0.883408000 |
| C | 0.842451000  | 4.477767000  | 0.417806000  |
| C | 2.799888000  | 3.161518000  | 1.243623000  |
| C | 2.931649000  | 2.385873000  | -1.538741000 |
| C | 0.486418000  | 2.796513000  | -1.887069000 |
| H | 1.430374000  | 5.136662000  | -0.232528000 |
| H | -0.184776000 | 4.432506000  | 0.052383000  |
| H | 0.823921000  | 4.922868000  | 1.418542000  |
| H | 3.275800000  | 2.184663000  | 1.327060000  |
| H | 3.493050000  | 3.854099000  | 0.752456000  |
| H | 2.612435000  | 3.530736000  | 2.257226000  |
| H | 2.913228000  | 1.831198000  | -2.484080000 |
| H | 3.221196000  | 3.419539000  | -1.759714000 |
| H | 3.691291000  | 1.938099000  | -0.895243000 |
| H | 0.522143000  | 2.143199000  | -2.765282000 |
| H | -0.518102000 | 2.747759000  | -1.457400000 |
| H | 0.666874000  | 3.823020000  | -2.223685000 |
| C | 2.750216000  | -0.270006000 | 2.193580000  |
| C | 3.296973000  | 0.031725000  | 3.450004000  |
| C | 3.630936000  | -0.368393000 | 1.097459000  |
| C | 4.667929000  | 0.242968000  | 3.602897000  |
| H | 2.645430000  | 0.110129000  | 4.313876000  |
| C | 4.998970000  | -0.156613000 | 1.251368000  |
| H | 3.229083000  | -0.573497000 | 0.111270000  |
| C | 5.526779000  | 0.153615000  | 2.507027000  |
| H | 5.065639000  | 0.482290000  | 4.586225000  |
| H | 5.654628000  | -0.227992000 | 0.386676000  |
| H | 6.593335000  | 0.321483000  | 2.629082000  |
| C | 0.128019000  | -0.200093000 | 3.458671000  |
| C | 0.209881000  | 1.065436000  | 4.063891000  |

|           |              |              |              |
|-----------|--------------|--------------|--------------|
| C         | -0.698651000 | -1.166966000 | 4.049182000  |
| C         | -0.508801000 | 1.345415000  | 5.224678000  |
| H         | 0.807907000  | 1.834450000  | 3.590097000  |
| C         | -1.437748000 | -0.881982000 | 5.199299000  |
| H         | -0.752590000 | -2.156824000 | 3.603557000  |
| C         | -1.340497000 | 0.376176000  | 5.793267000  |
| H         | -0.430840000 | 2.328827000  | 5.682378000  |
| H         | -2.075411000 | -1.645529000 | 5.638550000  |
| H         | -1.903836000 | 0.599916000  | 6.695735000  |
| C         | -5.580958000 | -0.075830000 | -1.119305000 |
| C         | -6.159019000 | -0.582998000 | 0.044895000  |
| C         | -5.344285000 | -0.973552000 | 1.109694000  |
| C         | -3.957752000 | -0.876000000 | 1.003116000  |
| C         | -3.365223000 | -0.389104000 | -0.173388000 |
| C         | -4.193274000 | 0.022240000  | -1.226723000 |
| H         | -6.209758000 | 0.257033000  | -1.940228000 |
| H         | -7.239391000 | -0.659224000 | 0.128147000  |
| H         | -5.788353000 | -1.347730000 | 2.027858000  |
| H         | -3.321039000 | -1.146972000 | 1.839417000  |
| H         | -3.748971000 | 0.456249000  | -2.116975000 |
| C         | -1.867391000 | -0.303028000 | -0.253674000 |
| C         | -1.172783000 | 0.681295000  | 0.361458000  |
| C         | -2.007805000 | 1.777651000  | 0.946702000  |
| O         | -2.362956000 | 2.751318000  | 0.311571000  |
| O         | -2.284951000 | 1.572378000  | 2.241450000  |
| C         | -2.920512000 | 2.664787000  | 2.920923000  |
| H         | -3.899435000 | 2.872420000  | 2.480812000  |
| H         | -3.014938000 | 2.339420000  | 3.955850000  |
| H         | -2.293665000 | 3.557205000  | 2.852816000  |
| <b>4R</b> |              |              |              |
| P         | -1.706359000 | -1.277602000 | -0.515492000 |
| C         | -3.480027000 | -1.567044000 | -0.956259000 |
| C         | -4.262764000 | -0.298000000 | -1.359529000 |
| H         | -3.938102000 | -2.034553000 | -0.080041000 |
| H         | -3.492300000 | -2.321473000 | -1.749917000 |
| C         | -5.655759000 | -0.231231000 | -0.724604000 |
| H         | -3.698437000 | 0.592783000  | -1.067937000 |
| H         | -4.356071000 | -0.259814000 | -2.450961000 |
| C         | -6.368987000 | 1.083494000  | -1.042278000 |
| H         | -6.261098000 | -1.082280000 | -1.069393000 |
| H         | -5.553614000 | -0.332397000 | 0.360940000  |
| H         | -7.367278000 | 1.115635000  | -0.591556000 |
| H         | -5.795783000 | 1.930340000  | -0.647942000 |
| H         | -6.483651000 | 1.228024000  | -2.124077000 |

|   |              |              |              |
|---|--------------|--------------|--------------|
| C | -1.143337000 | -2.949885000 | 0.070199000  |
| C | -1.436500000 | -4.149688000 | -0.837073000 |
| H | -1.593941000 | -3.094844000 | 1.059330000  |
| H | -0.067624000 | -2.840770000 | 0.238351000  |
| C | -0.769862000 | -5.435088000 | -0.331344000 |
| H | -2.519721000 | -4.311090000 | -0.910230000 |
| H | -1.088142000 | -3.948845000 | -1.860011000 |
| C | -1.068447000 | -6.648808000 | -1.214078000 |
| H | 0.315900000  | -5.275247000 | -0.273857000 |
| H | -1.104022000 | -5.632214000 | 0.696471000  |
| H | -2.146228000 | -6.846056000 | -1.261230000 |
| H | -0.716915000 | -6.486450000 | -2.240323000 |
| H | -0.579902000 | -7.552197000 | -0.832682000 |
| C | -0.767784000 | -1.018660000 | -2.086145000 |
| C | -1.591584000 | -0.523472000 | -3.278897000 |
| H | -0.236044000 | -1.944499000 | -2.336723000 |
| H | -0.014180000 | -0.261709000 | -1.872717000 |
| C | -0.697364000 | -0.158341000 | -4.467594000 |
| H | -2.317856000 | -1.287151000 | -3.586383000 |
| H | -2.151204000 | 0.363921000  | -2.974736000 |
| C | -1.501764000 | 0.314041000  | -5.680438000 |
| H | -0.005187000 | 0.633884000  | -4.153403000 |
| H | -0.076863000 | -1.022503000 | -4.746745000 |
| H | -0.846563000 | 0.588781000  | -6.514559000 |
| H | -2.182261000 | -0.470357000 | -6.033779000 |
| H | -2.108983000 | 1.190870000  | -5.426917000 |
| P | -0.040665000 | 1.685544000  | 2.357003000  |
| B | 1.026362000  | 0.337425000  | 0.076416000  |
| O | 1.396524000  | -0.958857000 | 0.340246000  |
| O | 1.951876000  | 1.004702000  | -0.684136000 |
| C | 2.764465000  | -1.160231000 | -0.116051000 |
| C | 3.016995000  | 0.087739000  | -1.058868000 |
| C | 3.645208000  | -1.180135000 | 1.132592000  |
| C | 2.822889000  | -2.513974000 | -0.818612000 |
| C | 2.845696000  | -0.202902000 | -2.552875000 |
| C | 4.354210000  | 0.788417000  | -0.836717000 |
| H | 4.691639000  | -1.373378000 | 0.876214000  |
| H | 3.582863000  | -0.240896000 | 1.681854000  |
| H | 3.300400000  | -1.978990000 | 1.796460000  |
| H | 2.591959000  | -3.306797000 | -0.100038000 |
| H | 2.103655000  | -2.578582000 | -1.637877000 |
| H | 3.824793000  | -2.701901000 | -1.218649000 |
| H | 1.896682000  | -0.692465000 | -2.774288000 |
| H | 2.866311000  | 0.745955000  | -3.096968000 |

|   |              |              |              |
|---|--------------|--------------|--------------|
| H | 3.657560000  | -0.833134000 | -2.929561000 |
| H | 4.472981000  | 1.118142000  | 0.194743000  |
| H | 5.184341000  | 0.122297000  | -1.096648000 |
| H | 4.410189000  | 1.669032000  | -1.484231000 |
| C | -0.500524000 | 0.243697000  | 3.409127000  |
| C | -0.105298000 | -1.083207000 | 3.179280000  |
| C | -1.332509000 | 0.522376000  | 4.500027000  |
| C | -0.546646000 | -2.103379000 | 4.019356000  |
| H | 0.535314000  | -1.314298000 | 2.338524000  |
| C | -1.764556000 | -0.497665000 | 5.349637000  |
| H | -1.670254000 | 1.541629000  | 4.663439000  |
| C | -1.377945000 | -1.813983000 | 5.105883000  |
| H | -0.240427000 | -3.129185000 | 3.827496000  |
| H | -2.417377000 | -0.264443000 | 6.186054000  |
| H | -1.721735000 | -2.613498000 | 5.757091000  |
| C | 1.794550000  | 1.738711000  | 2.617275000  |
| C | 2.584549000  | 2.630072000  | 1.867327000  |
| C | 2.402867000  | 1.069340000  | 3.694663000  |
| C | 3.932838000  | 2.817526000  | 2.164544000  |
| H | 2.138133000  | 3.166980000  | 1.040047000  |
| C | 3.751159000  | 1.265353000  | 3.995277000  |
| H | 1.819757000  | 0.387183000  | 4.301781000  |
| C | 4.526725000  | 2.134751000  | 3.228444000  |
| H | 4.522015000  | 3.504727000  | 1.562411000  |
| H | 4.195679000  | 0.729926000  | 4.830258000  |
| H | 5.577216000  | 2.285975000  | 3.461026000  |
| C | -4.498585000 | -0.316317000 | 2.921815000  |
| C | -4.927260000 | 1.004721000  | 3.067728000  |
| C | -4.239416000 | 2.011199000  | 2.385892000  |
| C | -3.159375000 | 1.704033000  | 1.561438000  |
| C | -2.702877000 | 0.375762000  | 1.398040000  |
| C | -3.404334000 | -0.618132000 | 2.117327000  |
| H | -4.995925000 | -1.114588000 | 3.467502000  |
| H | -5.771005000 | 1.246675000  | 3.707553000  |
| H | -4.554736000 | 3.047198000  | 2.484203000  |
| H | -2.668082000 | 2.506785000  | 1.022469000  |
| H | -3.033012000 | -1.638245000 | 2.101720000  |
| C | -1.544434000 | 0.051813000  | 0.553607000  |
| C | -0.346776000 | 0.984720000  | 0.526735000  |
| C | -0.571207000 | 2.175847000  | -0.407978000 |
| O | -1.235172000 | 2.151444000  | -1.425646000 |
| O | 0.100320000  | 3.285214000  | -0.022118000 |
| C | 0.018318000  | 4.404211000  | -0.914571000 |
| H | 0.434915000  | 4.140987000  | -1.890369000 |

|           |              |              |              |
|-----------|--------------|--------------|--------------|
| H         | -1.021246000 | 4.715614000  | -1.041882000 |
| H         | 0.602766000  | 5.196221000  | -0.445522000 |
| <b>4S</b> |              |              |              |
| P         | 0.135583000  | -0.694267000 | -0.548000000 |
| C         | 0.352409000  | -2.521566000 | -0.385339000 |
| C         | -0.923221000 | -3.270572000 | 0.010431000  |
| H         | 1.146825000  | -2.734261000 | 0.331364000  |
| H         | 0.710920000  | -2.856267000 | -1.368054000 |
| C         | -0.685931000 | -4.772640000 | 0.190526000  |
| H         | -1.310053000 | -2.852352000 | 0.944252000  |
| H         | -1.699419000 | -3.110919000 | -0.749194000 |
| C         | -1.962429000 | -5.515174000 | 0.591048000  |
| H         | -0.280941000 | -5.200311000 | -0.737879000 |
| H         | 0.082160000  | -4.919594000 | 0.961810000  |
| H         | -1.779273000 | -6.586988000 | 0.725427000  |
| H         | -2.361489000 | -5.121124000 | 1.533158000  |
| H         | -2.741249000 | -5.401489000 | -0.173229000 |
| C         | 1.843361000  | -0.138965000 | -1.072336000 |
| C         | 2.874821000  | -0.134877000 | 0.058454000  |
| H         | 1.728899000  | 0.874552000  | -1.469335000 |
| H         | 2.176172000  | -0.772383000 | -1.905235000 |
| C         | 4.176247000  | 0.574320000  | -0.333146000 |
| H         | 2.441868000  | 0.357353000  | 0.938657000  |
| H         | 3.104513000  | -1.163597000 | 0.366662000  |
| C         | 5.167496000  | 0.666151000  | 0.829003000  |
| H         | 4.639102000  | 0.050061000  | -1.180366000 |
| H         | 3.939405000  | 1.584835000  | -0.693718000 |
| H         | 6.091286000  | 1.173062000  | 0.529241000  |
| H         | 4.734426000  | 1.223917000  | 1.668422000  |
| H         | 5.437106000  | -0.329918000 | 1.200272000  |
| C         | -0.881276000 | -0.550460000 | -2.097833000 |
| C         | -0.231196000 | 0.038425000  | -3.352362000 |
| H         | -1.767175000 | 0.027384000  | -1.837477000 |
| H         | -1.236450000 | -1.567322000 | -2.307478000 |
| C         | -1.266902000 | 0.223655000  | -4.468231000 |
| H         | 0.204517000  | 1.013991000  | -3.113032000 |
| H         | 0.587197000  | -0.599069000 | -3.712439000 |
| C         | -0.672669000 | 0.859313000  | -5.726703000 |
| H         | -1.715414000 | -0.748044000 | -4.718504000 |
| H         | -2.084777000 | 0.849862000  | -4.086874000 |
| H         | -0.253234000 | 1.848801000  | -5.506148000 |
| H         | 0.136148000  | 0.243128000  | -6.137758000 |
| H         | -1.429078000 | 0.983976000  | -6.509545000 |
| P         | -0.685683000 | 2.441566000  | -0.580918000 |

|   |              |              |              |
|---|--------------|--------------|--------------|
| B | -2.874370000 | 0.964739000  | 0.556788000  |
| O | -3.352721000 | 0.711412000  | -0.709580000 |
| O | -3.826942000 | 0.756647000  | 1.519575000  |
| C | -4.628608000 | 0.033332000  | -0.581232000 |
| C | -5.087217000 | 0.451816000  | 0.866097000  |
| C | -5.529196000 | 0.514087000  | -1.712872000 |
| C | -4.343969000 | -1.465185000 | -0.712905000 |
| C | -5.779012000 | -0.647547000 | 1.665053000  |
| C | -5.920307000 | 1.734380000  | 0.897107000  |
| H | -6.536709000 | 0.094398000  | -1.617434000 |
| H | -5.596533000 | 1.603699000  | -1.728928000 |
| H | -5.114125000 | 0.188359000  | -2.672066000 |
| H | -3.652728000 | -1.801551000 | 0.064883000  |
| H | -5.262313000 | -2.056989000 | -0.649512000 |
| H | -3.877858000 | -1.655527000 | -1.684398000 |
| H | -6.032830000 | -0.268323000 | 2.659534000  |
| H | -6.706065000 | -0.962541000 | 1.173207000  |
| H | -5.132592000 | -1.518517000 | 1.790766000  |
| H | -5.439015000 | 2.531134000  | 0.326436000  |
| H | -6.924529000 | 1.568817000  | 0.493212000  |
| H | -6.012193000 | 2.067211000  | 1.934973000  |
| C | -2.139672000 | 3.419155000  | -1.146365000 |
| C | -2.270602000 | 3.579281000  | -2.533001000 |
| C | -3.121629000 | 3.965138000  | -0.303928000 |
| C | -3.356431000 | 4.267960000  | -3.074479000 |
| H | -1.520800000 | 3.150171000  | -3.192609000 |
| C | -4.206013000 | 4.654997000  | -0.847548000 |
| H | -3.042110000 | 3.833717000  | 0.771220000  |
| C | -4.328804000 | 4.805837000  | -2.230853000 |
| H | -3.444964000 | 4.378941000  | -4.151744000 |
| H | -4.959850000 | 5.074480000  | -0.186396000 |
| H | -5.177573000 | 5.340979000  | -2.647921000 |
| C | 0.348456000  | 3.696820000  | 0.288055000  |
| C | 1.662211000  | 3.321494000  | 0.613626000  |
| C | -0.079394000 | 4.987965000  | 0.624695000  |
| C | 2.517815000  | 4.198343000  | 1.274421000  |
| H | 2.007766000  | 2.327116000  | 0.363741000  |
| C | 0.781792000  | 5.873007000  | 1.275970000  |
| H | -1.086084000 | 5.306702000  | 0.381505000  |
| C | 2.079207000  | 5.481739000  | 1.607564000  |
| H | 3.526814000  | 3.880788000  | 1.524141000  |
| H | 0.432510000  | 6.870490000  | 1.528691000  |
| H | 2.745342000  | 6.172720000  | 2.116766000  |
| C | 0.734381000  | -2.215761000 | 3.707962000  |

|   |              |              |             |
|---|--------------|--------------|-------------|
| C | -0.358874000 | -2.281183000 | 4.570497000 |
| C | -1.506983000 | -1.559988000 | 4.235060000 |
| C | -1.580320000 | -0.830267000 | 3.051962000 |
| C | -0.495225000 | -0.769399000 | 2.142489000 |
| C | 0.674197000  | -1.455804000 | 2.541481000 |
| H | 1.659206000  | -2.731545000 | 3.957433000 |
| H | -0.311814000 | -2.860858000 | 5.487981000 |
| H | -2.370786000 | -1.576620000 | 4.896162000 |
| H | -2.501120000 | -0.309074000 | 2.825725000 |
| H | 1.571607000  | -1.361738000 | 1.944551000 |
| C | -0.592205000 | -0.027817000 | 0.869669000 |
| C | -1.360255000 | 1.318611000  | 0.847636000 |
| C | -1.207598000 | 2.135843000  | 2.118677000 |
| O | -2.025992000 | 2.947044000  | 2.517693000 |
| O | -0.028008000 | 1.939613000  | 2.730675000 |
| C | 0.217613000  | 2.769603000  | 3.871914000 |
| H | -0.535621000 | 2.586473000  | 4.642218000 |
| H | 1.207744000  | 2.484553000  | 4.227667000 |
| H | 0.199002000  | 3.823621000  | 3.584649000 |

**5R**

|   |              |              |              |
|---|--------------|--------------|--------------|
| P | -1.541491000 | -0.934187000 | -0.739851000 |
| C | -3.383537000 | -1.033123000 | -0.931838000 |
| C | -4.244107000 | 0.160017000  | -1.339485000 |
| H | -3.721820000 | -1.414649000 | 0.037415000  |
| H | -3.530109000 | -1.853414000 | -1.644335000 |
| C | -5.731836000 | -0.209841000 | -1.310318000 |
| H | -4.062404000 | 1.001463000  | -0.667768000 |
| H | -3.962251000 | 0.510493000  | -2.335859000 |
| C | -6.629249000 | 0.962395000  | -1.713332000 |
| H | -5.915413000 | -1.062704000 | -1.979635000 |
| H | -6.000417000 | -0.550675000 | -0.300297000 |
| H | -7.689255000 | 0.686873000  | -1.683443000 |
| H | -6.485165000 | 1.815771000  | -1.039852000 |
| H | -6.399204000 | 1.302225000  | -2.730297000 |
| C | -1.335236000 | -2.721036000 | -0.178760000 |
| C | -1.571021000 | -3.818104000 | -1.224108000 |
| H | -2.005640000 | -2.878880000 | 0.671205000  |
| H | -0.323908000 | -2.830971000 | 0.226611000  |
| C | -1.331978000 | -5.219680000 | -0.648662000 |
| H | -2.596751000 | -3.766734000 | -1.611316000 |
| H | -0.911159000 | -3.678422000 | -2.089218000 |
| C | -1.552642000 | -6.328328000 | -1.679942000 |
| H | -0.305995000 | -5.276628000 | -0.258265000 |
| H | -1.994922000 | -5.374520000 | 0.213159000  |

|   |              |              |              |
|---|--------------|--------------|--------------|
| H | -2.580324000 | -6.311914000 | -2.062508000 |
| H | -0.878673000 | -6.209104000 | -2.537010000 |
| H | -1.372821000 | -7.319000000 | -1.248432000 |
| C | -0.575467000 | -0.962823000 | -2.316805000 |
| C | -1.451201000 | -0.956001000 | -3.573359000 |
| H | 0.069193000  | -1.844780000 | -2.299670000 |
| H | 0.067379000  | -0.085421000 | -2.299281000 |
| C | -0.601950000 | -0.954707000 | -4.849216000 |
| H | -2.115478000 | -1.830579000 | -3.588671000 |
| H | -2.086700000 | -0.065854000 | -3.556681000 |
| C | -1.453522000 | -0.940341000 | -6.120565000 |
| H | 0.060160000  | -0.078563000 | -4.835779000 |
| H | 0.054455000  | -1.836429000 | -4.852483000 |
| H | -0.829752000 | -0.932198000 | -7.021126000 |
| H | -2.102585000 | -1.823116000 | -6.170809000 |
| H | -2.097835000 | -0.053621000 | -6.150660000 |
| P | -0.167546000 | 2.616372000  | 1.913955000  |
| B | 0.686914000  | -0.643215000 | 0.865895000  |
| O | 1.326385000  | -1.225570000 | 1.926951000  |
| O | 1.471286000  | -0.617583000 | -0.264068000 |
| C | 2.709466000  | -1.500128000 | 1.552284000  |
| C | 2.669334000  | -1.403363000 | -0.022498000 |
| C | 3.585981000  | -0.432001000 | 2.206110000  |
| C | 3.066810000  | -2.876795000 | 2.103666000  |
| C | 2.474114000  | -2.752732000 | -0.722550000 |
| C | 3.853720000  | -0.676859000 | -0.649872000 |
| H | 4.643000000  | -0.599221000 | 1.976958000  |
| H | 3.313198000  | 0.571441000  | 1.877034000  |
| H | 3.462363000  | -0.483996000 | 3.291599000  |
| H | 3.017226000  | -2.852014000 | 3.196315000  |
| H | 2.377556000  | -3.647506000 | 1.751662000  |
| H | 4.085371000  | -3.158931000 | 1.815660000  |
| H | 1.622125000  | -3.306768000 | -0.321034000 |
| H | 2.293214000  | -2.577518000 | -1.787131000 |
| H | 3.365320000  | -3.380209000 | -0.625628000 |
| H | 3.954123000  | 0.335283000  | -0.259939000 |
| H | 4.784247000  | -1.224487000 | -0.464010000 |
| H | 3.706850000  | -0.614296000 | -1.732897000 |
| C | -0.283406000 | 1.731753000  | 3.535822000  |
| C | 0.734407000  | 0.960408000  | 4.110645000  |
| C | -1.480842000 | 1.885073000  | 4.252190000  |
| C | 0.556866000  | 0.345240000  | 5.349345000  |
| H | 1.671042000  | 0.837826000  | 3.587189000  |
| C | -1.670271000 | 1.256471000  | 5.480424000  |



|           |              |              |              |
|-----------|--------------|--------------|--------------|
| H         | -2.275204000 | 2.494288000  | 3.830269000  |
| C         | -0.648930000 | 0.483383000  | 6.035582000  |
| H         | 1.360202000  | -0.253310000 | 5.772310000  |
| H         | -2.614304000 | 1.371829000  | 6.005779000  |
| H         | -0.792038000 | -0.002908000 | 6.996976000  |
| C         | 1.663291000  | 2.754213000  | 1.668498000  |
| C         | 2.502984000  | 3.220967000  | 2.695352000  |
| C         | 2.212681000  | 2.594840000  | 0.387722000  |
| C         | 3.852555000  | 3.476793000  | 2.459157000  |
| H         | 2.097937000  | 3.373006000  | 3.691867000  |
| C         | 3.558341000  | 2.875248000  | 0.144653000  |
| H         | 1.576746000  | 2.240463000  | -0.416664000 |
| C         | 4.388962000  | 3.305215000  | 1.180453000  |
| H         | 4.486545000  | 3.817181000  | 3.274094000  |
| H         | 3.959559000  | 2.753346000  | -0.858716000 |
| H         | 5.438538000  | 3.514755000  | 0.992934000  |
| C         | -2.429806000 | -1.872699000 | 3.850073000  |
| C         | -3.677456000 | -1.253834000 | 3.891029000  |
| C         | -3.967746000 | -0.243512000 | 2.971929000  |
| C         | -3.016720000 | 0.132014000  | 2.028316000  |
| C         | -1.768933000 | -0.505119000 | 1.954057000  |
| C         | -1.487441000 | -1.511539000 | 2.884530000  |
| H         | -2.178918000 | -2.640761000 | 4.576616000  |
| H         | -4.409381000 | -1.542134000 | 4.640520000  |
| H         | -4.928707000 | 0.263634000  | 3.000035000  |
| H         | -3.219574000 | 0.950333000  | 1.346041000  |
| H         | -0.520485000 | -1.996624000 | 2.873297000  |
| C         | -0.808205000 | -0.088951000 | 0.826192000  |
| C         | -0.732365000 | 1.430322000  | 0.666371000  |
| C         | -1.223756000 | 1.927582000  | -0.528287000 |
| O         | -1.735723000 | 1.201422000  | -1.445544000 |
| O         | -1.126772000 | 3.272859000  | -0.751869000 |
| C         | -1.777892000 | 3.760972000  | -1.920361000 |
| H         | -1.381515000 | 3.287911000  | -2.824158000 |
| H         | -2.858704000 | 3.584536000  | -1.880059000 |
| H         | -1.577971000 | 4.833990000  | -1.937568000 |
| <b>5S</b> |              |              |              |
| P         | -1.889937000 | -0.062648000 | 0.052215000  |
| C         | -3.174353000 | 0.039111000  | -1.282526000 |
| C         | -3.495716000 | 1.329154000  | -2.033273000 |
| H         | -2.863731000 | -0.732457000 | -1.995039000 |
| H         | -4.084393000 | -0.343097000 | -0.805317000 |
| C         | -4.534739000 | 1.070695000  | -3.130718000 |
| H         | -2.588078000 | 1.742303000  | -2.478624000 |

|   |              |              |              |
|---|--------------|--------------|--------------|
| H | -3.860317000 | 2.091964000  | -1.340290000 |
| C | -4.882565000 | 2.339120000  | -3.912946000 |
| H | -5.447625000 | 0.649573000  | -2.685420000 |
| H | -4.150165000 | 0.305723000  | -3.820274000 |
| H | -5.618497000 | 2.137951000  | -4.699316000 |
| H | -3.990101000 | 2.762717000  | -4.389005000 |
| H | -5.299969000 | 3.107817000  | -3.251504000 |
| C | -2.096314000 | -1.914523000 | 0.338441000  |
| C | -3.408992000 | -2.392619000 | 0.970560000  |
| H | -1.954783000 | -2.415324000 | -0.623678000 |
| H | -1.262006000 | -2.248840000 | 0.963711000  |
| C | -3.404644000 | -3.906769000 | 1.216635000  |
| H | -4.259478000 | -2.143630000 | 0.323056000  |
| H | -3.592307000 | -1.883076000 | 1.925104000  |
| C | -4.708859000 | -4.412021000 | 1.836688000  |
| H | -2.560130000 | -4.160293000 | 1.873127000  |
| H | -3.218375000 | -4.426077000 | 0.266863000  |
| H | -5.563853000 | -4.199894000 | 1.183411000  |
| H | -4.901529000 | -3.927077000 | 2.801495000  |
| H | -4.678986000 | -5.493812000 | 2.006593000  |
| C | -2.398744000 | 0.580523000  | 1.709777000  |
| C | -3.793687000 | 1.212711000  | 1.716632000  |
| H | -2.347446000 | -0.248317000 | 2.419900000  |
| H | -1.647431000 | 1.310970000  | 2.002515000  |
| C | -4.173547000 | 1.722193000  | 3.111074000  |
| H | -4.548564000 | 0.486939000  | 1.384851000  |
| H | -3.808009000 | 2.043146000  | 1.004470000  |
| C | -5.563982000 | 2.360001000  | 3.145665000  |
| H | -3.421676000 | 2.451165000  | 3.442089000  |
| H | -4.130871000 | 0.889618000  | 3.827644000  |
| H | -5.814266000 | 2.721345000  | 4.149145000  |
| H | -6.335789000 | 1.639985000  | 2.847205000  |
| H | -5.622691000 | 3.212192000  | 2.458161000  |
| P | 2.196971000  | 1.753145000  | -1.182624000 |
| B | 0.676812000  | -0.690934000 | 0.858641000  |
| O | 1.527326000  | -1.761854000 | 0.919763000  |
| O | 0.409500000  | -0.167117000 | 2.103000000  |
| C | 2.004141000  | -1.907647000 | 2.290824000  |
| C | 0.963987000  | -1.052676000 | 3.112902000  |
| C | 3.426755000  | -1.351004000 | 2.345411000  |
| C | 2.013629000  | -3.398050000 | 2.614712000  |
| C | -0.198194000 | -1.872018000 | 3.685243000  |
| C | 1.569031000  | -0.201395000 | 4.223638000  |
| H | 3.850384000  | -1.456174000 | 3.349029000  |

|   |              |              |              |
|---|--------------|--------------|--------------|
| H | 3.459668000  | -0.297684000 | 2.063452000  |
| H | 4.057156000  | -1.913475000 | 1.650651000  |
| H | 2.731344000  | -3.904776000 | 1.962713000  |
| H | 1.033847000  | -3.854228000 | 2.457013000  |
| H | 2.317861000  | -3.568733000 | 3.653119000  |
| H | -0.685810000 | -2.487502000 | 2.925302000  |
| H | -0.946006000 | -1.188315000 | 4.097646000  |
| H | 0.142373000  | -2.530731000 | 4.489934000  |
| H | 2.332462000  | 0.475886000  | 3.843210000  |
| H | 2.011732000  | -0.838280000 | 4.997539000  |
| H | 0.780223000  | 0.398683000  | 4.688470000  |
| C | 2.877197000  | 0.230889000  | -1.987209000 |
| C | 3.553043000  | -0.800986000 | -1.323821000 |
| C | 2.719760000  | 0.130464000  | -3.378454000 |
| C | 4.040581000  | -1.904978000 | -2.022061000 |
| H | 3.697316000  | -0.744556000 | -0.254942000 |
| C | 3.187788000  | -0.979695000 | -4.077343000 |
| H | 2.210272000  | 0.928000000  | -3.912176000 |
| C | 3.853238000  | -2.002973000 | -3.400249000 |
| H | 4.557451000  | -2.695973000 | -1.483866000 |
| H | 3.035466000  | -1.045080000 | -5.151163000 |
| H | 4.225061000  | -2.867152000 | -3.944421000 |
| C | 3.194342000  | 1.853352000  | 0.374818000  |
| C | 4.593905000  | 1.718245000  | 0.353531000  |
| C | 2.590313000  | 2.283913000  | 1.565137000  |
| C | 5.356542000  | 1.963062000  | 1.494155000  |
| H | 5.088851000  | 1.407666000  | -0.562249000 |
| C | 3.356120000  | 2.554039000  | 2.700447000  |
| H | 1.511902000  | 2.397268000  | 1.595510000  |
| C | 4.741049000  | 2.383245000  | 2.675964000  |
| H | 6.435213000  | 1.832238000  | 1.458944000  |
| H | 2.866858000  | 2.895539000  | 3.609596000  |
| H | 5.335674000  | 2.585127000  | 3.562745000  |
| C | 0.319586000  | -2.974352000 | -2.997392000 |
| C | -0.147825000 | -2.361807000 | -4.158319000 |
| C | -0.528603000 | -1.019152000 | -4.114319000 |
| C | -0.442237000 | -0.311218000 | -2.919730000 |
| C | -0.005809000 | -0.923948000 | -1.735534000 |
| C | 0.381573000  | -2.267294000 | -1.794519000 |
| H | 0.646449000  | -4.010385000 | -3.022431000 |
| H | -0.198681000 | -2.917792000 | -5.090438000 |
| H | -0.878008000 | -0.518290000 | -5.013467000 |
| H | -0.689855000 | 0.744373000  | -2.893115000 |
| H | 0.756075000  | -2.756515000 | -0.905243000 |

|           |              |              |              |
|-----------|--------------|--------------|--------------|
| C         | -0.028189000 | -0.092612000 | -0.440825000 |
| C         | 0.519331000  | 1.319353000  | -0.655180000 |
| C         | -0.403242000 | 2.338910000  | -0.502966000 |
| O         | -1.635526000 | 2.145524000  | -0.223993000 |
| O         | 0.031398000  | 3.628159000  | -0.628129000 |
| C         | -0.976385000 | 4.633813000  | -0.599549000 |
| H         | -1.535475000 | 4.610562000  | 0.341091000  |
| H         | -1.683691000 | 4.516554000  | -1.428253000 |
| H         | -0.443697000 | 5.581535000  | -0.697954000 |
| <b>6R</b> |              |              |              |
| P         | 1.035677000  | -0.521560000 | -0.326613000 |
| C         | 1.276668000  | 1.164711000  | -0.988320000 |
| C         | 1.749804000  | 2.212778000  | 0.034605000  |
| H         | 0.316178000  | 1.466492000  | -1.407793000 |
| H         | 1.981593000  | 1.084990000  | -1.824483000 |
| C         | 1.342417000  | 3.626738000  | -0.396272000 |
| H         | 1.329849000  | 2.007144000  | 1.022614000  |
| H         | 2.840471000  | 2.151278000  | 0.144895000  |
| C         | 1.834148000  | 4.696890000  | 0.578827000  |
| H         | 1.727503000  | 3.832327000  | -1.404433000 |
| H         | 0.250116000  | 3.669350000  | -0.470940000 |
| H         | 2.929189000  | 4.707861000  | 0.645005000  |
| H         | 1.506366000  | 5.695552000  | 0.270156000  |
| H         | 1.445227000  | 4.513436000  | 1.587859000  |
| C         | 0.969573000  | -1.631490000 | -1.794083000 |
| C         | -0.249144000 | -1.433489000 | -2.702653000 |
| H         | 0.985423000  | -2.657624000 | -1.415446000 |
| H         | 1.903423000  | -1.474486000 | -2.344564000 |
| C         | -0.382277000 | -2.541490000 | -3.755006000 |
| H         | -1.161221000 | -1.402908000 | -2.100760000 |
| H         | -0.174991000 | -0.459516000 | -3.201978000 |
| C         | 0.790541000  | -2.622190000 | -4.736318000 |
| H         | -0.504836000 | -3.503877000 | -3.239767000 |
| H         | -1.311792000 | -2.371742000 | -4.312404000 |
| H         | 1.728708000  | -2.880976000 | -4.231550000 |
| H         | 0.612513000  | -3.384018000 | -5.502946000 |
| H         | 0.941972000  | -1.663365000 | -5.248230000 |
| C         | 2.596174000  | -0.962201000 | 0.537264000  |
| C         | 3.868199000  | -0.778468000 | -0.300132000 |
| H         | 2.507553000  | -1.999130000 | 0.875678000  |
| H         | 2.618351000  | -0.368786000 | 1.454208000  |
| C         | 5.124109000  | -1.114718000 | 0.513206000  |
| H         | 3.839726000  | -1.414334000 | -1.194654000 |
| H         | 3.941045000  | 0.256630000  | -0.656291000 |

|   |              |              |              |
|---|--------------|--------------|--------------|
| C | 6.413845000  | -0.929686000 | -0.288572000 |
| H | 5.148429000  | -0.481228000 | 1.409767000  |
| H | 5.054212000  | -2.150503000 | 0.872194000  |
| H | 7.295229000  | -1.173080000 | 0.314301000  |
| H | 6.426171000  | -1.575940000 | -1.174640000 |
| H | 6.519675000  | 0.106400000  | -0.632097000 |
| P | -2.583695000 | 0.795620000  | -0.947084000 |
| B | -0.211970000 | -0.283701000 | 2.378388000  |
| O | 1.051110000  | -0.630529000 | 2.956012000  |
| O | -1.244216000 | -0.869650000 | 3.179730000  |
| C | 0.825456000  | -1.355484000 | 4.177379000  |
| C | -0.697367000 | -1.077341000 | 4.483277000  |
| C | 1.115650000  | -2.837251000 | 3.909982000  |
| C | 1.795843000  | -0.829614000 | 5.234372000  |
| C | -0.914305000 | 0.195991000  | 5.318224000  |
| C | -1.440766000 | -2.243945000 | 5.131210000  |
| H | 1.070908000  | -3.432597000 | 4.828445000  |
| H | 0.405535000  | -3.251183000 | 3.191739000  |
| H | 2.124891000  | -2.930282000 | 3.492800000  |
| H | 1.617672000  | -1.305454000 | 6.205802000  |
| H | 2.825178000  | -1.053043000 | 4.932540000  |
| H | 1.706376000  | 0.252424000  | 5.351892000  |
| H | -0.585594000 | 0.067371000  | 6.355618000  |
| H | -0.388765000 | 1.048275000  | 4.881729000  |
| H | -1.984771000 | 0.426709000  | 5.321377000  |
| H | -1.433310000 | -3.123482000 | 4.484123000  |
| H | -1.000123000 | -2.508901000 | 6.099527000  |
| H | -2.485172000 | -1.960801000 | 5.298521000  |
| C | -4.153958000 | 1.212281000  | -0.062451000 |
| C | -5.220980000 | 1.754505000  | -0.797298000 |
| C | -4.358278000 | 0.913840000  | 1.292939000  |
| C | -6.449013000 | 2.012155000  | -0.191721000 |
| H | -5.083175000 | 1.990107000  | -1.849624000 |
| C | -5.593415000 | 1.160817000  | 1.894806000  |
| H | -3.550551000 | 0.488485000  | 1.881311000  |
| C | -6.641010000 | 1.714752000  | 1.159525000  |
| H | -7.258403000 | 2.442477000  | -0.775931000 |
| H | -5.731645000 | 0.923215000  | 2.946490000  |
| H | -7.599548000 | 1.911208000  | 1.632112000  |
| C | -2.187546000 | 2.420075000  | -1.761218000 |
| C | -2.554167000 | 3.680165000  | -1.262674000 |
| C | -1.460169000 | 2.370006000  | -2.960662000 |
| C | -2.162878000 | 4.846433000  | -1.918228000 |
| H | -3.140660000 | 3.740669000  | -0.354940000 |

|           |              |              |              |
|-----------|--------------|--------------|--------------|
| C         | -1.054696000 | 3.536023000  | -3.612374000 |
| H         | -1.217333000 | 1.402936000  | -3.392818000 |
| C         | -1.399972000 | 4.780426000  | -3.087042000 |
| H         | -2.451120000 | 5.813202000  | -1.513151000 |
| H         | -0.484013000 | 3.470596000  | -4.535105000 |
| H         | -1.091376000 | 5.692371000  | -3.590823000 |
| C         | -0.892725000 | -4.410487000 | 0.642804000  |
| C         | -2.269904000 | -4.575809000 | 0.498892000  |
| C         | -3.080542000 | -3.442835000 | 0.441984000  |
| C         | -2.525660000 | -2.165005000 | 0.501430000  |
| C         | -1.141931000 | -1.977011000 | 0.613608000  |
| C         | -0.345459000 | -3.130056000 | 0.707227000  |
| H         | -0.240034000 | -5.276267000 | 0.718913000  |
| H         | -2.703944000 | -5.570153000 | 0.446197000  |
| H         | -4.158491000 | -3.546630000 | 0.353156000  |
| H         | -3.187410000 | -1.311219000 | 0.486323000  |
| H         | 0.722661000  | -3.032340000 | 0.865965000  |
| C         | -0.525760000 | -0.593707000 | 0.723968000  |
| C         | -1.394634000 | 0.625481000  | 0.406705000  |
| C         | -1.173109000 | 1.563465000  | 1.387947000  |
| O         | -0.367780000 | 1.275187000  | 2.380075000  |
| O         | -1.731390000 | 2.782393000  | 1.378927000  |
| C         | -1.624029000 | 3.554934000  | 2.579928000  |
| H         | -0.578734000 | 3.765965000  | 2.817946000  |
| H         | -2.159917000 | 4.481689000  | 2.371058000  |
| H         | -2.086922000 | 3.029416000  | 3.419550000  |
| <b>6S</b> |              |              |              |
| P         | 1.010379000  | 0.426296000  | 0.311673000  |
| C         | 1.105622000  | -1.331806000 | -0.173999000 |
| C         | 2.454547000  | -1.756227000 | -0.763902000 |
| H         | 0.304157000  | -1.519753000 | -0.892343000 |
| H         | 0.864876000  | -1.881631000 | 0.739899000  |
| C         | 2.494696000  | -3.267085000 | -1.023144000 |
| H         | 2.636923000  | -1.223097000 | -1.706384000 |
| H         | 3.277635000  | -1.484963000 | -0.088588000 |
| C         | 3.817515000  | -3.726696000 | -1.638499000 |
| H         | 2.319812000  | -3.795632000 | -0.076543000 |
| H         | 1.660149000  | -3.538771000 | -1.682680000 |
| H         | 4.663289000  | -3.490349000 | -0.981282000 |
| H         | 3.820804000  | -4.808258000 | -1.810965000 |
| H         | 3.998124000  | -3.234585000 | -2.601887000 |
| C         | 2.271856000  | 0.688961000  | 1.637516000  |
| C         | 3.308917000  | 1.797717000  | 1.427352000  |
| H         | 2.771943000  | -0.273715000 | 1.783580000  |

|   |              |              |              |
|---|--------------|--------------|--------------|
| H | 1.695773000  | 0.883117000  | 2.543433000  |
| C | 4.196289000  | 1.965716000  | 2.666373000  |
| H | 3.942103000  | 1.579173000  | 0.558137000  |
| H | 2.805803000  | 2.749189000  | 1.219591000  |
| C | 5.256060000  | 3.054229000  | 2.485135000  |
| H | 3.561844000  | 2.204663000  | 3.530203000  |
| H | 4.683072000  | 1.008110000  | 2.898808000  |
| H | 4.790515000  | 4.025326000  | 2.278850000  |
| H | 5.873853000  | 3.163096000  | 3.382963000  |
| H | 5.922569000  | 2.820737000  | 1.646087000  |
| C | 1.585927000  | 1.463933000  | -1.092222000 |
| C | 0.794743000  | 1.400498000  | -2.398977000 |
| H | 2.633182000  | 1.189491000  | -1.266922000 |
| H | 1.588001000  | 2.490628000  | -0.713221000 |
| C | 1.355918000  | 2.372236000  | -3.441424000 |
| H | 0.789255000  | 0.379546000  | -2.797268000 |
| H | -0.250008000 | 1.647027000  | -2.201122000 |
| C | 0.549338000  | 2.355142000  | -4.741768000 |
| H | 1.354480000  | 3.386815000  | -3.019889000 |
| H | 2.406445000  | 2.125571000  | -3.651435000 |
| H | 0.536337000  | 1.352967000  | -5.186167000 |
| H | -0.491439000 | 2.648980000  | -4.560052000 |
| H | 0.966925000  | 3.046396000  | -5.481960000 |
| P | -2.040304000 | -0.424035000 | -1.354518000 |
| B | -0.782884000 | 0.329062000  | 2.506979000  |
| O | -0.164947000 | -0.987212000 | 2.620274000  |
| O | -0.289661000 | 1.091174000  | 3.610928000  |
| C | 0.054927000  | -1.252023000 | 4.009341000  |
| C | -0.081741000 | 0.188510000  | 4.707141000  |
| C | -0.996423000 | -2.271371000 | 4.471078000  |
| C | 1.440990000  | -1.891746000 | 4.147502000  |
| C | 1.172486000  | 0.655085000  | 5.451915000  |
| C | -1.284691000 | 0.309361000  | 5.654286000  |
| H | -0.866838000 | -3.195171000 | 3.896787000  |
| H | -0.894146000 | -2.514573000 | 5.534550000  |
| H | -2.005900000 | -1.900967000 | 4.287484000  |
| H | 2.233655000  | -1.233137000 | 3.787617000  |
| H | 1.661398000  | -2.158252000 | 5.186855000  |
| H | 1.468494000  | -2.809302000 | 3.549715000  |
| H | 1.378083000  | 0.027842000  | 6.326167000  |
| H | 2.057415000  | 0.650869000  | 4.810940000  |
| H | 1.015155000  | 1.681544000  | 5.798284000  |
| H | -2.219147000 | 0.097868000  | 5.132577000  |
| H | -1.195047000 | -0.360095000 | 6.516955000  |

|   |              |              |              |
|---|--------------|--------------|--------------|
| H | -1.335811000 | 1.338750000  | 6.022917000  |
| C | -2.555849000 | -2.182801000 | -1.123117000 |
| C | -3.257095000 | -2.848324000 | -2.140840000 |
| C | -2.136321000 | -2.924690000 | -0.006673000 |
| C | -3.549915000 | -4.207790000 | -2.037678000 |
| H | -3.590195000 | -2.294782000 | -3.014490000 |
| C | -2.424945000 | -4.285772000 | 0.091425000  |
| H | -1.595641000 | -2.432937000 | 0.796484000  |
| C | -3.135051000 | -4.934181000 | -0.920114000 |
| H | -4.105124000 | -4.699802000 | -2.832290000 |
| H | -2.097842000 | -4.839349000 | 0.968374000  |
| H | -3.363373000 | -5.993452000 | -0.839186000 |
| C | -3.569563000 | 0.353422000  | -2.053523000 |
| C | -3.387852000 | 1.367721000  | -3.005753000 |
| C | -4.878615000 | 0.008818000  | -1.683031000 |
| C | -4.478986000 | 2.044003000  | -3.554036000 |
| H | -2.380449000 | 1.623662000  | -3.324422000 |
| C | -5.969495000 | 0.674079000  | -2.239310000 |
| H | -5.032876000 | -0.778187000 | -0.955439000 |
| C | -5.774000000 | 1.697703000  | -3.170223000 |
| H | -4.317218000 | 2.829824000  | -4.287312000 |
| H | -6.977881000 | 0.397543000  | -1.941935000 |
| H | -6.627619000 | 2.216923000  | -3.597573000 |
| C | 0.064137000  | 4.662407000  | 1.423036000  |
| C | -0.677029000 | 5.236847000  | 0.389737000  |
| C | -1.463005000 | 4.416522000  | -0.420708000 |
| C | -1.485270000 | 3.037169000  | -0.216217000 |
| C | -0.719214000 | 2.442243000  | 0.795732000  |
| C | 0.040702000  | 3.281983000  | 1.627377000  |
| H | 0.654111000  | 5.290884000  | 2.085350000  |
| H | -0.657501000 | 6.311484000  | 0.230483000  |
| H | -2.066984000 | 4.847886000  | -1.214756000 |
| H | -2.119746000 | 2.416314000  | -0.836781000 |
| H | 0.575158000  | 2.852746000  | 2.465486000  |
| C | -0.651103000 | 0.917323000  | 0.939153000  |
| C | -1.846597000 | 0.167884000  | 0.330659000  |
| C | -2.713215000 | -0.095341000 | 1.364286000  |
| O | -2.327729000 | 0.154367000  | 2.592988000  |
| O | -3.935319000 | -0.614641000 | 1.181522000  |
| C | -4.570052000 | -1.202360000 | 2.322419000  |
| H | -5.548599000 | -1.530224000 | 1.969322000  |
| H | -3.996028000 | -2.063235000 | 2.678526000  |
| H | -4.679341000 | -0.474415000 | 3.129292000  |

7Z



|   |              |              |              |
|---|--------------|--------------|--------------|
| P | 0.262945000  | -1.121388000 | 2.146122000  |
| B | 0.172112000  | -0.140047000 | -2.098799000 |
| O | 0.156555000  | 1.153258000  | -2.563906000 |
| O | 0.348193000  | -1.078696000 | -3.081727000 |
| C | 0.632740000  | 1.110276000  | -3.939716000 |
| C | 0.322152000  | -0.376095000 | -4.354910000 |
| C | -0.119754000 | 2.168988000  | -4.737541000 |
| C | 2.128489000  | 1.435015000  | -3.903915000 |
| C | 1.355166000  | -1.011915000 | -5.277254000 |
| C | -1.089848000 | -0.566385000 | -4.917532000 |
| H | 0.164089000  | 2.131535000  | -5.795257000 |
| H | -1.201335000 | 2.038295000  | -4.661733000 |
| H | 0.131129000  | 3.162736000  | -4.353861000 |
| H | 2.262340000  | 2.414116000  | -3.433761000 |
| H | 2.676836000  | 0.700870000  | -3.311085000 |
| H | 2.550998000  | 1.476286000  | -4.913239000 |
| H | 1.413478000  | -0.470820000 | -6.228494000 |
| H | 2.344615000  | -1.021289000 | -4.816142000 |
| H | 1.068784000  | -2.046429000 | -5.490543000 |
| H | -1.195446000 | -0.117306000 | -5.910403000 |
| H | -1.295071000 | -1.637859000 | -4.997755000 |
| H | -1.840991000 | -0.130204000 | -4.251889000 |
| C | 1.585190000  | -0.039132000 | 2.869397000  |
| C | 2.163495000  | -0.448129000 | 4.076645000  |
| C | 2.018272000  | 1.160793000  | 2.285827000  |
| C | 3.147860000  | 0.325414000  | 4.694362000  |
| H | 1.844925000  | -1.382902000 | 4.530590000  |
| C | 3.009933000  | 1.927911000  | 2.894771000  |
| H | 1.591046000  | 1.492378000  | 1.344008000  |
| C | 3.575471000  | 1.513783000  | 4.103138000  |
| H | 3.585577000  | -0.005285000 | 5.632426000  |
| H | 3.339298000  | 2.851984000  | 2.427140000  |
| H | 4.346683000  | 2.113773000  | 4.578230000  |
| C | -1.213911000 | -0.093020000 | 2.576512000  |
| C | -2.117368000 | -0.640701000 | 3.494662000  |
| C | -1.455719000 | 1.191622000  | 2.073071000  |
| C | -3.246176000 | 0.074463000  | 3.897745000  |
| H | -1.940137000 | -1.639364000 | 3.885858000  |
| C | -2.586643000 | 1.902204000  | 2.464420000  |
| H | -0.772101000 | 1.626372000  | 1.351746000  |
| C | -3.485449000 | 1.345231000  | 3.377941000  |
| H | -3.940462000 | -0.364882000 | 4.608885000  |
| H | -2.771533000 | 2.890637000  | 2.052909000  |
| H | -4.368721000 | 1.901215000  | 3.680100000  |

|           |              |              |              |
|-----------|--------------|--------------|--------------|
| C         | -3.853188000 | -1.572970000 | 0.296145000  |
| C         | -4.618391000 | -0.562254000 | -0.287730000 |
| C         | -3.987060000 | 0.453679000  | -1.007367000 |
| C         | -2.600891000 | 0.464612000  | -1.136714000 |
| C         | -1.817579000 | -0.526099000 | -0.517976000 |
| C         | -2.466622000 | -1.555723000 | 0.181059000  |
| H         | -4.336818000 | -2.373620000 | 0.848318000  |
| H         | -5.700167000 | -0.570869000 | -0.188663000 |
| H         | -4.576613000 | 1.240459000  | -1.470033000 |
| H         | -2.107821000 | 1.257125000  | -1.689743000 |
| H         | -1.875725000 | -2.349528000 | 0.627451000  |
| C         | -0.347479000 | -0.496145000 | -0.647687000 |
| C         | 0.536102000  | -0.773683000 | 0.346606000  |
| C         | 1.951566000  | -0.855198000 | -0.111482000 |
| O         | 2.372738000  | -0.341467000 | -1.137328000 |
| O         | 2.727698000  | -1.576059000 | 0.712942000  |
| C         | 4.128923000  | -1.591663000 | 0.405020000  |
| H         | 4.295572000  | -1.981212000 | -0.601804000 |
| H         | 4.535157000  | -0.579194000 | 0.476370000  |
| H         | 4.582670000  | -2.239365000 | 1.154474000  |
| <b>7E</b> |              |              |              |
| P         | -0.444124000 | 0.959637000  | -1.383783000 |
| B         | -0.097940000 | 1.051480000  | 1.671884000  |
| O         | -0.728467000 | 2.175374000  | 2.122581000  |
| O         | 1.264030000  | 1.083917000  | 1.815976000  |
| C         | 0.276703000  | 2.975499000  | 2.815622000  |
| C         | 1.618863000  | 2.448828000  | 2.190432000  |
| C         | -0.017683000 | 4.447275000  | 2.558755000  |
| C         | 0.132359000  | 2.646614000  | 4.303696000  |
| C         | 2.801112000  | 2.390952000  | 3.149006000  |
| C         | 2.012992000  | 3.163702000  | 0.895650000  |
| H         | -0.979734000 | 4.713614000  | 3.006736000  |
| H         | 0.755824000  | 5.079536000  | 3.008831000  |
| H         | -0.068847000 | 4.662004000  | 1.489802000  |
| H         | -0.894033000 | 2.860630000  | 4.615187000  |
| H         | 0.328188000  | 1.586868000  | 4.493794000  |
| H         | 0.813910000  | 3.244883000  | 4.916644000  |
| H         | 2.592316000  | 1.751176000  | 4.009143000  |
| H         | 3.673614000  | 1.986347000  | 2.627110000  |
| H         | 3.054432000  | 3.393565000  | 3.510926000  |
| H         | 2.809310000  | 2.597099000  | 0.405641000  |
| H         | 1.168908000  | 3.217801000  | 0.202626000  |
| H         | 2.372953000  | 4.178346000  | 1.094719000  |
| C         | 1.344428000  | 0.558921000  | -1.596519000 |

|          |              |              |              |
|----------|--------------|--------------|--------------|
| C        | 1.995925000  | -0.507290000 | -0.966628000 |
| C        | 2.096320000  | 1.445144000  | -2.384001000 |
| C        | 3.371609000  | -0.682058000 | -1.121790000 |
| H        | 1.429226000  | -1.196908000 | -0.353075000 |
| C        | 3.467998000  | 1.263358000  | -2.547602000 |
| H        | 1.603476000  | 2.285997000  | -2.866811000 |
| C        | 4.111185000  | 0.199502000  | -1.910431000 |
| H        | 3.865676000  | -1.511764000 | -0.623432000 |
| H        | 4.036035000  | 1.956265000  | -3.162418000 |
| H        | 5.182539000  | 0.061192000  | -2.027179000 |
| C        | -1.157973000 | 0.355061000  | -2.974409000 |
| C        | -0.479157000 | -0.509640000 | -3.844329000 |
| C        | -2.458755000 | 0.764794000  | -3.299891000 |
| C        | -1.093252000 | -0.956727000 | -5.014118000 |
| H        | 0.525410000  | -0.837287000 | -3.599320000 |
| C        | -3.075794000 | 0.308604000  | -4.463578000 |
| H        | -2.992382000 | 1.436469000  | -2.632675000 |
| C        | -2.393256000 | -0.552063000 | -5.324236000 |
| H        | -0.556562000 | -1.624558000 | -5.682920000 |
| H        | -4.087411000 | 0.626750000  | -4.699072000 |
| H        | -2.870735000 | -0.903571000 | -6.234704000 |
| C        | -2.791092000 | -2.799130000 | 3.105069000  |
| C        | -1.876433000 | -3.106683000 | 4.113402000  |
| C        | -0.635208000 | -2.468482000 | 4.135240000  |
| C        | -0.313647000 | -1.530982000 | 3.156636000  |
| C        | -1.219657000 | -1.229642000 | 2.123548000  |
| C        | -2.470774000 | -1.869218000 | 2.117486000  |
| H        | -3.765252000 | -3.280221000 | 3.088986000  |
| H        | -2.131789000 | -3.832458000 | 4.880445000  |
| H        | 0.083308000  | -2.698620000 | 4.917260000  |
| H        | 0.654521000  | -1.038683000 | 3.171877000  |
| H        | -3.191470000 | -1.623897000 | 1.346760000  |
| C        | -0.840352000 | -0.214188000 | 1.108132000  |
| C        | -1.027597000 | -0.361312000 | -0.220219000 |
| C        | -1.674399000 | -1.553337000 | -0.849441000 |
| O        | -2.865724000 | -1.697287000 | -1.028022000 |
| O        | -0.744950000 | -2.436676000 | -1.271804000 |
| C        | -1.260043000 | -3.548149000 | -2.024468000 |
| H        | -1.976478000 | -4.115254000 | -1.425549000 |
| H        | -1.748405000 | -3.187751000 | -2.933221000 |
| H        | -0.391271000 | -4.159281000 | -2.269605000 |
| <b>8</b> |              |              |              |
| P        | -0.862868000 | -2.376632000 | 0.504291000  |
| C        | -0.346256000 | -1.688787000 | 2.114576000  |

|   |              |              |              |
|---|--------------|--------------|--------------|
| C | -1.247519000 | -0.602346000 | 2.709969000  |
| H | 0.647281000  | -1.261518000 | 1.920402000  |
| H | -0.232120000 | -2.535876000 | 2.803681000  |
| C | -0.716032000 | -0.143027000 | 4.073000000  |
| H | -1.282550000 | 0.244647000  | 2.013993000  |
| H | -2.273286000 | -0.976187000 | 2.837071000  |
| C | -1.524047000 | 1.018714000  | 4.652632000  |
| H | -0.726224000 | -0.990667000 | 4.773009000  |
| H | 0.331606000  | 0.160270000  | 3.964144000  |
| H | -1.125981000 | 1.332232000  | 5.623676000  |
| H | -1.496811000 | 1.884805000  | 3.982308000  |
| H | -2.576645000 | 0.743080000  | 4.793247000  |
| C | -2.257308000 | -3.535158000 | 0.750700000  |
| C | -2.643339000 | -4.262045000 | -0.549870000 |
| H | -3.093967000 | -2.937670000 | 1.123716000  |
| H | -1.991743000 | -4.248097000 | 1.540061000  |
| C | -4.031629000 | -4.915412000 | -0.484667000 |
| H | -2.631425000 | -3.552538000 | -1.385980000 |
| H | -1.883142000 | -5.021514000 | -0.769232000 |
| C | -5.180601000 | -3.902303000 | -0.467073000 |
| H | -4.143021000 | -5.569612000 | -1.358485000 |
| H | -4.089690000 | -5.568780000 | 0.397092000  |
| H | -5.154641000 | -3.261470000 | 0.420521000  |
| H | -5.136094000 | -3.241524000 | -1.340096000 |
| H | -6.149715000 | -4.412589000 | -0.474502000 |
| C | 0.576840000  | -3.291305000 | -0.141264000 |
| C | 1.143365000  | -4.363706000 | 0.795164000  |
| H | 1.314768000  | -2.510200000 | -0.356185000 |
| H | 0.282116000  | -3.718833000 | -1.105900000 |
| C | 2.378953000  | -5.041611000 | 0.191229000  |
| H | 1.418237000  | -3.913905000 | 1.757025000  |
| H | 0.380541000  | -5.125228000 | 1.010379000  |
| C | 2.969860000  | -6.113714000 | 1.108665000  |
| H | 2.110560000  | -5.485755000 | -0.776968000 |
| H | 3.135705000  | -4.274764000 | -0.021010000 |
| H | 2.240263000  | -6.907038000 | 1.311774000  |
| H | 3.852563000  | -6.579259000 | 0.657804000  |
| H | 3.272929000  | -5.685250000 | 2.071320000  |
| P | 1.910537000  | 0.743082000  | 0.560408000  |
| B | 0.565209000  | 1.978871000  | -0.315643000 |
| O | -0.728636000 | 1.857907000  | 0.302463000  |
| O | 0.899802000  | 3.362313000  | -0.372385000 |
| C | -1.429352000 | 3.088927000  | 0.055940000  |
| C | -0.259294000 | 4.154374000  | -0.085074000 |

|   |              |              |              |
|---|--------------|--------------|--------------|
| C | -2.269031000 | 2.924675000  | -1.222160000 |
| C | -2.376415000 | 3.328206000  | 1.231608000  |
| C | 0.020748000  | 4.942111000  | 1.200084000  |
| C | -0.454201000 | 5.146751000  | -1.235969000 |
| H | -2.962242000 | 2.090439000  | -1.086265000 |
| H | -2.854180000 | 3.825321000  | -1.438705000 |
| H | -1.639057000 | 2.703010000  | -2.085521000 |
| H | -3.107229000 | 2.513293000  | 1.275416000  |
| H | -1.837780000 | 3.355118000  | 2.181488000  |
| H | -2.924743000 | 4.270101000  | 1.116972000  |
| H | 0.185345000  | 4.280324000  | 2.050518000  |
| H | 0.938245000  | 5.521630000  | 1.058161000  |
| H | -0.793694000 | 5.635663000  | 1.439081000  |
| H | -0.530233000 | 4.631753000  | -2.195796000 |
| H | -1.351183000 | 5.760859000  | -1.091568000 |
| H | 0.411813000  | 5.815114000  | -1.281320000 |
| C | 2.532499000  | 1.796718000  | 1.931895000  |
| C | 3.890604000  | 2.053651000  | 2.169712000  |
| C | 1.596145000  | 2.275985000  | 2.864539000  |
| C | 4.295246000  | 2.767955000  | 3.298675000  |
| H | 4.635215000  | 1.698620000  | 1.463695000  |
| C | 1.999359000  | 2.985154000  | 3.993636000  |
| H | 0.540184000  | 2.104536000  | 2.680712000  |
| C | 3.355079000  | 3.235430000  | 4.218182000  |
| H | 5.353404000  | 2.960765000  | 3.459282000  |
| H | 1.252064000  | 3.351277000  | 4.693918000  |
| H | 3.673856000  | 3.789964000  | 5.096584000  |
| C | 3.271913000  | 0.813900000  | -0.685560000 |
| C | 3.839658000  | -0.380488000 | -1.147529000 |
| C | 3.696806000  | 2.024305000  | -1.261736000 |
| C | 4.802551000  | -0.378344000 | -2.160204000 |
| H | 3.519129000  | -1.322102000 | -0.707491000 |
| C | 4.664445000  | 2.030557000  | -2.264659000 |
| H | 3.237948000  | 2.952253000  | -0.935365000 |
| C | 5.218230000  | 0.829412000  | -2.719855000 |
| H | 5.228113000  | -1.316448000 | -2.507922000 |
| H | 4.981563000  | 2.973990000  | -2.702192000 |
| H | 5.968701000  | 0.837365000  | -3.506193000 |
| C | -4.928013000 | -0.110141000 | -0.258178000 |
| C | -5.352868000 | -0.000847000 | -1.582386000 |
| C | -4.453380000 | -0.266677000 | -2.617652000 |
| C | -3.144415000 | -0.646739000 | -2.330300000 |
| C | -2.708766000 | -0.765141000 | -1.001513000 |
| C | -3.617948000 | -0.492369000 | 0.029237000  |

|   |              |              |              |
|---|--------------|--------------|--------------|
| H | -5.612485000 | 0.114522000  | 0.555084000  |
| H | -6.373055000 | 0.296395000  | -1.806808000 |
| H | -4.772145000 | -0.176765000 | -3.652334000 |
| H | -2.437780000 | -0.841983000 | -3.131395000 |
| H | -3.289578000 | -0.530517000 | 1.060698000  |
| C | -1.291759000 | -1.138711000 | -0.746409000 |
| C | -0.234132000 | -0.649461000 | -1.372983000 |
| C | 0.197781000  | 0.332467000  | -2.214560000 |
| O | 0.555030000  | 1.511628000  | -1.829744000 |
| O | 0.405101000  | 0.017362000  | -3.508542000 |
| C | 1.319032000  | 0.871167000  | -4.224167000 |
| H | 1.376068000  | 0.442339000  | -5.225549000 |
| H | 0.943497000  | 1.895626000  | -4.267160000 |
| H | 2.302693000  | 0.865961000  | -3.747601000 |

9

|   |              |              |              |
|---|--------------|--------------|--------------|
| P | 0.707109000  | -2.037915000 | 0.820664000  |
| C | 0.514247000  | -1.489106000 | -0.921471000 |
| C | 0.805033000  | -2.509706000 | -2.026681000 |
| H | 1.150311000  | -0.614474000 | -1.055605000 |
| H | -0.516153000 | -1.127986000 | -1.001630000 |
| C | 0.406867000  | -1.971861000 | -3.410950000 |
| H | 1.874028000  | -2.759053000 | -2.030943000 |
| H | 0.264780000  | -3.446617000 | -1.843040000 |
| C | 1.149708000  | -0.695325000 | -3.820337000 |
| H | 0.588397000  | -2.759289000 | -4.154102000 |
| H | -0.675756000 | -1.782929000 | -3.418110000 |
| H | 0.889751000  | 0.156116000  | -3.183638000 |
| H | 2.236724000  | -0.842004000 | -3.766905000 |
| H | 0.905884000  | -0.421263000 | -4.853349000 |
| C | 2.387953000  | -2.825908000 | 0.955024000  |
| C | 2.550524000  | -4.284823000 | 0.512920000  |
| H | 2.669233000  | -2.716284000 | 2.009205000  |
| H | 3.063247000  | -2.165209000 | 0.399464000  |
| C | 4.005231000  | -4.760021000 | 0.612927000  |
| H | 1.920056000  | -4.933353000 | 1.134301000  |
| H | 2.202010000  | -4.416886000 | -0.518297000 |
| C | 4.180250000  | -6.221889000 | 0.195821000  |
| H | 4.637204000  | -4.117022000 | -0.015300000 |
| H | 4.358983000  | -4.622435000 | 1.643736000  |
| H | 5.226818000  | -6.536986000 | 0.269522000  |
| H | 3.585106000  | -6.887631000 | 0.832464000  |
| H | 3.855884000  | -6.377673000 | -0.840357000 |
| C | -0.468453000 | -3.452025000 | 1.017895000  |
| C | -1.933524000 | -3.026448000 | 1.124818000  |

|   |              |              |              |
|---|--------------|--------------|--------------|
| H | -0.183253000 | -4.025976000 | 1.903006000  |
| H | -0.314921000 | -4.114810000 | 0.158105000  |
| C | -2.857037000 | -4.238440000 | 1.288958000  |
| H | -2.047089000 | -2.351400000 | 1.978632000  |
| H | -2.226680000 | -2.452620000 | 0.237387000  |
| C | -4.332835000 | -3.858275000 | 1.422756000  |
| H | -2.728522000 | -4.915529000 | 0.432201000  |
| H | -2.544587000 | -4.805988000 | 2.176661000  |
| H | -4.683643000 | -3.323024000 | 0.533523000  |
| H | -4.962293000 | -4.745539000 | 1.554188000  |
| H | -4.490692000 | -3.203097000 | 2.287403000  |
| P | -0.690675000 | 1.790292000  | 0.722908000  |
| B | 0.522483000  | 2.673391000  | -0.697262000 |
| O | 0.182459000  | 2.185803000  | -2.007401000 |
| O | 0.508837000  | 4.085595000  | -0.701575000 |
| C | 0.151294000  | 3.332307000  | -2.884349000 |
| C | -0.188335000 | 4.495599000  | -1.886224000 |
| C | 1.543905000  | 3.480461000  | -3.509641000 |
| C | -0.891915000 | 3.092497000  | -3.970436000 |
| C | -1.687677000 | 4.580688000  | -1.561158000 |
| C | 0.331857000  | 5.867860000  | -2.302019000 |
| H | 1.576958000  | 4.289629000  | -4.247306000 |
| H | 2.292991000  | 3.676818000  | -2.737502000 |
| H | 1.807066000  | 2.544467000  | -4.012488000 |
| H | -0.588028000 | 2.247821000  | -4.597957000 |
| H | -1.870962000 | 2.863575000  | -3.542671000 |
| H | -0.992482000 | 3.974037000  | -4.613843000 |
| H | -1.816958000 | 5.213868000  | -0.678621000 |
| H | -2.261928000 | 5.010679000  | -2.388737000 |
| H | -2.104298000 | 3.595404000  | -1.331525000 |
| H | 1.420006000  | 5.864873000  | -2.393074000 |
| H | -0.103029000 | 6.179583000  | -3.258758000 |
| H | 0.057836000  | 6.609511000  | -1.544871000 |
| C | -1.165422000 | 3.003238000  | 1.995051000  |
| C | -2.457058000 | 3.541842000  | 2.062581000  |
| C | -0.162902000 | 3.513242000  | 2.832645000  |
| C | -2.745093000 | 4.559773000  | 2.971214000  |
| H | -3.237628000 | 3.164196000  | 1.410365000  |
| C | -0.455616000 | 4.527796000  | 3.740593000  |
| H | 0.839544000  | 3.099030000  | 2.778693000  |
| C | -1.747414000 | 5.052877000  | 3.813266000  |
| H | -3.751567000 | 4.965918000  | 3.021693000  |
| H | 0.325799000  | 4.908935000  | 4.391782000  |
| H | -1.974678000 | 5.844467000  | 4.521656000  |

|   |              |              |              |
|---|--------------|--------------|--------------|
| C | -2.196270000 | 0.892757000  | 0.270873000  |
| C | -3.051768000 | 0.393291000  | 1.264444000  |
| C | -2.484784000 | 0.656268000  | -1.082093000 |
| C | -4.205224000 | -0.300051000 | 0.903519000  |
| H | -2.813390000 | 0.545675000  | 2.312809000  |
| C | -3.632738000 | -0.054788000 | -1.434173000 |
| H | -1.803251000 | 1.029844000  | -1.839428000 |
| C | -4.498464000 | -0.522938000 | -0.443709000 |
| H | -4.867583000 | -0.681245000 | 1.674532000  |
| H | -3.856217000 | -0.232070000 | -2.482611000 |
| H | -5.398573000 | -1.065179000 | -0.719781000 |
| C | -0.905457000 | -0.025273000 | 5.345083000  |
| C | -0.790853000 | -1.269847000 | 5.969837000  |
| C | -0.209328000 | -2.314948000 | 5.249353000  |
| C | 0.222184000  | -2.129229000 | 3.939491000  |
| C | 0.070050000  | -0.890814000 | 3.262124000  |
| C | -0.484048000 | 0.162760000  | 4.033451000  |
| H | -1.328859000 | 0.818796000  | 5.885496000  |
| H | -1.124245000 | -1.415626000 | 6.993019000  |
| H | -0.068374000 | -3.286426000 | 5.718629000  |
| H | 0.727217000  | -2.956000000 | 3.448995000  |
| H | -0.578142000 | 1.144758000  | 3.592053000  |
| C | 0.427315000  | -0.688628000 | 1.869581000  |
| C | 0.589053000  | 0.639424000  | 1.255051000  |
| C | 1.748967000  | 1.083602000  | 0.655260000  |
| O | 1.814868000  | 2.141052000  | -0.144047000 |
| O | 2.903953000  | 0.402826000  | 0.795301000  |
| C | 4.045717000  | 0.889460000  | 0.078549000  |
| H | 3.864124000  | 0.885859000  | -0.999740000 |
| H | 4.303611000  | 1.903907000  | 0.393074000  |
| H | 4.852198000  | 0.199247000  | 0.331005000  |

**10Z**

|   |              |              |              |
|---|--------------|--------------|--------------|
| P | 0.246453000  | -0.593557000 | -1.943866000 |
| C | -0.516929000 | -1.591590000 | -3.308197000 |
| C | -1.658562000 | -2.460910000 | -2.778252000 |
| H | 0.270461000  | -2.202070000 | -3.764294000 |
| H | -0.879869000 | -0.914134000 | -4.086875000 |
| C | -2.293371000 | -3.342688000 | -3.856282000 |
| H | -1.287666000 | -3.094924000 | -1.963134000 |
| H | -2.417616000 | -1.809152000 | -2.329123000 |
| C | -3.417809000 | -4.219474000 | -3.299651000 |
| H | -2.683744000 | -2.706647000 | -4.662698000 |
| H | -1.520703000 | -3.978053000 | -4.312114000 |
| H | -4.212775000 | -3.606108000 | -2.859414000 |



|   |              |              |              |
|---|--------------|--------------|--------------|
| H | -3.867903000 | -4.841122000 | -4.081446000 |
| H | -3.041951000 | -4.888059000 | -2.515489000 |
| C | 1.412638000  | 0.568209000  | -2.776684000 |
| C | 2.337282000  | 0.033892000  | -3.875962000 |
| H | 1.987579000  | 1.006477000  | -1.957000000 |
| H | 0.790263000  | 1.379352000  | -3.173958000 |
| C | 3.293225000  | 1.117677000  | -4.401089000 |
| H | 2.932871000  | -0.804756000 | -3.494509000 |
| H | 1.738462000  | -0.358954000 | -4.706901000 |
| C | 4.335161000  | 1.565831000  | -3.370464000 |
| H | 3.807323000  | 0.734449000  | -5.292106000 |
| H | 2.703578000  | 1.983362000  | -4.734481000 |
| H | 3.872354000  | 1.982701000  | -2.470599000 |
| H | 4.960860000  | 0.720106000  | -3.058620000 |
| H | 4.997235000  | 2.331264000  | -3.790457000 |
| C | 1.252164000  | -1.775654000 | -0.962786000 |
| C | 1.852432000  | -2.971240000 | -1.714273000 |
| H | 0.602583000  | -2.129899000 | -0.159954000 |
| H | 2.041004000  | -1.183272000 | -0.486541000 |
| C | 2.815805000  | -3.776309000 | -0.828293000 |
| H | 1.046241000  | -3.632247000 | -2.055820000 |
| H | 2.388772000  | -2.641300000 | -2.610906000 |
| C | 2.159272000  | -4.354932000 | 0.427601000  |
| H | 3.238327000  | -4.591394000 | -1.430303000 |
| H | 3.660433000  | -3.133716000 | -0.542644000 |
| H | 2.857795000  | -4.999037000 | 0.973283000  |
| H | 1.827086000  | -3.571314000 | 1.115486000  |
| H | 1.276906000  | -4.953327000 | 0.174449000  |
| P | -2.376351000 | -0.922691000 | 1.201609000  |
| B | 1.324722000  | 2.077921000  | 0.476977000  |
| O | 0.345805000  | 2.970898000  | 0.806978000  |
| O | 2.375281000  | 2.614181000  | -0.226933000 |
| C | 0.651928000  | 4.203477000  | 0.084069000  |
| C | 2.199934000  | 4.061030000  | -0.170344000 |
| C | -0.164197000 | 4.202719000  | -1.207457000 |
| C | 0.248674000  | 5.376898000  | 0.967474000  |
| C | 3.053851000  | 4.556628000  | 0.999324000  |
| C | 2.692521000  | 4.660301000  | -1.480906000 |
| H | -0.002329000 | 5.127879000  | -1.769897000 |
| H | 0.096324000  | 3.353344000  | -1.842675000 |
| H | -1.225867000 | 4.114606000  | -0.972837000 |
| H | 0.718441000  | 5.323269000  | 1.952056000  |
| H | 0.523543000  | 6.327501000  | 0.497333000  |
| H | -0.836564000 | 5.367208000  | 1.105265000  |

|   |              |              |              |
|---|--------------|--------------|--------------|
| H | 3.032391000  | 5.648011000  | 1.077588000  |
| H | 2.707292000  | 4.134236000  | 1.947675000  |
| H | 4.089123000  | 4.239500000  | 0.843463000  |
| H | 3.771428000  | 4.504044000  | -1.576760000 |
| H | 2.202984000  | 4.197859000  | -2.340030000 |
| H | 2.500352000  | 5.738349000  | -1.507145000 |
| C | -1.847414000 | -2.679228000 | 1.474432000  |
| C | -1.025574000 | -3.133194000 | 2.519949000  |
| C | -2.327908000 | -3.618977000 | 0.549043000  |
| C | -0.690730000 | -4.482215000 | 2.624390000  |
| H | -0.656385000 | -2.423719000 | 3.248868000  |
| C | -1.977505000 | -4.967624000 | 0.641431000  |
| H | -2.995021000 | -3.287532000 | -0.240896000 |
| C | -1.158794000 | -5.403110000 | 1.682899000  |
| H | -0.056811000 | -4.817689000 | 3.441247000  |
| H | -2.361833000 | -5.677732000 | -0.086496000 |
| H | -0.892944000 | -6.453358000 | 1.768053000  |
| C | -2.525952000 | -0.271515000 | 2.921058000  |
| C | -2.200396000 | 1.062816000  | 3.219337000  |
| C | -3.125825000 | -1.046199000 | 3.926148000  |
| C | -2.449562000 | 1.594182000  | 4.484168000  |
| H | -1.726152000 | 1.685617000  | 2.467176000  |
| C | -3.369726000 | -0.515229000 | 5.192667000  |
| H | -3.395994000 | -2.077914000 | 3.720742000  |
| C | -3.032129000 | 0.807941000  | 5.479564000  |
| H | -2.182731000 | 2.627534000  | 4.692150000  |
| H | -3.826488000 | -1.139033000 | 5.956851000  |
| H | -3.223970000 | 1.222216000  | 6.465519000  |
| C | -2.949968000 | 2.385509000  | -3.246974000 |
| C | -3.778746000 | 3.066036000  | -2.353671000 |
| C | -3.630881000 | 2.800799000  | -0.989598000 |
| C | -2.678032000 | 1.898555000  | -0.531934000 |
| C | -1.834039000 | 1.176639000  | -1.415937000 |
| C | -2.013603000 | 1.460550000  | -2.794859000 |
| H | -3.036109000 | 2.567737000  | -4.316023000 |
| H | -4.515861000 | 3.779856000  | -2.708933000 |
| H | -4.255578000 | 3.317197000  | -0.264101000 |
| H | -2.562871000 | 1.763612000  | 0.534810000  |
| H | -1.406187000 | 0.958387000  | -3.539793000 |
| C | -0.854104000 | 0.237540000  | -0.894515000 |
| C | -0.840268000 | -0.114995000 | 0.543044000  |
| C | 0.250880000  | 0.097470000  | 1.310432000  |
| O | 1.375968000  | 0.764738000  | 0.871379000  |
| O | 0.429803000  | -0.459091000 | 2.530081000  |

|   |             |              |             |
|---|-------------|--------------|-------------|
| C | 1.088750000 | 0.342535000  | 3.516164000 |
| H | 1.022518000 | -0.225555000 | 4.444774000 |
| H | 2.136123000 | 0.508498000  | 3.248660000 |
| H | 0.575415000 | 1.300864000  | 3.641826000 |

**10E**

|   |              |              |              |
|---|--------------|--------------|--------------|
| P | -0.226376000 | -1.767018000 | 0.663487000  |
| C | -0.637179000 | -0.975798000 | -0.939428000 |
| C | -1.448262000 | -1.830346000 | -1.925637000 |
| H | 0.326521000  | -0.687402000 | -1.364969000 |
| H | -1.177406000 | -0.050687000 | -0.720405000 |
| C | -1.275080000 | -1.361501000 | -3.378909000 |
| H | -1.157093000 | -2.888091000 | -1.873583000 |
| H | -2.507515000 | -1.790822000 | -1.645122000 |
| C | 0.116928000  | -1.650252000 | -3.950941000 |
| H | -2.029716000 | -1.858137000 | -4.002707000 |
| H | -1.482683000 | -0.285906000 | -3.439939000 |
| H | 0.184289000  | -1.334455000 | -4.997911000 |
| H | 0.905566000  | -1.126852000 | -3.399587000 |
| H | 0.341064000  | -2.723596000 | -3.911786000 |
| C | 0.835300000  | -3.203671000 | 0.214119000  |
| C | 2.263101000  | -2.811859000 | -0.172108000 |
| H | 0.331837000  | -3.703594000 | -0.622914000 |
| H | 0.836996000  | -3.925977000 | 1.035869000  |
| C | 3.109263000  | -4.027986000 | -0.560199000 |
| H | 2.239615000  | -2.100480000 | -1.005596000 |
| H | 2.731417000  | -2.284878000 | 0.664153000  |
| C | 4.536801000  | -3.646329000 | -0.957475000 |
| H | 3.137008000  | -4.731503000 | 0.283797000  |
| H | 2.625395000  | -4.563029000 | -1.390060000 |
| H | 5.046587000  | -3.131407000 | -0.134933000 |
| H | 5.129127000  | -4.529441000 | -1.221654000 |
| H | 4.535007000  | -2.968703000 | -1.818669000 |
| C | -1.817997000 | -2.527824000 | 1.228696000  |
| C | -1.718341000 | -3.099819000 | 2.648714000  |
| H | -2.142497000 | -3.282451000 | 0.502087000  |
| H | -2.547742000 | -1.710339000 | 1.214632000  |
| C | -3.087945000 | -3.354896000 | 3.291002000  |
| H | -1.141355000 | -4.034950000 | 2.634801000  |
| H | -1.157443000 | -2.394801000 | 3.270401000  |
| C | -3.940746000 | -4.389847000 | 2.552407000  |
| H | -2.934220000 | -3.684724000 | 4.326956000  |
| H | -3.630123000 | -2.400890000 | 3.345088000  |
| H | -4.888388000 | -4.567965000 | 3.072678000  |
| H | -4.180176000 | -4.061974000 | 1.534464000  |

|   |              |              |              |
|---|--------------|--------------|--------------|
| H | -3.415453000 | -5.350352000 | 2.477236000  |
| P | 0.657452000  | 2.122875000  | 0.486441000  |
| B | -2.591607000 | 2.541970000  | 0.774613000  |
| O | -3.127663000 | 3.775105000  | 0.531789000  |
| O | -2.810927000 | 1.617234000  | -0.221138000 |
| C | -3.499097000 | 3.775473000  | -0.875979000 |
| C | -3.729583000 | 2.245223000  | -1.159798000 |
| C | -4.731685000 | 4.651701000  | -1.054586000 |
| C | -2.305808000 | 4.352616000  | -1.643187000 |
| C | -3.368198000 | 1.794934000  | -2.568317000 |
| C | -5.134617000 | 1.766111000  | -0.786979000 |
| H | -4.480783000 | 5.689554000  | -0.816133000 |
| H | -5.083455000 | 4.615935000  | -2.091751000 |
| H | -5.545639000 | 4.339472000  | -0.397008000 |
| H | -1.413141000 | 3.735465000  | -1.501296000 |
| H | -2.518649000 | 4.437599000  | -2.713719000 |
| H | -2.088005000 | 5.351002000  | -1.253092000 |
| H | -3.557558000 | 0.722330000  | -2.674394000 |
| H | -3.977671000 | 2.322039000  | -3.310457000 |
| H | -2.314055000 | 1.978635000  | -2.785734000 |
| H | -5.409181000 | 2.095058000  | 0.219808000  |
| H | -5.885956000 | 2.135846000  | -1.491776000 |
| H | -5.151455000 | 0.672256000  | -0.804070000 |
| C | 1.525457000  | 3.207988000  | 1.706084000  |
| C | 2.799430000  | 3.731034000  | 1.433853000  |
| C | 0.873038000  | 3.618515000  | 2.880821000  |
| C | 3.414872000  | 4.611103000  | 2.323421000  |
| H | 3.321564000  | 3.437968000  | 0.529157000  |
| C | 1.492747000  | 4.495792000  | 3.769586000  |
| H | -0.122689000 | 3.252597000  | 3.101494000  |
| C | 2.768047000  | 4.993248000  | 3.498919000  |
| H | 4.406773000  | 4.993888000  | 2.097424000  |
| H | 0.974291000  | 4.790948000  | 4.678142000  |
| H | 3.250509000  | 5.674650000  | 4.194094000  |
| C | 2.070396000  | 1.271133000  | -0.328658000 |
| C | 2.077121000  | 1.230561000  | -1.729741000 |
| C | 3.143297000  | 0.692172000  | 0.367704000  |
| C | 3.126330000  | 0.624024000  | -2.426245000 |
| H | 1.252894000  | 1.681538000  | -2.276900000 |
| C | 4.198328000  | 0.102168000  | -0.325099000 |
| H | 3.156106000  | 0.710146000  | 1.451349000  |
| C | 4.192029000  | 0.063666000  | -1.722013000 |
| H | 3.116890000  | 0.604805000  | -3.512705000 |
| H | 5.022661000  | -0.340156000 | 0.227247000  |

|   |              |              |              |
|---|--------------|--------------|--------------|
| H | 5.016820000  | -0.398454000 | -2.257476000 |
| C | 2.683869000  | -2.391288000 | 4.263976000  |
| C | 3.203171000  | -1.321941000 | 4.996668000  |
| C | 2.789091000  | -0.033163000 | 4.653601000  |
| C | 1.901842000  | 0.183291000  | 3.604181000  |
| C | 1.383384000  | -0.882891000 | 2.819539000  |
| C | 1.794981000  | -2.182868000 | 3.214403000  |
| H | 2.962571000  | -3.411518000 | 4.519566000  |
| H | 3.895455000  | -1.489581000 | 5.816227000  |
| H | 3.157799000  | 0.825835000  | 5.209970000  |
| H | 1.601243000  | 1.198072000  | 3.377614000  |
| H | 1.390538000  | -3.053629000 | 2.713884000  |
| C | 0.499434000  | -0.595788000 | 1.705581000  |
| C | -0.087082000 | 0.761189000  | 1.547984000  |
| C | -1.294119000 | 1.040344000  | 2.074969000  |
| O | -1.911284000 | 2.269686000  | 1.932137000  |
| O | -2.033691000 | 0.170137000  | 2.812164000  |
| C | -1.895229000 | 0.344025000  | 4.232369000  |
| H | -2.233408000 | 1.342379000  | 4.532684000  |
| H | -2.530523000 | -0.413997000 | 4.693703000  |
| H | -0.852119000 | 0.192759000  | 4.527907000  |

**11R**

|   |              |              |              |
|---|--------------|--------------|--------------|
| P | -0.410884000 | -0.437621000 | 1.255857000  |
| C | -1.630005000 | -1.671826000 | 2.082090000  |
| C | -1.410525000 | -2.090206000 | 3.537800000  |
| H | -1.619098000 | -2.566318000 | 1.444289000  |
| H | -2.641714000 | -1.260245000 | 1.969514000  |
| C | -2.282503000 | -3.282974000 | 3.951437000  |
| H | -0.356095000 | -2.349215000 | 3.714827000  |
| H | -1.628391000 | -1.248409000 | 4.207953000  |
| C | -2.090606000 | -3.684732000 | 5.415861000  |
| H | -3.337443000 | -3.035931000 | 3.769433000  |
| H | -2.054741000 | -4.138027000 | 3.299746000  |
| H | -1.048239000 | -3.963264000 | 5.614962000  |
| H | -2.343919000 | -2.855824000 | 6.088257000  |
| H | -2.721663000 | -4.538896000 | 5.686467000  |
| C | 1.067447000  | -1.559863000 | 1.202095000  |
| C | 1.223792000  | -2.300318000 | -0.130649000 |
| H | 0.971308000  | -2.279346000 | 2.022212000  |
| H | 1.946287000  | -0.945556000 | 1.411004000  |
| C | 2.481211000  | -3.171767000 | -0.189569000 |
| H | 0.341889000  | -2.930095000 | -0.304995000 |
| H | 1.254550000  | -1.576634000 | -0.949870000 |
| C | 2.623427000  | -3.885817000 | -1.536055000 |

|   |              |              |              |
|---|--------------|--------------|--------------|
| H | 3.363550000  | -2.541448000 | -0.014373000 |
| H | 2.460566000  | -3.909416000 | 0.624841000  |
| H | 3.521689000  | -4.512304000 | -1.569235000 |
| H | 1.757337000  | -4.529690000 | -1.733340000 |
| H | 2.690100000  | -3.160667000 | -2.356180000 |
| C | -0.271611000 | 0.708828000  | 2.724409000  |
| C | -1.545036000 | 1.528322000  | 2.959765000  |
| H | 0.573930000  | 1.370510000  | 2.530917000  |
| H | -0.041938000 | 0.104297000  | 3.608429000  |
| C | -1.384399000 | 2.533723000  | 4.104637000  |
| H | -1.797423000 | 2.071426000  | 2.041654000  |
| H | -2.391611000 | 0.863338000  | 3.179833000  |
| C | -2.646622000 | 3.364560000  | 4.346564000  |
| H | -1.112309000 | 1.996727000  | 5.024455000  |
| H | -0.540602000 | 3.198276000  | 3.875030000  |
| H | -2.509330000 | 4.079097000  | 5.166108000  |
| H | -2.919794000 | 3.933136000  | 3.449126000  |
| H | -3.498498000 | 2.722314000  | 4.601929000  |
| P | -0.684878000 | 0.960990000  | -2.850034000 |
| B | 2.796748000  | 1.093391000  | 0.107302000  |
| O | 4.042069000  | 1.136038000  | -0.475729000 |
| O | 2.826253000  | 1.290432000  | 1.474223000  |
| C | 5.009803000  | 1.155436000  | 0.604959000  |
| C | 4.168161000  | 1.733729000  | 1.802455000  |
| C | 5.453583000  | -0.292743000 | 0.832128000  |
| C | 6.196081000  | 2.013093000  | 0.181942000  |
| C | 4.129418000  | 3.264463000  | 1.828522000  |
| C | 4.536279000  | 1.187792000  | 3.176219000  |
| H | 5.834291000  | -0.697174000 | -0.110207000 |
| H | 6.244844000  | -0.360210000 | 1.585438000  |
| H | 4.613876000  | -0.916455000 | 1.153817000  |
| H | 5.878165000  | 3.010682000  | -0.127572000 |
| H | 6.915750000  | 2.111497000  | 1.002317000  |
| H | 6.705944000  | 1.542579000  | -0.664270000 |
| H | 3.358846000  | 3.584862000  | 2.535684000  |
| H | 5.088650000  | 3.688796000  | 2.141190000  |
| H | 3.874395000  | 3.668875000  | 0.844069000  |
| H | 3.879939000  | 1.627555000  | 3.933533000  |
| H | 4.423425000  | 0.102513000  | 3.219801000  |
| H | 5.570665000  | 1.443679000  | 3.431059000  |
| C | -1.360427000 | -0.582227000 | -3.610418000 |
| C | -2.674865000 | -0.765150000 | -4.053748000 |
| C | -0.447547000 | -1.640712000 | -3.742342000 |
| C | -3.069632000 | -1.983381000 | -4.605735000 |

|   |              |              |              |
|---|--------------|--------------|--------------|
| H | -3.400195000 | 0.032255000  | -3.941719000 |
| C | -0.847072000 | -2.863365000 | -4.277848000 |
| H | 0.580512000  | -1.506081000 | -3.414204000 |
| C | -2.161502000 | -3.036625000 | -4.715646000 |
| H | -4.098304000 | -2.115397000 | -4.929260000 |
| H | -0.130158000 | -3.676041000 | -4.361054000 |
| H | -2.475707000 | -3.986813000 | -5.138832000 |
| C | -2.103722000 | 2.138237000  | -2.904283000 |
| C | -2.595335000 | 2.535551000  | -4.159062000 |
| C | -2.634463000 | 2.744072000  | -1.755920000 |
| C | -3.617582000 | 3.477418000  | -4.259395000 |
| H | -2.181406000 | 2.095663000  | -5.062881000 |
| C | -3.644378000 | 3.701711000  | -1.858798000 |
| H | -2.251952000 | 2.470166000  | -0.777995000 |
| C | -4.146731000 | 4.064882000  | -3.108242000 |
| H | -3.995640000 | 3.759061000  | -5.238469000 |
| H | -4.041994000 | 4.159624000  | -0.956853000 |
| H | -4.938658000 | 4.804390000  | -3.186480000 |
| C | -3.785652000 | -3.133058000 | -1.454940000 |
| C | -4.995324000 | -2.438736000 | -1.520929000 |
| C | -5.025299000 | -1.077919000 | -1.216498000 |
| C | -3.854672000 | -0.414538000 | -0.851261000 |
| C | -2.634714000 | -1.103764000 | -0.781191000 |
| C | -2.619344000 | -2.474547000 | -1.079372000 |
| H | -3.748882000 | -4.189371000 | -1.705484000 |
| H | -5.906366000 | -2.954698000 | -1.811075000 |
| H | -5.960280000 | -0.526672000 | -1.269131000 |
| H | -3.877567000 | 0.646986000  | -0.632056000 |
| H | -1.678196000 | -3.012702000 | -1.054490000 |
| C | -1.404775000 | -0.397449000 | -0.385562000 |
| C | -0.660529000 | 0.495105000  | -1.069174000 |
| C | 0.371445000  | 0.973070000  | -0.072525000 |
| O | 1.682305000  | 0.858251000  | -0.625497000 |
| O | 0.150820000  | 2.284737000  | 0.399999000  |
| C | 0.528857000  | 3.364073000  | -0.452902000 |
| H | 0.068682000  | 3.292422000  | -1.444229000 |
| H | 0.174643000  | 4.272668000  | 0.039573000  |
| H | 1.616149000  | 3.422781000  | -0.576357000 |

## 11S

|   |              |              |              |
|---|--------------|--------------|--------------|
| P | -0.668158000 | -1.435828000 | 0.165452000  |
| C | -2.156049000 | -2.121775000 | -0.707338000 |
| C | -2.152195000 | -1.815534000 | -2.210189000 |
| H | -3.033714000 | -1.657891000 | -0.245111000 |
| H | -2.217733000 | -3.201526000 | -0.539487000 |

|   |              |              |              |
|---|--------------|--------------|--------------|
| C | -3.408742000 | -2.340358000 | -2.911610000 |
| H | -2.080622000 | -0.732275000 | -2.356918000 |
| H | -1.257440000 | -2.242181000 | -2.680871000 |
| C | -3.450517000 | -1.970969000 | -4.396157000 |
| H | -3.464716000 | -3.431820000 | -2.796271000 |
| H | -4.297498000 | -1.934424000 | -2.407731000 |
| H | -4.346199000 | -2.369505000 | -4.885680000 |
| H | -3.452555000 | -0.882592000 | -4.524200000 |
| H | -2.575019000 | -2.366580000 | -4.925728000 |
| C | 0.409772000  | -3.018726000 | 0.098628000  |
| C | -0.179773000 | -4.309040000 | 0.687843000  |
| H | 1.338898000  | -2.751144000 | 0.615428000  |
| H | 0.689205000  | -3.182609000 | -0.949720000 |
| C | 0.882366000  | -5.284667000 | 1.222369000  |
| H | -0.878461000 | -4.084198000 | 1.507580000  |
| H | -0.778546000 | -4.818408000 | -0.077551000 |
| C | 1.593402000  | -4.779788000 | 2.482568000  |
| H | 0.406127000  | -6.249226000 | 1.444771000  |
| H | 1.622862000  | -5.479590000 | 0.434463000  |
| H | 2.120927000  | -3.836233000 | 2.302758000  |
| H | 0.874177000  | -4.608268000 | 3.293780000  |
| H | 2.331807000  | -5.505918000 | 2.840585000  |
| C | -0.891652000 | -1.375340000 | 2.016210000  |
| C | -2.355489000 | -1.339706000 | 2.475875000  |
| H | -0.397739000 | -0.447486000 | 2.316428000  |
| H | -0.357229000 | -2.204208000 | 2.492146000  |
| C | -2.503869000 | -0.796385000 | 3.901013000  |
| H | -2.941288000 | -0.700479000 | 1.810188000  |
| H | -2.792909000 | -2.345197000 | 2.410311000  |
| C | -3.968059000 | -0.652015000 | 4.320384000  |
| H | -1.967971000 | -1.447197000 | 4.606640000  |
| H | -2.016473000 | 0.186694000  | 3.949049000  |
| H | -4.491624000 | -1.614788000 | 4.272453000  |
| H | -4.057696000 | -0.273395000 | 5.344854000  |
| H | -4.488506000 | 0.047270000  | 3.655322000  |
| P | 0.245380000  | 2.625568000  | -1.158516000 |
| B | 2.184906000  | 0.196273000  | 1.275925000  |
| O | 3.310314000  | -0.159510000 | 1.979521000  |
| O | 1.377995000  | 1.090712000  | 1.942385000  |
| C | 3.107211000  | 0.302022000  | 3.342218000  |
| C | 2.083803000  | 1.483611000  | 3.153158000  |
| C | 2.524242000  | -0.880246000 | 4.123758000  |
| C | 4.453943000  | 0.708008000  | 3.927344000  |
| C | 2.756689000  | 2.827226000  | 2.865580000  |



|   |              |              |              |
|---|--------------|--------------|--------------|
| C | 1.059974000  | 1.637984000  | 4.271946000  |
| H | 3.203767000  | -1.732453000 | 4.032067000  |
| H | 2.405442000  | -0.643416000 | 5.185785000  |
| H | 1.550984000  | -1.180391000 | 3.724930000  |
| H | 5.100057000  | -0.171559000 | 4.005707000  |
| H | 4.959290000  | 1.444126000  | 3.299157000  |
| H | 4.327714000  | 1.129245000  | 4.930752000  |
| H | 3.525113000  | 2.731960000  | 2.093399000  |
| H | 2.000708000  | 3.532978000  | 2.509551000  |
| H | 3.223880000  | 3.239837000  | 3.765289000  |
| H | 0.461456000  | 0.733986000  | 4.400114000  |
| H | 1.555620000  | 1.868182000  | 5.221426000  |
| H | 0.381368000  | 2.463221000  | 4.034570000  |
| C | 1.923044000  | 2.417342000  | -1.913975000 |
| C | 2.181764000  | 2.284695000  | -3.284152000 |
| C | 3.012379000  | 2.436997000  | -1.029238000 |
| C | 3.490747000  | 2.148950000  | -3.749902000 |
| H | 1.360281000  | 2.280491000  | -3.991547000 |
| C | 4.318247000  | 2.281550000  | -1.488876000 |
| H | 2.827483000  | 2.580495000  | 0.030361000  |
| C | 4.562285000  | 2.136176000  | -2.856186000 |
| H | 3.671907000  | 2.046352000  | -4.816742000 |
| H | 5.143887000  | 2.281976000  | -0.782200000 |
| H | 5.579166000  | 2.023179000  | -3.221765000 |
| C | -0.864694000 | 2.694819000  | -2.633464000 |
| C | -1.050342000 | 1.607240000  | -3.503562000 |
| C | -1.572854000 | 3.878880000  | -2.869646000 |
| C | -1.916517000 | 1.713779000  | -4.590345000 |
| H | -0.509564000 | 0.683445000  | -3.323578000 |
| C | -2.448202000 | 3.982214000  | -3.953215000 |
| H | -1.446666000 | 4.718926000  | -2.191928000 |
| C | -2.620194000 | 2.900510000  | -4.815643000 |
| H | -2.042047000 | 0.870329000  | -5.263840000 |
| H | -2.997397000 | 4.905056000  | -4.119051000 |
| H | -3.300656000 | 2.978310000  | -5.659311000 |
| C | -3.450575000 | 2.804042000  | 1.984520000  |
| C | -4.685429000 | 2.683841000  | 1.341557000  |
| C | -4.789621000 | 1.889041000  | 0.197815000  |
| C | -3.678958000 | 1.201501000  | -0.287262000 |
| C | -2.433428000 | 1.307066000  | 0.356106000  |
| C | -2.334036000 | 2.131548000  | 1.493761000  |
| H | -3.356726000 | 3.429364000  | 2.868798000  |
| H | -5.555783000 | 3.209319000  | 1.724207000  |
| H | -5.742532000 | 1.800962000  | -0.317525000 |

|   |              |              |              |
|---|--------------|--------------|--------------|
| H | -3.766100000 | 0.584325000  | -1.176800000 |
| H | -1.369189000 | 2.221858000  | 1.983950000  |
| C | -1.279805000 | 0.507468000  | -0.048183000 |
| C | -0.124970000 | 0.919223000  | -0.595969000 |
| C | 0.735675000  | -0.320983000 | -0.675329000 |
| O | 1.941644000  | -0.352986000 | 0.057718000  |
| O | 1.005891000  | -0.705788000 | -1.996009000 |
| C | 2.319503000  | -1.144596000 | -2.345859000 |
| H | 2.604926000  | -2.047239000 | -1.795409000 |
| H | 2.263153000  | -1.368918000 | -3.413078000 |
| H | 3.062280000  | -0.362964000 | -2.175979000 |

**12R**

|   |              |              |              |
|---|--------------|--------------|--------------|
| P | -0.612996000 | -1.789655000 | 1.063342000  |
| C | -1.297029000 | -1.966635000 | 2.747530000  |
| C | -0.813954000 | -3.152115000 | 3.590332000  |
| H | -2.387467000 | -1.962211000 | 2.646702000  |
| H | -1.028876000 | -1.012916000 | 3.215269000  |
| C | -1.217322000 | -2.990469000 | 5.061021000  |
| H | -1.230442000 | -4.088858000 | 3.201153000  |
| H | 0.278096000  | -3.251240000 | 3.529650000  |
| C | -0.770726000 | -4.169023000 | 5.928047000  |
| H | -0.786288000 | -2.057403000 | 5.447869000  |
| H | -2.307617000 | -2.873556000 | 5.124435000  |
| H | 0.319321000  | -4.287180000 | 5.902728000  |
| H | -1.066905000 | -4.028641000 | 6.972996000  |
| H | -1.214902000 | -5.108699000 | 5.577890000  |
| C | -0.817330000 | -3.283724000 | 0.031843000  |
| C | -0.072572000 | -4.554340000 | 0.473437000  |
| H | -0.494789000 | -2.956003000 | -0.961945000 |
| H | -1.895279000 | -3.455926000 | -0.046303000 |
| C | 0.032210000  | -5.584015000 | -0.663256000 |
| H | 0.938390000  | -4.310045000 | 0.822417000  |
| H | -0.591484000 | -5.004362000 | 1.326024000  |
| C | 0.949313000  | -5.145863000 | -1.809868000 |
| H | 0.405359000  | -6.526790000 | -0.243399000 |
| H | -0.973308000 | -5.796445000 | -1.051434000 |
| H | 0.591212000  | -4.234794000 | -2.301695000 |
| H | 1.964293000  | -4.947020000 | -1.444603000 |
| H | 1.017468000  | -5.925828000 | -2.575593000 |
| C | 1.158802000  | -1.387859000 | 1.263603000  |
| C | 2.049960000  | -1.655488000 | 0.042987000  |
| H | 1.523510000  | -1.951652000 | 2.130914000  |
| H | 1.167968000  | -0.331351000 | 1.562761000  |
| C | 3.395312000  | -0.931108000 | 0.158380000  |

|   |              |              |              |
|---|--------------|--------------|--------------|
| H | 2.224682000  | -2.732890000 | -0.063945000 |
| H | 1.546409000  | -1.343918000 | -0.877024000 |
| C | 4.349988000  | -1.278656000 | -0.986237000 |
| H | 3.214520000  | 0.151901000  | 0.181599000  |
| H | 3.862204000  | -1.182887000 | 1.120671000  |
| H | 4.575745000  | -2.351972000 | -0.998466000 |
| H | 3.914189000  | -1.019962000 | -1.957605000 |
| H | 5.298158000  | -0.738731000 | -0.889445000 |
| P | -0.641366000 | -0.362765000 | -2.301260000 |
| B | -0.870210000 | 1.671217000  | 1.445052000  |
| O | -1.487122000 | 2.888359000  | 1.874934000  |
| O | 0.168302000  | 1.351722000  | 2.441734000  |
| C | -1.309548000 | 2.982778000  | 3.287647000  |
| C | 0.099446000  | 2.310551000  | 3.505108000  |
| C | -1.381157000 | 4.456577000  | 3.685934000  |
| C | -2.448633000 | 2.216732000  | 3.984499000  |
| C | 0.257045000  | 1.572791000  | 4.835998000  |
| C | 1.253168000  | 3.307628000  | 3.337758000  |
| H | -1.164017000 | 4.593308000  | 4.752109000  |
| H | -0.680660000 | 5.057911000  | 3.102743000  |
| H | -2.390145000 | 4.835777000  | 3.493131000  |
| H | -3.402075000 | 2.623674000  | 3.633146000  |
| H | -2.427877000 | 1.155486000  | 3.726119000  |
| H | -2.407962000 | 2.321594000  | 5.074863000  |
| H | 0.155112000  | 2.257298000  | 5.686427000  |
| H | -0.486714000 | 0.778502000  | 4.942476000  |
| H | 1.251927000  | 1.115958000  | 4.888399000  |
| H | 1.306022000  | 4.015045000  | 4.172762000  |
| H | 2.198508000  | 2.754899000  | 3.297918000  |
| H | 1.146718000  | 3.869261000  | 2.407011000  |
| C | -2.236028000 | 0.008066000  | -3.146515000 |
| C | -2.782498000 | -0.968074000 | -3.989116000 |
| C | -2.909393000 | 1.228782000  | -3.000260000 |
| C | -3.972493000 | -0.728591000 | -4.678850000 |
| H | -2.271847000 | -1.920892000 | -4.102263000 |
| C | -4.099226000 | 1.469469000  | -3.685013000 |
| H | -2.506635000 | 1.981347000  | -2.330645000 |
| C | -4.632697000 | 0.491092000  | -4.527528000 |
| H | -4.385064000 | -1.495040000 | -5.329304000 |
| H | -4.611630000 | 2.419467000  | -3.559553000 |
| H | -5.560755000 | 0.678395000  | -5.060552000 |
| C | 0.552275000  | 0.640870000  | -3.280921000 |
| C | 1.851974000  | 0.832076000  | -2.786690000 |
| C | 0.243364000  | 1.133448000  | -4.555276000 |

|            |              |              |              |
|------------|--------------|--------------|--------------|
| C          | 2.805858000  | 1.520724000  | -3.527485000 |
| H          | 2.104496000  | 0.487446000  | -1.792827000 |
| C          | 1.204566000  | 1.815885000  | -5.303871000 |
| H          | -0.752696000 | 0.997418000  | -4.962389000 |
| C          | 2.485673000  | 2.016281000  | -4.793307000 |
| H          | 3.792542000  | 1.687697000  | -3.105869000 |
| H          | 0.943959000  | 2.198380000  | -6.287320000 |
| H          | 3.227935000  | 2.558355000  | -5.372468000 |
| C          | 2.630920000  | 3.835588000  | -0.627806000 |
| C          | 2.275309000  | 4.562167000  | -1.765138000 |
| C          | 1.031195000  | 4.343298000  | -2.358557000 |
| C          | 0.157416000  | 3.396037000  | -1.831466000 |
| C          | 0.508065000  | 2.647382000  | -0.699437000 |
| C          | 1.750000000  | 2.898548000  | -0.091873000 |
| H          | 3.593998000  | 4.002440000  | -0.151984000 |
| H          | 2.959844000  | 5.294462000  | -2.184402000 |
| H          | 0.745221000  | 4.900819000  | -3.245995000 |
| H          | -0.797757000 | 3.220248000  | -2.312433000 |
| H          | 2.015309000  | 2.337086000  | 0.796744000  |
| C          | -0.363342000 | 1.618636000  | -0.112277000 |
| C          | -0.837384000 | 0.493893000  | -0.694182000 |
| C          | -1.617428000 | -0.303689000 | 0.357025000  |
| O          | -1.875940000 | 0.495819000  | 1.411070000  |
| O          | -2.760635000 | -0.993252000 | -0.131143000 |
| C          | -3.953397000 | -0.201943000 | -0.133626000 |
| H          | -4.334606000 | -0.070589000 | 0.882725000  |
| H          | -3.777840000 | 0.780170000  | -0.577713000 |
| H          | -4.668276000 | -0.753876000 | -0.746963000 |
| <b>12S</b> |              |              |              |
| P          | -0.631227000 | -2.157815000 | 1.232004000  |
| C          | -1.843954000 | -3.371969000 | 0.566577000  |
| C          | -1.590967000 | -3.920933000 | -0.844287000 |
| H          | -2.804966000 | -2.848103000 | 0.584195000  |
| H          | -1.896391000 | -4.187293000 | 1.302098000  |
| C          | -2.759753000 | -4.783109000 | -1.329647000 |
| H          | -1.440008000 | -3.088886000 | -1.534020000 |
| H          | -0.662780000 | -4.503729000 | -0.864787000 |
| C          | -2.543890000 | -5.283921000 | -2.759746000 |
| H          | -2.907726000 | -5.635192000 | -0.651208000 |
| H          | -3.683573000 | -4.189135000 | -1.283161000 |
| H          | -3.391799000 | -5.884856000 | -3.106267000 |
| H          | -2.418826000 | -4.441331000 | -3.449676000 |
| H          | -1.642682000 | -5.904917000 | -2.828358000 |
| C          | 0.764396000  | -3.038595000 | 2.018565000  |

|   |              |              |              |
|---|--------------|--------------|--------------|
| C | 1.678745000  | -3.801197000 | 1.051754000  |
| H | 0.342917000  | -3.706130000 | 2.781650000  |
| H | 1.336838000  | -2.259936000 | 2.531223000  |
| C | 2.877223000  | -4.417870000 | 1.779426000  |
| H | 1.113556000  | -4.589003000 | 0.537905000  |
| H | 2.028930000  | -3.110740000 | 0.280187000  |
| C | 3.814433000  | -5.164424000 | 0.828106000  |
| H | 3.430576000  | -3.619775000 | 2.292486000  |
| H | 2.521498000  | -5.101410000 | 2.563453000  |
| H | 4.207145000  | -4.490650000 | 0.057588000  |
| H | 4.667344000  | -5.594411000 | 1.364099000  |
| H | 3.291507000  | -5.982768000 | 0.318320000  |
| C | -1.511484000 | -1.231481000 | 2.540589000  |
| C | -0.602513000 | -0.418456000 | 3.479788000  |
| H | -2.134013000 | -1.944952000 | 3.094834000  |
| H | -2.198447000 | -0.570429000 | 2.001650000  |
| C | -1.345436000 | 0.769753000  | 4.098995000  |
| H | -0.220666000 | -1.076614000 | 4.271573000  |
| H | 0.266069000  | -0.025871000 | 2.946409000  |
| C | -0.437021000 | 1.588320000  | 5.017880000  |
| H | -1.704019000 | 1.413155000  | 3.283893000  |
| H | -2.235681000 | 0.423665000  | 4.643637000  |
| H | -0.960612000 | 2.461413000  | 5.422978000  |
| H | -0.084617000 | 0.986471000  | 5.864903000  |
| H | 0.438379000  | 1.934536000  | 4.459779000  |
| P | -2.398987000 | -0.182903000 | -0.896574000 |
| B | 1.339057000  | 1.068803000  | 0.741062000  |
| O | 2.438309000  | 1.533288000  | -0.074609000 |
| O | 1.596376000  | 1.519814000  | 2.098015000  |
| C | 3.324519000  | 2.308281000  | 0.731808000  |
| C | 2.995835000  | 1.810922000  | 2.186617000  |
| C | 4.760000000  | 2.035823000  | 0.281477000  |
| C | 2.994405000  | 3.794312000  | 0.525783000  |
| C | 3.212643000  | 2.851345000  | 3.282304000  |
| C | 3.735198000  | 0.511581000  | 2.547324000  |
| H | 4.976469000  | 0.965131000  | 0.283301000  |
| H | 4.900412000  | 2.406299000  | -0.739715000 |
| H | 5.484780000  | 2.544042000  | 0.929175000  |
| H | 1.986695000  | 4.026462000  | 0.878249000  |
| H | 3.708110000  | 4.451484000  | 1.036238000  |
| H | 3.031158000  | 4.011152000  | -0.546651000 |
| H | 4.259155000  | 3.176383000  | 3.316141000  |
| H | 2.580509000  | 3.727729000  | 3.121763000  |
| H | 2.960467000  | 2.423897000  | 4.259305000  |

|   |              |              |              |
|---|--------------|--------------|--------------|
| H | 3.606657000  | -0.237742000 | 1.761651000  |
| H | 4.806274000  | 0.677891000  | 2.707632000  |
| H | 3.307253000  | 0.112203000  | 3.473694000  |
| C | -3.432214000 | 1.331287000  | -0.805609000 |
| C | -4.069518000 | 1.876924000  | -1.926513000 |
| C | -3.653150000 | 1.917473000  | 0.450473000  |
| C | -4.884684000 | 3.002356000  | -1.797343000 |
| H | -3.913807000 | 1.435627000  | -2.905451000 |
| C | -4.449704000 | 3.050478000  | 0.574684000  |
| H | -3.167096000 | 1.508691000  | 1.331760000  |
| C | -5.067965000 | 3.599127000  | -0.551219000 |
| H | -5.365591000 | 3.420158000  | -2.677920000 |
| H | -4.578169000 | 3.513097000  | 1.548822000  |
| H | -5.688089000 | 4.485830000  | -0.454997000 |
| C | -2.143101000 | -0.421651000 | -2.702293000 |
| C | -1.174408000 | 0.271704000  | -3.439926000 |
| C | -2.951453000 | -1.359174000 | -3.361031000 |
| C | -1.015223000 | 0.030649000  | -4.803835000 |
| H | -0.533436000 | 0.988086000  | -2.937617000 |
| C | -2.799185000 | -1.596430000 | -4.727927000 |
| H | -3.701018000 | -1.908272000 | -2.796559000 |
| C | -1.827098000 | -0.903479000 | -5.451003000 |
| H | -0.255575000 | 0.571493000  | -5.361592000 |
| H | -3.434308000 | -2.324667000 | -5.224922000 |
| H | -1.700407000 | -1.092262000 | -6.513341000 |
| C | -1.651209000 | 4.688995000  | -1.068263000 |
| C | -1.652408000 | 5.434015000  | 0.112209000  |
| C | -1.134664000 | 4.873162000  | 1.280614000  |
| C | -0.624074000 | 3.576683000  | 1.269972000  |
| C | -0.656982000 | 2.802206000  | 0.096333000  |
| C | -1.159823000 | 3.386691000  | -1.075263000 |
| H | -2.048911000 | 5.117411000  | -1.983897000 |
| H | -2.047003000 | 6.446477000  | 0.118345000  |
| H | -1.117334000 | 5.450658000  | 2.201392000  |
| H | -0.186633000 | 3.142766000  | 2.162125000  |
| H | -1.177598000 | 2.810589000  | -1.992867000 |
| C | -0.147816000 | 1.425753000  | 0.154907000  |
| C | -0.746910000 | 0.290992000  | -0.270187000 |
| C | 0.161015000  | -0.902337000 | 0.033684000  |
| O | 1.279274000  | -0.478547000 | 0.666148000  |
| O | 0.427078000  | -1.718376000 | -1.109250000 |
| C | 1.471972000  | -1.193554000 | -1.936388000 |
| H | 1.404600000  | -1.741695000 | -2.877957000 |
| H | 1.340399000  | -0.123685000 | -2.116734000 |

|    |             |                 |                 |
|----|-------------|-----------------|-----------------|
| H  | 2.449374000 | -1.341009000    | -1.469108000    |
| S1 |             |                 |                 |
| P  |             | -1.146301000000 | -0.577372000000 |
| B  |             | -2.852010000000 | -0.566747000000 |
| O  |             | -2.956806000000 | -1.765257000000 |
| O  |             | -2.727030000000 | 0.543559000000  |
| C  |             | -2.827462000000 | -1.442327000000 |
| C  |             | -3.221867000000 | 0.078071000000  |
| C  |             | -1.378256000000 | -1.682360000000 |
| C  |             | -3.761722000000 | -2.359401000000 |
| C  |             | -4.741294000000 | 0.296400000000  |
| C  |             | -2.556729000000 | 0.894710000000  |
| H  |             | -0.685168000000 | -1.011217000000 |
| H  |             | -1.091437000000 | -2.707096000000 |
| H  |             | -1.262564000000 | -1.541603000000 |
| H  |             | -3.414305000000 | -3.394312000000 |
| H  |             | -4.780448000000 | -2.313994000000 |
| H  |             | -3.776290000000 | -2.088852000000 |
| H  |             | -5.169117000000 | 0.023349000000  |
| H  |             | -5.239107000000 | -0.284696000000 |
| H  |             | -4.948070000000 | 1.356395000000  |
| H  |             | -1.467531000000 | 0.856994000000  |
| H  |             | -2.850307000000 | 0.527157000000  |
| H  |             | -2.867927000000 | 1.941644000000  |
| C  |             | -0.288735000000 | 1.017431000000  |
| C  |             | -0.206780000000 | 1.888804000000  |
| C  |             | 0.306967000000  | 1.371424000000  |
| C  |             | 0.481522000000  | 3.095447000000  |
| H  |             | -0.709363000000 | 1.626986000000  |
| C  |             | 0.990065000000  | 2.580554000000  |
| H  |             | 0.226787000000  | 0.706511000000  |
| C  |             | 1.081611000000  | 3.441092000000  |
| H  |             | 0.540774000000  | 3.770440000000  |
| H  |             | 1.447477000000  | 2.851917000000  |
| H  |             | 1.613610000000  | 4.383710000000  |
| C  |             | 0.067883000000  | -1.757757000000 |
| C  |             | 1.364601000000  | -1.378319000000 |
| C  |             | -0.330461000000 | -3.096897000000 |
| C  |             | 2.255833000000  | -2.330643000000 |
| H  |             | 1.675859000000  | -0.343868000000 |
| C  |             | 0.567688000000  | -4.044162000000 |
| H  |             | -1.341776000000 | -3.387375000000 |
| C  |             | 1.860563000000  | -3.663121000000 |
| H  |             | 3.259797000000  | -2.030757000000 |

|   |                 |                 |                 |
|---|-----------------|-----------------|-----------------|
| H | 0.257289000000  | -5.080681000000 | -2.874385000000 |
| H | 2.557595000000  | -4.404052000000 | -3.528386000000 |
| C | 0.937193000000  | -3.151763000000 | 1.856049000000  |
| C | 0.173707000000  | -3.907827000000 | 2.744227000000  |
| C | -1.214158000000 | -3.737780000000 | 2.777363000000  |
| C | -1.828782000000 | -2.825727000000 | 1.927339000000  |
| C | -1.071621000000 | -2.066105000000 | 1.018681000000  |
| C | 0.320529000000  | -2.239364000000 | 1.000435000000  |
| H | 2.016782000000  | -3.270168000000 | 1.825283000000  |
| H | 0.653330000000  | -4.621612000000 | 3.408152000000  |
| H | -1.816910000000 | -4.320330000000 | 3.468920000000  |
| H | -2.904056000000 | -2.676877000000 | 1.950442000000  |
| H | 0.929921000000  | -1.661135000000 | 0.314945000000  |
| C | -1.762437000000 | -1.103125000000 | 0.137016000000  |
| C | -2.993050000000 | -0.609805000000 | 0.334480000000  |
| C | -3.780126000000 | 0.060229000000  | -0.569891000000 |
| O | -4.021659000000 | -0.409919000000 | -1.777149000000 |
| O | -4.415539000000 | 1.177738000000  | -0.206289000000 |
| C | -5.051300000000 | 1.928760000000  | -1.258191000000 |
| H | -4.362993000000 | 2.083184000000  | -2.092428000000 |
| H | -5.942120000000 | 1.406818000000  | -1.616969000000 |
| H | -5.328287000000 | 2.877840000000  | -0.798486000000 |

**S2R**

|   |             |             |             |
|---|-------------|-------------|-------------|
| P | 1.14880700  | -1.41969100 | 0.28880200  |
| C | -0.18224000 | -1.48854100 | -0.94927200 |
| C | -0.39245100 | -2.81771000 | -1.68480000 |
| H | 0.03793800  | -0.65994700 | -1.62543300 |
| H | -1.09396300 | -1.20107900 | -0.41554600 |
| C | -1.57461100 | -2.72253500 | -2.66307600 |
| H | 0.51243200  | -3.10020100 | -2.23593600 |
| H | -0.58728700 | -3.62260600 | -0.96553300 |
| C | -1.38612000 | -1.67379800 | -3.76347000 |
| H | -1.72684000 | -3.70877300 | -3.11947300 |
| H | -2.48802700 | -2.49738500 | -2.09595400 |
| H | -1.35291100 | -0.65690800 | -3.35870100 |
| H | -0.45301100 | -1.84464800 | -4.31514600 |
| H | -2.21010400 | -1.71197100 | -4.48362800 |
| C | 2.76503100  | -1.09217800 | -0.47897600 |
| C | 3.05579500  | -1.85945000 | -1.77348700 |
| H | 3.52367500  | -1.28394000 | 0.28836700  |
| H | 2.75121600  | -0.01438900 | -0.65804200 |
| C | 4.43888000  | -1.51513000 | -2.33814600 |
| H | 2.99040900  | -2.94337200 | -1.60618100 |
| H | 2.29365400  | -1.60852000 | -2.52078600 |



|   |             |             |             |
|---|-------------|-------------|-------------|
| C | 4.71654100  | -2.21673400 | -3.66869300 |
| H | 4.51081300  | -0.42767100 | -2.46999000 |
| H | 5.20809800  | -1.78697200 | -1.60279700 |
| H | 5.71105900  | -1.96384700 | -4.05074700 |
| H | 4.66658900  | -3.30698700 | -3.56022400 |
| H | 3.98201100  | -1.92311800 | -4.42801400 |
| C | 1.21650100  | -3.00248400 | 1.20212900  |
| C | -0.05680900 | -3.32636100 | 1.99802100  |
| H | 2.08072900  | -2.94045000 | 1.87050700  |
| H | 1.42569700  | -3.78454900 | 0.46030100  |
| C | -0.05702900 | -4.75208300 | 2.55485100  |
| H | -0.14948700 | -2.60681300 | 2.81559900  |
| H | -0.94595900 | -3.18778300 | 1.37067500  |
| C | -1.32258100 | -5.04103400 | 3.36607200  |
| H | 0.02749400  | -5.46969900 | 1.72635300  |
| H | 0.83167700  | -4.90041400 | 3.18345100  |
| H | -2.22206900 | -4.90409500 | 2.75403900  |
| H | -1.32700900 | -6.06696900 | 3.74925200  |
| H | -1.40369900 | -4.36027900 | 4.22124200  |
| P | -1.05376100 | 3.03399100  | 0.53585900  |
| B | 0.68873700  | 2.10829600  | -0.06845800 |
| O | 0.59515900  | 1.40646300  | -1.34925000 |
| O | 1.59820200  | 3.21065000  | -0.26687900 |
| C | 1.06374500  | 2.29027100  | -2.37818800 |
| C | 2.07805400  | 3.22396900  | -1.60760600 |
| C | 1.69319300  | 1.44398600  | -3.48517900 |
| C | -0.14209200 | 3.04978000  | -2.95038900 |
| C | 2.09175100  | 4.67104400  | -2.10595500 |
| C | 3.51972700  | 2.69061100  | -1.60227200 |
| H | 2.11353000  | 2.07748300  | -4.27429400 |
| H | 2.48999500  | 0.80299000  | -3.10030000 |
| H | 0.92899400  | 0.80370700  | -3.94065500 |
| H | -0.87685300 | 2.32447300  | -3.31574100 |
| H | -0.62537800 | 3.65950900  | -2.18250400 |
| H | 0.14418400  | 3.69751400  | -3.78570000 |
| H | 2.80538700  | 5.25175400  | -1.51243500 |
| H | 2.39583400  | 4.73039400  | -3.15812900 |
| H | 1.10949200  | 5.13359700  | -1.99398200 |
| H | 3.56462300  | 1.65844500  | -1.24720900 |
| H | 3.98774600  | 2.74093100  | -2.59240900 |
| H | 4.10885500  | 3.29864400  | -0.90926300 |
| C | -0.79456100 | 3.18034900  | 2.35375800  |
| C | 0.37591000  | 3.86263800  | 2.74546100  |
| C | -1.63557000 | 2.69881600  | 3.36916900  |

|            |             |             |             |
|------------|-------------|-------------|-------------|
| C          | 0.69226400  | 4.03994000  | 4.08981000  |
| H          | 1.05180400  | 4.23174900  | 1.97878900  |
| C          | -1.32238900 | 2.88546600  | 4.71687400  |
| H          | -2.53481500 | 2.15463500  | 3.11162000  |
| C          | -0.15542100 | 3.55353600  | 5.08922300  |
| H          | 1.60611100  | 4.56413800  | 4.35963200  |
| H          | -1.99859400 | 2.50509200  | 5.48023000  |
| H          | 0.08628900  | 3.70032200  | 6.13849100  |
| C          | -2.55184400 | 2.00848800  | 0.26106800  |
| C          | -3.77056300 | 2.25331500  | 0.92167300  |
| C          | -2.56724700 | 1.07306700  | -0.79237200 |
| C          | -4.93064700 | 1.55500400  | 0.58707500  |
| H          | -3.82130900 | 3.01623700  | 1.69163500  |
| C          | -3.73060500 | 0.38990000  | -1.14052100 |
| H          | -1.65121500 | 0.90464600  | -1.34474000 |
| C          | -4.91995700 | 0.61407100  | -0.44251100 |
| H          | -5.85032400 | 1.75441900  | 1.13126000  |
| H          | -3.70954000 | -0.31833700 | -1.96680400 |
| H          | -5.82559500 | 0.07392100  | -0.70443400 |
| C          | -5.03009100 | -2.01007400 | 2.22457600  |
| C          | -5.50742200 | -1.63022800 | 3.48018700  |
| C          | -4.71348800 | -0.84370200 | 4.31886100  |
| C          | -3.44879800 | -0.43645100 | 3.90744700  |
| C          | -2.96600200 | -0.80932600 | 2.63939600  |
| C          | -3.76770300 | -1.60503100 | 1.80275700  |
| H          | -5.64767600 | -2.61514200 | 1.56708300  |
| H          | -6.49521400 | -1.94465700 | 3.80457900  |
| H          | -5.08234000 | -0.54705700 | 5.29649300  |
| H          | -2.82313900 | 0.17395600  | 4.54990400  |
| H          | -3.40368400 | -1.87101300 | 0.81693600  |
| C          | -1.67051400 | -0.40265300 | 2.21880000  |
| C          | -0.56673700 | -0.03640200 | 1.87723800  |
| C          | 0.84821900  | 0.05600500  | 1.48894600  |
| O          | 1.30593800  | 1.20621700  | 0.96138400  |
| O          | 1.67948000  | -0.35787700 | 2.56436500  |
| C          | 1.75942400  | 0.62321400  | 3.61220500  |
| H          | 2.21553200  | 1.54291600  | 3.24382300  |
| H          | 0.76281400  | 0.85042800  | 4.00534600  |
| H          | 2.37621600  | 0.16992800  | 4.39043900  |
| <b>S2S</b> |             |             |             |
| P          | -0.48085100 | -2.46308100 | 0.05174100  |
| C          | 0.87235300  | -2.21709800 | 1.24240100  |
| C          | 1.76453900  | -3.45588300 | 1.41759700  |
| H          | 0.40387900  | -1.92594700 | 2.18481800  |

|   |             |             |             |
|---|-------------|-------------|-------------|
| H | 1.44310200  | -1.34705400 | 0.90195500  |
| C | 2.92497500  | -3.21223400 | 2.39281400  |
| H | 1.16106900  | -4.29683500 | 1.78490900  |
| H | 2.17091000  | -3.76155000 | 0.44534600  |
| C | 2.47230000  | -2.87105100 | 3.81416300  |
| H | 3.54934700  | -4.11449100 | 2.41296800  |
| H | 3.55183600  | -2.40068300 | 2.00604900  |
| H | 1.78955600  | -3.63388200 | 4.20942500  |
| H | 3.33063700  | -2.80762200 | 4.49140900  |
| H | 1.96235700  | -1.90342400 | 3.84748000  |
| C | -1.43197400 | -3.95201500 | 0.53335300  |
| C | -2.02795200 | -3.94151800 | 1.95832100  |
| H | -0.73881300 | -4.79143800 | 0.40267400  |
| H | -2.22183800 | -4.06896500 | -0.21660800 |
| C | -3.46028600 | -3.39966800 | 2.02107600  |
| H | -2.01784600 | -4.97086900 | 2.33777800  |
| H | -1.38967500 | -3.36570200 | 2.63962500  |
| C | -3.98407100 | -3.32397200 | 3.45556100  |
| H | -3.49589000 | -2.41171800 | 1.55626100  |
| H | -4.10818800 | -4.04987600 | 1.41716100  |
| H | -3.37762600 | -2.63992900 | 4.05896900  |
| H | -5.01691400 | -2.96021100 | 3.47980300  |
| H | -3.96506500 | -4.30822800 | 3.94005400  |
| C | 0.19593800  | -2.75306700 | -1.62381500 |
| C | 1.45086700  | -1.93041200 | -1.95981700 |
| H | -0.61850000 | -2.51204600 | -2.31591200 |
| H | 0.39401000  | -3.82968400 | -1.70807900 |
| C | 1.98223800  | -2.24646900 | -3.36074800 |
| H | 1.20780100  | -0.86710200 | -1.89088000 |
| H | 2.24137400  | -2.13645600 | -1.22640500 |
| C | 3.25368400  | -1.45253100 | -3.66795000 |
| H | 2.18070000  | -3.32402300 | -3.45650200 |
| H | 1.20914600  | -2.00578400 | -4.10233900 |
| H | 3.61318500  | -1.64852200 | -4.68384800 |
| H | 3.06754300  | -0.37772400 | -3.57427600 |
| H | 4.05849400  | -1.71482600 | -2.97006600 |
| P | -0.35581500 | 2.32831400  | 0.66788200  |
| B | -0.62151400 | 1.40855400  | -1.11258200 |
| O | -1.77954300 | 1.97827600  | -1.75267100 |
| O | 0.46432900  | 1.45437900  | -2.07060400 |
| C | -1.56080000 | 1.97027100  | -3.17061800 |
| C | 0.01065300  | 2.04040200  | -3.29463200 |
| C | -2.14857400 | 0.66953900  | -3.74427000 |
| C | -2.29435500 | 3.16905400  | -3.76854500 |

|   |             |             |             |
|---|-------------|-------------|-------------|
| C | 0.55741400  | 3.47074300  | -3.38096500 |
| C | 0.58043200  | 1.22820400  | -4.46066000 |
| H | -2.02990900 | 0.60896300  | -4.83150700 |
| H | -1.68170700 | -0.20452300 | -3.28338100 |
| H | -3.21956800 | 0.63561100  | -3.51997600 |
| H | -3.37301500 | 3.05133700  | -3.61795200 |
| H | -1.98413900 | 4.09744100  | -3.28504200 |
| H | -2.10841300 | 3.25159900  | -4.84586200 |
| H | 0.15592100  | 4.10400200  | -2.59170600 |
| H | 1.64419600  | 3.43424600  | -3.25667900 |
| H | 0.33547800  | 3.92951400  | -4.35138400 |
| H | 0.33595700  | 0.16783600  | -4.36807100 |
| H | 0.20080800  | 1.59212700  | -5.42285200 |
| H | 1.67108600  | 1.32605900  | -4.47361700 |
| C | 1.23749500  | 1.57389400  | 1.25014700  |
| C | 2.26043700  | 1.14059100  | 0.38605300  |
| C | 1.41672000  | 1.38548500  | 2.62952100  |
| C | 3.41756700  | 0.54175200  | 0.89040800  |
| H | 2.13479100  | 1.28022100  | -0.68243800 |
| C | 2.57246000  | 0.78805200  | 3.13751900  |
| H | 0.63554600  | 1.71644400  | 3.30804100  |
| C | 3.57912100  | 0.36449500  | 2.26734000  |
| H | 4.19911800  | 0.21922200  | 0.20596900  |
| H | 2.69386400  | 0.66578800  | 4.21135700  |
| H | 4.48484900  | -0.09103600 | 2.65960800  |
| C | 0.16814400  | 3.99015200  | 0.07416100  |
| C | -0.85703600 | 4.84981500  | -0.36351100 |
| C | 1.48708900  | 4.46303200  | 0.03712000  |
| C | -0.56897600 | 6.12464400  | -0.84535200 |
| H | -1.88497000 | 4.49874200  | -0.34411200 |
| C | 1.77470600  | 5.74424800  | -0.43701600 |
| H | 2.29731000  | 3.82275800  | 0.37053100  |
| C | 0.75183100  | 6.57956200  | -0.88604100 |
| H | -1.37702800 | 6.76652200  | -1.18843200 |
| H | 2.80639000  | 6.08759700  | -0.46180600 |
| H | 0.97869800  | 7.57494900  | -1.25854100 |
| C | -1.01406700 | -0.11489300 | 6.18141400  |
| C | -2.24373200 | 0.26595100  | 6.72284800  |
| C | -3.33937700 | 0.47711100  | 5.88247600  |
| C | -3.21237200 | 0.30638000  | 4.50743500  |
| C | -1.97720300 | -0.07924500 | 3.95518200  |
| C | -0.87652600 | -0.28719600 | 4.80752500  |
| H | -0.15864700 | -0.27546100 | 6.83120100  |
| H | -2.34740800 | 0.40075000  | 7.79548500  |

|   |             |             |             |
|---|-------------|-------------|-------------|
| H | -4.29567000 | 0.77776700  | 6.30025800  |
| H | -4.05769700 | 0.46931700  | 3.84722800  |
| H | 0.07928000  | -0.56810600 | 4.37896800  |
| C | -1.84427900 | -0.28096200 | 2.55325000  |
| C | -1.72293300 | -0.42279100 | 1.35495300  |
| C | -1.51051600 | -0.87454800 | -0.03099000 |
| O | -0.74736600 | -0.11667800 | -0.84035000 |
| O | -2.72579500 | -1.33445600 | -0.60989300 |
| C | -3.75647000 | -0.33296500 | -0.67674400 |
| H | -4.17769100 | -0.15774000 | 0.32070300  |
| H | -3.36028400 | 0.59930700  | -1.08742700 |
| H | -4.52569000 | -0.74497600 | -1.33300200 |

**S3**

|   |             |             |             |
|---|-------------|-------------|-------------|
| P | -0.68197500 | -2.45321300 | 0.28244700  |
| C | -0.68862700 | -1.50040200 | 1.86713600  |
| C | -2.04795700 | -0.85838600 | 2.18702200  |
| H | 0.08383300  | -0.73020500 | 1.80308400  |
| H | -0.39946700 | -2.18750800 | 2.67025000  |
| C | -1.90681800 | 0.27455800  | 3.20824400  |
| H | -2.50556500 | -0.46546500 | 1.27380200  |
| H | -2.73776800 | -1.61869600 | 2.57438900  |
| C | -3.25570300 | 0.87886400  | 3.60294100  |
| H | -1.39729500 | -0.10416500 | 4.10580000  |
| H | -1.25594300 | 1.04789500  | 2.78368300  |
| H | -3.13476100 | 1.69779100  | 4.32053600  |
| H | -3.78071300 | 1.27752900  | 2.72646200  |
| H | -3.90914000 | 0.12565100  | 4.06009200  |
| C | -2.16317400 | -3.57810900 | 0.55688300  |
| C | -2.12387900 | -4.48196700 | 1.79377900  |
| H | -2.24312700 | -4.17798400 | -0.35767400 |
| H | -3.05556700 | -2.94118400 | 0.58006700  |
| C | -3.36862200 | -5.37125600 | 1.94854700  |
| H | -1.23505800 | -5.12719700 | 1.76151800  |
| H | -2.02216100 | -3.86819500 | 2.69783200  |
| C | -3.53060100 | -6.41021600 | 0.83566100  |
| H | -3.31364800 | -5.88737200 | 2.91650400  |
| H | -4.26190800 | -4.73280600 | 1.98961600  |
| H | -3.67967000 | -5.93865500 | -0.14143200 |
| H | -2.64132400 | -7.04930000 | 0.76471100  |
| H | -4.39337900 | -7.05869900 | 1.02371200  |
| C | 0.66873800  | -3.72408600 | 0.20230200  |
| C | 1.49105500  | -3.85084100 | 1.49033300  |
| H | 1.31812200  | -3.43442800 | -0.62691900 |
| H | 0.21124000  | -4.68785300 | -0.05174400 |

|   |             |             |             |
|---|-------------|-------------|-------------|
| C | 2.65352500  | -4.83552800 | 1.32856000  |
| H | 1.89058100  | -2.86849100 | 1.76634000  |
| H | 0.85662400  | -4.17334300 | 2.32608500  |
| C | 3.54872500  | -4.90062700 | 2.56756000  |
| H | 2.25410100  | -5.83415300 | 1.10403600  |
| H | 3.24929600  | -4.53760200 | 0.45671600  |
| H | 2.98044000  | -5.20880400 | 3.45362100  |
| H | 4.36943800  | -5.61389300 | 2.43266900  |
| H | 3.99013900  | -3.91986000 | 2.78494500  |
| P | 1.74141300  | 0.89649100  | 0.00891800  |
| B | -0.88327200 | 2.56303300  | 0.07192700  |
| O | -1.57647200 | 3.64965500  | -0.39920800 |
| O | -0.17477000 | 2.84347300  | 1.21749900  |
| C | -1.14730300 | 4.81917900  | 0.34617000  |
| C | -0.51509500 | 4.18975500  | 1.64568200  |
| C | -0.13006000 | 5.55423300  | -0.52831100 |
| C | -2.36802500 | 5.70212900  | 0.58450700  |
| C | -1.51193500 | 4.04285400  | 2.79799500  |
| C | 0.76033300  | 4.86614000  | 2.13755400  |
| H | -0.59451500 | 5.78547900  | -1.49132200 |
| H | 0.19053100  | 6.49236200  | -0.06332700 |
| H | 0.74998200  | 4.93987800  | -0.71934300 |
| H | -2.74741700 | 6.06207800  | -0.37662300 |
| H | -3.17202800 | 5.15378600  | 1.07949300  |
| H | -2.10693100 | 6.57300500  | 1.19609200  |
| H | -2.42213200 | 3.53047400  | 2.47437200  |
| H | -1.05396800 | 3.44528700  | 3.59136200  |
| H | -1.78991600 | 5.01638500  | 3.21414900  |
| H | 1.53767200  | 4.85380200  | 1.37170600  |
| H | 0.56363700  | 5.90416900  | 2.42804600  |
| H | 1.13870600  | 4.33162800  | 3.01434400  |
| C | 3.04215200  | -0.24181100 | -0.65065400 |
| C | 3.57238400  | -1.17282600 | 0.25103700  |
| C | 3.58775000  | -0.17314500 | -1.94041300 |
| C | 4.58273700  | -2.05462000 | -0.13707400 |
| H | 3.19939700  | -1.19332100 | 1.27101200  |
| C | 4.59939300  | -1.04711600 | -2.33027100 |
| H | 3.21662000  | 0.56638700  | -2.64237200 |
| C | 5.09316100  | -1.99856300 | -1.43336600 |
| H | 4.98241500  | -2.76867300 | 0.57770900  |
| H | 5.00790000  | -0.98540600 | -3.33572500 |
| H | 5.88440300  | -2.67767700 | -1.73891400 |
| C | 2.09735300  | 2.38447300  | -1.03042900 |
| C | 3.09740200  | 3.25276000  | -0.56508900 |

|   |             |             |             |
|---|-------------|-------------|-------------|
| C | 1.48510500  | 2.66919200  | -2.25911800 |
| C | 3.49064500  | 4.36052100  | -1.31552100 |
| H | 3.57129400  | 3.05263300  | 0.39264800  |
| C | 1.87699400  | 3.77789200  | -3.01127600 |
| H | 0.68653000  | 2.03149200  | -2.61981100 |
| C | 2.88299000  | 4.62438600  | -2.54509700 |
| H | 4.26743500  | 5.02038900  | -0.93864600 |
| H | 1.38983400  | 3.98141000  | -3.96102500 |
| H | 3.18458700  | 5.48928000  | -3.12919900 |
| C | -4.73015900 | 0.96847400  | -1.02987400 |
| C | -4.85817900 | 0.38826300  | -2.29311300 |
| C | -3.70906600 | 0.07024400  | -3.01731100 |
| C | -2.44827100 | 0.30990200  | -2.47692000 |
| C | -2.29644000 | 0.86818900  | -1.19876400 |
| C | -3.46701100 | 1.21660300  | -0.50022300 |
| H | -5.61543800 | 1.23495100  | -0.45842300 |
| H | -5.84228500 | 0.19824900  | -2.71262100 |
| H | -3.79341900 | -0.36627300 | -4.00914800 |
| H | -1.56402800 | 0.07774800  | -3.05638700 |
| H | -3.38204500 | 1.68678200  | 0.47501300  |
| C | -0.96481400 | 1.15721700  | -0.60553500 |
| C | 0.10836900  | 0.30248300  | -0.68429600 |
| C | 0.06829200  | -1.14774200 | -0.94408000 |
| O | -1.29780000 | -1.76372900 | -1.07805400 |
| O | 0.93119400  | -1.67912100 | -1.88869300 |
| C | 0.73784000  | -1.25007700 | -3.23023800 |
| H | 0.79094100  | -0.15690600 | -3.30784800 |
| H | 1.54919800  | -1.68992700 | -3.81427300 |
| H | -0.22686500 | -1.59820000 | -3.61760700 |

#### S4R

|   |             |             |             |
|---|-------------|-------------|-------------|
| P | 1.49369600  | -1.31684500 | -1.09840000 |
| B | -2.38179700 | -0.45929900 | -0.62008700 |
| O | -2.70045600 | 0.56061100  | 0.24633600  |
| O | -3.46447000 | -0.99322300 | -1.27213400 |
| C | -4.08839200 | 0.90402500  | -0.02021900 |
| C | -4.64427900 | -0.43253400 | -0.63652100 |
| C | -4.74103100 | 1.33353600  | 1.28706100  |
| C | -4.07167900 | 2.06446000  | -1.01936700 |
| C | -5.72575500 | -0.25059300 | -1.69397500 |
| C | -5.09768100 | -1.43760700 | 0.42633200  |
| H | -4.27528100 | 2.25675000  | 1.64564400  |
| H | -5.80957300 | 1.52598600  | 1.14029500  |
| H | -4.62442400 | 0.57269700  | 2.06129600  |
| H | -5.08226900 | 2.42622100  | -1.23322200 |

|   |             |             |             |
|---|-------------|-------------|-------------|
| H | -3.49178900 | 2.88967900  | -0.59560400 |
| H | -3.60012300 | 1.76675500  | -1.96076100 |
| H | -6.03606600 | -1.22866300 | -2.07396500 |
| H | -6.60519800 | 0.24427100  | -1.26701800 |
| H | -5.36459500 | 0.34112300  | -2.53750800 |
| H | -4.33167800 | -1.56798700 | 1.19701400  |
| H | -6.02826900 | -1.12234400 | 0.90888900  |
| H | -5.26520400 | -2.40641000 | -0.05281200 |
| C | 1.53231000  | -0.77724500 | -2.86299700 |
| C | 2.76173600  | -0.57224000 | -3.50842900 |
| C | 0.35398100  | -0.70405600 | -3.62330000 |
| C | 2.81195300  | -0.28014200 | -4.87150200 |
| H | 3.68645100  | -0.63170000 | -2.94271600 |
| C | 0.40790400  | -0.40466100 | -4.98343200 |
| H | -0.60480000 | -0.87346800 | -3.14770900 |
| C | 1.63469300  | -0.19017800 | -5.61376400 |
| H | 3.77411400  | -0.12051000 | -5.35109900 |
| H | -0.51530100 | -0.34014000 | -5.55332800 |
| H | 1.67266000  | 0.04045000  | -6.67487400 |
| C | 2.86872300  | -0.32926300 | -0.36199200 |
| C | 3.14162100  | 1.00372800  | -0.70842700 |
| C | 3.61639500  | -0.92933900 | 0.65950800  |
| C | 4.13015400  | 1.71971400  | -0.03581200 |
| H | 2.57086800  | 1.47353300  | -1.50137600 |
| C | 4.60949300  | -0.21421700 | 1.33187800  |
| H | 3.40878200  | -1.95912000 | 0.93654800  |
| C | 4.86470600  | 1.11340900  | 0.98741400  |
| H | 4.32969700  | 2.75252400  | -0.30906800 |
| H | 5.18020500  | -0.69349700 | 2.12259300  |
| H | 5.63700600  | 1.67316900  | 1.50816100  |
| C | 0.28136600  | -0.87124300 | 5.90126700  |
| C | 1.50936400  | -0.34338100 | 6.30616600  |
| C | 2.38127000  | 0.19710700  | 5.35810500  |
| C | 2.03297900  | 0.21238800  | 4.01086100  |
| C | 0.79590200  | -0.31742500 | 3.59715400  |
| C | -0.07772800 | -0.85994300 | 4.55654300  |
| H | -0.39859700 | -1.29288600 | 6.63600100  |
| H | 1.78589700  | -0.35387700 | 7.35657400  |
| H | 3.33769200  | 0.60722500  | 5.67005600  |
| H | 2.70645600  | 0.62226300  | 3.26569200  |
| H | -1.03004200 | -1.26792600 | 4.23348000  |
| C | 0.44778100  | -0.29994200 | 2.21627300  |
| C | 0.16860900  | -0.25868800 | 1.03800700  |
| C | 0.03649100  | -0.24526900 | -0.41472000 |



|            |             |             |             |
|------------|-------------|-------------|-------------|
| O          | -1.12899400 | -0.94946100 | -0.84679100 |
| O          | 0.04054800  | 1.04041100  | -0.98667500 |
| C          | -0.04483700 | 2.17797500  | -0.12373200 |
| H          | 0.85576800  | 2.27448800  | 0.49134700  |
| H          | -0.11714800 | 3.03439400  | -0.79856500 |
| H          | -0.93110600 | 2.12770000  | 0.51211000  |
| <b>S4S</b> |             |             |             |
| P          | -1.68964400 | 1.83114800  | 0.51270600  |
| B          | -0.06618300 | -1.09464500 | -1.14951800 |
| O          | 0.98556100  | -1.12726200 | -0.26830300 |
| O          | -0.27795700 | -2.28534500 | -1.80389500 |
| C          | 1.70394700  | -2.36298000 | -0.53127900 |
| C          | 0.58789200  | -3.26613500 | -1.17437700 |
| C          | 2.83491300  | -2.01364000 | -1.50336100 |
| C          | 2.27239700  | -2.88510900 | 0.78191200  |
| C          | -0.25689300 | -4.00647300 | -0.13418000 |
| C          | 1.08327000  | -4.23213900 | -2.24370200 |
| H          | 2.43722000  | -1.64344100 | -2.45337800 |
| H          | 3.44924000  | -1.22336600 | -1.06280600 |
| H          | 3.47293300  | -2.87958600 | -1.70684900 |
| H          | 2.72505800  | -3.87274900 | 0.63958300  |
| H          | 3.05112600  | -2.20604500 | 1.14314400  |
| H          | 1.49983600  | -2.95181000 | 1.54920100  |
| H          | -0.60810000 | -3.32218800 | 0.64225100  |
| H          | -1.12988900 | -4.43898200 | -0.63205900 |
| H          | 0.30762900  | -4.81541800 | 0.34077900  |
| H          | 0.23873300  | -4.80117000 | -2.64442300 |
| H          | 1.55920200  | -3.70344900 | -3.07209000 |
| H          | 1.80230100  | -4.94223100 | -1.82010800 |
| C          | -1.08445200 | 0.49140500  | 1.62801500  |
| C          | 0.09666700  | 0.73291100  | 2.34691400  |
| C          | -1.74965500 | -0.72834700 | 1.81084700  |
| C          | 0.61574200  | -0.23187700 | 3.20736300  |
| H          | 0.61312500  | 1.68028200  | 2.22462500  |
| C          | -1.24146100 | -1.68557700 | 2.69023700  |
| H          | -2.66980500 | -0.92577000 | 1.27079900  |
| C          | -0.05502000 | -1.44361400 | 3.38446600  |
| H          | 1.53538300  | -0.03182800 | 3.75081100  |
| H          | -1.77503800 | -2.62149700 | 2.83416800  |
| H          | 0.33753800  | -2.18968200 | 4.07025700  |
| C          | -3.41979900 | 1.29075200  | 0.17561800  |
| C          | -3.84260700 | 0.45072700  | -0.86615000 |
| C          | -4.38002000 | 1.79192700  | 1.06993200  |
| C          | -5.19170800 | 0.11890200  | -0.99697000 |

|   |             |             |             |
|---|-------------|-------------|-------------|
| H | -3.12056800 | 0.05757800  | -1.56901100 |
| C | -5.72473700 | 1.44641400  | 0.94532500  |
| H | -4.07004100 | 2.46068100  | 1.86957000  |
| C | -6.13461800 | 0.60855500  | -0.09235500 |
| H | -5.50509800 | -0.53072400 | -1.80997000 |
| H | -6.45140400 | 1.83942900  | 1.65115000  |
| H | -7.18300800 | 0.34340400  | -0.19852100 |
| C | 4.87932400  | 1.00373400  | 1.35185200  |
| C | 5.77170200  | 1.98597700  | 0.91412200  |
| C | 5.35298200  | 2.94537700  | -0.01024900 |
| C | 4.04945000  | 2.92803000  | -0.50021900 |
| C | 3.14907600  | 1.94129100  | -0.06575000 |
| C | 3.57467600  | 0.97616200  | 0.86901500  |
| H | 5.20207500  | 0.25749600  | 2.07267000  |
| H | 6.78945400  | 2.00467000  | 1.29315800  |
| H | 6.04466400  | 3.71080800  | -0.35016000 |
| H | 3.71776700  | 3.67135100  | -1.21806100 |
| H | 2.86519400  | 0.22379600  | 1.19518600  |
| C | 1.80804900  | 1.87342600  | -0.53905800 |
| C | 0.65973000  | 1.68527500  | -0.87440300 |
| C | -0.74615100 | 1.33290600  | -1.08545200 |
| O | -0.87952300 | -0.03900600 | -1.44730000 |
| O | -1.37105500 | 2.09806200  | -2.07495200 |
| C | -0.77269200 | 2.01178300  | -3.36775700 |
| H | 0.27440100  | 2.33886900  | -3.33582900 |
| H | -0.82535700 | 0.98959000  | -3.75653300 |
| H | -1.34865200 | 2.68203900  | -4.00794000 |

**S5R**

|   |             |             |             |
|---|-------------|-------------|-------------|
| P | -0.44453700 | -1.59939100 | 1.62826700  |
| C | 0.52974000  | -2.04375400 | 0.14851800  |
| C | 1.30043700  | -3.36611300 | 0.23954100  |
| H | 1.22488500  | -1.20776800 | 0.00238300  |
| H | -0.16234200 | -2.05396000 | -0.70003200 |
| C | 2.05433400  | -3.65001800 | -1.06540600 |
| H | 2.02057700  | -3.32143500 | 1.06621600  |
| H | 0.62303900  | -4.20368800 | 0.45650900  |
| C | 2.85893000  | -4.94995100 | -1.01393200 |
| H | 1.33437100  | -3.68921600 | -1.89451700 |
| H | 2.72186000  | -2.80490600 | -1.27884800 |
| H | 3.60693000  | -4.91889700 | -0.21270400 |
| H | 2.20739400  | -5.81239600 | -0.82745600 |
| H | 3.38725100  | -5.12806400 | -1.95662400 |
| C | 0.71552600  | -1.63401100 | 3.03796100  |
| C | 0.20134900  | -1.01537200 | 4.34862400  |

|   |             |             |             |
|---|-------------|-------------|-------------|
| H | 1.56539500  | -1.05187900 | 2.65964500  |
| H | 1.04701000  | -2.66878200 | 3.17868200  |
| C | 1.34673200  | -0.72684100 | 5.32863300  |
| H | -0.31541800 | -0.08167900 | 4.11960900  |
| H | -0.52592100 | -1.68628800 | 4.82033700  |
| C | 2.13438100  | -1.96733400 | 5.75899200  |
| H | 2.02676400  | 0.00312700  | 4.87001800  |
| H | 0.92487400  | -0.23816600 | 6.21614300  |
| H | 1.47263900  | -2.72177100 | 6.20341100  |
| H | 2.65089600  | -2.43414000 | 4.91244500  |
| H | 2.89567100  | -1.71178700 | 6.50380400  |
| C | -1.80911900 | -2.81603500 | 1.77324000  |
| C | -2.61109900 | -2.78069900 | 3.08044000  |
| H | -1.37892100 | -3.81222200 | 1.60691500  |
| H | -2.46216900 | -2.59329400 | 0.92059100  |
| C | -3.83923800 | -3.69449600 | 3.01146600  |
| H | -1.97279400 | -3.09190000 | 3.91672100  |
| H | -2.92424200 | -1.75206100 | 3.27996800  |
| C | -4.65043200 | -3.67929100 | 4.30873900  |
| H | -4.47365400 | -3.37534300 | 2.17366300  |
| H | -3.52183500 | -4.72206600 | 2.78424100  |
| H | -4.04736800 | -4.02605300 | 5.15660400  |
| H | -4.99796100 | -2.66585800 | 4.54145100  |
| H | -5.53031000 | -4.32766000 | 4.23693900  |
| P | -2.69520700 | -0.18248400 | -0.82213600 |
| B | 0.89785500  | 1.46750700  | 0.79254800  |
| O | 1.37291500  | 2.80903200  | 0.95620900  |
| O | 2.08590400  | 0.59319000  | 0.76607100  |
| C | 2.73130900  | 2.75027900  | 1.39687900  |
| C | 3.24976600  | 1.42327300  | 0.73393300  |
| C | 3.44899000  | 4.01518400  | 0.93284600  |
| C | 2.73580600  | 2.67813900  | 2.93273600  |
| C | 4.36808400  | 0.71762700  | 1.49969600  |
| C | 3.67002100  | 1.62263000  | -0.72945900 |
| H | 3.32330200  | 4.16328900  | -0.14204500 |
| H | 3.02814900  | 4.88696100  | 1.44517300  |
| H | 4.52058700  | 3.97046300  | 1.16123900  |
| H | 2.17164800  | 3.53111600  | 3.32263600  |
| H | 2.24041100  | 1.76530600  | 3.27595800  |
| H | 3.74928500  | 2.71231900  | 3.34877200  |
| H | 4.64818500  | -0.20342600 | 0.97581400  |
| H | 5.26108400  | 1.34946400  | 1.57228400  |
| H | 4.04916300  | 0.44866900  | 2.50999200  |
| H | 4.62341500  | 2.15675100  | -0.81241800 |

|   |             |             |             |
|---|-------------|-------------|-------------|
| H | 3.78301800  | 0.63978400  | -1.19935000 |
| H | 2.90874100  | 2.17349000  | -1.28588900 |
| C | -3.87092500 | 1.23458600  | -0.73140200 |
| C | -3.45877800 | 2.57494000  | -0.77967800 |
| C | -5.23843700 | 0.95094000  | -0.62057800 |
| C | -4.39627700 | 3.60594600  | -0.72548100 |
| H | -2.40098700 | 2.80536800  | -0.85541900 |
| C | -6.17738500 | 1.98197600  | -0.56745100 |
| H | -5.56619200 | -0.08426300 | -0.57142700 |
| C | -5.75740600 | 3.31151000  | -0.61903700 |
| H | -4.06342500 | 4.63964300  | -0.76442600 |
| H | -7.23478400 | 1.74734900  | -0.48004900 |
| H | -6.48661400 | 4.11564000  | -0.57275300 |
| C | -2.31827500 | -0.26441300 | -2.62665900 |
| C | -1.84860600 | -1.49283000 | -3.11543800 |
| C | -2.49304000 | 0.79427900  | -3.52699600 |
| C | -1.51482400 | -1.64819600 | -4.46036200 |
| H | -1.74816300 | -2.33563200 | -2.43465900 |
| C | -2.17342300 | 0.63700200  | -4.87354000 |
| H | -2.86044000 | 1.75028400  | -3.17219600 |
| C | -1.67580000 | -0.57976500 | -5.34296800 |
| H | -1.14238300 | -2.60367300 | -4.82034600 |
| H | -2.29653100 | 1.47341900  | -5.55545200 |
| H | -1.42082100 | -0.69611000 | -6.39269000 |
| C | 1.12189100  | 1.21456900  | -4.04954400 |
| C | 1.07235900  | 2.57451200  | -4.36100700 |
| C | 0.63316300  | 3.48451500  | -3.39801000 |
| C | 0.24099400  | 3.03868000  | -2.13623500 |
| C | 0.24532900  | 1.66880000  | -1.83112100 |
| C | 0.71386900  | 0.76628600  | -2.79671500 |
| H | 1.46791000  | 0.49742100  | -4.78858400 |
| H | 1.38434300  | 2.92330000  | -5.34166400 |
| H | 0.61045600  | 4.54757000  | -3.62353200 |
| H | -0.05078400 | 3.74599500  | -1.36636100 |
| H | 0.74411400  | -0.29177900 | -2.56257100 |
| C | -0.11095300 | 1.22371100  | -0.47749300 |
| C | -1.19100100 | 0.53734800  | -0.05645800 |
| C | -1.01380100 | 0.22772100  | 1.43353000  |
| O | -0.00801800 | 0.98754100  | 1.92992400  |
| O | -2.19430700 | 0.27604000  | 2.21316000  |
| C | -2.58294600 | 1.60755900  | 2.57403700  |
| H | -1.84557600 | 2.05797300  | 3.24307500  |
| H | -2.70185900 | 2.23723100  | 1.68820300  |
| H | -3.54602100 | 1.50359200  | 3.07720300  |

**S5S**

|   |             |             |             |
|---|-------------|-------------|-------------|
| P | -0.63122700 | -2.15781500 | 1.23200400  |
| C | -1.84395400 | -3.37196900 | 0.56657700  |
| C | -1.59096700 | -3.92093300 | -0.84428700 |
| H | -2.80496600 | -2.84810300 | 0.58419500  |
| H | -1.89639100 | -4.18729300 | 1.30209800  |
| C | -2.75975300 | -4.78310900 | -1.32964700 |
| H | -1.44000800 | -3.08888600 | -1.53402000 |
| H | -0.66278000 | -4.50372900 | -0.86478700 |
| C | -2.54389000 | -5.28392100 | -2.75974600 |
| H | -2.90772600 | -5.63519200 | -0.65120800 |
| H | -3.68357300 | -4.18913500 | -1.28316100 |
| H | -3.39179900 | -5.88485600 | -3.10626700 |
| H | -2.41882600 | -4.44133100 | -3.44967600 |
| H | -1.64268200 | -5.90491700 | -2.82835800 |
| C | 0.76439600  | -3.03859500 | 2.01856500  |
| C | 1.67874500  | -3.80119700 | 1.05175400  |
| H | 0.34291700  | -3.70613000 | 2.78165000  |
| H | 1.33683800  | -2.25993600 | 2.53122300  |
| C | 2.87722300  | -4.41787000 | 1.77942600  |
| H | 1.11355600  | -4.58900300 | 0.53790500  |
| H | 2.02893000  | -3.11074000 | 0.28018700  |
| C | 3.81443300  | -5.16442400 | 0.82810600  |
| H | 3.43057600  | -3.61977500 | 2.29248600  |
| H | 2.52149800  | -5.10141000 | 2.56345300  |
| H | 4.20714500  | -4.49065000 | 0.05758800  |
| H | 4.66734400  | -5.59441100 | 1.36409900  |
| H | 3.29150700  | -5.98276800 | 0.31832000  |
| C | -1.51148400 | -1.23148100 | 2.54058900  |
| C | -0.60251300 | -0.41845600 | 3.47978800  |
| H | -2.13401300 | -1.94495200 | 3.09483400  |
| H | -2.19844700 | -0.57042900 | 2.00165000  |
| C | -1.34543600 | 0.76975300  | 4.09899500  |
| H | -0.22066600 | -1.07661400 | 4.27157300  |
| H | 0.26606900  | -0.02587100 | 2.94640900  |
| C | -0.43702100 | 1.58832000  | 5.01788000  |
| H | -1.70401900 | 1.41315500  | 3.28389300  |
| H | -2.23568100 | 0.42366500  | 4.64363700  |
| H | -0.96061200 | 2.46141300  | 5.42297800  |
| H | -0.08461700 | 0.98647100  | 5.86490300  |
| H | 0.43837900  | 1.93453600  | 4.45977900  |
| P | -2.39898700 | -0.18290300 | -0.89657400 |
| B | 1.33905700  | 1.06880300  | 0.74106200  |
| O | 2.43830900  | 1.53328800  | -0.07460900 |

|   |             |             |             |
|---|-------------|-------------|-------------|
| O | 1.59637600  | 1.51981400  | 2.09801500  |
| C | 3.32451900  | 2.30828100  | 0.73180800  |
| C | 2.99583500  | 1.81092200  | 2.18661700  |
| C | 4.76000000  | 2.03582300  | 0.28147700  |
| C | 2.99440500  | 3.79431200  | 0.52578300  |
| C | 3.21264300  | 2.85134500  | 3.28230400  |
| C | 3.73519800  | 0.51158100  | 2.54732400  |
| H | 4.97646900  | 0.96513100  | 0.28330100  |
| H | 4.90041200  | 2.40629900  | -0.73971500 |
| H | 5.48478000  | 2.54404200  | 0.92917500  |
| H | 1.98669500  | 4.02646200  | 0.87824900  |
| H | 3.70811000  | 4.45148400  | 1.03623800  |
| H | 3.03115800  | 4.01115200  | -0.54665100 |
| H | 4.25915500  | 3.17638300  | 3.31614100  |
| H | 2.58050900  | 3.72772900  | 3.12176300  |
| H | 2.96046700  | 2.42389700  | 4.25930500  |
| H | 3.60665700  | -0.23774200 | 1.76165100  |
| H | 4.80627400  | 0.67789100  | 2.70763200  |
| H | 3.30725300  | 0.11220300  | 3.47369400  |
| C | -3.43221400 | 1.33128700  | -0.80560900 |
| C | -4.06951800 | 1.87692400  | -1.92651300 |
| C | -3.65315000 | 1.91747300  | 0.45047300  |
| C | -4.88468400 | 3.00235600  | -1.79734300 |
| H | -3.91380700 | 1.43562700  | -2.90545100 |
| C | -4.44970400 | 3.05047800  | 0.57468400  |
| H | -3.16709600 | 1.50869100  | 1.33176000  |
| C | -5.06796500 | 3.59912700  | -0.55121900 |
| H | -5.36559100 | 3.42015800  | -2.67792000 |
| H | -4.57816900 | 3.51309700  | 1.54882200  |
| H | -5.68808900 | 4.48583000  | -0.45499700 |
| C | -2.14310100 | -0.42165100 | -2.70229300 |
| C | -1.17440800 | 0.27170400  | -3.43992600 |
| C | -2.95145300 | -1.35917400 | -3.36103100 |
| C | -1.01522300 | 0.03064900  | -4.80383500 |
| H | -0.53343600 | 0.98808600  | -2.93761700 |
| C | -2.79918500 | -1.59643000 | -4.72792700 |
| H | -3.70101800 | -1.90827200 | -2.79655900 |
| C | -1.82709800 | -0.90347900 | -5.45100300 |
| H | -0.25557500 | 0.57149300  | -5.36159200 |
| H | -3.43430800 | -2.32466700 | -5.22492200 |
| H | -1.70040700 | -1.09226200 | -6.51334100 |
| C | -1.65120900 | 4.68899500  | -1.06826300 |
| C | -1.65240800 | 5.43401500  | 0.11220900  |
| C | -1.13466400 | 4.87316200  | 1.28061400  |

|   |             |             |             |
|---|-------------|-------------|-------------|
| C | -0.62407400 | 3.57668300  | 1.26997200  |
| C | -0.65698200 | 2.80220600  | 0.09633300  |
| C | -1.15982300 | 3.38669100  | -1.07526300 |
| H | -2.04891100 | 5.11741100  | -1.98389700 |
| H | -2.04700300 | 6.44647700  | 0.11834500  |
| H | -1.11733400 | 5.45065800  | 2.20139200  |
| H | -0.18663300 | 3.14276600  | 2.16212500  |
| H | -1.17759800 | 2.81058900  | -1.99286700 |
| C | -0.14781600 | 1.42575300  | 0.15490700  |
| C | -0.74691000 | 0.29099200  | -0.27018700 |
| C | 0.16101500  | -0.90233700 | 0.03368400  |
| O | 1.27927400  | -0.47854700 | 0.66614800  |
| O | 0.42707800  | -1.71837600 | -1.10925000 |
| C | 1.47197200  | -1.19355400 | -1.93638800 |
| H | 1.40460000  | -1.74169500 | -2.87795700 |
| H | 1.34039900  | -0.12368500 | -2.11673400 |
| H | 2.44937400  | -1.34100900 | -1.46910800 |

**S6**

|   |             |             |             |
|---|-------------|-------------|-------------|
| P | 0.65238600  | -1.36019300 | 1.94288600  |
| C | -1.03999100 | -0.89837800 | 2.36060400  |
| C | -1.63235900 | -1.66799700 | 3.55239500  |
| H | -1.64720000 | -1.07501700 | 1.46928500  |
| H | -1.06106100 | 0.18612400  | 2.51416600  |
| C | -3.12579400 | -1.34091400 | 3.69225500  |
| H | -1.51691900 | -2.75072500 | 3.40342500  |
| H | -1.10642700 | -1.42012400 | 4.48465600  |
| C | -3.78370500 | -2.08844700 | 4.85254500  |
| H | -3.24148900 | -0.25800400 | 3.82679500  |
| H | -3.63278200 | -1.57950600 | 2.74937600  |
| H | -4.84704900 | -1.83792800 | 4.92756400  |
| H | -3.70687800 | -3.17463800 | 4.71892900  |
| H | -3.31263600 | -1.83695200 | 5.81100300  |
| C | 0.73262400  | -3.13336100 | 1.53203700  |
| C | -0.31252600 | -3.59375500 | 0.50198800  |
| H | 0.62093200  | -3.68363100 | 2.47585100  |
| H | 1.74538300  | -3.31896000 | 1.15818500  |
| C | -0.24629500 | -5.10163100 | 0.24755600  |
| H | -1.32005500 | -3.32262200 | 0.83750300  |
| H | -0.14842600 | -3.05991200 | -0.43702700 |
| C | -1.27677400 | -5.53840400 | -0.79649400 |
| H | 0.76342800  | -5.36891000 | -0.09270000 |
| H | -0.41197700 | -5.64389100 | 1.18955700  |
| H | -1.11000800 | -5.02005000 | -1.74749600 |
| H | -1.22353200 | -6.61621800 | -0.98343900 |

|   |             |             |             |
|---|-------------|-------------|-------------|
| H | -2.29514600 | -5.30281000 | -0.46555000 |
| C | 1.74072900  | -1.00491700 | 3.35351400  |
| C | 3.22934200  | -1.25729000 | 3.07788100  |
| H | 1.38432900  | -1.60055600 | 4.20306400  |
| H | 1.57297600  | 0.04827200  | 3.60905200  |
| C | 4.10673400  | -0.87596900 | 4.27475200  |
| H | 3.39072200  | -2.31455000 | 2.82900600  |
| H | 3.53180200  | -0.67681800 | 2.19938900  |
| C | 5.59386400  | -1.11588200 | 4.00683100  |
| H | 3.93943000  | 0.18193200  | 4.51796300  |
| H | 3.78994100  | -1.44958600 | 5.15662000  |
| H | 6.20326200  | -0.83340200 | 4.87152500  |
| H | 5.79109600  | -2.17227800 | 3.78892900  |
| H | 5.93858100  | -0.52881600 | 3.14754200  |
| P | -0.35790200 | -0.75643700 | -2.99589400 |
| B | -0.57115800 | 1.78279700  | 0.17172000  |
| O | 0.69514300  | 2.32123600  | -0.14143800 |
| O | -1.19307200 | 2.58531000  | 1.14796800  |
| C | 0.98480100  | 3.35984700  | 0.80245700  |
| C | -0.45098800 | 3.81708900  | 1.23458700  |
| C | 1.77326400  | 2.72772200  | 1.95921200  |
| C | 1.82971200  | 4.42677100  | 0.11422500  |
| C | -1.07825400 | 4.80185700  | 0.24012700  |
| C | -0.56043200 | 4.35946800  | 2.65545900  |
| H | 1.14814300  | 2.00572800  | 2.49330600  |
| H | 2.63413200  | 2.19320900  | 1.54661800  |
| H | 2.12882900  | 3.47685200  | 2.67472600  |
| H | 1.34585500  | 4.78264400  | -0.79791500 |
| H | 2.00515500  | 5.28178900  | 0.77717600  |
| H | 2.80195700  | 4.00474600  | -0.16228700 |
| H | -0.61188000 | 5.79141300  | 0.29349600  |
| H | -0.98983500 | 4.42601400  | -0.78365800 |
| H | -2.14258800 | 4.90600900  | 0.47096800  |
| H | -0.25601200 | 3.61280900  | 3.39303000  |
| H | 0.06271300  | 5.25212600  | 2.78290500  |
| H | -1.59848800 | 4.63604300  | 2.86593900  |
| C | -1.80579100 | 0.30311900  | -3.41710000 |
| C | -1.81943300 | 1.69504800  | -3.24887300 |
| C | -2.97015400 | -0.33597700 | -3.85784800 |
| C | -2.97769500 | 2.42556700  | -3.50643200 |
| H | -0.92611300 | 2.20623900  | -2.91135100 |
| C | -4.13110300 | 0.39297100  | -4.11815200 |
| H | -2.97081400 | -1.41628600 | -3.97577600 |
| C | -4.13676300 | 1.77531900  | -3.93572600 |



|   |             |             |             |
|---|-------------|-------------|-------------|
| H | -2.97910700 | 3.50330100  | -3.36412900 |
| H | -5.03064400 | -0.11911300 | -4.44856400 |
| H | -5.04156800 | 2.34632900  | -4.12745700 |
| C | 1.02457000  | 0.21648300  | -3.76000700 |
| C | 1.57535800  | 1.38308700  | -3.20305000 |
| C | 1.53244500  | -0.24721000 | -4.98134800 |
| C | 2.59886200  | 2.06523400  | -3.86246000 |
| H | 1.22708700  | 1.74932900  | -2.24267000 |
| C | 2.55612800  | 0.43585900  | -5.64037600 |
| H | 1.12281500  | -1.15595200 | -5.41540500 |
| C | 3.09268400  | 1.59607800  | -5.08193300 |
| H | 3.01205800  | 2.96783800  | -3.41816500 |
| H | 2.93701900  | 0.05858700  | -6.58599000 |
| H | 3.89105000  | 2.12952800  | -5.59124800 |
| C | -4.09855500 | -1.78961200 | -0.48344800 |
| C | -5.09318500 | -1.01216100 | 0.10911200  |
| C | -4.76738800 | 0.29848900  | 0.48722500  |
| C | -3.49642700 | 0.81658000  | 0.28490800  |
| C | -2.45763300 | 0.04640000  | -0.30859200 |
| C | -2.81627400 | -1.27993100 | -0.67875500 |
| H | -4.31639900 | -2.80880400 | -0.79843700 |
| H | -6.09267200 | -1.40694400 | 0.26835700  |
| H | -5.52676600 | 0.93044000  | 0.94417400  |
| H | -3.27737000 | 1.83249400  | 0.59089000  |
| H | -2.06705800 | -1.92090500 | -1.13261900 |
| C | -1.10273900 | 0.53245100  | -0.44107700 |
| C | -0.13469600 | -0.27935100 | -1.18375700 |
| C | 0.99087600  | -0.74462400 | -0.61997000 |
| O | 1.30942500  | -0.49078800 | 0.76713000  |
| O | 1.93803900  | -1.52876000 | -1.19338400 |
| C | 3.25426200  | -0.95588100 | -1.29719100 |
| H | 3.21427400  | 0.00231900  | -1.81996900 |
| H | 3.69376200  | -0.82340000 | -0.30192200 |
| H | 3.84693700  | -1.66987500 | -1.87146800 |

**S7Z**

|   |                 |                 |                 |
|---|-----------------|-----------------|-----------------|
| P | 6.387625000000  | -2.196869000000 | 0.642733000000  |
| B | 8.431729000000  | 1.119206000000  | -1.190577000000 |
| O | 9.745239000000  | 1.443858000000  | -0.979401000000 |
| O | 7.922834000000  | 1.599719000000  | -2.364513000000 |
| C | 10.111092000000 | 2.409553000000  | -2.007461000000 |
| C | 9.044375000000  | 2.129461000000  | -3.128992000000 |
| C | 9.968415000000  | 3.793074000000  | -1.367785000000 |
| C | 11.555299000000 | 2.151499000000  | -2.417346000000 |
| C | 9.461060000000  | 1.027348000000  | -4.106140000000 |

|   |                 |                 |                 |
|---|-----------------|-----------------|-----------------|
| C | 8.570524000000  | 3.363772000000  | -3.886521000000 |
| H | 8.936211000000  | 3.972441000000  | -1.052796000000 |
| H | 10.605588000000 | 3.839190000000  | -0.479672000000 |
| H | 10.271907000000 | 4.589014000000  | -2.055198000000 |
| H | 11.849913000000 | 2.814706000000  | -3.238362000000 |
| H | 12.218866000000 | 2.344548000000  | -1.568715000000 |
| H | 11.699342000000 | 1.116519000000  | -2.733814000000 |
| H | 9.801534000000  | 0.133434000000  | -3.578517000000 |
| H | 8.593752000000  | 0.745792000000  | -4.709785000000 |
| H | 10.256652000000 | 1.366754000000  | -4.777684000000 |
| H | 9.404247000000  | 3.833758000000  | -4.420197000000 |
| H | 7.815360000000  | 3.073321000000  | -4.623219000000 |
| H | 8.123993000000  | 4.100437000000  | -3.215477000000 |
| C | 7.597545000000  | -2.652591000000 | 1.965635000000  |
| C | 8.769837000000  | -1.942103000000 | 2.244255000000  |
| C | 7.282355000000  | -3.768795000000 | 2.756324000000  |
| C | 9.612750000000  | -2.343122000000 | 3.281838000000  |
| H | 9.029682000000  | -1.071692000000 | 1.652414000000  |
| C | 8.125575000000  | -4.170812000000 | 3.789847000000  |
| H | 6.376363000000  | -4.333862000000 | 2.553361000000  |
| C | 9.296230000000  | -3.458282000000 | 4.056948000000  |
| H | 10.521122000000 | -1.780610000000 | 3.480993000000  |
| H | 7.866541000000  | -5.040046000000 | 4.388375000000  |
| H | 9.954190000000  | -3.769466000000 | 4.863536000000  |
| C | 6.430118000000  | -3.747238000000 | -0.368461000000 |
| C | 7.554638000000  | -4.575242000000 | -0.503054000000 |
| C | 5.268454000000  | -4.066723000000 | -1.083335000000 |
| C | 7.524276000000  | -5.677265000000 | -1.352855000000 |
| H | 8.458713000000  | -4.343157000000 | 0.049740000000  |
| C | 5.235318000000  | -5.171272000000 | -1.936825000000 |
| H | 4.386716000000  | -3.439601000000 | -0.974105000000 |
| C | 6.365970000000  | -5.974748000000 | -2.076417000000 |
| H | 8.406729000000  | -6.302526000000 | -1.458366000000 |
| H | 4.328057000000  | -5.404370000000 | -2.487733000000 |
| H | 6.345318000000  | -6.833975000000 | -2.741348000000 |
| C | 10.119564000000 | -2.503061000000 | -2.678319000000 |
| C | 9.398671000000  | -2.852824000000 | -3.820035000000 |
| C | 8.025800000000  | -2.601408000000 | -3.875122000000 |
| C | 7.375127000000  | -2.016576000000 | -2.792416000000 |
| C | 8.089566000000  | -1.671576000000 | -1.637939000000 |
| C | 9.470237000000  | -1.911668000000 | -1.594032000000 |
| H | 11.188825000000 | -2.689540000000 | -2.628034000000 |
| H | 9.902372000000  | -3.316208000000 | -4.663605000000 |
| H | 7.458635000000  | -2.866211000000 | -4.762820000000 |

|            |                 |                 |                 |
|------------|-----------------|-----------------|-----------------|
| H          | 6.307602000000  | -1.829777000000 | -2.833697000000 |
| H          | 10.026683000000 | -1.639649000000 | -0.703201000000 |
| C          | 7.423505000000  | -1.084404000000 | -0.442842000000 |
| C          | 7.605573000000  | 0.235201000000  | -0.195617000000 |
| C          | 7.029073000000  | 0.873277000000  | 1.003840000000  |
| O          | 6.523872000000  | 0.308439000000  | 1.956958000000  |
| O          | 7.131595000000  | 2.225323000000  | 0.919962000000  |
| C          | 6.610901000000  | 2.949861000000  | 2.042345000000  |
| H          | 6.796447000000  | 4.001759000000  | 1.824087000000  |
| H          | 7.121279000000  | 2.649381000000  | 2.961317000000  |
| H          | 5.539824000000  | 2.762392000000  | 2.155030000000  |
| <b>S8S</b> |                 |                 |                 |
| P          | 4.393404000000  | 0.236746000000  | 0.284543000000  |
| C          | 5.283999000000  | 1.843223000000  | 0.355367000000  |
| C          | 5.589615000000  | 2.397574000000  | 1.751029000000  |
| H          | 4.705304000000  | 2.567609000000  | -0.224464000000 |
| H          | 6.220541000000  | 1.687068000000  | -0.175747000000 |
| C          | 6.487266000000  | 3.635751000000  | 1.660932000000  |
| H          | 4.661843000000  | 2.648916000000  | 2.281490000000  |
| H          | 6.104343000000  | 1.638406000000  | 2.345995000000  |
| C          | 6.863928000000  | 4.183999000000  | 3.038173000000  |
| H          | 7.398400000000  | 3.366580000000  | 1.112169000000  |
| H          | 5.981149000000  | 4.413645000000  | 1.072271000000  |
| H          | 5.973741000000  | 4.463051000000  | 3.615108000000  |
| H          | 7.415391000000  | 3.433342000000  | 3.616870000000  |
| H          | 7.499537000000  | 5.071827000000  | 2.952727000000  |
| C          | 2.777840000000  | 0.515032000000  | -0.573512000000 |
| C          | 2.821792000000  | 1.370559000000  | -1.843007000000 |
| H          | 2.093682000000  | 0.957692000000  | 0.163495000000  |
| H          | 2.409615000000  | -0.494863000000 | -0.782705000000 |
| C          | 1.496530000000  | 1.370510000000  | -2.619154000000 |
| H          | 3.071436000000  | 2.403181000000  | -1.576590000000 |
| H          | 3.621758000000  | 1.026944000000  | -2.501116000000 |
| C          | 1.160365000000  | 0.029076000000  | -3.276677000000 |
| H          | 0.677348000000  | 1.675389000000  | -1.952336000000 |
| H          | 1.565610000000  | 2.139482000000  | -3.398293000000 |
| H          | 0.214968000000  | 0.087325000000  | -3.826987000000 |
| H          | 1.944234000000  | -0.264313000000 | -3.982896000000 |
| H          | 1.059231000000  | -0.775817000000 | -2.539096000000 |
| C          | 3.789354000000  | -0.227751000000 | 1.973495000000  |
| C          | 4.790882000000  | -0.942893000000 | 2.888497000000  |
| H          | 2.935495000000  | -0.887896000000 | 1.789105000000  |
| H          | 3.396287000000  | 0.683480000000  | 2.437214000000  |
| C          | 4.112794000000  | -1.604469000000 | 4.095787000000  |

|   |                 |                 |                 |
|---|-----------------|-----------------|-----------------|
| H | 5.331869000000  | -1.704023000000 | 2.317250000000  |
| H | 5.544770000000  | -0.231232000000 | 3.244455000000  |
| C | 3.413398000000  | -0.620308000000 | 5.037577000000  |
| H | 3.389790000000  | -2.349175000000 | 3.734301000000  |
| H | 4.874408000000  | -2.162801000000 | 4.654411000000  |
| H | 2.999007000000  | -1.135055000000 | 5.911091000000  |
| H | 4.114965000000  | 0.141136000000  | 5.400634000000  |
| H | 2.586404000000  | -0.099731000000 | 4.541039000000  |
| P | 6.833586000000  | -1.030003000000 | -2.911668000000 |
| B | 7.219566000000  | -2.665705000000 | -0.610832000000 |
| O | 8.001483000000  | -3.399115000000 | -1.549371000000 |
| O | 7.810948000000  | -2.805118000000 | 0.684088000000  |
| C | 9.179554000000  | -3.873491000000 | -0.881758000000 |
| C | 8.725515000000  | -3.904656000000 | 0.621916000000  |
| C | 9.552003000000  | -5.233291000000 | -1.467836000000 |
| C | 10.308253000000 | -2.866581000000 | -1.137602000000 |
| C | 9.842290000000  | -3.659529000000 | 1.633495000000  |
| C | 7.962849000000  | -5.188981000000 | 0.982148000000  |
| H | 8.707481000000  | -5.925177000000 | -1.431553000000 |
| H | 9.845839000000  | -5.113664000000 | -2.516227000000 |
| H | 10.396328000000 | -5.678193000000 | -0.928036000000 |
| H | 10.073351000000 | -1.895516000000 | -0.695421000000 |
| H | 11.266995000000 | -3.214968000000 | -0.737247000000 |
| H | 10.412873000000 | -2.727362000000 | -2.218169000000 |
| H | 10.620241000000 | -4.428607000000 | 1.559256000000  |
| H | 10.298088000000 | -2.678562000000 | 1.483913000000  |
| H | 9.431338000000  | -3.689476000000 | 2.648604000000  |
| H | 8.626571000000  | -6.058944000000 | 1.040175000000  |
| H | 7.490295000000  | -5.049430000000 | 1.960256000000  |
| H | 7.175660000000  | -5.391607000000 | 0.251348000000  |
| C | 5.951409000000  | 0.510192000000  | -3.446489000000 |
| C | 6.251184000000  | 1.762107000000  | -2.880558000000 |
| C | 5.099663000000  | 0.500680000000  | -4.569034000000 |
| C | 5.677785000000  | 2.937777000000  | -3.365738000000 |
| H | 6.957233000000  | 1.826140000000  | -2.062841000000 |
| C | 4.529815000000  | 1.674726000000  | -5.059272000000 |
| H | 4.869804000000  | -0.439610000000 | -5.058111000000 |
| C | 4.802324000000  | 2.901880000000  | -4.450703000000 |
| H | 5.923214000000  | 3.885888000000  | -2.893306000000 |
| H | 3.868301000000  | 1.628736000000  | -5.920663000000 |
| H | 4.353432000000  | 3.816102000000  | -4.828810000000 |
| C | 5.564116000000  | -2.310940000000 | -3.317787000000 |
| C | 4.183125000000  | -2.121914000000 | -3.154794000000 |
| C | 6.015301000000  | -3.553345000000 | -3.784607000000 |

|            |                 |                 |                 |
|------------|-----------------|-----------------|-----------------|
| C          | 3.279164000000  | -3.145286000000 | -3.436343000000 |
| H          | 3.812961000000  | -1.167984000000 | -2.804984000000 |
| C          | 5.114620000000  | -4.581336000000 | -4.061887000000 |
| H          | 7.080817000000  | -3.720789000000 | -3.886215000000 |
| C          | 3.744267000000  | -4.382547000000 | -3.887158000000 |
| H          | 2.213449000000  | -2.974591000000 | -3.306044000000 |
| H          | 5.484563000000  | -5.540477000000 | -4.414056000000 |
| H          | 3.042454000000  | -5.182440000000 | -4.109246000000 |
| C          | 9.793461000000  | 1.308309000000  | -0.509729000000 |
| C          | 9.810582000000  | 1.465821000000  | 0.873840000000  |
| C          | 8.854745000000  | 0.789897000000  | 1.638255000000  |
| C          | 7.893206000000  | -0.005314000000 | 1.023844000000  |
| C          | 7.835138000000  | -0.151673000000 | -0.375050000000 |
| C          | 8.824685000000  | 0.507120000000  | -1.121072000000 |
| H          | 10.536284000000 | 1.807051000000  | -1.126593000000 |
| H          | 10.560338000000 | 2.090282000000  | 1.351481000000  |
| H          | 8.865559000000  | 0.873485000000  | 2.722522000000  |
| H          | 7.184882000000  | -0.552022000000 | 1.630432000000  |
| H          | 8.852111000000  | 0.386389000000  | -2.199045000000 |
| C          | 6.793047000000  | -1.065472000000 | -0.989928000000 |
| C          | 5.394851000000  | -1.036500000000 | -0.371625000000 |
| C          | 4.940295000000  | -2.348725000000 | -0.264802000000 |
| O          | 5.743093000000  | -3.312147000000 | -0.532129000000 |
| O          | 3.679216000000  | -2.635623000000 | 0.113609000000  |
| C          | 3.337997000000  | -4.032269000000 | 0.169153000000  |
| H          | 3.456636000000  | -4.484619000000 | -0.817432000000 |
| H          | 3.971216000000  | -4.552447000000 | 0.891542000000  |
| H          | 2.294000000000  | -4.058891000000 | 0.483700000000  |
| <b>S9R</b> |                 |                 |                 |
| P          | -0.126184000000 | -0.072619000000 | -1.425132000000 |
| C          | -1.147492000000 | -0.721393000000 | -2.854025000000 |
| C          | -1.833479000000 | -2.090618000000 | -2.766147000000 |
| H          | -0.454852000000 | -0.733820000000 | -3.705141000000 |
| H          | -1.881761000000 | 0.058072000000  | -3.084412000000 |
| C          | -2.827639000000 | -2.298565000000 | -3.913400000000 |
| H          | -1.076432000000 | -2.884820000000 | -2.798047000000 |
| H          | -2.365689000000 | -2.205237000000 | -1.821399000000 |
| C          | -3.548174000000 | -3.644582000000 | -3.819022000000 |
| H          | -3.565893000000 | -1.486470000000 | -3.887767000000 |
| H          | -2.306750000000 | -2.216185000000 | -4.877847000000 |
| H          | -4.258502000000 | -3.779278000000 | -4.642296000000 |
| H          | -2.836550000000 | -4.478727000000 | -3.851055000000 |
| H          | -4.104046000000 | -3.716613000000 | -2.876904000000 |
| C          | 0.551351000000  | -1.670276000000 | -0.791347000000 |

|   |                 |                 |                 |
|---|-----------------|-----------------|-----------------|
| C | 1.489126000000  | -1.740870000000 | 0.413815000000  |
| H | 1.024175000000  | -2.132220000000 | -1.667906000000 |
| H | -0.345203000000 | -2.266007000000 | -0.590060000000 |
| C | 1.924273000000  | -3.184751000000 | 0.685629000000  |
| H | 2.363570000000  | -1.106526000000 | 0.252906000000  |
| H | 0.978165000000  | -1.340849000000 | 1.294193000000  |
| C | 2.851975000000  | -3.287056000000 | 1.898583000000  |
| H | 1.036437000000  | -3.813212000000 | 0.845925000000  |
| H | 2.429662000000  | -3.591526000000 | -0.202374000000 |
| H | 3.155749000000  | -4.322740000000 | 2.087069000000  |
| H | 3.760822000000  | -2.692283000000 | 1.747597000000  |
| H | 2.358047000000  | -2.910386000000 | 2.801969000000  |
| C | 1.064120000000  | 0.923823000000  | -2.436015000000 |
| C | 2.333237000000  | 0.137194000000  | -2.782286000000 |
| H | 1.327966000000  | 1.805232000000  | -1.859923000000 |
| H | 0.534886000000  | 1.233708000000  | -3.342198000000 |
| C | 3.303257000000  | 0.974358000000  | -3.623188000000 |
| H | 2.829316000000  | -0.168363000000 | -1.854505000000 |
| H | 2.083767000000  | -0.782139000000 | -3.331385000000 |
| C | 4.588113000000  | 0.216715000000  | -3.965117000000 |
| H | 2.802458000000  | 1.293457000000  | -4.547588000000 |
| H | 3.548979000000  | 1.891892000000  | -3.072311000000 |
| H | 5.271132000000  | 0.835319000000  | -4.557418000000 |
| H | 5.117302000000  | -0.089495000000 | -3.054836000000 |
| H | 4.371347000000  | -0.689658000000 | -4.543606000000 |
| P | -1.602067000000 | 2.491770000000  | -1.221314000000 |
| B | -1.605529000000 | 0.973522000000  | 2.437881000000  |
| O | -1.118686000000 | 0.937880000000  | 3.739036000000  |
| O | -3.000200000000 | 1.074705000000  | 2.446733000000  |
| C | -2.191601000000 | 1.311514000000  | 4.624861000000  |
| C | -3.463004000000 | 0.906418000000  | 3.802245000000  |
| C | -2.013940000000 | 0.571022000000  | 5.946157000000  |
| C | -2.083623000000 | 2.824898000000  | 4.851712000000  |
| C | -4.685952000000 | 1.794218000000  | 4.009601000000  |
| C | -3.845253000000 | -0.568179000000 | 3.968067000000  |
| H | -1.092089000000 | 0.906021000000  | 6.431726000000  |
| H | -2.850706000000 | 0.773382000000  | 6.624693000000  |
| H | -1.940120000000 | -0.507538000000 | 5.791301000000  |
| H | -2.814420000000 | 3.183246000000  | 5.584512000000  |
| H | -1.078159000000 | 3.051104000000  | 5.218091000000  |
| H | -2.230932000000 | 3.372594000000  | 3.916260000000  |
| H | -4.473772000000 | 2.833143000000  | 3.746924000000  |
| H | -5.505537000000 | 1.443581000000  | 3.373451000000  |
| H | -5.024707000000 | 1.758200000000  | 5.051163000000  |

|   |                 |                 |                 |
|---|-----------------|-----------------|-----------------|
| H | -2.971936000000 | -1.212719000000 | 3.831278000000  |
| H | -4.276800000000 | -0.767722000000 | 4.954587000000  |
| H | -4.580753000000 | -0.830460000000 | 3.202140000000  |
| C | -3.294918000000 | 3.159331000000  | -0.895068000000 |
| C | -4.080938000000 | 2.928343000000  | 0.242639000000  |
| C | -3.800219000000 | 3.992016000000  | -1.907300000000 |
| C | -5.331226000000 | 3.533783000000  | 0.367882000000  |
| H | -3.733426000000 | 2.261795000000  | 1.021064000000  |
| C | -5.047464000000 | 4.603296000000  | -1.774872000000 |
| H | -3.208592000000 | 4.162517000000  | -2.803290000000 |
| C | -5.817228000000 | 4.375513000000  | -0.633899000000 |
| H | -5.928179000000 | 3.341065000000  | 1.255843000000  |
| H | -5.418286000000 | 5.250835000000  | -2.564979000000 |
| H | -6.791820000000 | 4.845096000000  | -0.530291000000 |
| C | -0.590931000000 | 3.632420000000  | -0.194764000000 |
| C | 0.577659000000  | 4.169749000000  | -0.748466000000 |
| C | -0.928988000000 | 3.970366000000  | 1.124118000000  |
| C | 1.408363000000  | 5.002421000000  | 0.002528000000  |
| H | 0.839852000000  | 3.931497000000  | -1.775224000000 |
| C | -0.099585000000 | 4.797305000000  | 1.878605000000  |
| H | -1.845981000000 | 3.591421000000  | 1.557669000000  |
| C | 1.074570000000  | 5.308683000000  | 1.322296000000  |
| H | 2.312407000000  | 5.409581000000  | -0.442119000000 |
| H | -0.367826000000 | 5.036437000000  | 2.903736000000  |
| H | 1.721900000000  | 5.951407000000  | 1.913018000000  |
| C | -4.753048000000 | -0.846801000000 | -1.143401000000 |
| C | -4.758378000000 | -1.964636000000 | -0.311223000000 |
| C | -3.680570000000 | -2.172736000000 | 0.552471000000  |
| C | -2.622025000000 | -1.269391000000 | 0.581919000000  |
| C | -2.602099000000 | -0.133403000000 | -0.246018000000 |
| C | -3.685536000000 | 0.052140000000  | -1.114491000000 |
| H | -5.581748000000 | -0.665961000000 | -1.822064000000 |
| H | -5.590674000000 | -2.662558000000 | -0.332297000000 |
| H | -3.664507000000 | -3.038494000000 | 1.208868000000  |
| H | -1.792651000000 | -1.429306000000 | 1.261737000000  |
| H | -3.717415000000 | 0.906042000000  | -1.777270000000 |
| C | -1.369055000000 | 0.777981000000  | -0.206912000000 |
| C | -0.778431000000 | 0.915925000000  | 1.174045000000  |
| C | 0.605920000000  | 1.161022000000  | 1.190472000000  |
| O | 1.337812000000  | 1.076092000000  | 0.167263000000  |
| O | 1.176592000000  | 1.498600000000  | 2.376882000000  |
| C | 2.564056000000  | 1.815190000000  | 2.321749000000  |
| H | 2.839219000000  | 2.084150000000  | 3.343669000000  |
| H | 3.159541000000  | 0.959248000000  | 1.987224000000  |

|            |                 |                 |                 |
|------------|-----------------|-----------------|-----------------|
| H          | 2.746505000000  | 2.657687000000  | 1.647784000000  |
| <b>S9S</b> |                 |                 |                 |
| P          | 7.038025000000  | -1.866052000000 | 1.254715000000  |
| C          | 6.162136000000  | -3.472898000000 | 1.094595000000  |
| C          | 6.538830000000  | -4.560665000000 | 2.108166000000  |
| H          | 6.308387000000  | -3.822835000000 | 0.071170000000  |
| H          | 5.103687000000  | -3.229870000000 | 1.178107000000  |
| C          | 5.568463000000  | -5.751703000000 | 2.035803000000  |
| H          | 7.554944000000  | -4.919987000000 | 1.909896000000  |
| H          | 6.541106000000  | -4.164125000000 | 3.133017000000  |
| C          | 4.133759000000  | -5.417971000000 | 2.457572000000  |
| H          | 5.567476000000  | -6.148108000000 | 1.011954000000  |
| H          | 5.957037000000  | -6.551945000000 | 2.678727000000  |
| H          | 3.664697000000  | -4.692791000000 | 1.784220000000  |
| H          | 3.508971000000  | -6.317537000000 | 2.454339000000  |
| H          | 4.107790000000  | -4.998199000000 | 3.471124000000  |
| C          | 6.371807000000  | -0.998111000000 | 2.737552000000  |
| C          | 5.011581000000  | -1.493627000000 | 3.247304000000  |
| H          | 6.272358000000  | 0.055461000000  | 2.467166000000  |
| H          | 7.131550000000  | -1.082820000000 | 3.524134000000  |
| C          | 4.557551000000  | -0.696924000000 | 4.473242000000  |
| H          | 4.274823000000  | -1.391208000000 | 2.444878000000  |
| H          | 5.054082000000  | -2.556951000000 | 3.509766000000  |
| C          | 3.158873000000  | -1.101374000000 | 4.943227000000  |
| H          | 5.279829000000  | -0.838550000000 | 5.289988000000  |
| H          | 4.572510000000  | 0.370335000000  | 4.226500000000  |
| H          | 2.416546000000  | -0.928653000000 | 4.155198000000  |
| H          | 3.120368000000  | -2.165888000000 | 5.205191000000  |
| H          | 2.851556000000  | -0.528500000000 | 5.825098000000  |
| C          | 8.765212000000  | -2.393656000000 | 1.698703000000  |
| C          | 9.804325000000  | -1.348102000000 | 2.117413000000  |
| H          | 9.133399000000  | -2.988511000000 | 0.859184000000  |
| H          | 8.603926000000  | -3.086242000000 | 2.534391000000  |
| C          | 10.987844000000 | -1.978480000000 | 2.870438000000  |
| H          | 10.161020000000 | -0.808336000000 | 1.234849000000  |
| H          | 9.346169000000  | -0.607481000000 | 2.784808000000  |
| C          | 11.784126000000 | -3.006316000000 | 2.064347000000  |
| H          | 11.659075000000 | -1.170384000000 | 3.188761000000  |
| H          | 10.611914000000 | -2.444895000000 | 3.792515000000  |
| H          | 11.163972000000 | -3.860924000000 | 1.770905000000  |
| H          | 12.181888000000 | -2.560465000000 | 1.148107000000  |
| H          | 12.624033000000 | -3.394336000000 | 2.651035000000  |
| P          | 7.478367000000  | -1.946648000000 | -1.748266000000 |
| B          | 4.326326000000  | 0.341839000000  | 0.211770000000  |



|   |                 |                 |                 |
|---|-----------------|-----------------|-----------------|
| O | 4.706141000000  | 1.132527000000  | 1.303227000000  |
| O | 3.142864000000  | 0.812345000000  | -0.336636000000 |
| C | 3.839411000000  | 2.291930000000  | 1.338244000000  |
| C | 2.571943000000  | 1.763187000000  | 0.580871000000  |
| C | 3.601016000000  | 2.691832000000  | 2.789591000000  |
| C | 4.555891000000  | 3.422086000000  | 0.595025000000  |
| C | 1.812036000000  | 2.818345000000  | -0.214933000000 |
| C | 1.609700000000  | 0.988163000000  | 1.489652000000  |
| H | 3.179879000000  | 1.870888000000  | 3.372952000000  |
| H | 4.548063000000  | 2.991036000000  | 3.251222000000  |
| H | 2.913650000000  | 3.543586000000  | 2.845911000000  |
| H | 4.700870000000  | 3.167909000000  | -0.456800000000 |
| H | 3.997621000000  | 4.362187000000  | 0.658740000000  |
| H | 5.545181000000  | 3.568832000000  | 1.037595000000  |
| H | 1.418540000000  | 3.599715000000  | 0.445632000000  |
| H | 2.451219000000  | 3.284193000000  | -0.967798000000 |
| H | 0.967477000000  | 2.350557000000  | -0.730716000000 |
| H | 1.073315000000  | 1.649086000000  | 2.178768000000  |
| H | 0.880958000000  | 0.466472000000  | 0.862899000000  |
| H | 2.148365000000  | 0.234581000000  | 2.072018000000  |
| C | 9.285006000000  | -1.508721000000 | -1.585847000000 |
| C | 9.892689000000  | -0.239211000000 | -1.549053000000 |
| C | 10.127749000000 | -2.633839000000 | -1.559109000000 |
| C | 11.279588000000 | -0.110534000000 | -1.466526000000 |
| H | 9.293129000000  | 0.657434000000  | -1.609953000000 |
| C | 11.515919000000 | -2.508993000000 | -1.492555000000 |
| H | 9.679334000000  | -3.623599000000 | -1.604492000000 |
| C | 12.096666000000 | -1.242157000000 | -1.438018000000 |
| H | 11.721327000000 | 0.881935000000  | -1.436637000000 |
| H | 12.139983000000 | -3.398367000000 | -1.482363000000 |
| H | 13.176799000000 | -1.136374000000 | -1.382945000000 |
| C | 7.006971000000  | -1.047461000000 | -3.293127000000 |
| C | 5.681596000000  | -1.147501000000 | -3.755704000000 |
| C | 7.923885000000  | -0.312893000000 | -4.062942000000 |
| C | 5.281250000000  | -0.479932000000 | -4.911835000000 |
| H | 4.979187000000  | -1.763759000000 | -3.211341000000 |
| C | 7.521396000000  | 0.340663000000  | -5.227364000000 |
| H | 8.960619000000  | -0.243812000000 | -3.760839000000 |
| C | 6.194028000000  | 0.275763000000  | -5.648833000000 |
| H | 4.247967000000  | -0.557780000000 | -5.239686000000 |
| H | 8.250943000000  | 0.906008000000  | -5.801588000000 |
| H | 5.877677000000  | 0.795361000000  | -6.549382000000 |
| C | 7.296451000000  | 2.667952000000  | -1.533540000000 |
| C | 8.180078000000  | 3.181828000000  | -0.580171000000 |

|   |                |                 |                 |
|---|----------------|-----------------|-----------------|
| C | 8.517873000000 | 2.395816000000  | 0.518620000000  |
| C | 8.010119000000 | 1.100665000000  | 0.639014000000  |
| C | 7.153804000000 | 0.559124000000  | -0.322249000000 |
| C | 6.772833000000 | 1.386492000000  | -1.394432000000 |
| H | 7.004484000000 | 3.269747000000  | -2.389603000000 |
| H | 8.583688000000 | 4.184802000000  | -0.686000000000 |
| H | 9.184138000000 | 2.780864000000  | 1.285863000000  |
| H | 8.303861000000 | 0.520224000000  | 1.500583000000  |
| H | 6.068877000000 | 1.012167000000  | -2.125197000000 |
| C | 6.617254000000 | -0.864334000000 | -0.317801000000 |
| C | 5.102262000000 | -0.860589000000 | -0.317979000000 |
| C | 4.385133000000 | -1.982509000000 | -0.811007000000 |
| O | 4.805580000000 | -2.928115000000 | -1.501679000000 |
| O | 3.066210000000 | -2.007432000000 | -0.387142000000 |
| C | 2.251432000000 | -3.000226000000 | -0.999613000000 |
| H | 2.644505000000 | -4.006198000000 | -0.821496000000 |
| H | 2.179519000000 | -2.847146000000 | -2.082179000000 |
| H | 1.264174000000 | -2.892730000000 | -0.544512000000 |

**S10R**

|   |                 |                 |                 |
|---|-----------------|-----------------|-----------------|
| P | -2.132847000000 | -1.062163000000 | -0.915484000000 |
| C | -3.863420000000 | -0.393341000000 | -1.069256000000 |
| C | -3.838359000000 | 1.086438000000  | -1.483122000000 |
| H | -4.361323000000 | -0.502459000000 | -0.101878000000 |
| H | -4.425439000000 | -0.977583000000 | -1.803192000000 |
| C | -5.224999000000 | 1.732784000000  | -1.416307000000 |
| H | -3.142456000000 | 1.643230000000  | -0.844719000000 |
| H | -3.440923000000 | 1.175382000000  | -2.503360000000 |
| C | -5.204993000000 | 3.208346000000  | -1.821497000000 |
| H | -5.921001000000 | 1.178674000000  | -2.061580000000 |
| H | -5.613601000000 | 1.635412000000  | -0.393000000000 |
| H | -4.850368000000 | 3.329383000000  | -2.852406000000 |
| H | -6.202440000000 | 3.657377000000  | -1.756150000000 |
| H | -4.533623000000 | 3.783312000000  | -1.172472000000 |
| C | -2.099552000000 | -2.755310000000 | -0.145911000000 |
| C | -0.674899000000 | -3.129905000000 | 0.285870000000  |
| H | -2.492479000000 | -3.493348000000 | -0.848158000000 |
| H | -2.765066000000 | -2.739847000000 | 0.720471000000  |
| C | -0.616255000000 | -4.449104000000 | 1.061540000000  |
| H | -0.023366000000 | -3.192449000000 | -0.596468000000 |
| H | -0.255930000000 | -2.329655000000 | 0.904629000000  |
| C | 0.800192000000  | -4.785817000000 | 1.532871000000  |
| H | -1.285566000000 | -4.385196000000 | 1.931018000000  |
| H | -1.006170000000 | -5.264810000000 | 0.437017000000  |
| H | 0.826498000000  | -5.724107000000 | 2.098226000000  |

|   |                 |                 |                 |
|---|-----------------|-----------------|-----------------|
| H | 1.485759000000  | -4.885834000000 | 0.682984000000  |
| H | 1.191908000000  | -3.991010000000 | 2.179438000000  |
| C | -2.007968000000 | -1.646940000000 | -2.748605000000 |
| C | -2.925160000000 | -2.786101000000 | -3.212243000000 |
| H | -0.965049000000 | -1.914501000000 | -2.949030000000 |
| H | -2.202556000000 | -0.751419000000 | -3.353444000000 |
| C | -3.120292000000 | -2.805337000000 | -4.733991000000 |
| H | -2.505864000000 | -3.753419000000 | -2.904302000000 |
| H | -3.914333000000 | -2.727607000000 | -2.736046000000 |
| C | -3.984432000000 | -3.974257000000 | -5.212510000000 |
| H | -3.575310000000 | -1.855392000000 | -5.047464000000 |
| H | -2.136872000000 | -2.846494000000 | -5.222296000000 |
| H | -4.114628000000 | -3.960528000000 | -6.300546000000 |
| H | -3.531392000000 | -4.936123000000 | -4.942430000000 |
| H | -4.981455000000 | -3.940060000000 | -4.756172000000 |
| P | -0.484887000000 | 1.777665000000  | 2.300499000000  |
| B | 1.370934000000  | 0.376538000000  | -0.496235000000 |
| O | 2.338815000000  | 0.863937000000  | -1.327818000000 |
| O | 1.779837000000  | -0.692043000000 | 0.256125000000  |
| C | 3.438695000000  | -0.093135000000 | -1.319042000000 |
| C | 3.205742000000  | -0.879970000000 | 0.026552000000  |
| C | 3.253693000000  | -0.957387000000 | -2.568803000000 |
| C | 4.746113000000  | 0.685990000000  | -1.387640000000 |
| C | 3.932191000000  | -0.268728000000 | 1.222984000000  |
| C | 3.475474000000  | -2.378245000000 | -0.050087000000 |
| H | 4.061383000000  | -1.687830000000 | -2.679246000000 |
| H | 2.298137000000  | -1.489871000000 | -2.538453000000 |
| H | 3.249642000000  | -0.308945000000 | -3.449776000000 |
| H | 4.807156000000  | 1.425985000000  | -0.587357000000 |
| H | 5.605479000000  | 0.010513000000  | -1.313253000000 |
| H | 4.808501000000  | 1.212045000000  | -2.345304000000 |
| H | 5.012862000000  | -0.432068000000 | 1.157151000000  |
| H | 3.742448000000  | 0.801642000000  | 1.300070000000  |
| H | 3.567477000000  | -0.739252000000 | 2.140793000000  |
| H | 4.527282000000  | -2.571719000000 | -0.288000000000 |
| H | 3.255434000000  | -2.837475000000 | 0.918017000000  |
| H | 2.849460000000  | -2.862921000000 | -0.801945000000 |
| C | -0.312921000000 | 0.483294000000  | 3.608957000000  |
| C | 0.448265000000  | -0.681028000000 | 3.412825000000  |
| C | -0.989524000000 | 0.659281000000  | 4.819001000000  |
| C | 0.515699000000  | -1.651564000000 | 4.409058000000  |
| H | 0.969914000000  | -0.825606000000 | 2.472332000000  |
| C | -0.924439000000 | -0.316355000000 | 5.816641000000  |
| H | -1.595506000000 | 1.548396000000  | 4.967397000000  |

|            |                 |                 |                 |
|------------|-----------------|-----------------|-----------------|
| C          | -0.174834000000 | -1.473355000000 | 5.612433000000  |
| H          | 1.102964000000  | -2.552299000000 | 4.247528000000  |
| H          | -1.468700000000 | -0.175587000000 | 6.746362000000  |
| H          | -0.127636000000 | -2.235685000000 | 6.385519000000  |
| C          | 1.281853000000  | 2.315582000000  | 2.124828000000  |
| C          | 1.702139000000  | 3.065896000000  | 1.013531000000  |
| C          | 2.176846000000  | 2.167305000000  | 3.199399000000  |
| C          | 2.989412000000  | 3.601006000000  | 0.956953000000  |
| H          | 1.018176000000  | 3.224933000000  | 0.188828000000  |
| C          | 3.451767000000  | 2.729224000000  | 3.153185000000  |
| H          | 1.876706000000  | 1.606968000000  | 4.077497000000  |
| C          | 3.870643000000  | 3.439317000000  | 2.026405000000  |
| H          | 3.296843000000  | 4.155113000000  | 0.074184000000  |
| H          | 4.124386000000  | 2.599232000000  | 3.996965000000  |
| H          | 4.868437000000  | 3.867605000000  | 1.986657000000  |
| C          | -3.649314000000 | -1.541550000000 | 3.908961000000  |
| C          | -4.591923000000 | -0.540370000000 | 4.145430000000  |
| C          | -4.642366000000 | 0.566912000000  | 3.297458000000  |
| C          | -3.760785000000 | 0.666997000000  | 2.222302000000  |
| C          | -2.813450000000 | -0.339351000000 | 1.965293000000  |
| C          | -2.773723000000 | -1.443774000000 | 2.830128000000  |
| H          | -3.581105000000 | -2.396061000000 | 4.576193000000  |
| H          | -5.274451000000 | -0.617645000000 | 4.987145000000  |
| H          | -5.364032000000 | 1.359538000000  | 3.476088000000  |
| H          | -3.788067000000 | 1.539296000000  | 1.576297000000  |
| H          | -2.011038000000 | -2.201185000000 | 2.693242000000  |
| C          | -1.873825000000 | -0.177939000000 | 0.828949000000  |
| C          | -0.855396000000 | 0.688289000000  | 0.853007000000  |
| C          | -0.163389000000 | 0.810387000000  | -0.490027000000 |
| O          | -0.723464000000 | -0.162471000000 | -1.362608000000 |
| O          | -0.488736000000 | 2.115205000000  | -0.961231000000 |
| C          | -0.133239000000 | 2.393505000000  | -2.314629000000 |
| H          | -0.583499000000 | 1.660296000000  | -2.991225000000 |
| H          | -0.538958000000 | 3.385072000000  | -2.529185000000 |
| H          | 0.952437000000  | 2.395882000000  | -2.453457000000 |
| <b>S11</b> |                 |                 |                 |
| P          | -0.695953000000 | -0.625660000000 | 0.720909000000  |
| B          | 1.025157000000  | 1.046758000000  | -0.765586000000 |
| O          | 0.333592000000  | 1.847984000000  | -1.641714000000 |
| O          | 1.917066000000  | 1.733763000000  | 0.012208000000  |
| C          | 0.654316000000  | 3.229423000000  | -1.319250000000 |
| C          | 2.005488000000  | 3.084784000000  | -0.523231000000 |
| C          | 0.754825000000  | 4.015323000000  | -2.621434000000 |
| C          | -0.498860000000 | 3.764045000000  | -0.465694000000 |

|   |                 |                 |                 |
|---|-----------------|-----------------|-----------------|
| C | 2.170928000000  | 4.053550000000  | 0.641516000000  |
| C | 3.243537000000  | 3.108819000000  | -1.423487000000 |
| H | 1.061762000000  | 5.049413000000  | -2.428604000000 |
| H | 1.466532000000  | 3.558845000000  | -3.311568000000 |
| H | -0.224063000000 | 4.037074000000  | -3.110347000000 |
| H | -0.590612000000 | 3.215479000000  | 0.473263000000  |
| H | -0.367320000000 | 4.826925000000  | -0.238637000000 |
| H | -1.434309000000 | 3.644030000000  | -1.020720000000 |
| H | 3.123400000000  | 3.860835000000  | 1.145025000000  |
| H | 2.177457000000  | 5.089752000000  | 0.285316000000  |
| H | 1.369883000000  | 3.937967000000  | 1.374069000000  |
| H | 4.113877000000  | 2.805023000000  | -0.834658000000 |
| H | 3.135783000000  | 2.407302000000  | -2.256209000000 |
| H | 3.429027000000  | 4.108964000000  | -1.828030000000 |
| C | -1.089238000000 | 0.794686000000  | 1.761000000000  |
| C | -0.071473000000 | 1.344205000000  | 2.557730000000  |
| C | -2.368697000000 | 1.372386000000  | 1.764571000000  |
| C | -0.340301000000 | 2.453982000000  | 3.355191000000  |
| H | 0.919793000000  | 0.906449000000  | 2.515916000000  |
| C | -2.625363000000 | 2.485723000000  | 2.562195000000  |
| H | -3.154000000000 | 0.955099000000  | 1.143479000000  |
| C | -1.613730000000 | 3.029575000000  | 3.356759000000  |
| H | 0.449591000000  | 2.876814000000  | 3.969482000000  |
| H | -3.615811000000 | 2.931687000000  | 2.559761000000  |
| H | -1.815881000000 | 3.901595000000  | 3.972126000000  |
| C | -2.191964000000 | -1.021815000000 | -0.267067000000 |
| C | -3.051665000000 | -2.042117000000 | 0.154259000000  |
| C | -2.470879000000 | -0.312466000000 | -1.445720000000 |
| C | -4.183661000000 | -2.357624000000 | -0.597790000000 |
| H | -2.828109000000 | -2.596119000000 | 1.061756000000  |
| C | -3.602264000000 | -0.634113000000 | -2.193961000000 |
| H | -1.801148000000 | 0.477264000000  | -1.774295000000 |
| C | -4.457524000000 | -1.655373000000 | -1.772179000000 |
| H | -4.846372000000 | -3.153684000000 | -0.270490000000 |
| H | -3.814432000000 | -0.089363000000 | -3.109687000000 |
| H | -5.335984000000 | -1.904773000000 | -2.360737000000 |
| C | 3.468811000000  | -3.900501000000 | 0.468389000000  |
| C | 3.103244000000  | -4.733589000000 | 1.526832000000  |
| C | 1.997029000000  | -4.390965000000 | 2.312264000000  |
| C | 1.271715000000  | -3.236693000000 | 2.045223000000  |
| C | 1.627696000000  | -2.388003000000 | 0.978140000000  |
| C | 2.741656000000  | -2.745299000000 | 0.192378000000  |
| H | 4.326316000000  | -4.152282000000 | -0.150713000000 |
| H | 3.668264000000  | -5.637029000000 | 1.737362000000  |

|            |                 |                 |                 |
|------------|-----------------|-----------------|-----------------|
| H          | 1.697438000000  | -5.033053000000 | 3.136926000000  |
| H          | 0.405177000000  | -2.981978000000 | 2.650891000000  |
| H          | 3.041025000000  | -2.096425000000 | -0.626368000000 |
| C          | 0.934877000000  | -1.149600000000 | 0.714223000000  |
| C          | 0.706270000000  | -0.476229000000 | -0.592041000000 |
| C          | 0.620084000000  | -1.263840000000 | -1.874080000000 |
| O          | 1.027442000000  | -0.866546000000 | -2.948635000000 |
| O          | 0.057602000000  | -2.476421000000 | -1.694134000000 |
| C          | -0.057261000000 | -3.284668000000 | -2.869349000000 |
| H          | 0.929778000000  | -3.481858000000 | -3.295638000000 |
| H          | -0.526701000000 | -4.212131000000 | -2.541266000000 |
| H          | -0.676715000000 | -2.782352000000 | -3.617652000000 |
| <b>S12</b> |                 |                 |                 |
| P          | 7.452281000000  | -2.104031000000 | 2.415544000000  |
| C          | 7.585641000000  | -3.895775000000 | 2.067405000000  |
| C          | 6.267138000000  | -4.686002000000 | 1.984652000000  |
| H          | 8.276146000000  | -4.333590000000 | 2.796476000000  |
| H          | 8.067507000000  | -3.902400000000 | 1.084680000000  |
| C          | 5.621067000000  | -5.036372000000 | 3.332565000000  |
| H          | 5.562491000000  | -4.146887000000 | 1.344507000000  |
| H          | 6.486397000000  | -5.617376000000 | 1.448110000000  |
| C          | 6.403485000000  | -6.072157000000 | 4.145265000000  |
| H          | 5.480995000000  | -4.131106000000 | 3.938277000000  |
| H          | 4.613551000000  | -5.423607000000 | 3.138501000000  |
| H          | 6.497945000000  | -7.012287000000 | 3.589557000000  |
| H          | 7.417133000000  | -5.730922000000 | 4.386031000000  |
| H          | 5.900158000000  | -6.292186000000 | 5.093014000000  |
| C          | 5.746627000000  | -1.478336000000 | 2.394083000000  |
| C          | 5.525937000000  | -0.090259000000 | 3.016721000000  |
| H          | 5.109343000000  | -2.234156000000 | 2.865346000000  |
| H          | 5.494567000000  | -1.442618000000 | 1.325529000000  |
| C          | 4.075980000000  | 0.367889000000  | 2.815875000000  |
| H          | 5.762057000000  | -0.099984000000 | 4.087514000000  |
| H          | 6.193854000000  | 0.629890000000  | 2.539250000000  |
| C          | 3.895179000000  | 1.846530000000  | 3.164691000000  |
| H          | 3.792969000000  | 0.207294000000  | 1.768767000000  |
| H          | 3.403133000000  | -0.257072000000 | 3.420278000000  |
| H          | 4.517608000000  | 2.462487000000  | 2.506825000000  |
| H          | 2.852295000000  | 2.158483000000  | 3.041746000000  |
| H          | 4.186243000000  | 2.050564000000  | 4.202838000000  |
| C          | 8.312933000000  | -1.724125000000 | 3.981966000000  |
| C          | 7.908597000000  | -2.536041000000 | 5.223438000000  |
| H          | 8.209116000000  | -0.645220000000 | 4.144806000000  |
| H          | 9.369010000000  | -1.898614000000 | 3.741800000000  |

|   |                 |                 |                 |
|---|-----------------|-----------------|-----------------|
| C | 6.557563000000  | -2.168430000000 | 5.845546000000  |
| H | 7.919423000000  | -3.606680000000 | 4.984361000000  |
| H | 8.691242000000  | -2.394183000000 | 5.979312000000  |
| C | 6.229953000000  | -3.039840000000 | 7.059530000000  |
| H | 6.570326000000  | -1.110085000000 | 6.136820000000  |
| H | 5.756910000000  | -2.269356000000 | 5.103526000000  |
| H | 6.169972000000  | -4.097944000000 | 6.778079000000  |
| H | 7.000440000000  | -2.944702000000 | 7.833591000000  |
| H | 5.270648000000  | -2.756210000000 | 7.504222000000  |
| P | 6.705212000000  | -2.474870000000 | -1.105989000000 |
| B | 6.881813000000  | 1.674538000000  | -0.407331000000 |
| O | 7.554494000000  | 2.272065000000  | -1.442985000000 |
| O | 6.183537000000  | 2.569323000000  | 0.369492000000  |
| C | 7.094650000000  | 3.648195000000  | -1.530029000000 |
| C | 6.516630000000  | 3.906994000000  | -0.085868000000 |
| C | 8.282720000000  | 4.525595000000  | -1.908039000000 |
| C | 6.034865000000  | 3.683790000000  | -2.634711000000 |
| C | 5.248199000000  | 4.751770000000  | -0.050924000000 |
| C | 7.552123000000  | 4.451582000000  | 0.902223000000  |
| H | 9.110369000000  | 4.407809000000  | -1.205108000000 |
| H | 8.639820000000  | 4.244772000000  | -2.903522000000 |
| H | 7.993189000000  | 5.582113000000  | -1.935633000000 |
| H | 5.190846000000  | 3.029659000000  | -2.402680000000 |
| H | 5.664430000000  | 4.700685000000  | -2.802596000000 |
| H | 6.487457000000  | 3.323053000000  | -3.563158000000 |
| H | 5.437056000000  | 5.756048000000  | -0.446562000000 |
| H | 4.449590000000  | 4.288621000000  | -0.633913000000 |
| H | 4.902265000000  | 4.853144000000  | 0.982904000000  |
| H | 7.834902000000  | 5.482781000000  | 0.667068000000  |
| H | 7.122695000000  | 4.430148000000  | 1.908420000000  |
| H | 8.451497000000  | 3.829808000000  | 0.910789000000  |
| C | 7.809746000000  | -2.558240000000 | -2.592778000000 |
| C | 8.434424000000  | -3.765574000000 | -2.945817000000 |
| C | 8.159278000000  | -1.394893000000 | -3.293506000000 |
| C | 9.340719000000  | -3.821545000000 | -4.004172000000 |
| H | 8.214073000000  | -4.669244000000 | -2.380895000000 |
| C | 9.075772000000  | -1.447369000000 | -4.344041000000 |
| H | 7.712793000000  | -0.448826000000 | -2.999831000000 |
| C | 9.662380000000  | -2.660249000000 | -4.710052000000 |
| H | 9.804492000000  | -4.768092000000 | -4.271224000000 |
| H | 9.331346000000  | -0.536723000000 | -4.880256000000 |
| H | 10.374414000000 | -2.699247000000 | -5.530220000000 |
| C | 5.176946000000  | -3.369705000000 | -1.627210000000 |
| C | 4.005395000000  | -3.167832000000 | -0.875556000000 |

|   |                 |                 |                 |
|---|-----------------|-----------------|-----------------|
| C | 5.141756000000  | -4.322996000000 | -2.654177000000 |
| C | 2.848161000000  | -3.897744000000 | -1.134154000000 |
| H | 3.992549000000  | -2.398770000000 | -0.109037000000 |
| C | 3.982064000000  | -5.055205000000 | -2.913822000000 |
| H | 6.018898000000  | -4.481808000000 | -3.272400000000 |
| C | 2.830614000000  | -4.851779000000 | -2.153838000000 |
| H | 1.951837000000  | -3.709281000000 | -0.548298000000 |
| H | 3.978548000000  | -5.781981000000 | -3.722592000000 |
| H | 1.927382000000  | -5.419397000000 | -2.360344000000 |
| C | 3.694724000000  | -0.103718000000 | -3.732376000000 |
| C | 2.864650000000  | 0.867632000000  | -3.163417000000 |
| C | 3.126831000000  | 1.282948000000  | -1.857509000000 |
| C | 4.192845000000  | 0.740201000000  | -1.140978000000 |
| C | 5.069030000000  | -0.217920000000 | -1.705409000000 |
| C | 4.768750000000  | -0.631314000000 | -3.025017000000 |
| H | 3.508941000000  | -0.447992000000 | -4.747249000000 |
| H | 2.027250000000  | 1.277913000000  | -3.720959000000 |
| H | 2.482834000000  | 2.017636000000  | -1.377588000000 |
| H | 4.351552000000  | 1.058878000000  | -0.118216000000 |
| H | 5.400712000000  | -1.370407000000 | -3.503618000000 |
| C | 6.190151000000  | -0.768180000000 | -0.928599000000 |
| C | 6.981964000000  | 0.131433000000  | -0.131940000000 |
| C | 7.925031000000  | -0.091525000000 | 0.820437000000  |
| O | 8.326384000000  | -1.405481000000 | 1.264237000000  |
| O | 8.659448000000  | 0.885386000000  | 1.449990000000  |
| C | 9.959162000000  | 1.097089000000  | 0.870369000000  |
| H | 10.563797000000 | 0.184370000000  | 0.930381000000  |
| H | 10.435316000000 | 1.891959000000  | 1.451333000000  |
| H | 9.855292000000  | 1.403037000000  | -0.176132000000 |

**TS<sub>1/2</sub>**

|   |              |              |              |
|---|--------------|--------------|--------------|
| P | 0.422566000  | -0.585064000 | -0.293557000 |
| C | 0.397389000  | -2.167200000 | -1.306315000 |
| C | -0.730936000 | -3.208665000 | -1.131928000 |
| H | 1.365996000  | -2.655685000 | -1.136575000 |
| H | 0.424841000  | -1.811913000 | -2.344213000 |
| C | -0.491848000 | -4.238223000 | -0.022425000 |
| H | -1.692202000 | -2.714850000 | -0.966005000 |
| H | -0.835350000 | -3.752521000 | -2.081825000 |
| C | -1.619853000 | -5.269227000 | 0.060830000  |
| H | 0.465043000  | -4.747172000 | -0.203199000 |
| H | -0.394342000 | -3.737159000 | 0.946378000  |
| H | -1.430623000 | -6.006588000 | 0.848416000  |
| H | -2.578914000 | -4.784418000 | 0.280666000  |
| H | -1.732596000 | -5.810860000 | -0.886051000 |



|   |              |              |              |
|---|--------------|--------------|--------------|
| C | -0.934042000 | 0.469726000  | -0.994706000 |
| C | -2.231871000 | -0.169721000 | -1.498216000 |
| H | -0.454968000 | 1.013702000  | -1.819923000 |
| H | -1.150847000 | 1.228594000  | -0.234523000 |
| C | -3.203296000 | 0.889229000  | -2.034515000 |
| H | -2.018706000 | -0.895192000 | -2.293742000 |
| H | -2.723047000 | -0.725286000 | -0.691209000 |
| C | -4.510532000 | 0.284386000  | -2.550962000 |
| H | -3.416442000 | 1.614403000  | -1.238231000 |
| H | -2.712431000 | 1.454149000  | -2.838971000 |
| H | -5.189074000 | 1.058979000  | -2.924823000 |
| H | -4.324504000 | -0.420816000 | -3.370341000 |
| H | -5.033336000 | -0.261906000 | -1.756397000 |
| C | -0.008534000 | -1.066643000 | 1.439422000  |
| C | -1.488619000 | -1.142376000 | 1.830487000  |
| H | 0.494161000  | -0.339742000 | 2.083434000  |
| H | 0.490876000  | -2.025816000 | 1.617234000  |
| C | -1.669781000 | -1.533653000 | 3.300744000  |
| H | -1.954227000 | -0.165125000 | 1.655886000  |
| H | -2.019043000 | -1.866054000 | 1.199456000  |
| C | -3.138430000 | -1.551130000 | 3.729158000  |
| H | -1.221295000 | -2.522726000 | 3.470877000  |
| H | -1.106864000 | -0.831468000 | 3.930007000  |
| H | -3.717114000 | -2.260315000 | 3.124668000  |
| H | -3.246839000 | -1.841900000 | 4.779863000  |
| H | -3.595656000 | -0.561976000 | 3.605605000  |
| C | 4.545819000  | 2.673351000  | -1.914503000 |
| C | 5.007915000  | 1.575051000  | -2.645810000 |
| C | 4.398064000  | 0.333290000  | -2.474516000 |
| C | 3.333797000  | 0.188543000  | -1.585324000 |
| C | 2.859198000  | 1.282022000  | -0.850438000 |
| C | 3.486453000  | 2.531360000  | -1.025755000 |
| H | 5.012706000  | 3.646466000  | -2.039948000 |
| H | 5.835775000  | 1.688195000  | -3.339954000 |
| H | 4.752549000  | -0.530103000 | -3.030918000 |
| H | 2.871180000  | -0.782551000 | -1.448127000 |
| H | 3.120986000  | 3.377169000  | -0.453023000 |
| C | 1.758806000  | 1.202438000  | 0.101917000  |
| C | 1.225226000  | 1.888818000  | 1.018088000  |
| C | 0.171680000  | 2.138662000  | 1.931316000  |
| O | -0.961269000 | 2.513258000  | 1.632468000  |
| O | 0.549191000  | 1.938095000  | 3.231049000  |
| C | -0.473657000 | 2.205928000  | 4.196333000  |
| H | -1.344154000 | 1.562468000  | 4.037218000  |

|                          |              |              |              |
|--------------------------|--------------|--------------|--------------|
| H                        | -0.019595000 | 1.996977000  | 5.166088000  |
| H                        | -0.797012000 | 3.249202000  | 4.142492000  |
| <b>TS<sub>2/3E</sub></b> |              |              |              |
| P                        | -1.488408000 | -1.204606000 | -0.931521000 |
| C                        | -1.357845000 | -2.228462000 | 0.582125000  |
| C                        | -0.337485000 | -3.369690000 | 0.589908000  |
| H                        | -2.371154000 | -2.604638000 | 0.777911000  |
| H                        | -1.132353000 | -1.514676000 | 1.380856000  |
| C                        | -0.316958000 | -4.085137000 | 1.945597000  |
| H                        | -0.553786000 | -4.092146000 | -0.209338000 |
| H                        | 0.657842000  | -2.954746000 | 0.402133000  |
| C                        | 0.776050000  | -5.152084000 | 2.024449000  |
| H                        | -0.160399000 | -3.338689000 | 2.734110000  |
| H                        | -1.299753000 | -4.538337000 | 2.136564000  |
| H                        | 1.766977000  | -4.704043000 | 1.884180000  |
| H                        | 0.771447000  | -5.655233000 | 2.997462000  |
| H                        | 0.643874000  | -5.918686000 | 1.250773000  |
| C                        | 0.160481000  | -0.833793000 | -1.635866000 |
| C                        | 0.819283000  | -1.960925000 | -2.443104000 |
| H                        | 0.785451000  | -0.518363000 | -0.801062000 |
| H                        | 0.015591000  | 0.058396000  | -2.254621000 |
| C                        | 2.206006000  | -1.562060000 | -2.972875000 |
| H                        | 0.920930000  | -2.860965000 | -1.826241000 |
| H                        | 0.181424000  | -2.234767000 | -3.291961000 |
| C                        | 3.250383000  | -1.338182000 | -1.874886000 |
| H                        | 2.550673000  | -2.353106000 | -3.651720000 |
| H                        | 2.109886000  | -0.652914000 | -3.582697000 |
| H                        | 4.241344000  | -1.169180000 | -2.311341000 |
| H                        | 3.011224000  | -0.472125000 | -1.252033000 |
| H                        | 3.319547000  | -2.218453000 | -1.223002000 |
| C                        | -2.406840000 | -2.183395000 | -2.180025000 |
| C                        | -2.662623000 | -1.406664000 | -3.481358000 |
| H                        | -3.360427000 | -2.478314000 | -1.730208000 |
| H                        | -1.837507000 | -3.100986000 | -2.362952000 |
| C                        | -3.496574000 | -2.202250000 | -4.494781000 |
| H                        | -3.183164000 | -0.474229000 | -3.241430000 |
| H                        | -1.706047000 | -1.124576000 | -3.940377000 |
| C                        | -2.809587000 | -3.469327000 | -5.011990000 |
| H                        | -4.461722000 | -2.460332000 | -4.038038000 |
| H                        | -3.725973000 | -1.544013000 | -5.342104000 |
| H                        | -2.639608000 | -4.199165000 | -4.212219000 |
| H                        | -3.417290000 | -3.962084000 | -5.778424000 |
| H                        | -1.835842000 | -3.233153000 | -5.459198000 |
| P                        | 1.546479000  | -0.434590000 | 1.855618000  |

|   |              |              |              |
|---|--------------|--------------|--------------|
| B | 1.544566000  | 1.350685000  | 1.095124000  |
| O | 1.228833000  | 2.541289000  | 1.680460000  |
| O | 2.242914000  | 1.467672000  | -0.077657000 |
| C | 1.989861000  | 3.572804000  | 0.968544000  |
| C | 2.314655000  | 2.886132000  | -0.412781000 |
| C | 1.138674000  | 4.830704000  | 0.867455000  |
| C | 3.234215000  | 3.827923000  | 1.824036000  |
| C | 3.717322000  | 3.162756000  | -0.944700000 |
| C | 1.275306000  | 3.142648000  | -1.503274000 |
| H | 1.667708000  | 5.601038000  | 0.294159000  |
| H | 0.176320000  | 4.628249000  | 0.395238000  |
| H | 0.957401000  | 5.226829000  | 1.872500000  |
| H | 3.840558000  | 2.923616000  | 1.928480000  |
| H | 3.855648000  | 4.623381000  | 1.400419000  |
| H | 2.915053000  | 4.134186000  | 2.824742000  |
| H | 3.860470000  | 2.628066000  | -1.889082000 |
| H | 3.853480000  | 4.232732000  | -1.137069000 |
| H | 4.487288000  | 2.829342000  | -0.245895000 |
| H | 1.488434000  | 2.476193000  | -2.346325000 |
| H | 0.258297000  | 2.955677000  | -1.155609000 |
| H | 1.331533000  | 4.175475000  | -1.862894000 |
| C | 3.260549000  | -0.258865000 | 2.540556000  |
| C | 3.547925000  | 0.549330000  | 3.651990000  |
| C | 4.317653000  | -0.897390000 | 1.878642000  |
| C | 4.861462000  | 0.709012000  | 4.090192000  |
| H | 2.737552000  | 1.055114000  | 4.167616000  |
| C | 5.634225000  | -0.727742000 | 2.310146000  |
| H | 4.106014000  | -1.526509000 | 1.018895000  |
| C | 5.909045000  | 0.074566000  | 3.417700000  |
| H | 5.069565000  | 1.337656000  | 4.952048000  |
| H | 6.443582000  | -1.227124000 | 1.784111000  |
| H | 6.932930000  | 0.203754000  | 3.757693000  |
| C | 0.503115000  | -0.352443000 | 3.364646000  |
| C | -0.630990000 | 0.467652000  | 3.424083000  |
| C | 0.756041000  | -1.238469000 | 4.426480000  |
| C | -1.495189000 | 0.398644000  | 4.517979000  |
| H | -0.847071000 | 1.160678000  | 2.622922000  |
| C | -0.101287000 | -1.293965000 | 5.523687000  |
| H | 1.634677000  | -1.878104000 | 4.396493000  |
| C | -1.235117000 | -0.477884000 | 5.570989000  |
| H | -2.372020000 | 1.040214000  | 4.537259000  |
| H | 0.112909000  | -1.978055000 | 6.340808000  |
| H | -1.907142000 | -0.527352000 | 6.423547000  |
| C | -5.544278000 | 1.839304000  | -1.804905000 |

|   |              |              |              |
|---|--------------|--------------|--------------|
| C | -6.478569000 | 0.858737000  | -1.464332000 |
| C | -6.055654000 | -0.290421000 | -0.795172000 |
| C | -4.707711000 | -0.458901000 | -0.480326000 |
| C | -3.755391000 | 0.510423000  | -0.832797000 |
| C | -4.195689000 | 1.668087000  | -1.497274000 |
| H | -5.865801000 | 2.740826000  | -2.319497000 |
| H | -7.527995000 | 0.992470000  | -1.711288000 |
| H | -6.776758000 | -1.050405000 | -0.505962000 |
| H | -4.395281000 | -1.339118000 | 0.076677000  |
| H | -3.468954000 | 2.430725000  | -1.756086000 |
| C | -2.309327000 | 0.345074000  | -0.515648000 |
| C | -1.468091000 | 1.211081000  | 0.078147000  |
| C | -1.873560000 | 2.531158000  | 0.477555000  |
| O | -1.743763000 | 3.551856000  | -0.200523000 |
| O | -2.330286000 | 2.582634000  | 1.767034000  |
| C | -2.518871000 | 3.898879000  | 2.295528000  |
| H | -3.178007000 | 4.488191000  | 1.653314000  |
| H | -2.969348000 | 3.757345000  | 3.279516000  |
| H | -1.559303000 | 4.414833000  | 2.392735000  |

**TS<sub>3Z/4R</sub>**

|   |                 |                 |                 |
|---|-----------------|-----------------|-----------------|
| P | -1.228997000000 | -1.669591000000 | -0.914609000000 |
| C | -0.633614000000 | -3.406107000000 | -0.895676000000 |
| C | 0.725535000000  | -3.637573000000 | -0.228583000000 |
| H | -0.633085000000 | -3.761679000000 | -1.934383000000 |
| H | -1.417470000000 | -3.966301000000 | -0.369270000000 |
| C | 1.073668000000  | -5.127242000000 | -0.151276000000 |
| H | 1.506150000000  | -3.097774000000 | -0.775859000000 |
| H | 0.718890000000  | -3.196155000000 | 0.772895000000  |
| C | 2.426273000000  | -5.372530000000 | 0.521206000000  |
| H | 0.284413000000  | -5.655853000000 | 0.401942000000  |
| H | 1.078951000000  | -5.558546000000 | -1.162532000000 |
| H | 2.433260000000  | -4.976552000000 | 1.543282000000  |
| H | 2.659189000000  | -6.441685000000 | 0.572223000000  |
| H | 3.234832000000  | -4.877667000000 | -0.029549000000 |
| C | -0.195372000000 | -0.640312000000 | -2.016274000000 |
| C | -0.182785000000 | -1.067521000000 | -3.491140000000 |
| H | 0.814813000000  | -0.641787000000 | -1.612220000000 |
| H | -0.579655000000 | 0.380284000000  | -1.905861000000 |
| C | 0.404626000000  | 0.036466000000  | -4.385909000000 |
| H | 0.411424000000  | -1.984753000000 | -3.598405000000 |
| H | -1.192116000000 | -1.302946000000 | -3.845633000000 |
| C | 1.806356000000  | 0.497258000000  | -3.976190000000 |
| H | 0.423147000000  | -0.330228000000 | -5.420018000000 |
| H | -0.277153000000 | 0.897781000000  | -4.374526000000 |

|   |                 |                 |                 |
|---|-----------------|-----------------|-----------------|
| H | 2.216518000000  | 1.194662000000  | -4.714259000000 |
| H | 1.793159000000  | 1.015564000000  | -3.011578000000 |
| H | 2.496979000000  | -0.351613000000 | -3.897941000000 |
| C | -2.871964000000 | -1.789887000000 | -1.728648000000 |
| C | -3.461998000000 | -0.429456000000 | -2.134856000000 |
| H | -3.530201000000 | -2.293816000000 | -1.014037000000 |
| H | -2.761867000000 | -2.456766000000 | -2.590512000000 |
| C | -4.971661000000 | -0.498972000000 | -2.394327000000 |
| H | -3.266897000000 | 0.312653000000  | -1.351703000000 |
| H | -2.951723000000 | -0.065846000000 | -3.037084000000 |
| C | -5.364241000000 | -1.425567000000 | -3.548142000000 |
| H | -5.471572000000 | -0.822394000000 | -1.471425000000 |
| H | -5.331828000000 | 0.516503000000  | -2.600287000000 |
| H | -5.090113000000 | -2.467187000000 | -3.343678000000 |
| H | -6.444887000000 | -1.400993000000 | -3.725159000000 |
| H | -4.866774000000 | -1.127086000000 | -4.479679000000 |
| P | -2.323643000000 | 2.247403000000  | 0.599108000000  |
| B | -1.178050000000 | 0.904184000000  | 2.493013000000  |
| O | -0.212534000000 | 1.569156000000  | 3.259254000000  |
| O | -2.313496000000 | 0.618532000000  | 3.264407000000  |
| C | -0.771399000000 | 1.837698000000  | 4.561708000000  |
| C | -1.943328000000 | 0.792097000000  | 4.648417000000  |
| C | 0.333453000000  | 1.636989000000  | 5.597130000000  |
| C | -1.245989000000 | 3.293552000000  | 4.589980000000  |
| C | -3.164643000000 | 1.254116000000  | 5.434149000000  |
| C | -1.487005000000 | -0.585721000000 | 5.147823000000  |
| H | -0.059230000000 | 1.748919000000  | 6.614393000000  |
| H | 0.795129000000  | 0.651477000000  | 5.505703000000  |
| H | 1.113703000000  | 2.390792000000  | 5.449775000000  |
| H | -2.046065000000 | 3.469729000000  | 3.871085000000  |
| H | -1.599177000000 | 3.580968000000  | 5.586444000000  |
| H | -0.402094000000 | 3.939714000000  | 4.326400000000  |
| H | -3.940308000000 | 0.482318000000  | 5.386911000000  |
| H | -2.908098000000 | 1.416508000000  | 6.487491000000  |
| H | -3.576509000000 | 2.177830000000  | 5.025696000000  |
| H | -2.291419000000 | -1.304261000000 | 4.964444000000  |
| H | -0.603040000000 | -0.925255000000 | 4.598579000000  |
| H | -1.253720000000 | -0.580801000000 | 6.217839000000  |
| C | -3.218270000000 | 3.499819000000  | 1.589473000000  |
| C | -3.033172000000 | 4.894162000000  | 1.531646000000  |
| C | -4.232978000000 | 3.010230000000  | 2.441719000000  |
| C | -3.809586000000 | 5.755717000000  | 2.305414000000  |
| H | -2.279168000000 | 5.309365000000  | 0.871964000000  |
| C | -5.006579000000 | 3.873446000000  | 3.212587000000  |

|   |                 |                 |                 |
|---|-----------------|-----------------|-----------------|
| H | -4.389662000000 | 1.938939000000  | 2.515098000000  |
| C | -4.797290000000 | 5.253942000000  | 3.154520000000  |
| H | -3.642339000000 | 6.828403000000  | 2.241341000000  |
| H | -5.775539000000 | 3.466503000000  | 3.865177000000  |
| H | -5.399487000000 | 5.928118000000  | 3.757363000000  |
| C | -1.039146000000 | 3.228796000000  | -0.273658000000 |
| C | -0.117936000000 | 4.062185000000  | 0.388240000000  |
| C | -0.883193000000 | 3.053244000000  | -1.659029000000 |
| C | 0.899086000000  | 4.706879000000  | -0.311633000000 |
| H | -0.189401000000 | 4.173164000000  | 1.465408000000  |
| C | 0.156007000000  | 3.670902000000  | -2.359494000000 |
| H | -1.601391000000 | 2.436859000000  | -2.195504000000 |
| C | 1.048451000000  | 4.506772000000  | -1.688444000000 |
| H | 1.591764000000  | 5.355555000000  | 0.219782000000  |
| H | 0.253872000000  | 3.516348000000  | -3.431560000000 |
| H | 1.849772000000  | 5.001736000000  | -2.230485000000 |
| C | -5.061268000000 | -1.499028000000 | 1.934292000000  |
| C | -4.934112000000 | -2.679779000000 | 2.670756000000  |
| C | -3.689387000000 | -3.300397000000 | 2.769879000000  |
| C | -2.578664000000 | -2.741197000000 | 2.133641000000  |
| C | -2.694927000000 | -1.555722000000 | 1.396538000000  |
| C | -3.953165000000 | -0.942779000000 | 1.300343000000  |
| H | -6.025566000000 | -1.003238000000 | 1.862272000000  |
| H | -5.799692000000 | -3.110149000000 | 3.166777000000  |
| H | -3.578601000000 | -4.215441000000 | 3.345436000000  |
| H | -1.602292000000 | -3.209535000000 | 2.228091000000  |
| H | -4.042183000000 | -0.008493000000 | 0.757135000000  |
| C | -1.475282000000 | -0.998846000000 | 0.726523000000  |
| C | -0.708616000000 | -0.002738000000 | 1.286453000000  |
| C | 0.685084000000  | 0.189753000000  | 0.810329000000  |
| O | 1.412103000000  | -0.736709000000 | 0.458682000000  |
| O | 1.115642000000  | 1.452243000000  | 0.852023000000  |
| C | 2.485943000000  | 1.661438000000  | 0.497769000000  |
| H | 2.664878000000  | 1.360544000000  | -0.538520000000 |
| H | 2.647666000000  | 2.731693000000  | 0.610296000000  |
| H | 3.142815000000  | 1.088102000000  | 1.156739000000  |

**TS<sub>3Z/4S</sub>**

|   |             |             |             |
|---|-------------|-------------|-------------|
| P | -1.19262400 | -1.75535700 | -0.89607900 |
| C | -0.59067500 | -1.36071700 | -2.59239100 |
| C | -1.43897300 | -0.28566000 | -3.28296400 |
| H | -0.61730000 | -2.29817900 | -3.15895900 |
| H | 0.44844500  | -1.04195600 | -2.51468100 |
| C | -0.95063600 | 0.01563500  | -4.70329900 |
| H | -2.49128700 | -0.60025000 | -3.31814600 |

|   |             |             |             |
|---|-------------|-------------|-------------|
| H | -1.41744900 | 0.63457800  | -2.68807300 |
| C | -1.78172900 | 1.10590000  | -5.38327800 |
| H | 0.10268700  | 0.32423900  | -4.66056000 |
| H | -0.97813100 | -0.90393100 | -5.30416500 |
| H | -1.74703200 | 2.04019700  | -4.81081400 |
| H | -1.41354700 | 1.31651000  | -6.39296800 |
| H | -2.83355100 | 0.80669800  | -5.46604500 |
| C | -2.61078600 | -2.89328200 | -1.18484700 |
| C | -2.27237500 | -4.16287100 | -1.97801600 |
| H | -3.39850100 | -2.32480200 | -1.68759900 |
| H | -3.01855600 | -3.15014300 | -0.20262200 |
| C | -3.44479400 | -5.15099400 | -1.98748400 |
| H | -2.01571500 | -3.90513700 | -3.01317500 |
| H | -1.39002300 | -4.66140600 | -1.55670100 |
| C | -3.14060500 | -6.41665300 | -2.79128000 |
| H | -3.69513700 | -5.41852900 | -0.95201700 |
| H | -4.33324000 | -4.65229200 | -2.39742300 |
| H | -3.98924000 | -7.10866800 | -2.77970600 |
| H | -2.91893100 | -6.17694500 | -3.83818500 |
| H | -2.27206500 | -6.94541500 | -2.38055400 |
| C | 0.06685000  | -2.77370800 | -0.02546700 |
| C | -0.50604000 | -3.64261800 | 1.10091200  |
| H | 0.80506400  | -2.06602800 | 0.35519500  |
| H | 0.56151200  | -3.38302600 | -0.79163100 |
| C | 0.59300700  | -4.35228900 | 1.90407200  |
| H | -1.09100000 | -3.01552500 | 1.77973300  |
| H | -1.18903600 | -4.39776800 | 0.69243400  |
| C | 1.41703700  | -5.35003200 | 1.08553100  |
| H | 1.25689500  | -3.60000000 | 2.34973800  |
| H | 0.11772600  | -4.87842600 | 2.74153800  |
| H | 1.99080200  | -4.85465800 | 0.29414300  |
| H | 2.13220300  | -5.88333600 | 1.72057000  |
| H | 0.76957400  | -6.09837400 | 0.61084700  |
| P | 0.01497400  | 1.41259600  | 2.71722700  |
| B | -1.73337600 | 2.02548900  | 1.15590500  |
| O | -3.01109500 | 1.90232900  | 1.74120700  |
| O | -1.50677000 | 3.37676000  | 0.79177400  |
| C | -3.62511000 | 3.20127300  | 1.81319200  |
| C | -2.78602200 | 4.02969600  | 0.77281000  |
| C | -5.10372700 | 3.03749800  | 1.46021500  |
| C | -3.51133500 | 3.73856400  | 3.24422600  |
| C | -2.59189700 | 5.50061700  | 1.12750600  |
| C | -3.32762600 | 3.90348800  | -0.66003400 |
| H | -5.61648400 | 4.00672300  | 1.46065300  |

|   |             |             |             |
|---|-------------|-------------|-------------|
| H | -5.23744600 | 2.56470800  | 0.48660500  |
| H | -5.58224300 | 2.39450000  | 2.20577900  |
| H | -2.47292300 | 3.86023500  | 3.55257200  |
| H | -4.02238400 | 4.70196800  | 3.34756800  |
| H | -3.99332700 | 3.03066500  | 3.92647000  |
| H | -1.97870700 | 5.98407200  | 0.35929700  |
| H | -3.55493700 | 6.02263300  | 1.17213400  |
| H | -2.08302400 | 5.61103600  | 2.08631600  |
| H | -2.58907800 | 4.32428100  | -1.34957200 |
| H | -3.47951100 | 2.85215500  | -0.92512200 |
| H | -4.27529000 | 4.43618900  | -0.79467600 |
| C | -0.08327100 | 2.92779000  | 3.74031700  |
| C | -0.34879800 | 2.94267600  | 5.12251700  |
| C | 0.23429500  | 4.15351700  | 3.11987300  |
| C | -0.32916900 | 4.13431200  | 5.84574900  |
| H | -0.57320600 | 2.01420900  | 5.63681400  |
| C | 0.25383100  | 5.34208300  | 3.84634000  |
| H | 0.43040000  | 4.17099500  | 2.05382500  |
| C | -0.03476300 | 5.34339100  | 5.21308200  |
| H | -0.54324100 | 4.11609800  | 6.91187000  |
| H | 0.49028200  | 6.27502200  | 3.33976100  |
| H | -0.02337000 | 6.27171800  | 5.77775900  |
| C | -0.93424900 | 0.16124500  | 3.66916100  |
| C | -2.15107700 | 0.41085400  | 4.33293300  |
| C | -0.44684700 | -1.15813400 | 3.68267700  |
| C | -2.83479200 | -0.60713200 | 4.99328600  |
| H | -2.56491600 | 1.40926500  | 4.31962100  |
| C | -1.13508900 | -2.18368700 | 4.33593700  |
| H | 0.49967000  | -1.37110200 | 3.19159100  |
| C | -2.33363700 | -1.91215000 | 4.99735600  |
| H | -3.77185900 | -0.38377400 | 5.49743500  |
| H | -0.72434000 | -3.19018400 | 4.34393600  |
| H | -2.86680700 | -2.70500600 | 5.51530400  |
| C | -5.66804600 | -0.31477300 | -0.09317400 |
| C | -5.98833800 | -0.92228500 | 1.12236200  |
| C | -4.96589200 | -1.33323500 | 1.97886500  |
| C | -3.63181000 | -1.14368000 | 1.62315400  |
| C | -3.30258400 | -0.52583400 | 0.41272400  |
| C | -4.33282600 | -0.12023700 | -0.44475000 |
| H | -6.45733200 | 0.01609300  | -0.76287000 |
| H | -7.02814500 | -1.06940000 | 1.40091200  |
| H | -5.20001300 | -1.79278800 | 2.93487400  |
| H | -2.84229300 | -1.44122600 | 2.30183400  |
| H | -4.07995900 | 0.36679200  | -1.38315800 |



|   |             |             |             |
|---|-------------|-------------|-------------|
| C | -1.87307500 | -0.33653900 | 0.00865800  |
| C | -1.20921700 | 0.84474600  | 0.22845300  |
| C | 0.18355100  | 0.95529000  | -0.29882400 |
| O | 0.88135000  | -0.00943200 | -0.60356900 |
| O | 0.60839900  | 2.20822100  | -0.45400200 |
| C | 1.98283800  | 2.35877000  | -0.83316800 |
| H | 2.16954000  | 1.89396700  | -1.80534800 |
| H | 2.15002800  | 3.43439000  | -0.88133600 |
| H | 2.63010200  | 1.90022800  | -0.08155400 |

**TS<sub>3E/4R</sub>**

|   |              |              |              |
|---|--------------|--------------|--------------|
| P | -1.134430000 | -2.010791000 | 0.191816000  |
| C | -0.698824000 | -2.666364000 | -1.470796000 |
| C | 0.112780000  | -1.684323000 | -2.322340000 |
| H | -0.160694000 | -3.612221000 | -1.334214000 |
| H | -1.644362000 | -2.910171000 | -1.969866000 |
| C | 0.519631000  | -2.299012000 | -3.665830000 |
| H | 1.003063000  | -1.363451000 | -1.769822000 |
| H | -0.486192000 | -0.781037000 | -2.485777000 |
| C | 1.313275000  | -1.332519000 | -4.547698000 |
| H | -0.382975000 | -2.627457000 | -4.199973000 |
| H | 1.114444000  | -3.205441000 | -3.484865000 |
| H | 0.731567000  | -0.430450000 | -4.768005000 |
| H | 1.586211000  | -1.798760000 | -5.500659000 |
| H | 2.238621000  | -1.014955000 | -4.053458000 |
| C | 0.358724000  | -2.050580000 | 1.232096000  |
| C | 1.159281000  | -3.357994000 | 1.131258000  |
| H | 0.964266000  | -1.187159000 | 0.953067000  |
| H | 0.016205000  | -1.881349000 | 2.255572000  |
| C | 2.339681000  | -3.381126000 | 2.114056000  |
| H | 1.545797000  | -3.481846000 | 0.111408000  |
| H | 0.512256000  | -4.222194000 | 1.332211000  |
| C | 3.400331000  | -2.319063000 | 1.815735000  |
| H | 2.799291000  | -4.377445000 | 2.080622000  |
| H | 1.956871000  | -3.243159000 | 3.132264000  |
| H | 4.234692000  | -2.389485000 | 2.522183000  |
| H | 2.986555000  | -1.309359000 | 1.887504000  |
| H | 3.806832000  | -2.444837000 | 0.804499000  |
| C | -2.292900000 | -3.254061000 | 0.878636000  |
| C | -2.783405000 | -2.940065000 | 2.298004000  |
| H | -3.142697000 | -3.328049000 | 0.194358000  |
| H | -1.765844000 | -4.214020000 | 0.843046000  |
| C | -3.901686000 | -3.885572000 | 2.755193000  |
| H | -3.151535000 | -1.910614000 | 2.330338000  |
| H | -1.941722000 | -2.993664000 | 2.997010000  |

|   |              |              |              |
|---|--------------|--------------|--------------|
| C | -3.481672000 | -5.355652000 | 2.839958000  |
| H | -4.758008000 | -3.779228000 | 2.075406000  |
| H | -4.250320000 | -3.551491000 | 3.740609000  |
| H | -3.215725000 | -5.762462000 | 1.857377000  |
| H | -4.291760000 | -5.974780000 | 3.239876000  |
| H | -2.611828000 | -5.478268000 | 3.497417000  |
| P | -0.866323000 | 2.037608000  | 2.216907000  |
| B | 0.160942000  | 1.342339000  | 0.038447000  |
| O | 1.338425000  | 0.560564000  | 0.128034000  |
| O | 0.456547000  | 2.555618000  | -0.622643000 |
| C | 2.457724000  | 1.362915000  | -0.332258000 |
| C | 1.751397000  | 2.443153000  | -1.227738000 |
| C | 3.425583000  | 0.449777000  | -1.079732000 |
| C | 3.159880000  | 1.969212000  | 0.884589000  |
| C | 2.421671000  | 3.813622000  | -1.222165000 |
| C | 1.527862000  | 1.975924000  | -2.672156000 |
| H | 4.249268000  | 1.032625000  | -1.506786000 |
| H | 2.931419000  | -0.091904000 | -1.888971000 |
| H | 3.853562000  | -0.283736000 | -0.389477000 |
| H | 2.489590000  | 2.621746000  | 1.447101000  |
| H | 4.039551000  | 2.547892000  | 0.585083000  |
| H | 3.497291000  | 1.162089000  | 1.542279000  |
| H | 1.848721000  | 4.498760000  | -1.855426000 |
| H | 3.440140000  | 3.751810000  | -1.623114000 |
| H | 2.455893000  | 4.236385000  | -0.217475000 |
| H | 0.865260000  | 2.691236000  | -3.168531000 |
| H | 1.039655000  | 0.999387000  | -2.694440000 |
| H | 2.462430000  | 1.914472000  | -3.239925000 |
| C | 0.254538000  | 3.457844000  | 2.516545000  |
| C | 1.079217000  | 3.617026000  | 3.646604000  |
| C | 0.193661000  | 4.520399000  | 1.590893000  |
| C | 1.841859000  | 4.771015000  | 3.822930000  |
| H | 1.120105000  | 2.836906000  | 4.399045000  |
| C | 0.955647000  | 5.672243000  | 1.773186000  |
| H | -0.446910000 | 4.426073000  | 0.721574000  |
| C | 1.793324000  | 5.802346000  | 2.883625000  |
| H | 2.473297000  | 4.865492000  | 4.703342000  |
| H | 0.896566000  | 6.473357000  | 1.040200000  |
| H | 2.390772000  | 6.699648000  | 3.020722000  |
| C | -0.197001000 | 0.698474000  | 3.284947000  |
| C | 1.163828000  | 0.427774000  | 3.528871000  |
| C | -1.142961000 | -0.148998000 | 3.893987000  |
| C | 1.556058000  | -0.614975000 | 4.364753000  |
| H | 1.918027000  | 1.047418000  | 3.063053000  |

|   |              |              |              |
|---|--------------|--------------|--------------|
| C | -0.753592000 | -1.205117000 | 4.720873000  |
| H | -2.199970000 | 0.047046000  | 3.734738000  |
| C | 0.600086000  | -1.440620000 | 4.965676000  |
| H | 2.613645000  | -0.791844000 | 4.543428000  |
| H | -1.509520000 | -1.830072000 | 5.190085000  |
| H | 0.908204000  | -2.249398000 | 5.622790000  |
| C | -5.548895000 | 0.313532000  | 0.933377000  |
| C | -6.256734000 | -0.498962000 | 0.045671000  |
| C | -5.558358000 | -1.281593000 | -0.875517000 |
| C | -4.164507000 | -1.257779000 | -0.898594000 |
| C | -3.438228000 | -0.472429000 | 0.011354000  |
| C | -4.154942000 | 0.324927000  | 0.921584000  |
| H | -6.082101000 | 0.939026000  | 1.643795000  |
| H | -7.342809000 | -0.513130000 | 0.062333000  |
| H | -6.098880000 | -1.896569000 | -1.590165000 |
| H | -3.633683000 | -1.832175000 | -1.653137000 |
| H | -3.602019000 | 0.960479000  | 1.607524000  |
| C | -1.944523000 | -0.430249000 | 0.036104000  |
| C | -1.287406000 | 0.769434000  | -0.165417000 |
| C | -2.131839000 | 1.850080000  | -0.803040000 |
| O | -2.516045000 | 2.896364000  | -0.335716000 |
| O | -2.366422000 | 1.487275000  | -2.093614000 |
| C | -3.122237000 | 2.442076000  | -2.851071000 |
| H | -4.106788000 | 2.592194000  | -2.400079000 |
| H | -3.218173000 | 2.013388000  | -3.849450000 |
| H | -2.599051000 | 3.401074000  | -2.890458000 |

**TS<sub>3E/4S</sub>**

|   |              |              |              |
|---|--------------|--------------|--------------|
| P | -1.062575000 | -2.049675000 | -0.114235000 |
| C | -0.646919000 | -2.680660000 | 1.563313000  |
| C | 0.131208000  | -1.674782000 | 2.418148000  |
| H | -0.089057000 | -3.617769000 | 1.446433000  |
| H | -1.596743000 | -2.936740000 | 2.047705000  |
| C | 0.526175000  | -2.266892000 | 3.775213000  |
| H | 1.024828000  | -1.343500000 | 1.877391000  |
| H | -0.486801000 | -0.780977000 | 2.561589000  |
| C | 1.283951000  | -1.274596000 | 4.660025000  |
| H | -0.378984000 | -2.607931000 | 4.297004000  |
| H | 1.142385000  | -3.162814000 | 3.614747000  |
| H | 0.679850000  | -0.382541000 | 4.859959000  |
| H | 1.549564000  | -1.724566000 | 5.622830000  |
| H | 2.211122000  | -0.943051000 | 4.178512000  |
| C | 0.454753000  | -2.068850000 | -1.120199000 |
| C | 1.273494000  | -3.363049000 | -0.997183000 |
| H | 1.040226000  | -1.195570000 | -0.829146000 |

|   |              |              |              |
|---|--------------|--------------|--------------|
| H | 0.135039000  | -1.906583000 | -2.152028000 |
| C | 2.470172000  | -3.373824000 | -1.960080000 |
| H | 1.644520000  | -3.474085000 | 0.029847000  |
| H | 0.644145000  | -4.238804000 | -1.203456000 |
| C | 3.507134000  | -2.290506000 | -1.654452000 |
| H | 2.946518000  | -4.361553000 | -1.910287000 |
| H | 2.101646000  | -3.251190000 | -2.985512000 |
| H | 4.355273000  | -2.354231000 | -2.344951000 |
| H | 3.077700000  | -1.288833000 | -1.745084000 |
| H | 3.897327000  | -2.398215000 | -0.634712000 |
| C | -2.178913000 | -3.324691000 | -0.812038000 |
| C | -2.641788000 | -3.040454000 | -2.246521000 |
| H | -3.042889000 | -3.409938000 | -0.146968000 |
| H | -1.630738000 | -4.271488000 | -0.751651000 |
| C | -3.689489000 | -4.047822000 | -2.738050000 |
| H | -3.065780000 | -2.033035000 | -2.292436000 |
| H | -1.777497000 | -3.047453000 | -2.919214000 |
| C | -3.181997000 | -5.490544000 | -2.814763000 |
| H | -4.570717000 | -3.995500000 | -2.084273000 |
| H | -4.027601000 | -3.730292000 | -3.732549000 |
| H | -2.924446000 | -5.886922000 | -1.825791000 |
| H | -3.941583000 | -6.153392000 | -3.242717000 |
| H | -2.285950000 | -5.558868000 | -3.444347000 |
| P | -0.836704000 | 1.983178000  | -2.178220000 |
| B | 0.161551000  | 1.331825000  | 0.025135000  |
| O | 1.355078000  | 0.571750000  | -0.031372000 |
| O | 0.421876000  | 2.558803000  | 0.676103000  |
| C | 2.449853000  | 1.400364000  | 0.440149000  |
| C | 1.706384000  | 2.477868000  | 1.307794000  |
| C | 3.419581000  | 0.513945000  | 1.217050000  |
| C | 3.164373000  | 2.003485000  | -0.771116000 |
| C | 2.352150000  | 3.859968000  | 1.298327000  |
| C | 1.462501000  | 2.023697000  | 2.753052000  |
| H | 4.225830000  | 1.115803000  | 1.650991000  |
| H | 2.920141000  | -0.026005000 | 2.024220000  |
| H | 3.871908000  | -0.220700000 | 0.543747000  |
| H | 2.492950000  | 2.634742000  | -1.356122000 |
| H | 4.026846000  | 2.603228000  | -0.463162000 |
| H | 3.529633000  | 1.193657000  | -1.410360000 |
| H | 1.753517000  | 4.542983000  | 1.909729000  |
| H | 3.362487000  | 3.821209000  | 1.722174000  |
| H | 2.401283000  | 4.270221000  | 0.289079000  |
| H | 0.777909000  | 2.732926000  | 3.227830000  |
| H | 0.990623000  | 1.039160000  | 2.776860000  |

|   |              |              |              |
|---|--------------|--------------|--------------|
| H | 2.386568000  | 1.984859000  | 3.339705000  |
| C | 0.259416000  | 3.424326000  | -2.469903000 |
| C | 1.104472000  | 3.589912000  | -3.583855000 |
| C | 0.156203000  | 4.494563000  | -1.556872000 |
| C | 1.846169000  | 4.758130000  | -3.755983000 |
| H | 1.177462000  | 2.803662000  | -4.327449000 |
| C | 0.897334000  | 5.660532000  | -1.735005000 |
| H | -0.501064000 | 4.395766000  | -0.700613000 |
| C | 1.755737000  | 5.797455000  | -2.828648000 |
| H | 2.493996000  | 4.857391000  | -4.623872000 |
| H | 0.805519000  | 6.467511000  | -1.011892000 |
| H | 2.336776000  | 6.705969000  | -2.962420000 |
| C | -0.120218000 | 0.647845000  | -3.220256000 |
| C | 1.250092000  | 0.403439000  | -3.437335000 |
| C | -1.037201000 | -0.225954000 | -3.836491000 |
| C | 1.679107000  | -0.639990000 | -4.254056000 |
| H | 1.982580000  | 1.044258000  | -2.965802000 |
| C | -0.610946000 | -1.281887000 | -4.645253000 |
| H | -2.100776000 | -0.051111000 | -3.697542000 |
| C | 0.751553000  | -1.491829000 | -4.862852000 |
| H | 2.743219000  | -0.796547000 | -4.411752000 |
| H | -1.344981000 | -1.927235000 | -5.121598000 |
| H | 1.088252000  | -2.300999000 | -5.505292000 |
| C | -5.508728000 | 0.172951000  | -0.958671000 |
| C | -6.215092000 | -0.643784000 | -0.073707000 |
| C | -5.517150000 | -1.400948000 | 0.868823000  |
| C | -4.124723000 | -1.347878000 | 0.915858000  |
| C | -3.399025000 | -0.557734000 | 0.009592000  |
| C | -4.115732000 | 0.213791000  | -0.922602000 |
| H | -6.042220000 | 0.778838000  | -1.685673000 |
| H | -7.300181000 | -0.680854000 | -0.109147000 |
| H | -6.057461000 | -2.018793000 | 1.581149000  |
| H | -3.595441000 | -1.901989000 | 1.686453000  |
| H | -3.563826000 | 0.853220000  | -1.605695000 |
| C | -1.906312000 | -0.483987000 | 0.011046000  |
| C | -1.278188000 | 0.731208000  | 0.210714000  |
| C | -2.156268000 | 1.801782000  | 0.818957000  |
| O | -2.551043000 | 2.834953000  | 0.331546000  |
| O | -2.409451000 | 1.449631000  | 2.109004000  |
| C | -3.199704000 | 2.397967000  | 2.839007000  |
| H | -4.176929000 | 2.523824000  | 2.365244000  |
| H | -3.308965000 | 1.978728000  | 3.840019000  |
| H | -2.696054000 | 3.367382000  | 2.878298000  |

TS<sub>4R/5R</sub>

|   |              |              |              |
|---|--------------|--------------|--------------|
| P | -1.526614000 | -1.661311000 | -0.652798000 |
| C | -3.353189000 | -1.416281000 | -0.960668000 |
| C | -3.904075000 | 0.010544000  | -0.913644000 |
| H | -3.823877000 | -2.010335000 | -0.166772000 |
| H | -3.617633000 | -1.902080000 | -1.906673000 |
| C | -5.432696000 | 0.029505000  | -0.811468000 |
| H | -3.474686000 | 0.546537000  | -0.058580000 |
| H | -3.579883000 | 0.566882000  | -1.796954000 |
| C | -5.996207000 | 1.451693000  | -0.767085000 |
| H | -5.865683000 | -0.514944000 | -1.662711000 |
| H | -5.743273000 | -0.518335000 | 0.089954000  |
| H | -7.088921000 | 1.449746000  | -0.685753000 |
| H | -5.595750000 | 2.004587000  | 0.091042000  |
| H | -5.728031000 | 2.009210000  | -1.672602000 |
| C | -1.512680000 | -3.453093000 | -0.188831000 |
| C | -2.140638000 | -4.401145000 | -1.217427000 |
| H | -2.013009000 | -3.560357000 | 0.777413000  |
| H | -0.459994000 | -3.711911000 | -0.022365000 |
| C | -1.989370000 | -5.871573000 | -0.810337000 |
| H | -3.207063000 | -4.172357000 | -1.337276000 |
| H | -1.682590000 | -4.256636000 | -2.205049000 |
| C | -2.619673000 | -6.832291000 | -1.820867000 |
| H | -0.922068000 | -6.104187000 | -0.692865000 |
| H | -2.444649000 | -6.020102000 | 0.178164000  |
| H | -3.693306000 | -6.638288000 | -1.932746000 |
| H | -2.158924000 | -6.722549000 | -2.810200000 |
| H | -2.499362000 | -7.875839000 | -1.510135000 |
| C | -0.605315000 | -1.665043000 | -2.254533000 |
| C | -1.441527000 | -1.432674000 | -3.514849000 |
| H | -0.097932000 | -2.636485000 | -2.308629000 |
| H | 0.176911000  | -0.914421000 | -2.170591000 |
| C | -0.558646000 | -1.361432000 | -4.765405000 |
| H | -2.183499000 | -2.232266000 | -3.644509000 |
| H | -1.994710000 | -0.493835000 | -3.411488000 |
| C | -1.363860000 | -1.118498000 | -6.043638000 |
| H | 0.178523000  | -0.558147000 | -4.632361000 |
| H | 0.016767000  | -2.293098000 | -4.861121000 |
| H | -0.713335000 | -1.062653000 | -6.923527000 |
| H | -2.088169000 | -1.924459000 | -6.214190000 |
| H | -1.924486000 | -0.178069000 | -5.981013000 |
| P | -0.698047000 | 1.755557000  | 2.125302000  |
| B | 1.150384000  | -0.150506000 | 0.478640000  |
| O | 2.084605000  | -0.500522000 | 1.459144000  |
| O | 1.708868000  | -0.299651000 | -0.806085000 |

|   |              |              |              |
|---|--------------|--------------|--------------|
| C | 3.135231000  | -1.248809000 | 0.803430000  |
| C | 3.088697000  | -0.684280000 | -0.663723000 |
| C | 4.437775000  | -0.991997000 | 1.551942000  |
| C | 2.766557000  | -2.734471000 | 0.877507000  |
| C | 3.425711000  | -1.700171000 | -1.752431000 |
| C | 3.931002000  | 0.582685000  | -0.855334000 |
| H | 5.278474000  | -1.490258000 | 1.056152000  |
| H | 4.655320000  | 0.076191000  | 1.619732000  |
| H | 4.359299000  | -1.386871000 | 2.569794000  |
| H | 2.679295000  | -3.029920000 | 1.927316000  |
| H | 1.803675000  | -2.919377000 | 0.392243000  |
| H | 3.527690000  | -3.364925000 | 0.407212000  |
| H | 2.738676000  | -2.548947000 | -1.733344000 |
| H | 3.345350000  | -1.223359000 | -2.734623000 |
| H | 4.449637000  | -2.074226000 | -1.639345000 |
| H | 3.696313000  | 1.333062000  | -0.095962000 |
| H | 5.004406000  | 0.368726000  | -0.821235000 |
| H | 3.694438000  | 1.014563000  | -1.832455000 |
| C | -0.213335000 | 0.949234000  | 3.725032000  |
| C | 1.091607000  | 0.615102000  | 4.117360000  |
| C | -1.250376000 | 0.791626000  | 4.654576000  |
| C | 1.341828000  | 0.117312000  | 5.393618000  |
| H | 1.910107000  | 0.717986000  | 3.420330000  |
| C | -1.000414000 | 0.294671000  | 5.933990000  |
| H | -2.264688000 | 1.047655000  | 4.365230000  |
| C | 0.297945000  | -0.045748000 | 6.307110000  |
| H | 2.358597000  | -0.142810000 | 5.677547000  |
| H | -1.822166000 | 0.169907000  | 6.633950000  |
| H | 0.497639000  | -0.433154000 | 7.302854000  |
| C | 0.600850000  | 3.074317000  | 2.064008000  |
| C | 0.173630000  | 4.381978000  | 2.326033000  |
| C | 1.960637000  | 2.855290000  | 1.798599000  |
| C | 1.078958000  | 5.445666000  | 2.332250000  |
| H | -0.879405000 | 4.567666000  | 2.521821000  |
| C | 2.864231000  | 3.915071000  | 1.796895000  |
| H | 2.311195000  | 1.852569000  | 1.589787000  |
| C | 2.427455000  | 5.215143000  | 2.064804000  |
| H | 0.728160000  | 6.453068000  | 2.540839000  |
| H | 3.914298000  | 3.726811000  | 1.586188000  |
| H | 3.134322000  | 6.040595000  | 2.063987000  |
| C | -0.891045000 | -2.700383000 | 4.033151000  |
| C | -2.237965000 | -2.578403000 | 4.379432000  |
| C | -3.093838000 | -1.850003000 | 3.554749000  |
| C | -2.601271000 | -1.255475000 | 2.392313000  |

|   |              |              |              |
|---|--------------|--------------|--------------|
| C | -1.255496000 | -1.396188000 | 2.006913000  |
| C | -0.411098000 | -2.125167000 | 2.858847000  |
| H | -0.210946000 | -3.245462000 | 4.681967000  |
| H | -2.612202000 | -3.035278000 | 5.291575000  |
| H | -4.141144000 | -1.731130000 | 3.821069000  |
| H | -3.265683000 | -0.661266000 | 1.773394000  |
| H | 0.634765000  | -2.210559000 | 2.596295000  |
| C | -0.762642000 | -0.843140000 | 0.695277000  |
| C | -0.203291000 | 0.610836000  | 0.666117000  |
| C | -0.535520000 | 1.357186000  | -0.591903000 |
| O | -1.238903000 | 0.943403000  | -1.502289000 |
| O | 0.071441000  | 2.553568000  | -0.663141000 |
| C | -0.157833000 | 3.307151000  | -1.858742000 |
| H | 0.221368000  | 2.763752000  | -2.728626000 |
| H | -1.225146000 | 3.499981000  | -1.995278000 |
| H | 0.387313000  | 4.240461000  | -1.718180000 |

**TS<sub>4R/5S</sub>**

|   |             |             |            |
|---|-------------|-------------|------------|
| P | -1.17476100 | 0.85472800  | 1.45571600 |
| C | -2.91567000 | 1.40264800  | 1.69845500 |
| C | -3.97910300 | 0.31784100  | 1.47682400 |
| H | -3.07898500 | 2.23456800  | 1.00682200 |
| H | -2.98468200 | 1.80823800  | 2.71512500 |
| C | -5.36622500 | 0.90985300  | 1.21143600 |
| H | -3.69776600 | -0.30422200 | 0.62447300 |
| H | -4.02064600 | -0.34754500 | 2.34877900 |
| C | -6.41994900 | -0.17266600 | 0.97194400 |
| H | -5.66641800 | 1.54692700  | 2.05525500 |
| H | -5.30260400 | 1.56137600  | 0.33060100 |
| H | -7.40560500 | 0.26378700  | 0.77715800 |
| H | -6.15055500 | -0.79083100 | 0.10705400 |
| H | -6.51270300 | -0.83768200 | 1.83927900 |
| C | -0.21001900 | 2.23974800  | 2.24055000 |
| C | -0.05028700 | 3.48501600  | 1.36695400 |
| H | 0.77362500  | 1.84350400  | 2.50184100 |
| H | -0.71657300 | 2.48342900  | 3.18427900 |
| C | 0.71615000  | 4.60661000  | 2.07685100 |
| H | 0.47977000  | 3.20674200  | 0.44897300 |
| H | -1.03149100 | 3.86480700  | 1.05729100 |
| C | 1.03956200  | 5.76914600  | 1.13572300 |
| H | 0.12952600  | 4.96549900  | 2.93369500 |
| H | 1.64904200  | 4.20640500  | 2.49688000 |
| H | 1.56953600  | 6.57357500  | 1.65757800 |
| H | 1.67153700  | 5.42956900  | 0.30654900 |
| H | 0.12534400  | 6.19511800  | 0.70496000 |



|   |             |             |             |
|---|-------------|-------------|-------------|
| C | -0.93946100 | -0.60515600 | 2.56780800  |
| C | 0.02279700  | -0.46769200 | 3.75041700  |
| H | -0.61087700 | -1.41322100 | 1.91051400  |
| H | -1.93914600 | -0.87897700 | 2.92492200  |
| C | 0.21667300  | -1.81545500 | 4.45513200  |
| H | 0.99667200  | -0.12349200 | 3.38734800  |
| H | -0.33764500 | 0.27869600  | 4.47139000  |
| C | 1.19671800  | -1.73217700 | 5.62695600  |
| H | -0.75422500 | -2.19072800 | 4.80795800  |
| H | 0.57963300  | -2.54483200 | 3.71840700  |
| H | 2.18333600  | -1.39158900 | 5.28969700  |
| H | 0.84536100  | -1.02519300 | 6.38843400  |
| H | 1.32694200  | -2.70669400 | 6.11026700  |
| P | 1.81226800  | -0.09811100 | 0.47507100  |
| B | -0.46397600 | -1.25038200 | -0.84325400 |
| O | -0.30121300 | -2.30248600 | 0.08879500  |
| O | -1.16552800 | -1.70601600 | -1.97314400 |
| C | -1.17016700 | -3.37869500 | -0.30244300 |
| C | -1.35308900 | -3.12611800 | -1.84768000 |
| C | -0.47741400 | -4.69057500 | 0.05710000  |
| C | -2.47944500 | -3.24499300 | 0.48484200  |
| C | -2.73541000 | -3.48368600 | -2.39221500 |
| C | -0.27602300 | -3.80517100 | -2.70105600 |
| H | -1.05096700 | -5.55219100 | -0.30355100 |
| H | 0.52967700  | -4.73047700 | -0.36191100 |
| H | -0.39000800 | -4.77206000 | 1.14581500  |
| H | -2.97321100 | -2.29497400 | 0.26587400  |
| H | -3.17566200 | -4.05960100 | 0.26073400  |
| H | -2.25758500 | -3.27048400 | 1.55634100  |
| H | -2.77874600 | -3.24147200 | -3.45863500 |
| H | -2.93821700 | -4.55471900 | -2.27659900 |
| H | -3.52780200 | -2.92519500 | -1.88819300 |
| H | 0.72141200  | -3.58507700 | -2.31762800 |
| H | -0.40759100 | -4.89229800 | -2.73500600 |
| H | -0.34159700 | -3.41196900 | -3.71981300 |
| C | 2.61880400  | -1.71336700 | 0.12392100  |
| C | 3.14794100  | -2.39630900 | 1.22691500  |
| C | 2.71512000  | -2.29687500 | -1.14779700 |
| C | 3.76755900  | -3.63647000 | 1.06865000  |
| H | 3.06114800  | -1.95903400 | 2.21894600  |
| C | 3.33597100  | -3.53600100 | -1.30444000 |
| H | 2.28859800  | -1.78904800 | -2.00731800 |
| C | 3.86171100  | -4.20984200 | -0.19941600 |
| H | 4.16778500  | -4.15674200 | 1.93474700  |

|                           |             |             |             |
|---------------------------|-------------|-------------|-------------|
| H                         | 3.40298800  | -3.98003200 | -2.29424300 |
| H                         | 4.33939300  | -5.17752200 | -0.32679900 |
| C                         | 3.08981200  | 1.10249500  | -0.11874200 |
| C                         | 3.19793500  | 2.32404000  | 0.56085300  |
| C                         | 3.94912200  | 0.86415500  | -1.20216400 |
| C                         | 4.10208400  | 3.30245400  | 0.14847500  |
| H                         | 2.57454500  | 2.50673100  | 1.42830400  |
| C                         | 4.86063000  | 1.83710200  | -1.61176200 |
| H                         | 3.90286400  | -0.07977600 | -1.73126800 |
| C                         | 4.93343500  | 3.06260200  | -0.94586000 |
| H                         | 4.16392100  | 4.24344600  | 0.68867200  |
| H                         | 5.51678000  | 1.63580100  | -2.45436300 |
| H                         | 5.64348400  | 3.81874600  | -1.26935000 |
| C                         | -2.85313500 | 3.24090200  | -2.17077900 |
| C                         | -3.94370900 | 2.53119100  | -2.67525700 |
| C                         | -4.02570000 | 1.15902000  | -2.44155500 |
| C                         | -3.03733500 | 0.51159000  | -1.69894000 |
| C                         | -1.93911500 | 1.20601000  | -1.16341900 |
| C                         | -1.86722100 | 2.58494800  | -1.43421900 |
| H                         | -2.76841200 | 4.31021700  | -2.34818400 |
| H                         | -4.71506900 | 3.04033200  | -3.24694100 |
| H                         | -4.86151600 | 0.58618900  | -2.83514700 |
| H                         | -3.09909800 | -0.55535800 | -1.54138600 |
| H                         | -1.02525200 | 3.14837700  | -1.06095200 |
| C                         | -0.96248300 | 0.48915900  | -0.25331200 |
| C                         | 0.43613400  | 0.02166600  | -0.80481300 |
| C                         | 0.93590900  | 0.64571300  | -2.06634100 |
| O                         | 1.43558300  | 0.04672800  | -3.00119600 |
| O                         | 0.87095200  | 1.99794500  | -2.03440700 |
| C                         | 1.40810700  | 2.67269700  | -3.17775400 |
| H                         | 0.92110800  | 2.32441500  | -4.09163000 |
| H                         | 1.20407600  | 3.73158200  | -3.01344100 |
| H                         | 2.48420200  | 2.49609900  | -3.24756500 |
| <b>TS<sub>4S/5R</sub></b> |             |             |             |
| P                         | 1.32253700  | 0.65549400  | 1.56995000  |
| C                         | 0.42867000  | 1.92226900  | 2.59395000  |
| C                         | 0.30132300  | 3.28994000  | 1.92166200  |
| H                         | -0.56294100 | 1.51542200  | 2.81001200  |
| H                         | 0.96940300  | 1.99900700  | 3.54734900  |
| C                         | -0.43912000 | 4.31317400  | 2.78917200  |
| H                         | -0.22929000 | 3.16637700  | 0.97032500  |
| H                         | 1.29444400  | 3.68418000  | 1.67172000  |
| C                         | -0.70461700 | 5.62100100  | 2.04007300  |
| H                         | 0.14319000  | 4.51128200  | 3.69945500  |

|   |             |             |             |
|---|-------------|-------------|-------------|
| H | -1.39183700 | 3.88381400  | 3.12881000  |
| H | -1.22411300 | 6.34854000  | 2.67325300  |
| H | -1.32332300 | 5.44085400  | 1.15298800  |
| H | 0.23268200  | 6.07963000  | 1.70256300  |
| C | 1.24899900  | -0.85844000 | 2.63049800  |
| C | -0.09861200 | -1.45667300 | 3.03515000  |
| H | 1.83724800  | -1.60955800 | 2.10168800  |
| H | 1.81563900  | -0.57603000 | 3.52951500  |
| C | 0.07687900  | -2.69331100 | 3.92316800  |
| H | -0.63738700 | -1.75215800 | 2.13688300  |
| H | -0.71145200 | -0.71234600 | 3.55797300  |
| C | -1.26431700 | -3.35260500 | 4.25415700  |
| H | 0.60380900  | -2.42435800 | 4.85001300  |
| H | 0.71883800  | -3.41773900 | 3.40285000  |
| H | -1.13268500 | -4.24338700 | 4.87847400  |
| H | -1.78401800 | -3.65288600 | 3.33693100  |
| H | -1.92092300 | -2.65947000 | 4.79476700  |
| C | 3.09272400  | 1.13691400  | 1.73917600  |
| C | 4.09010100  | 0.04548400  | 1.31986700  |
| H | 3.24157900  | 2.03304300  | 1.13146500  |
| H | 3.24890500  | 1.42422200  | 2.78585800  |
| C | 5.47162500  | 0.61874000  | 0.99293100  |
| H | 3.71349700  | -0.47513400 | 0.43563600  |
| H | 4.17495300  | -0.70588100 | 2.11511900  |
| C | 6.45267800  | -0.46250500 | 0.53623600  |
| H | 5.87297600  | 1.14501300  | 1.87041300  |
| H | 5.35783400  | 1.36825600  | 0.19934700  |
| H | 6.08179200  | -0.96371600 | -0.36592200 |
| H | 6.59123100  | -1.22807400 | 1.30942200  |
| H | 7.43589000  | -0.03926700 | 0.30344100  |
| P | -1.84605400 | 0.15409300  | 0.54620200  |
| B | 0.35170900  | -1.18115200 | -0.83385600 |
| O | 0.96742400  | -1.61877500 | -2.01963200 |
| O | 0.18000000  | -2.25966600 | 0.05761300  |
| C | 1.04631300  | -3.05315900 | -1.99196600 |
| C | 0.89844800  | -3.39420600 | -0.45760800 |
| C | 2.37650500  | -3.47269100 | -2.61752200 |
| C | -0.10586000 | -3.59253000 | -2.84693800 |
| C | 0.06918700  | -4.63944400 | -0.14991700 |
| C | 2.25028500  | -3.48167000 | 0.26119800  |
| H | 2.50093500  | -4.56128400 | -2.58870600 |
| H | 3.22793600  | -3.01220700 | -2.11056700 |
| H | 2.39705900  | -3.15563800 | -3.66485300 |
| H | -1.07133300 | -3.32518600 | -2.41658100 |

|   |             |             |             |
|---|-------------|-------------|-------------|
| H | -0.05856800 | -4.68201700 | -2.95205700 |
| H | -0.04206200 | -3.14031600 | -3.84089100 |
| H | 0.01423600  | -4.77978700 | 0.93511000  |
| H | 0.52116300  | -5.53708400 | -0.58714000 |
| H | -0.95096400 | -4.53366400 | -0.52326200 |
| H | 2.83750400  | -2.57135600 | 0.10991200  |
| H | 2.84097500  | -4.33578300 | -0.08511900 |
| H | 2.08034300  | -3.60700300 | 1.33511300  |
| C | -2.77836000 | -1.38303200 | 0.15237700  |
| C | -3.40104900 | -2.02874500 | 1.22936300  |
| C | -2.88815200 | -1.94110900 | -1.12937100 |
| C | -4.11774900 | -3.21058900 | 1.03680100  |
| H | -3.31129900 | -1.60986800 | 2.22831900  |
| C | -3.60917600 | -3.11994900 | -1.32140900 |
| H | -2.40040000 | -1.45712800 | -1.96988800 |
| C | -4.22124200 | -3.76021300 | -0.24120000 |
| H | -4.58855600 | -3.70240100 | 1.88383600  |
| H | -3.68790400 | -3.54341200 | -2.31934900 |
| H | -4.77523700 | -4.68214100 | -0.39576200 |
| C | -3.01052200 | 1.46094600  | -0.05307900 |
| C | -3.02866100 | 2.67385400  | 0.65035500  |
| C | -3.87647400 | 1.31078500  | -1.14703400 |
| C | -3.85321100 | 3.72624000  | 0.25383800  |
| H | -2.39853000 | 2.78843100  | 1.52466400  |
| C | -4.70802200 | 2.35899100  | -1.54109800 |
| H | -3.89855100 | 0.37790100  | -1.69719300 |
| C | -4.69296800 | 3.57226200  | -0.84950100 |
| H | -3.84829600 | 4.65769400  | 0.81373600  |
| H | -5.37103600 | 2.22608000  | -2.39187600 |
| H | -5.34212000 | 4.38615700  | -1.16061500 |
| C | 2.98113800  | 3.32957700  | -1.83076000 |
| C | 3.94574000  | 2.61416200  | -2.54333400 |
| C | 3.91317500  | 1.22103500  | -2.51769300 |
| C | 2.94050000  | 0.55162600  | -1.77201100 |
| C | 1.97103700  | 1.24808400  | -1.03218900 |
| C | 2.00760800  | 2.65365300  | -1.09743600 |
| H | 2.98496300  | 4.41666800  | -1.84659000 |
| H | 4.70734500  | 3.13730300  | -3.11548500 |
| H | 4.64911700  | 0.64730400  | -3.07529300 |
| H | 2.91105400  | -0.52875300 | -1.77332300 |
| H | 1.25723300  | 3.22123700  | -0.56487500 |
| C | 0.99465200  | 0.49850100  | -0.14895800 |
| C | -0.43668800 | 0.15735800  | -0.70576600 |
| C | -0.86662000 | 0.87031400  | -1.94959700 |

|                           |             |             |             |
|---------------------------|-------------|-------------|-------------|
| O                         | -1.40608700 | 0.34934900  | -2.90881600 |
| O                         | -0.68806900 | 2.20856300  | -1.86407200 |
| C                         | -1.14939600 | 2.97030100  | -2.98524200 |
| H                         | -0.67560500 | 2.62080800  | -3.90571900 |
| H                         | -0.86311800 | 4.00126000  | -2.77375400 |
| H                         | -2.23478200 | 2.88469400  | -3.07791900 |
| <b>TS<sub>4S/5S</sub></b> |             |             |             |
| P                         | -1.64569400 | -1.56862600 | 0.62661200  |
| C                         | -1.77991900 | -3.38246600 | 0.27482500  |
| C                         | -2.86677300 | -3.85710400 | -0.70071700 |
| H                         | -0.79059700 | -3.68476100 | -0.08433500 |
| H                         | -1.91853000 | -3.86875000 | 1.24885300  |
| C                         | -2.62804300 | -5.29691000 | -1.16555800 |
| H                         | -2.90345200 | -3.21213700 | -1.58011200 |
| H                         | -3.85172100 | -3.78772400 | -0.22185200 |
| C                         | -3.66976600 | -5.75254000 | -2.18869600 |
| H                         | -2.62472900 | -5.97496600 | -0.30013900 |
| H                         | -1.62790800 | -5.35637000 | -1.61440600 |
| H                         | -3.48778900 | -6.78196500 | -2.51694400 |
| H                         | -3.64389700 | -5.10521100 | -3.07307900 |
| H                         | -4.68318300 | -5.70864900 | -1.77095900 |
| C                         | -0.72261400 | -1.54881900 | 2.22561900  |
| C                         | -1.50265600 | -1.21270700 | 3.49845400  |
| H                         | -0.26342400 | -2.54267900 | 2.30994700  |
| H                         | 0.10317600  | -0.85100800 | 2.09283500  |
| C                         | -0.56162000 | -1.03005500 | 4.69454800  |
| H                         | -2.22851100 | -2.00239600 | 3.72877600  |
| H                         | -2.06567500 | -0.28708700 | 3.34292600  |
| C                         | -1.31031100 | -0.70313800 | 5.98830400  |
| H                         | 0.15050700  | -0.22639300 | 4.46325100  |
| H                         | 0.03804300  | -1.94075500 | 4.83268300  |
| H                         | -2.00824600 | -1.50638100 | 6.25456200  |
| H                         | -1.89335500 | 0.21955300  | 5.88138800  |
| H                         | -0.62044900 | -0.56801800 | 6.82875000  |
| C                         | -3.42179700 | -1.05969900 | 0.80536100  |
| C                         | -4.32062600 | -1.82602600 | 1.78861000  |
| H                         | -3.42151200 | 0.01014500  | 1.01798100  |
| H                         | -3.80471100 | -1.18108400 | -0.21642600 |
| C                         | -5.80553900 | -1.67823300 | 1.43544700  |
| H                         | -4.15404800 | -1.45686700 | 2.80533900  |
| H                         | -4.06821400 | -2.89384100 | 1.80563900  |
| C                         | -6.72389000 | -2.39130000 | 2.43001900  |
| H                         | -5.97336100 | -2.07506400 | 0.42447000  |
| H                         | -6.06160400 | -0.61095400 | 1.39165300  |

|   |             |             |             |
|---|-------------|-------------|-------------|
| H | -7.77796900 | -2.28103100 | 2.15264300  |
| H | -6.59998800 | -1.98632000 | 3.44165500  |
| H | -6.49995500 | -3.46430500 | 2.47345000  |
| P | -0.66764400 | 1.87759700  | -2.07356800 |
| B | 1.13598800  | -0.13441300 | -0.47397500 |
| O | 1.69843200  | -0.25891300 | 0.81348000  |
| O | 2.07216200  | -0.49474700 | -1.45110300 |
| C | 3.10953600  | -0.49554100 | 0.65654700  |
| C | 3.18198500  | -1.13222100 | -0.77638000 |
| C | 3.58165300  | -1.40464100 | 1.78694600  |
| C | 3.80814300  | 0.86713600  | 0.74584500  |
| C | 4.45499000  | -0.82189800 | -1.55467300 |
| C | 2.91823100  | -2.64132500 | -0.76578200 |
| H | 4.63532700  | -1.67718700 | 1.65799100  |
| H | 2.98618500  | -2.31882300 | 1.83944900  |
| H | 3.48194800  | -0.88143800 | 2.74347800  |
| H | 3.53883400  | 1.33331400  | 1.69842600  |
| H | 3.47801400  | 1.53378700  | -0.05522900 |
| H | 4.89849600  | 0.77137000  | 0.70332800  |
| H | 4.58745100  | 0.25399700  | -1.68709000 |
| H | 4.40349100  | -1.28279100 | -2.54639600 |
| H | 5.33481100  | -1.22222100 | -1.03839400 |
| H | 1.99781500  | -2.86765900 | -0.21905700 |
| H | 3.74413600  | -3.19563200 | -0.30863800 |
| H | 2.80018000  | -2.98875500 | -1.79659700 |
| C | -0.36545700 | 1.14499100  | -3.74747300 |
| C | 0.61593600  | 0.21672800  | -4.12149600 |
| C | -1.22036800 | 1.65475000  | -4.73783600 |
| C | 0.72192100  | -0.19644500 | -5.44855700 |
| H | 1.27602500  | -0.20662700 | -3.37611700 |
| C | -1.10069500 | 1.25363100  | -6.06805600 |
| H | -1.99411600 | 2.36530600  | -4.45773600 |
| C | -0.13042900 | 0.31889000  | -6.42631200 |
| H | 1.47488800  | -0.93260800 | -5.71831300 |
| H | -1.77248100 | 1.66166900  | -6.81880300 |
| H | -0.04127300 | -0.00970500 | -7.45845700 |
| C | 0.76833900  | 3.04855000  | -2.00487700 |
| C | 0.49244500  | 4.38856100  | -1.70515700 |
| C | 2.09583700  | 2.67404000  | -2.25505800 |
| C | 1.51725300  | 5.33436700  | -1.64143600 |
| H | -0.53448400 | 4.68851400  | -1.51320700 |
| C | 3.12112400  | 3.61664200  | -2.18897000 |
| H | 2.32946700  | 1.64207400  | -2.48582300 |
| C | 2.83629800  | 4.94890800  | -1.88012700 |

|   |             |             |             |
|---|-------------|-------------|-------------|
| H | 1.28505000  | 6.37031400  | -1.40792600 |
| H | 4.14657100  | 3.31090300  | -2.38216800 |
| H | 3.63729800  | 5.68181100  | -1.83195400 |
| C | -0.78090300 | -3.13744300 | -3.73324400 |
| C | -1.89605600 | -2.68063200 | -4.43718500 |
| C | -2.62811100 | -1.60171400 | -3.93800500 |
| C | -2.25230100 | -0.99889300 | -2.73906500 |
| C | -1.12940000 | -1.43972400 | -2.01543000 |
| C | -0.40034200 | -2.51602700 | -2.54431500 |
| H | -0.19811600 | -3.97030700 | -4.11852600 |
| H | -2.18635800 | -3.15327100 | -5.37134900 |
| H | -3.49054200 | -1.22885000 | -4.48320400 |
| H | -2.82814300 | -0.16286800 | -2.35161200 |
| H | 0.47879700  | -2.85579800 | -2.01098400 |
| C | -0.75641300 | -0.83044100 | -0.69725400 |
| C | -0.21063700 | 0.62788400  | -0.67593700 |
| C | -0.54738200 | 1.39186100  | 0.57577900  |
| O | -1.41841200 | 1.11255500  | 1.38710800  |
| O | 0.25558800  | 2.45613800  | 0.74033300  |
| C | 0.01187600  | 3.26578300  | 1.89454500  |
| H | 0.25061500  | 2.70803300  | 2.80485400  |
| H | -1.03335400 | 3.58267900  | 1.93302500  |
| H | 0.67235700  | 4.12596900  | 1.78478200  |

**TS<sub>4R/10Z</sub>**

|   |              |              |              |
|---|--------------|--------------|--------------|
| P | -0.802476000 | 0.262683000  | -1.473780000 |
| C | -2.068673000 | -0.764110000 | -2.373202000 |
| C | -1.480574000 | -1.565132000 | -3.537651000 |
| H | -2.876797000 | -0.107213000 | -2.720217000 |
| H | -2.495442000 | -1.437577000 | -1.625250000 |
| C | -2.482196000 | -2.551906000 | -4.145096000 |
| H | -1.125097000 | -0.885359000 | -4.323822000 |
| H | -0.606751000 | -2.122541000 | -3.185815000 |
| C | -1.888649000 | -3.337592000 | -5.316915000 |
| H | -2.815572000 | -3.247148000 | -3.361866000 |
| H | -3.380284000 | -2.011571000 | -4.475541000 |
| H | -1.589865000 | -2.664908000 | -6.129976000 |
| H | -0.996200000 | -3.891307000 | -5.003019000 |
| H | -2.607486000 | -4.056589000 | -5.725149000 |
| C | -0.083295000 | 1.341366000  | -2.778202000 |
| C | -1.120896000 | 2.103510000  | -3.612438000 |
| H | 0.547080000  | 0.731378000  | -3.426758000 |
| H | 0.592089000  | 2.035053000  | -2.267293000 |
| C | -0.457926000 | 3.070392000  | -4.600124000 |
| H | -1.747409000 | 1.396143000  | -4.170652000 |

|   |              |              |              |
|---|--------------|--------------|--------------|
| H | -1.800890000 | 2.669326000  | -2.963058000 |
| C | -1.475631000 | 3.831025000  | -5.452702000 |
| H | 0.165520000  | 3.782205000  | -4.042369000 |
| H | 0.226558000  | 2.508761000  | -5.250185000 |
| H | -0.980447000 | 4.514988000  | -6.150325000 |
| H | -2.091804000 | 3.140665000  | -6.041481000 |
| H | -2.151133000 | 4.424678000  | -4.824881000 |
| C | -1.847342000 | 1.404103000  | -0.456960000 |
| C | -1.132959000 | 2.705321000  | -0.079354000 |
| H | -2.115830000 | 0.871436000  | 0.456715000  |
| H | -2.776309000 | 1.593434000  | -1.005875000 |
| C | -1.889888000 | 3.502061000  | 0.990344000  |
| H | -0.139165000 | 2.450863000  | 0.297260000  |
| H | -0.993439000 | 3.333202000  | -0.968930000 |
| C | -3.267626000 | 3.995750000  | 0.539673000  |
| H | -1.984152000 | 2.873705000  | 1.882840000  |
| H | -1.276492000 | 4.365961000  | 1.280900000  |
| H | -3.945559000 | 3.162326000  | 0.321752000  |
| H | -3.741641000 | 4.608502000  | 1.314442000  |
| H | -3.191792000 | 4.606937000  | -0.368863000 |
| P | 1.529467000  | -2.488092000 | 1.146880000  |
| B | 0.053679000  | -0.340439000 | 2.637333000  |
| O | -0.347263000 | 1.010922000  | 2.702511000  |
| O | 1.189215000  | -0.565182000 | 3.420863000  |
| C | 0.639628000  | 1.723684000  | 3.481766000  |
| C | 1.332687000  | 0.567701000  | 4.298374000  |
| C | 1.600629000  | 2.437858000  | 2.527230000  |
| C | -0.079801000 | 2.754315000  | 4.349472000  |
| C | 0.589989000  | 0.225081000  | 5.596472000  |
| C | 2.816456000  | 0.775105000  | 4.579039000  |
| H | 1.039843000  | 3.151540000  | 1.917960000  |
| H | 2.369361000  | 2.993417000  | 3.073776000  |
| H | 2.090914000  | 1.731309000  | 1.855070000  |
| H | -0.881355000 | 2.293625000  | 4.930165000  |
| H | 0.621123000  | 3.237151000  | 5.040091000  |
| H | -0.520214000 | 3.531213000  | 3.717433000  |
| H | 0.706120000  | 1.006549000  | 6.354764000  |
| H | -0.477186000 | 0.074011000  | 5.408485000  |
| H | 0.994827000  | -0.710189000 | 5.994301000  |
| H | 3.206876000  | -0.082971000 | 5.135547000  |
| H | 3.385925000  | 0.861824000  | 3.651371000  |
| H | 2.981038000  | 1.675137000  | 5.182397000  |
| C | 1.305467000  | -3.531759000 | -0.370392000 |
| C | 0.093623000  | -3.725804000 | -1.048198000 |



|                            |              |              |              |
|----------------------------|--------------|--------------|--------------|
| C                          | 2.455972000  | -4.158609000 | -0.864666000 |
| C                          | 0.029811000  | -4.554369000 | -2.167896000 |
| H                          | -0.802579000 | -3.220950000 | -0.704217000 |
| C                          | 2.398531000  | -4.979416000 | -1.992531000 |
| H                          | 3.408041000  | -3.983599000 | -0.370632000 |
| C                          | 1.183185000  | -5.182345000 | -2.645176000 |
| H                          | -0.920645000 | -4.709357000 | -2.671443000 |
| H                          | 3.303480000  | -5.452611000 | -2.363945000 |
| H                          | 1.132520000  | -5.821610000 | -3.522619000 |
| C                          | 0.713459000  | -3.586318000 | 2.405931000  |
| C                          | 1.251591000  | -3.557838000 | 3.700307000  |
| C                          | -0.344344000 | -4.468887000 | 2.143276000  |
| C                          | 0.733600000  | -4.369485000 | 4.709872000  |
| H                          | 2.064323000  | -2.874310000 | 3.916527000  |
| C                          | -0.864737000 | -5.279781000 | 3.150350000  |
| H                          | -0.759754000 | -4.535741000 | 1.144224000  |
| C                          | -0.329291000 | -5.230276000 | 4.439099000  |
| H                          | 1.161725000  | -4.328870000 | 5.708118000  |
| H                          | -1.684429000 | -5.958178000 | 2.926838000  |
| H                          | -0.733531000 | -5.864985000 | 5.223317000  |
| C                          | 3.440265000  | -0.925474000 | -2.914185000 |
| C                          | 4.489215000  | -0.494199000 | -2.101264000 |
| C                          | 4.208262000  | -0.090076000 | -0.794300000 |
| C                          | 2.898676000  | -0.088548000 | -0.321508000 |
| C                          | 1.817789000  | -0.509311000 | -1.125769000 |
| C                          | 2.135717000  | -0.954386000 | -2.425159000 |
| H                          | 3.640915000  | -1.277864000 | -3.923063000 |
| H                          | 5.509804000  | -0.487237000 | -2.473819000 |
| H                          | 5.012561000  | 0.237556000  | -0.140268000 |
| H                          | 2.694987000  | 0.226837000  | 0.695053000  |
| H                          | 1.349584000  | -1.372453000 | -3.044888000 |
| C                          | 0.440474000  | -0.521901000 | -0.577927000 |
| C                          | 0.215797000  | -1.130002000 | 0.758147000  |
| C                          | -1.036384000 | -1.408439000 | 1.326761000  |
| O                          | -1.060243000 | -1.326841000 | 2.651780000  |
| O                          | -2.207919000 | -1.515746000 | 0.681624000  |
| C                          | -3.405323000 | -1.449687000 | 1.480665000  |
| H                          | -4.228995000 | -1.428261000 | 0.766286000  |
| H                          | -3.476569000 | -2.330951000 | 2.121593000  |
| H                          | -3.400330000 | -0.548661000 | 2.098294000  |
| <b>TS<sub>4S/10Z</sub></b> |              |              |              |
| P                          | -0.454385000 | -1.240870000 | -1.311213000 |
| C                          | -1.961563000 | -1.906275000 | -2.130875000 |
| C                          | -2.436243000 | -3.235326000 | -1.527951000 |

|   |              |              |              |
|---|--------------|--------------|--------------|
| H | -1.741265000 | -2.023718000 | -3.197154000 |
| H | -2.740831000 | -1.147808000 | -2.046985000 |
| C | -3.821152000 | -3.660158000 | -2.038631000 |
| H | -1.704858000 | -4.019174000 | -1.762765000 |
| H | -2.466326000 | -3.145513000 | -0.437283000 |
| C | -4.953875000 | -2.745627000 | -1.561827000 |
| H | -3.811582000 | -3.705504000 | -3.137379000 |
| H | -4.016168000 | -4.683777000 | -1.692549000 |
| H | -5.927794000 | -3.122769000 | -1.893814000 |
| H | -4.966354000 | -2.674252000 | -0.469124000 |
| H | -4.847835000 | -1.725215000 | -1.944127000 |
| C | 0.824254000  | -2.533109000 | -1.594453000 |
| C | 1.133701000  | -2.850765000 | -3.062008000 |
| H | 0.475043000  | -3.427761000 | -1.070065000 |
| H | 1.722962000  | -2.172905000 | -1.094485000 |
| C | 2.228209000  | -3.919915000 | -3.208330000 |
| H | 0.226595000  | -3.196346000 | -3.573049000 |
| H | 1.459059000  | -1.939935000 | -3.580475000 |
| C | 3.606017000  | -3.461338000 | -2.721614000 |
| H | 1.923897000  | -4.823572000 | -2.661993000 |
| H | 2.298918000  | -4.209651000 | -4.264743000 |
| H | 4.358976000  | -4.242861000 | -2.870587000 |
| H | 3.935568000  | -2.570099000 | -3.269595000 |
| H | 3.598679000  | -3.204087000 | -1.657137000 |
| C | 0.093866000  | 0.213171000  | -2.350111000 |
| C | -0.457025000 | 0.344246000  | -3.773723000 |
| H | 1.186414000  | 0.178026000  | -2.351696000 |
| H | -0.182226000 | 1.093203000  | -1.758060000 |
| C | 0.110645000  | 1.573504000  | -4.493870000 |
| H | -0.223188000 | -0.552844000 | -4.361363000 |
| H | -1.552154000 | 0.417565000  | -3.747846000 |
| C | -0.439441000 | 1.738433000  | -5.912182000 |
| H | -0.112896000 | 2.471206000  | -3.901258000 |
| H | 1.206370000  | 1.495256000  | -4.527498000 |
| H | -0.017176000 | 2.620628000  | -6.405687000 |
| H | -0.203543000 | 0.863962000  | -6.530800000 |
| H | -1.530205000 | 1.851443000  | -5.900998000 |
| P | 0.155677000  | 0.279965000  | 2.913252000  |
| B | 2.197244000  | -0.200682000 | 1.012891000  |
| O | 2.557933000  | -0.386371000 | -0.357469000 |
| O | 2.725170000  | 1.013108000  | 1.470217000  |
| C | 3.772526000  | 0.376909000  | -0.537823000 |
| C | 3.521219000  | 1.597935000  | 0.416018000  |
| C | 4.953367000  | -0.495867000 | -0.089947000 |

|   |              |              |              |
|---|--------------|--------------|--------------|
| C | 3.929414000  | 0.727344000  | -2.013227000 |
| C | 2.713696000  | 2.711910000  | -0.257283000 |
| C | 4.780021000  | 2.185161000  | 1.049032000  |
| H | 4.871737000  | -0.763193000 | 0.966758000  |
| H | 4.952839000  | -1.419790000 | -0.676735000 |
| H | 5.910953000  | 0.010302000  | -0.248615000 |
| H | 4.824366000  | 1.339635000  | -2.169509000 |
| H | 4.041519000  | -0.190383000 | -2.600156000 |
| H | 3.067456000  | 1.275433000  | -2.397697000 |
| H | 2.379222000  | 3.420218000  | 0.505969000  |
| H | 3.318242000  | 3.257122000  | -0.989972000 |
| H | 1.832673000  | 2.310890000  | -0.765989000 |
| H | 5.307882000  | 1.439736000  | 1.646996000  |
| H | 5.461368000  | 2.573028000  | 0.282637000  |
| H | 4.503327000  | 3.012166000  | 1.710215000  |
| C | -1.003001000 | 1.578475000  | 2.316804000  |
| C | -0.511687000 | 2.406728000  | 1.296084000  |
| C | -2.281582000 | 1.828828000  | 2.827625000  |
| C | -1.284844000 | 3.445753000  | 0.784746000  |
| H | 0.481459000  | 2.225678000  | 0.909320000  |
| C | -3.047299000 | 2.881946000  | 2.329218000  |
| H | -2.704148000 | 1.176936000  | 3.581892000  |
| C | -2.557711000 | 3.691454000  | 1.304196000  |
| H | -0.888499000 | 4.070056000  | -0.012690000 |
| H | -4.043993000 | 3.050755000  | 2.727414000  |
| H | -3.162448000 | 4.504905000  | 0.912336000  |
| C | -0.819519000 | -0.705731000 | 4.133491000  |
| C | -1.296781000 | -0.035132000 | 5.274629000  |
| C | -0.909902000 | -2.105555000 | 4.112946000  |
| C | -1.903420000 | -0.730341000 | 6.319115000  |
| H | -1.189217000 | 1.043571000  | 5.349319000  |
| C | -1.503677000 | -2.803608000 | 5.164418000  |
| H | -0.530058000 | -2.662763000 | 3.264496000  |
| C | -2.015394000 | -2.120507000 | 6.267841000  |
| H | -2.279912000 | -0.183779000 | 7.179841000  |
| H | -1.570876000 | -3.887599000 | 5.115814000  |
| H | -2.482660000 | -2.664761000 | 7.083704000  |
| C | -4.251624000 | -1.055741000 | 1.936940000  |
| C | -4.945453000 | -0.092108000 | 1.202625000  |
| C | -4.275172000 | 0.595435000  | 0.189021000  |
| C | -2.930280000 | 0.340278000  | -0.062886000 |
| C | -2.206360000 | -0.632588000 | 0.658717000  |
| C | -2.916446000 | -1.334852000 | 1.651063000  |
| H | -4.754821000 | -1.609657000 | 2.725841000  |

|                           |              |              |              |
|---------------------------|--------------|--------------|--------------|
| H                         | -5.988951000 | 0.121189000  | 1.417246000  |
| H                         | -4.789446000 | 1.366015000  | -0.379664000 |
| H                         | -2.407234000 | 0.948480000  | -0.795145000 |
| H                         | -2.408651000 | -2.115292000 | 2.200648000  |
| C                         | -0.784798000 | -0.935412000 | 0.359889000  |
| C                         | 0.313888000  | -0.787537000 | 1.345806000  |
| C                         | 1.222146000  | -1.850097000 | 1.635953000  |
| O                         | 2.445993000  | -1.428027000 | 1.872151000  |
| O                         | 1.000747000  | -3.145695000 | 1.466358000  |
| C                         | 2.151915000  | -4.011876000 | 1.452053000  |
| H                         | 1.772024000  | -4.990215000 | 1.158005000  |
| H                         | 2.888434000  | -3.647669000 | 0.732421000  |
| H                         | 2.603571000  | -4.059732000 | 2.445367000  |
| <b>TS<sub>SR/TE</sub></b> |              |              |              |
| P                         | 0.561196000  | -1.958269000 | -0.065127000 |
| C                         | -0.116972000 | -3.150826000 | 1.185331000  |
| C                         | -1.300055000 | -3.973328000 | 0.669651000  |
| H                         | -0.437844000 | -2.545718000 | 2.037923000  |
| H                         | 0.685958000  | -3.813134000 | 1.530872000  |
| C                         | -1.854775000 | -4.931116000 | 1.728718000  |
| H                         | -2.096996000 | -3.290413000 | 0.356872000  |
| H                         | -1.007206000 | -4.546928000 | -0.220256000 |
| C                         | -3.081444000 | -5.703208000 | 1.238295000  |
| H                         | -1.067611000 | -5.635181000 | 2.031210000  |
| H                         | -2.115480000 | -4.356624000 | 2.627705000  |
| H                         | -3.463409000 | -6.382170000 | 2.008409000  |
| H                         | -3.893797000 | -5.018429000 | 0.964422000  |
| H                         | -2.843096000 | -6.302471000 | 0.351282000  |
| C                         | 2.046813000  | -1.200323000 | 0.728120000  |
| C                         | 2.582537000  | -1.823808000 | 2.019048000  |
| H                         | 1.789028000  | -0.153058000 | 0.918269000  |
| H                         | 2.816003000  | -1.176201000 | -0.049987000 |
| C                         | 3.897152000  | -1.159925000 | 2.446292000  |
| H                         | 1.841435000  | -1.705799000 | 2.819536000  |
| H                         | 2.745754000  | -2.903162000 | 1.900162000  |
| C                         | 4.364298000  | -1.610363000 | 3.830836000  |
| H                         | 4.669910000  | -1.385374000 | 1.698089000  |
| H                         | 3.767038000  | -0.071804000 | 2.441381000  |
| H                         | 3.627837000  | -1.336300000 | 4.595966000  |
| H                         | 4.499870000  | -2.698202000 | 3.874019000  |
| H                         | 5.317481000  | -1.143477000 | 4.103148000  |
| C                         | 1.240849000  | -2.997616000 | -1.430484000 |
| C                         | 2.247307000  | -4.076580000 | -1.018633000 |
| H                         | 1.690800000  | -2.271340000 | -2.115961000 |

|   |              |              |              |
|---|--------------|--------------|--------------|
| H | 0.395501000  | -3.441881000 | -1.966935000 |
| C | 2.809688000  | -4.834165000 | -2.227149000 |
| H | 3.077287000  | -3.622498000 | -0.461322000 |
| H | 1.772804000  | -4.794328000 | -0.335616000 |
| C | 3.808638000  | -5.923616000 | -1.830926000 |
| H | 1.978487000  | -5.279697000 | -2.790932000 |
| H | 3.290166000  | -4.117667000 | -2.906539000 |
| H | 4.197911000  | -6.449169000 | -2.709882000 |
| H | 4.662977000  | -5.497741000 | -1.290819000 |
| H | 3.341474000  | -6.669039000 | -1.175493000 |
| P | -0.400962000 | 2.145226000  | 0.562554000  |
| B | -1.971326000 | -0.136599000 | -0.022364000 |
| O | -3.175255000 | 0.325186000  | -0.477696000 |
| O | -2.060935000 | -0.752793000 | 1.208376000  |
| C | -4.205497000 | -0.111548000 | 0.446865000  |
| C | -3.385710000 | -0.464938000 | 1.745562000  |
| C | -5.210357000 | 1.022358000  | 0.613217000  |
| C | -4.879432000 | -1.325186000 | -0.200984000 |
| C | -3.873146000 | -1.697844000 | 2.499095000  |
| C | -3.235644000 | 0.711992000  | 2.711486000  |
| H | -5.705436000 | 1.212620000  | -0.343693000 |
| H | -5.978175000 | 0.759074000  | 1.349284000  |
| H | -4.719150000 | 1.944447000  | 0.929120000  |
| H | -5.721248000 | -1.687246000 | 0.398021000  |
| H | -5.250994000 | -1.035376000 | -1.187800000 |
| H | -4.171777000 | -2.147600000 | -0.341426000 |
| H | -4.883054000 | -1.535018000 | 2.891206000  |
| H | -3.885457000 | -2.587955000 | 1.867628000  |
| H | -3.209213000 | -1.892127000 | 3.347359000  |
| H | -2.823609000 | 1.584652000  | 2.200764000  |
| H | -4.194576000 | 0.974566000  | 3.169045000  |
| H | -2.541846000 | 0.431252000  | 3.510133000  |
| C | 0.901116000  | 2.157269000  | 1.875430000  |
| C | 2.054516000  | 2.955194000  | 1.874248000  |
| C | 0.701257000  | 1.267034000  | 2.944086000  |
| C | 2.978183000  | 2.866612000  | 2.916354000  |
| H | 2.221940000  | 3.645516000  | 1.055988000  |
| C | 1.627633000  | 1.172660000  | 3.982387000  |
| H | -0.185562000 | 0.638419000  | 2.947463000  |
| C | 2.768198000  | 1.977588000  | 3.973256000  |
| H | 3.866882000  | 3.492549000  | 2.903032000  |
| H | 1.456845000  | 0.478331000  | 4.801048000  |
| H | 3.489642000  | 1.911410000  | 4.783101000  |
| C | -0.308890000 | 3.824729000  | -0.173316000 |

|   |              |              |              |
|---|--------------|--------------|--------------|
| C | -0.462396000 | 4.004850000  | -1.555209000 |
| C | -0.230336000 | 4.961047000  | 0.646209000  |
| C | -0.517977000 | 5.284370000  | -2.104241000 |
| H | -0.532901000 | 3.132284000  | -2.196969000 |
| C | -0.276929000 | 6.241546000  | 0.095388000  |
| H | -0.121619000 | 4.845010000  | 1.721136000  |
| C | -0.419958000 | 6.409032000  | -1.282756000 |
| H | -0.631426000 | 5.403618000  | -3.178778000 |
| H | -0.203003000 | 7.109662000  | 0.745440000  |
| H | -0.457562000 | 7.406444000  | -1.712204000 |
| C | -0.923268000 | -0.476252000 | -4.736783000 |
| C | -1.656319000 | -1.655624000 | -4.863909000 |
| C | -2.049171000 | -2.340694000 | -3.712666000 |
| C | -1.697194000 | -1.850027000 | -2.459013000 |
| C | -0.943052000 | -0.674806000 | -2.313463000 |
| C | -0.576600000 | 0.011708000  | -3.477453000 |
| H | -0.619180000 | 0.073435000  | -5.623412000 |
| H | -1.925132000 | -2.033292000 | -5.846448000 |
| H | -2.632823000 | -3.254217000 | -3.789932000 |
| H | -2.005158000 | -2.395860000 | -1.572225000 |
| H | -0.020020000 | 0.935828000  | -3.397016000 |
| C | -0.670274000 | -0.115953000 | -0.938994000 |
| C | 0.171076000  | 1.015168000  | -0.730280000 |
| C | 1.471878000  | 1.076887000  | -1.352035000 |
| O | 2.013111000  | 0.169531000  | -1.989285000 |
| O | 2.129135000  | 2.253305000  | -1.121349000 |
| C | 3.470704000  | 2.309493000  | -1.601797000 |
| H | 4.096618000  | 1.566249000  | -1.097572000 |
| H | 3.510785000  | 2.126942000  | -2.679173000 |
| H | 3.821949000  | 3.316867000  | -1.372337000 |

**TS<sub>SS/7E</sub>**

|   |              |              |              |
|---|--------------|--------------|--------------|
| P | 0.310750000  | -1.959188000 | -0.019047000 |
| C | -0.785362000 | -3.209311000 | -0.851155000 |
| C | -0.178576000 | -4.554963000 | -1.265566000 |
| H | -1.627204000 | -3.391607000 | -0.172725000 |
| H | -1.197738000 | -2.688939000 | -1.720692000 |
| C | -1.180666000 | -5.414432000 | -2.046874000 |
| H | 0.149882000  | -5.106337000 | -0.376364000 |
| H | 0.714938000  | -4.398992000 | -1.883488000 |
| C | -0.601947000 | -6.769151000 | -2.460999000 |
| H | -1.508658000 | -4.862110000 | -2.938382000 |
| H | -2.079749000 | -5.567118000 | -1.433574000 |
| H | -1.333737000 | -7.364274000 | -3.018153000 |
| H | -0.295121000 | -7.351389000 | -1.583817000 |

|   |              |              |              |
|---|--------------|--------------|--------------|
| H | 0.280994000  | -6.641430000 | -3.098813000 |
| C | 1.563937000  | -1.596280000 | -1.334340000 |
| C | 2.717108000  | -0.662044000 | -0.944205000 |
| H | 1.964976000  | -2.559892000 | -1.674742000 |
| H | 0.999802000  | -1.171545000 | -2.172927000 |
| C | 3.864219000  | -0.714510000 | -1.955815000 |
| H | 3.092425000  | -0.910287000 | 0.052606000  |
| H | 2.345189000  | 0.362347000  | -0.879646000 |
| C | 5.001479000  | 0.237664000  | -1.581150000 |
| H | 3.482726000  | -0.455186000 | -2.951876000 |
| H | 4.245857000  | -1.744060000 | -2.024112000 |
| H | 5.413660000  | -0.012737000 | -0.595533000 |
| H | 4.640517000  | 1.270964000  | -1.544081000 |
| H | 5.821047000  | 0.192498000  | -2.307567000 |
| C | 1.162087000  | -2.867864000 | 1.350395000  |
| C | 2.402043000  | -3.698891000 | 0.993032000  |
| H | 1.429696000  | -2.091400000 | 2.071780000  |
| H | 0.397053000  | -3.495629000 | 1.823880000  |
| C | 3.015276000  | -4.357295000 | 2.234319000  |
| H | 3.156456000  | -3.055264000 | 0.525781000  |
| H | 2.158818000  | -4.473569000 | 0.256334000  |
| C | 4.271702000  | -5.168813000 | 1.910848000  |
| H | 2.265829000  | -5.006250000 | 2.708505000  |
| H | 3.254681000  | -3.577519000 | 2.969312000  |
| H | 4.696901000  | -5.625473000 | 2.811453000  |
| H | 5.044654000  | -4.533865000 | 1.461066000  |
| H | 4.050735000  | -5.974649000 | 1.200007000  |
| P | -0.429080000 | 2.372669000  | -0.335634000 |
| B | -1.973797000 | 0.031571000  | -0.170811000 |
| O | -1.859512000 | -0.357617000 | -1.493041000 |
| O | -3.263627000 | 0.308660000  | 0.188776000  |
| C | -3.132524000 | -0.076423000 | -2.145023000 |
| C | -4.128996000 | -0.037911000 | -0.925095000 |
| C | -3.399678000 | -1.183904000 | -3.159758000 |
| C | -3.001164000 | 1.267225000  | -2.864839000 |
| C | -5.226173000 | 1.014789000  | -1.024790000 |
| C | -4.735090000 | -1.404812000 | -0.591270000 |
| H | -2.628477000 | -1.158275000 | -3.936118000 |
| H | -4.371328000 | -1.038143000 | -3.644345000 |
| H | -3.386473000 | -2.174279000 | -2.699790000 |
| H | -3.925467000 | 1.520828000  | -3.393384000 |
| H | -2.193851000 | 1.202916000  | -3.600560000 |
| H | -2.750546000 | 2.067192000  | -2.165695000 |
| H | -5.868890000 | 0.826212000  | -1.891811000 |

|   |              |              |              |
|---|--------------|--------------|--------------|
| H | -4.805321000 | 2.018352000  | -1.108249000 |
| H | -5.847433000 | 0.980857000  | -0.124691000 |
| H | -3.963852000 | -2.179051000 | -0.534082000 |
| H | -5.476222000 | -1.710365000 | -1.336782000 |
| H | -5.225481000 | -1.343522000 | 0.384305000  |
| C | 0.941899000  | 2.599420000  | -1.554328000 |
| C | 2.025146000  | 3.476247000  | -1.401609000 |
| C | 0.886138000  | 1.794779000  | -2.703741000 |
| C | 3.026840000  | 3.540713000  | -2.370299000 |
| H | 2.081938000  | 4.103056000  | -0.519569000 |
| C | 1.892419000  | 1.851077000  | -3.668206000 |
| H | 0.051335000  | 1.110277000  | -2.825472000 |
| C | 2.966703000  | 2.726968000  | -3.504085000 |
| H | 3.861412000  | 4.224672000  | -2.237667000 |
| H | 1.834016000  | 1.218930000  | -4.550654000 |
| H | 3.750847000  | 2.777006000  | -4.254558000 |
| C | -0.410907000 | 3.934980000  | 0.630769000  |
| C | -0.529221000 | 3.928583000  | 2.027015000  |
| C | -0.417187000 | 5.169864000  | -0.036835000 |
| C | -0.632708000 | 5.123349000  | 2.737784000  |
| H | -0.536647000 | 2.979206000  | 2.552572000  |
| C | -0.510240000 | 6.365169000  | 0.674772000  |
| H | -0.337592000 | 5.197024000  | -1.120513000 |
| C | -0.617811000 | 6.347052000  | 2.066520000  |
| H | -0.718650000 | 5.098207000  | 3.821167000  |
| H | -0.501844000 | 7.311865000  | 0.140563000  |
| H | -0.692963000 | 7.277996000  | 2.621852000  |
| C | -1.045542000 | -0.821141000 | 4.621946000  |
| C | -1.928529000 | -1.900211000 | 4.626038000  |
| C | -2.439437000 | -2.364458000 | 3.412912000  |
| C | -2.054184000 | -1.760426000 | 2.220055000  |
| C | -1.142751000 | -0.690366000 | 2.193842000  |
| C | -0.661948000 | -0.220533000 | 3.423474000  |
| H | -0.649396000 | -0.438903000 | 5.558788000  |
| H | -2.224228000 | -2.366387000 | 5.561693000  |
| H | -3.146855000 | -3.189216000 | 3.394939000  |
| H | -2.481217000 | -2.118590000 | 1.290309000  |
| H | 0.022162000  | 0.615400000  | 3.446108000  |
| C | -0.779339000 | -0.041561000 | 0.882274000  |
| C | 0.106689000  | 1.077747000  | 0.805679000  |
| C | 1.397345000  | 1.060873000  | 1.443427000  |
| O | 1.934566000  | 0.092257000  | 1.989320000  |
| O | 2.065214000  | 2.249669000  | 1.337735000  |
| C | 3.409738000  | 2.245374000  | 1.812941000  |



|                           |                 |                 |                 |
|---------------------------|-----------------|-----------------|-----------------|
| H                         | 4.031179000     | 1.570132000     | 1.216690000     |
| H                         | 3.455843000     | 1.933842000     | 2.859990000     |
| H                         | 3.761094000     | 3.272815000     | 1.704293000     |
| <b>TS<sub>SR/GR</sub></b> |                 |                 |                 |
| P                         | -2.180053000000 | -1.458132000000 | -0.368408000000 |
| C                         | -3.853170000000 | -0.705854000000 | -0.186132000000 |
| C                         | -3.961705000000 | 0.824736000000  | -0.246544000000 |
| H                         | -4.254091000000 | -1.076394000000 | 0.763207000000  |
| H                         | -4.463384000000 | -1.159851000000 | -0.976979000000 |
| C                         | -5.422403000000 | 1.282512000000  | -0.274766000000 |
| H                         | -3.450938000000 | 1.264730000000  | 0.612926000000  |
| H                         | -3.440035000000 | 1.211384000000  | -1.126694000000 |
| C                         | -5.540248000000 | 2.808107000000  | -0.294004000000 |
| H                         | -5.926222000000 | 0.856957000000  | -1.155047000000 |
| H                         | -5.948856000000 | 0.881621000000  | 0.603473000000  |
| H                         | -6.587402000000 | 3.130106000000  | -0.308643000000 |
| H                         | -5.060894000000 | 3.246482000000  | 0.588616000000  |
| H                         | -5.044910000000 | 3.227336000000  | -1.177638000000 |
| C                         | -2.401359000000 | -3.215619000000 | 0.159305000000  |
| C                         | -3.608918000000 | -3.942797000000 | -0.446006000000 |
| H                         | -2.467707000000 | -3.240505000000 | 1.248692000000  |
| H                         | -1.464079000000 | -3.714668000000 | -0.113824000000 |
| C                         | -3.635368000000 | -5.423634000000 | -0.048454000000 |
| H                         | -4.536819000000 | -3.465033000000 | -0.107081000000 |
| H                         | -3.605988000000 | -3.867885000000 | -1.541312000000 |
| C                         | -4.847433000000 | -6.165180000000 | -0.616052000000 |
| H                         | -2.709901000000 | -5.904439000000 | -0.393617000000 |
| H                         | -3.630976000000 | -5.501535000000 | 1.047092000000  |
| H                         | -5.784454000000 | -5.721248000000 | -0.258950000000 |
| H                         | -4.857942000000 | -6.124645000000 | -1.711992000000 |
| H                         | -4.843872000000 | -7.219953000000 | -0.320831000000 |
| C                         | -1.830627000000 | -1.643537000000 | -2.180144000000 |
| C                         | -2.536747000000 | -0.664847000000 | -3.119800000000 |
| H                         | -2.100341000000 | -2.676053000000 | -2.435329000000 |
| H                         | -0.751840000000 | -1.548281000000 | -2.280243000000 |
| C                         | -2.083343000000 | -0.866684000000 | -4.569545000000 |
| H                         | -3.627083000000 | -0.785493000000 | -3.062099000000 |
| H                         | -2.287940000000 | 0.351649000000  | -2.809525000000 |
| C                         | -2.767721000000 | 0.104575000000  | -5.533700000000 |
| H                         | -0.994849000000 | -0.729529000000 | -4.618219000000 |
| H                         | -2.280720000000 | -1.902068000000 | -4.882678000000 |
| H                         | -2.423810000000 | -0.042791000000 | -6.563454000000 |
| H                         | -3.856566000000 | -0.027970000000 | -5.522311000000 |
| H                         | -2.557584000000 | 1.143802000000  | -5.254553000000 |

|   |                 |                 |                 |
|---|-----------------|-----------------|-----------------|
| P | -1.098659000000 | 1.930106000000  | 2.364456000000  |
| B | 0.526179000000  | -1.112523000000 | 0.258882000000  |
| O | 1.719851000000  | -0.492687000000 | 0.510640000000  |
| O | 0.668143000000  | -2.234903000000 | -0.529620000000 |
| C | 2.694387000000  | -1.019174000000 | -0.429085000000 |
| C | 2.087953000000  | -2.428281000000 | -0.789183000000 |
| C | 2.727879000000  | -0.043670000000 | -1.609436000000 |
| C | 4.050043000000  | -1.065229000000 | 0.265781000000  |
| C | 2.549617000000  | -3.550957000000 | 0.142731000000  |
| C | 2.253958000000  | -2.844364000000 | -2.245507000000 |
| H | 3.438577000000  | -0.365515000000 | -2.377540000000 |
| H | 1.732856000000  | 0.079500000000  | -2.044276000000 |
| H | 3.043640000000  | 0.936779000000  | -1.239399000000 |
| H | 4.365571000000  | -0.046765000000 | 0.510840000000  |
| H | 4.009757000000  | -1.638365000000 | 1.194566000000  |
| H | 4.808331000000  | -1.508185000000 | -0.389454000000 |
| H | 2.435825000000  | -3.267188000000 | 1.193005000000  |
| H | 1.935680000000  | -4.438522000000 | -0.038270000000 |
| H | 3.597580000000  | -3.813471000000 | -0.032408000000 |
| H | 1.803837000000  | -2.114053000000 | -2.920907000000 |
| H | 3.314209000000  | -2.949078000000 | -2.500489000000 |
| H | 1.767508000000  | -3.811094000000 | -2.410580000000 |
| C | -0.087225000000 | 1.068926000000  | 3.681419000000  |
| C | 1.225422000000  | 0.618720000000  | 3.480270000000  |
| C | -0.661068000000 | 0.907930000000  | 4.946700000000  |
| C | 1.936228000000  | 0.014702000000  | 4.514352000000  |
| H | 1.684904000000  | 0.720618000000  | 2.505866000000  |
| C | 0.048003000000  | 0.301595000000  | 5.986329000000  |
| H | -1.679652000000 | 1.248766000000  | 5.112793000000  |
| C | 1.349735000000  | -0.147915000000 | 5.772270000000  |
| H | 2.952174000000  | -0.331860000000 | 4.338556000000  |
| H | -0.419217000000 | 0.178178000000  | 6.960186000000  |
| H | 1.904836000000  | -0.620471000000 | 6.578729000000  |
| C | 0.136389000000  | 3.280961000000  | 2.016036000000  |
| C | -0.103051000000 | 4.528996000000  | 2.599238000000  |
| C | 1.305995000000  | 3.104991000000  | 1.262062000000  |
| C | 0.804362000000  | 5.580325000000  | 2.442850000000  |
| H | -1.012029000000 | 4.679916000000  | 3.176737000000  |
| C | 2.209955000000  | 4.151814000000  | 1.101049000000  |
| H | 1.494981000000  | 2.146078000000  | 0.790320000000  |
| C | 1.963729000000  | 5.394991000000  | 1.692140000000  |
| H | 0.600479000000  | 6.544008000000  | 2.902948000000  |
| H | 3.111896000000  | 4.000007000000  | 0.512090000000  |
| H | 2.669890000000  | 6.211328000000  | 1.564070000000  |

|                           |                 |                 |                 |
|---------------------------|-----------------|-----------------|-----------------|
| C                         | -0.773829000000 | -2.884078000000 | 4.012754000000  |
| C                         | -1.994036000000 | -2.575869000000 | 4.612969000000  |
| C                         | -2.826228000000 | -1.623030000000 | 4.023826000000  |
| C                         | -2.438708000000 | -0.990688000000 | 2.845801000000  |
| C                         | -1.224576000000 | -1.309345000000 | 2.217333000000  |
| C                         | -0.400855000000 | -2.264958000000 | 2.820194000000  |
| H                         | -0.106077000000 | -3.606026000000 | 4.473919000000  |
| H                         | -2.285991000000 | -3.061356000000 | 5.539681000000  |
| H                         | -3.769075000000 | -1.355674000000 | 4.492808000000  |
| H                         | -3.067231000000 | -0.214839000000 | 2.423802000000  |
| H                         | 0.553234000000  | -2.513124000000 | 2.367559000000  |
| C                         | -0.856156000000 | -0.656905000000 | 0.893008000000  |
| C                         | -0.905562000000 | 0.850443000000  | 0.896734000000  |
| C                         | -0.774003000000 | 1.373574000000  | -0.380939000000 |
| O                         | -0.512263000000 | 0.667586000000  | -1.401918000000 |
| O                         | -1.047840000000 | 2.716138000000  | -0.529939000000 |
| C                         | -0.510128000000 | 3.342408000000  | -1.688107000000 |
| H                         | 0.577132000000  | 3.456236000000  | -1.596356000000 |
| H                         | -0.736271000000 | 2.768656000000  | -2.590683000000 |
| H                         | -0.971696000000 | 4.330789000000  | -1.736939000000 |
| <b>TS<sub>55/65</sub></b> |                 |                 |                 |
| P                         | -2.169434000000 | -0.940167000000 | 0.051189000000  |
| C                         | -3.133807000000 | -0.248907000000 | -1.352566000000 |
| C                         | -3.018113000000 | 1.265276000000  | -1.592946000000 |
| H                         | -2.836374000000 | -0.808519000000 | -2.244651000000 |
| H                         | -4.176190000000 | -0.522888000000 | -1.147872000000 |
| C                         | -4.171590000000 | 1.797087000000  | -2.446613000000 |
| H                         | -2.064364000000 | 1.476811000000  | -2.078924000000 |
| H                         | -2.986771000000 | 1.801772000000  | -0.638585000000 |
| C                         | -4.034813000000 | 3.297123000000  | -2.716512000000 |
| H                         | -5.128431000000 | 1.594308000000  | -1.942694000000 |
| H                         | -4.205100000000 | 1.250490000000  | -3.399728000000 |
| H                         | -4.856527000000 | 3.671010000000  | -3.337276000000 |
| H                         | -3.092173000000 | 3.515610000000  | -3.230777000000 |
| H                         | -4.035260000000 | 3.864450000000  | -1.778067000000 |
| C                         | -2.565944000000 | -2.743831000000 | 0.078445000000  |
| C                         | -4.005664000000 | -3.126178000000 | 0.441035000000  |
| H                         | -2.301933000000 | -3.155893000000 | -0.898988000000 |
| H                         | -1.866002000000 | -3.182413000000 | 0.799329000000  |
| C                         | -4.212876000000 | -4.644939000000 | 0.392416000000  |
| H                         | -4.713476000000 | -2.647155000000 | -0.248242000000 |
| H                         | -4.254731000000 | -2.764695000000 | 1.445673000000  |
| C                         | -5.640182000000 | -5.055802000000 | 0.759960000000  |
| H                         | -3.499543000000 | -5.126127000000 | 1.075282000000  |

|   |                 |                 |                 |
|---|-----------------|-----------------|-----------------|
| H | -3.967140000000 | -5.010371000000 | -0.613704000000 |
| H | -6.368931000000 | -4.609600000000 | 0.072517000000  |
| H | -5.896977000000 | -4.727201000000 | 1.774285000000  |
| H | -5.765237000000 | -6.143148000000 | 0.719319000000  |
| C | -2.908801000000 | -0.308906000000 | 1.626859000000  |
| C | -4.369296000000 | 0.151941000000  | 1.532481000000  |
| H | -2.797833000000 | -1.120946000000 | 2.351590000000  |
| H | -2.274912000000 | 0.514878000000  | 1.942937000000  |
| C | -4.899358000000 | 0.568504000000  | 2.909738000000  |
| H | -5.015678000000 | -0.634100000000 | 1.124643000000  |
| H | -4.445025000000 | 1.005333000000  | 0.849182000000  |
| C | -6.343167000000 | 1.072189000000  | 2.855891000000  |
| H | -4.246807000000 | 1.349107000000  | 3.322433000000  |
| H | -4.829629000000 | -0.286144000000 | 3.597203000000  |
| H | -6.701784000000 | 1.363544000000  | 3.849057000000  |
| H | -7.017844000000 | 0.298088000000  | 2.470272000000  |
| H | -6.430751000000 | 1.945731000000  | 2.198936000000  |
| P | 1.138687000000  | 0.753417000000  | -2.458222000000 |
| B | 0.393093000000  | -0.805076000000 | 1.191654000000  |
| O | 1.630098000000  | -0.300770000000 | 1.490626000000  |
| O | -0.201908000000 | -1.424347000000 | 2.271331000000  |
| C | 1.959267000000  | -0.685774000000 | 2.849119000000  |
| C | 0.546996000000  | -1.015596000000 | 3.456881000000  |
| C | 2.685322000000  | 0.481968000000  | 3.506607000000  |
| C | 2.884747000000  | -1.902077000000 | 2.753111000000  |
| C | 0.526090000000  | -2.162956000000 | 4.457215000000  |
| C | -0.160383000000 | 0.217669000000  | 4.025129000000  |
| H | 2.887571000000  | 0.272381000000  | 4.562914000000  |
| H | 2.100871000000  | 1.400804000000  | 3.432629000000  |
| H | 3.642353000000  | 0.646379000000  | 3.001843000000  |
| H | 3.750298000000  | -1.639369000000 | 2.138052000000  |
| H | 2.382715000000  | -2.750724000000 | 2.279409000000  |
| H | 3.241781000000  | -2.215575000000 | 3.739277000000  |
| H | 0.899188000000  | -3.089888000000 | 4.016201000000  |
| H | -0.499879000000 | -2.335615000000 | 4.797399000000  |
| H | 1.137214000000  | -1.921419000000 | 5.333812000000  |
| H | -0.189195000000 | 1.022799000000  | 3.286038000000  |
| H | 0.333261000000  | 0.573011000000  | 4.935220000000  |
| H | -1.190889000000 | -0.049284000000 | 4.279197000000  |
| C | 2.412203000000  | -0.616254000000 | -2.414134000000 |
| C | 3.173398000000  | -0.935834000000 | -1.281100000000 |
| C | 2.656444000000  | -1.315739000000 | -3.600592000000 |
| C | 4.140465000000  | -1.936572000000 | -1.333536000000 |
| H | 2.994767000000  | -0.410894000000 | -0.351605000000 |

|   |                 |                 |                 |
|---|-----------------|-----------------|-----------------|
| C | 3.627503000000  | -2.318070000000 | -3.658461000000 |
| H | 2.069877000000  | -1.078245000000 | -4.484610000000 |
| C | 4.371378000000  | -2.633236000000 | -2.522678000000 |
| H | 4.718237000000  | -2.175543000000 | -0.443195000000 |
| H | 3.798408000000  | -2.853690000000 | -4.589028000000 |
| H | 5.126689000000  | -3.414048000000 | -2.562471000000 |
| C | 2.320329000000  | 2.109105000000  | -1.963694000000 |
| C | 2.828992000000  | 2.913595000000  | -2.987868000000 |
| C | 2.767400000000  | 2.327087000000  | -0.652207000000 |
| C | 3.769103000000  | 3.911566000000  | -2.716947000000 |
| H | 2.480994000000  | 2.760141000000  | -4.006687000000 |
| C | 3.700604000000  | 3.324100000000  | -0.379004000000 |
| H | 2.369215000000  | 1.720978000000  | 0.154961000000  |
| C | 4.207249000000  | 4.120678000000  | -1.410656000000 |
| H | 4.152400000000  | 4.527993000000  | -3.526388000000 |
| H | 4.036067000000  | 3.482320000000  | 0.643675000000  |
| H | 4.934556000000  | 4.899087000000  | -1.194598000000 |
| C | 0.850560000000  | -4.325461000000 | -1.310967000000 |
| C | 0.414223000000  | -4.376650000000 | -2.633928000000 |
| C | -0.198375000000 | -3.255879000000 | -3.196990000000 |
| C | -0.368170000000 | -2.099062000000 | -2.441915000000 |
| C | 0.055048000000  | -2.037231000000 | -1.104888000000 |
| C | 0.660730000000  | -3.170347000000 | -0.552795000000 |
| H | 1.341193000000  | -5.185785000000 | -0.864615000000 |
| H | 0.560781000000  | -5.276383000000 | -3.224454000000 |
| H | -0.526709000000 | -3.274899000000 | -4.232404000000 |
| H | -0.803203000000 | -1.217921000000 | -2.901323000000 |
| H | 0.989445000000  | -3.152695000000 | 0.481145000000  |
| C | -0.221420000000 | -0.792728000000 | -0.270811000000 |
| C | 0.154046000000  | 0.518040000000  | -0.927369000000 |
| C | -0.272776000000 | 1.617204000000  | -0.191623000000 |
| O | -0.812503000000 | 1.545380000000  | 0.951341000000  |
| O | -0.173749000000 | 2.840276000000  | -0.820334000000 |
| C | -0.233689000000 | 3.985700000000  | 0.019936000000  |
| H | 0.687709000000  | 4.083104000000  | 0.607065000000  |
| H | -1.088998000000 | 3.932459000000  | 0.698403000000  |
| H | -0.326591000000 | 4.843607000000  | -0.649187000000 |

**TS<sub>6R/7Z</sub>**

|   |              |              |              |
|---|--------------|--------------|--------------|
| P | -0.923254000 | -1.045645000 | 1.819961000  |
| C | -1.343785000 | -2.822412000 | 1.470167000  |
| C | -1.810111000 | -3.170424000 | 0.051626000  |
| H | -2.100475000 | -3.118833000 | 2.212281000  |
| H | -0.426591000 | -3.372119000 | 1.696702000  |
| C | -2.271777000 | -4.630061000 | -0.073880000 |

|   |              |              |              |
|---|--------------|--------------|--------------|
| H | -2.632091000 | -2.513344000 | -0.250851000 |
| H | -0.986685000 | -2.973888000 | -0.636840000 |
| C | -1.168572000 | -5.658275000 | 0.194900000  |
| H | -3.115845000 | -4.810115000 | 0.607782000  |
| H | -2.662377000 | -4.781987000 | -1.088961000 |
| H | -0.803149000 | -5.602000000 | 1.226478000  |
| H | -1.531158000 | -6.679191000 | 0.030806000  |
| H | -0.311656000 | -5.492993000 | -0.467874000 |
| C | -0.120126000 | -1.175004000 | 3.484021000  |
| C | 1.332824000  | -1.660056000 | 3.409041000  |
| H | -0.726887000 | -1.827056000 | 4.127796000  |
| H | -0.146574000 | -0.172723000 | 3.922709000  |
| C | 2.093612000  | -1.450732000 | 4.721089000  |
| H | 1.358992000  | -2.720449000 | 3.126344000  |
| H | 1.850623000  | -1.121221000 | 2.612282000  |
| C | 3.565263000  | -1.853221000 | 4.604850000  |
| H | 2.027935000  | -0.390128000 | 4.998284000  |
| H | 1.609892000  | -2.016662000 | 5.529908000  |
| H | 4.099790000  | -1.702489000 | 5.549450000  |
| H | 3.668152000  | -2.909247000 | 4.326414000  |
| H | 4.067090000  | -1.256153000 | 3.834412000  |
| C | -2.546278000 | -0.243647000 | 2.229702000  |
| C | -3.640349000 | -0.374022000 | 1.162009000  |
| H | -2.334640000 | 0.819079000  | 2.392758000  |
| H | -2.903047000 | -0.652805000 | 3.185050000  |
| C | -4.885801000 | 0.447130000  | 1.509478000  |
| H | -3.259019000 | -0.046790000 | 0.188786000  |
| H | -3.926844000 | -1.426550000 | 1.050654000  |
| C | -5.970935000 | 0.340673000  | 0.435612000  |
| H | -5.284447000 | 0.114908000  | 2.478291000  |
| H | -4.593198000 | 1.497254000  | 1.643412000  |
| H | -5.594993000 | 0.686949000  | -0.534017000 |
| H | -6.302118000 | -0.697685000 | 0.312632000  |
| H | -6.849534000 | 0.943352000  | 0.691627000  |
| P | -1.471284000 | 2.796764000  | 0.122240000  |
| B | 0.843244000  | -0.666796000 | -0.596357000 |
| O | 1.958983000  | -0.226817000 | -1.385858000 |
| O | 1.150611000  | -1.974307000 | -0.096086000 |
| C | 2.641132000  | -1.403540000 | -1.841434000 |
| C | 2.390591000  | -2.425064000 | -0.665554000 |
| C | 2.011032000  | -1.848621000 | -3.171319000 |
| C | 4.107873000  | -1.047355000 | -2.074091000 |
| C | 3.460874000  | -2.364972000 | 0.432282000  |
| C | 2.221430000  | -3.876334000 | -1.116081000 |

|   |              |              |              |
|---|--------------|--------------|--------------|
| H | 2.055972000  | -1.008165000 | -3.871330000 |
| H | 2.546966000  | -2.695722000 | -3.613341000 |
| H | 0.961396000  | -2.120477000 | -3.043026000 |
| H | 4.686964000  | -1.930148000 | -2.368620000 |
| H | 4.180258000  | -0.308932000 | -2.879127000 |
| H | 4.562718000  | -0.615751000 | -1.179472000 |
| H | 3.132164000  | -2.975559000 | 1.278534000  |
| H | 4.424929000  | -2.751435000 | 0.084789000  |
| H | 3.603393000  | -1.344526000 | 0.794686000  |
| H | 3.128139000  | -4.246954000 | -1.608403000 |
| H | 2.026960000  | -4.509810000 | -0.244185000 |
| H | 1.381369000  | -3.984291000 | -1.805459000 |
| C | -0.031554000 | 3.913595000  | -0.210085000 |
| C | 1.110663000  | 3.524141000  | -0.922169000 |
| C | -0.096745000 | 5.215391000  | 0.306138000  |
| C | 2.159973000  | 4.422906000  | -1.117140000 |
| H | 1.187766000  | 2.513627000  | -1.311171000 |
| C | 0.947394000  | 6.116284000  | 0.102733000  |
| H | -0.971727000 | 5.521697000  | 0.875222000  |
| C | 2.081344000  | 5.720101000  | -0.608914000 |
| H | 3.042832000  | 4.104870000  | -1.665527000 |
| H | 0.881069000  | 7.122958000  | 0.507144000  |
| H | 2.901654000  | 6.416749000  | -0.759805000 |
| C | -2.562917000 | 3.215790000  | -1.309007000 |
| C | -2.078111000 | 3.650885000  | -2.549460000 |
| C | -3.945256000 | 3.080502000  | -1.133492000 |
| C | -2.956718000 | 3.908616000  | -3.599661000 |
| H | -1.009560000 | 3.775405000  | -2.693491000 |
| C | -4.827023000 | 3.329077000  | -2.185975000 |
| H | -4.331326000 | 2.774376000  | -0.165962000 |
| C | -4.332857000 | 3.739534000  | -3.424318000 |
| H | -2.568373000 | 4.240805000  | -4.559088000 |
| H | -5.896963000 | 3.211463000  | -2.035216000 |
| H | -5.015954000 | 3.940549000  | -4.245324000 |
| C | 3.296595000  | 1.832673000  | 2.178690000  |
| C | 2.746324000  | 2.505822000  | 3.269196000  |
| C | 1.359573000  | 2.535994000  | 3.423519000  |
| C | 0.537665000  | 1.887507000  | 2.504811000  |
| C | 1.076776000  | 1.179349000  | 1.418189000  |
| C | 2.472827000  | 1.176912000  | 1.265294000  |
| H | 4.373306000  | 1.820459000  | 2.032406000  |
| H | 3.388262000  | 3.013721000  | 3.983394000  |
| H | 0.913830000  | 3.072918000  | 4.256276000  |
| H | -0.537298000 | 1.938540000  | 2.632910000  |

|   |              |              |              |
|---|--------------|--------------|--------------|
| H | 2.892462000  | 0.688432000  | 0.396017000  |
| C | 0.234773000  | 0.470181000  | 0.408092000  |
| C | -0.775178000 | 1.171017000  | -0.342336000 |
| C | -1.115326000 | 0.338232000  | -1.418186000 |
| O | -0.455913000 | -0.764852000 | -1.568979000 |
| O | -2.130377000 | 0.589975000  | -2.242279000 |
| C | -2.300726000 | -0.286273000 | -3.364598000 |
| H | -3.142005000 | 0.130199000  | -3.918434000 |
| H | -1.400300000 | -0.297467000 | -3.984251000 |
| H | -2.521525000 | -1.303438000 | -3.031063000 |

**TS<sub>6S/7Z</sub>**

|   |              |              |              |
|---|--------------|--------------|--------------|
| P | 0.798471000  | 1.494050000  | 0.323701000  |
| C | 1.272028000  | 0.525099000  | -1.172905000 |
| C | 2.222946000  | -0.645668000 | -0.873024000 |
| H | 1.691507000  | 1.195154000  | -1.931775000 |
| H | 0.336294000  | 0.132536000  | -1.581615000 |
| C | 2.213312000  | -1.713949000 | -1.976812000 |
| H | 3.244160000  | -0.263711000 | -0.740623000 |
| H | 1.946058000  | -1.112131000 | 0.077656000  |
| C | 2.691788000  | -1.202029000 | -3.337290000 |
| H | 2.852146000  | -2.549955000 | -1.659743000 |
| H | 1.197125000  | -2.115617000 | -2.076569000 |
| H | 3.709683000  | -0.796853000 | -3.271472000 |
| H | 2.695201000  | -2.005909000 | -4.081262000 |
| H | 2.035812000  | -0.412691000 | -3.717387000 |
| C | 2.399428000  | 1.949765000  | 1.139683000  |
| C | 3.445112000  | 2.652966000  | 0.268009000  |
| H | 2.790204000  | 1.019522000  | 1.562403000  |
| H | 2.137324000  | 2.568783000  | 2.006024000  |
| C | 4.756124000  | 2.899326000  | 1.024571000  |
| H | 3.654244000  | 2.050688000  | -0.625868000 |
| H | 3.053692000  | 3.612826000  | -0.093296000 |
| C | 5.811918000  | 3.603873000  | 0.169861000  |
| H | 4.546940000  | 3.496541000  | 1.922812000  |
| H | 5.149282000  | 1.937913000  | 1.382370000  |
| H | 6.061167000  | 3.010050000  | -0.718015000 |
| H | 5.452457000  | 4.580693000  | -0.175938000 |
| H | 6.737724000  | 3.768548000  | 0.732072000  |
| C | 0.148092000  | 3.095868000  | -0.340820000 |
| C | -1.126801000 | 2.910741000  | -1.179379000 |
| H | 0.919948000  | 3.627074000  | -0.911090000 |
| H | -0.078989000 | 3.709560000  | 0.538831000  |
| C | -2.030187000 | 4.146868000  | -1.175171000 |
| H | -0.849941000 | 2.653704000  | -2.210489000 |



|   |              |              |              |
|---|--------------|--------------|--------------|
| H | -1.713634000 | 2.067559000  | -0.802148000 |
| C | -3.313545000 | 3.922474000  | -1.977267000 |
| H | -2.287518000 | 4.382022000  | -0.134107000 |
| H | -1.481421000 | 5.014319000  | -1.568742000 |
| H | -3.091733000 | 3.696978000  | -3.027845000 |
| H | -3.877397000 | 3.076451000  | -1.567869000 |
| H | -3.961675000 | 4.805750000  | -1.954533000 |
| P | -2.662925000 | -0.610433000 | -0.924274000 |
| B | -0.194215000 | -0.520684000 | 2.530857000  |
| O | 0.949450000  | 0.129617000  | 3.068054000  |
| O | -0.974713000 | -1.049538000 | 3.602460000  |
| C | 1.150240000  | -0.395305000 | 4.392338000  |
| C | -0.316550000 | -0.758151000 | 4.842765000  |
| C | 2.066686000  | -1.622538000 | 4.281214000  |
| C | 1.832517000  | 0.681335000  | 5.231490000  |
| C | -1.054471000 | 0.415050000  | 5.500835000  |
| C | -0.413331000 | -1.988224000 | 5.745221000  |
| H | 2.315182000  | -2.037110000 | 5.264101000  |
| H | 1.604600000  | -2.404468000 | 3.674118000  |
| H | 2.997425000  | -1.320461000 | 3.789366000  |
| H | 1.260168000  | 1.611822000  | 5.224933000  |
| H | 1.954315000  | 0.353813000  | 6.270221000  |
| H | 2.827093000  | 0.890990000  | 4.823116000  |
| H | -2.112524000 | 0.151030000  | 5.592402000  |
| H | -0.663979000 | 0.637212000  | 6.500380000  |
| H | -0.992337000 | 1.316827000  | 4.888273000  |
| H | -0.022602000 | -2.877804000 | 5.246504000  |
| H | 0.136605000  | -1.838051000 | 6.681902000  |
| H | -1.463067000 | -2.175164000 | 5.994252000  |
| C | -1.874921000 | -1.288410000 | -2.459390000 |
| C | -1.744263000 | -2.650260000 | -2.770921000 |
| C | -1.409722000 | -0.345074000 | -3.389022000 |
| C | -1.128712000 | -3.052126000 | -3.955384000 |
| H | -2.126467000 | -3.392821000 | -2.081505000 |
| C | -0.784594000 | -0.744927000 | -4.570956000 |
| H | -1.545512000 | 0.713033000  | -3.183920000 |
| C | -0.636321000 | -2.102313000 | -4.853887000 |
| H | -1.032042000 | -4.111464000 | -4.179133000 |
| H | -0.425311000 | 0.002472000  | -5.273232000 |
| H | -0.153374000 | -2.419470000 | -5.773994000 |
| C | -3.838760000 | -1.951976000 | -0.454194000 |
| C | -4.739757000 | -2.450215000 | -1.409981000 |
| C | -3.947918000 | -2.402667000 | 0.870012000  |
| C | -5.704685000 | -3.391337000 | -1.058004000 |

|                        |              |              |              |
|------------------------|--------------|--------------|--------------|
| H                      | -4.675870000 | -2.108028000 | -2.439628000 |
| C                      | -4.923422000 | -3.336934000 | 1.222345000  |
| H                      | -3.266538000 | -2.027031000 | 1.627898000  |
| C                      | -5.801021000 | -3.838821000 | 0.261762000  |
| H                      | -6.385150000 | -3.773551000 | -1.814495000 |
| H                      | -4.990340000 | -3.676416000 | 2.252620000  |
| H                      | -6.555864000 | -4.570063000 | 0.537432000  |
| C                      | -2.143787000 | 3.496789000  | 2.975936000  |
| C                      | -3.517999000 | 3.517586000  | 2.719190000  |
| C                      | -4.098409000 | 2.451366000  | 2.035518000  |
| C                      | -3.314905000 | 1.387431000  | 1.585100000  |
| C                      | -1.927321000 | 1.372193000  | 1.794592000  |
| C                      | -1.366210000 | 2.434949000  | 2.527956000  |
| H                      | -1.679736000 | 4.306616000  | 3.532501000  |
| H                      | -4.128026000 | 4.348288000  | 3.062520000  |
| H                      | -5.169146000 | 2.437713000  | 1.852476000  |
| H                      | -3.797793000 | 0.554636000  | 1.091298000  |
| H                      | -0.303862000 | 2.407597000  | 2.748236000  |
| C                      | -1.071015000 | 0.234461000  | 1.375708000  |
| C                      | -1.415220000 | -0.744376000 | 0.398478000  |
| C                      | -0.593504000 | -1.872411000 | 0.646725000  |
| O                      | 0.238585000  | -1.835020000 | 1.620959000  |
| O                      | -0.655089000 | -2.960553000 | -0.111357000 |
| C                      | 0.188914000  | -4.063399000 | 0.255209000  |
| H                      | 1.240858000  | -3.776447000 | 0.192615000  |
| H                      | -0.040340000 | -4.396818000 | 1.269696000  |
| H                      | -0.036876000 | -4.845146000 | -0.469817000 |
| <b>TS<sub>28</sub></b> |              |              |              |
| P                      | -0.900223000 | -2.176260000 | 0.524383000  |
| C                      | -0.696146000 | -1.363832000 | 2.151975000  |
| C                      | -1.874602000 | -0.527147000 | 2.653876000  |
| H                      | 0.192673000  | -0.734177000 | 2.026699000  |
| H                      | -0.443472000 | -2.149555000 | 2.875573000  |
| C                      | -1.550093000 | 0.135663000  | 3.997556000  |
| H                      | -2.094690000 | 0.249794000  | 1.916912000  |
| H                      | -2.770274000 | -1.155025000 | 2.764337000  |
| C                      | -2.751481000 | 0.858209000  | 4.609165000  |
| H                      | -1.182814000 | -0.624106000 | 4.701693000  |
| H                      | -0.724446000 | 0.842328000  | 3.845057000  |
| H                      | -2.487485000 | 1.332976000  | 5.560475000  |
| H                      | -3.126990000 | 1.639219000  | 3.939703000  |
| H                      | -3.575003000 | 0.159611000  | 4.801714000  |
| C                      | -2.213851000 | -3.449441000 | 0.661675000  |
| C                      | -2.358740000 | -4.257936000 | -0.638830000 |

|   |              |              |              |
|---|--------------|--------------|--------------|
| H | -3.143712000 | -2.924371000 | 0.893473000  |
| H | -1.989435000 | -4.104127000 | 1.512300000  |
| C | -3.640624000 | -5.101710000 | -0.686465000 |
| H | -2.357228000 | -3.574716000 | -1.496135000 |
| H | -1.482203000 | -4.907452000 | -0.753413000 |
| C | -4.920204000 | -4.263805000 | -0.777291000 |
| H | -3.582133000 | -5.762216000 | -1.560886000 |
| H | -3.682943000 | -5.759826000 | 0.192846000  |
| H | -5.079130000 | -3.655582000 | 0.119805000  |
| H | -4.881138000 | -3.576572000 | -1.629855000 |
| H | -5.799316000 | -4.906576000 | -0.895583000 |
| C | 0.688013000  | -3.027898000 | 0.220457000  |
| C | 1.013762000  | -4.173054000 | 1.184963000  |
| H | 1.439786000  | -2.233687000 | 0.270034000  |
| H | 0.665893000  | -3.372050000 | -0.818675000 |
| C | 2.395463000  | -4.772185000 | 0.896451000  |
| H | 0.991807000  | -3.815195000 | 2.222548000  |
| H | 0.254781000  | -4.963768000 | 1.111366000  |
| C | 2.749339000  | -5.922586000 | 1.840807000  |
| H | 2.424253000  | -5.122500000 | -0.144269000 |
| H | 3.150547000  | -3.979018000 | 0.974986000  |
| H | 2.021857000  | -6.739389000 | 1.759337000  |
| H | 3.739188000  | -6.332801000 | 1.614196000  |
| H | 2.757795000  | -5.587664000 | 2.885024000  |
| P | 2.063850000  | 0.700836000  | 0.642867000  |
| B | 0.718284000  | 2.092885000  | 0.372983000  |
| O | -0.549269000 | 1.940455000  | 0.879250000  |
| O | 1.018973000  | 3.374840000  | 0.018405000  |
| C | -1.287628000 | 3.166377000  | 0.592154000  |
| C | -0.134399000 | 4.210989000  | 0.290453000  |
| C | -2.198939000 | 2.871019000  | -0.601274000 |
| C | -2.134548000 | 3.498780000  | 1.816851000  |
| C | 0.248686000  | 5.078103000  | 1.492852000  |
| C | -0.376932000 | 5.079967000  | -0.939724000 |
| H | -2.874681000 | 2.051975000  | -0.338333000 |
| H | -2.804850000 | 3.745995000  | -0.859872000 |
| H | -1.616374000 | 2.557867000  | -1.467898000 |
| H | -2.894120000 | 2.723075000  | 1.953423000  |
| H | -1.532742000 | 3.552349000  | 2.726903000  |
| H | -2.653112000 | 4.454360000  | 1.683451000  |
| H | 0.499027000  | 4.463211000  | 2.361773000  |
| H | 1.138018000  | 5.660909000  | 1.235626000  |
| H | -0.553685000 | 5.771092000  | 1.766131000  |
| H | -0.490762000 | 4.463394000  | -1.832751000 |

|   |              |              |              |
|---|--------------|--------------|--------------|
| H | -1.270213000 | 5.702207000  | -0.814181000 |
| H | 0.481902000  | 5.741893000  | -1.089021000 |
| C | 3.045759000  | 1.662215000  | 1.892513000  |
| C | 4.434664000  | 1.832184000  | 1.817613000  |
| C | 2.375926000  | 2.159540000  | 3.024067000  |
| C | 5.128857000  | 2.489025000  | 2.835224000  |
| H | 4.974716000  | 1.460514000  | 0.952417000  |
| C | 3.067423000  | 2.818328000  | 4.038123000  |
| H | 1.297322000  | 2.037192000  | 3.104886000  |
| C | 4.450907000  | 2.987386000  | 3.947948000  |
| H | 6.205646000  | 2.615488000  | 2.753764000  |
| H | 2.525657000  | 3.202799000  | 4.898878000  |
| H | 4.993151000  | 3.501860000  | 4.736464000  |
| C | 3.094226000  | 0.856446000  | -0.880180000 |
| C | 3.456857000  | -0.314812000 | -1.556230000 |
| C | 3.505757000  | 2.093065000  | -1.400659000 |
| C | 4.217601000  | -0.259316000 | -2.725399000 |
| H | 3.120761000  | -1.273995000 | -1.175093000 |
| C | 4.272839000  | 2.149327000  | -2.562813000 |
| H | 3.204125000  | 3.007072000  | -0.902243000 |
| C | 4.630767000  | 0.973927000  | -3.228956000 |
| H | 4.484237000  | -1.177692000 | -3.241717000 |
| H | 4.583514000  | 3.113661000  | -2.956633000 |
| H | 5.225386000  | 1.021021000  | -4.137662000 |
| C | -4.972694000 | -0.437135000 | -0.979396000 |
| C | -5.188298000 | -0.373408000 | -2.355593000 |
| C | -4.105458000 | -0.526838000 | -3.225304000 |
| C | -2.824665000 | -0.750751000 | -2.726421000 |
| C | -2.593156000 | -0.821135000 | -1.341534000 |
| C | -3.689357000 | -0.660142000 | -0.479906000 |
| H | -5.802486000 | -0.306258000 | -0.289829000 |
| H | -6.186957000 | -0.202071000 | -2.747039000 |
| H | -4.260691000 | -0.478273000 | -4.299827000 |
| H | -1.984893000 | -0.872397000 | -3.402895000 |
| H | -3.537661000 | -0.677195000 | 0.593529000  |
| C | -1.205082000 | -1.057882000 | -0.857319000 |
| C | -0.051992000 | -0.581138000 | -1.344266000 |
| C | 0.186603000  | 0.395378000  | -2.339958000 |
| O | 0.319760000  | 1.606204000  | -2.111609000 |
| O | 0.437962000  | -0.123927000 | -3.581682000 |
| C | 0.973784000  | 0.814262000  | -4.523551000 |
| H | 1.161527000  | 0.237827000  | -5.431505000 |
| H | 0.259949000  | 1.618011000  | -4.727062000 |
| H | 1.903392000  | 1.249332000  | -4.149380000 |

TS<sub>8/9</sub>

|   |              |              |              |
|---|--------------|--------------|--------------|
| P | -0.512690000 | -2.602568000 | 0.866045000  |
| C | -0.066911000 | -2.080002000 | 2.567014000  |
| C | -1.228238000 | -1.569215000 | 3.428084000  |
| H | 0.668440000  | -1.278015000 | 2.429212000  |
| H | 0.446920000  | -2.920848000 | 3.052321000  |
| C | -0.748408000 | -1.132731000 | 4.815730000  |
| H | -1.701860000 | -0.719746000 | 2.927049000  |
| H | -1.997019000 | -2.346816000 | 3.535434000  |
| C | -1.885935000 | -0.578194000 | 5.673704000  |
| H | -0.276778000 | -1.985719000 | 5.324772000  |
| H | 0.025155000  | -0.366125000 | 4.696447000  |
| H | -1.522052000 | -0.263879000 | 6.658042000  |
| H | -2.341080000 | 0.293654000  | 5.191841000  |
| H | -2.671886000 | -1.327748000 | 5.829848000  |
| C | -1.554491000 | -4.116518000 | 0.995098000  |
| C | -2.303217000 | -4.454021000 | -0.305285000 |
| H | -2.249441000 | -3.972733000 | 1.827011000  |
| H | -0.887988000 | -4.938295000 | 1.287035000  |
| C | -3.361759000 | -5.550842000 | -0.119084000 |
| H | -2.784621000 | -3.550328000 | -0.695129000 |
| H | -1.576792000 | -4.767275000 | -1.062371000 |
| C | -4.550243000 | -5.119521000 | 0.746635000  |
| H | -3.729754000 | -5.840018000 | -1.111301000 |
| H | -2.893900000 | -6.448799000 | 0.308262000  |
| H | -4.252196000 | -4.906685000 | 1.780045000  |
| H | -5.018434000 | -4.213831000 | 0.344048000  |
| H | -5.311657000 | -5.905605000 | 0.786263000  |
| C | 1.072731000  | -3.069879000 | 0.095986000  |
| C | 0.986308000  | -3.519969000 | -1.374861000 |
| H | 1.533590000  | -3.836205000 | 0.731580000  |
| H | 1.675821000  | -2.160614000 | 0.181806000  |
| C | 2.256406000  | -3.161179000 | -2.152617000 |
| H | 0.809712000  | -4.602681000 | -1.420543000 |
| H | 0.140567000  | -3.034664000 | -1.869089000 |
| C | 2.163894000  | -3.557769000 | -3.626434000 |
| H | 2.409533000  | -2.077412000 | -2.075902000 |
| H | 3.129747000  | -3.637625000 | -1.684938000 |
| H | 1.316108000  | -3.052012000 | -4.101987000 |
| H | 3.072756000  | -3.280693000 | -4.171283000 |
| H | 2.019950000  | -4.639241000 | -3.741937000 |
| P | 1.405758000  | 0.854423000  | 0.404947000  |
| B | 0.868741000  | 1.996379000  | -1.193414000 |
| O | -0.447144000 | 2.544092000  | -0.983024000 |

|   |              |              |              |
|---|--------------|--------------|--------------|
| O | 1.745661000  | 3.044723000  | -1.582086000 |
| C | -0.448735000 | 3.870631000  | -1.528597000 |
| C | 1.057296000  | 4.286896000  | -1.382975000 |
| C | -0.894090000 | 3.781342000  | -2.995771000 |
| C | -1.436667000 | 4.715334000  | -0.729142000 |
| C | 1.383643000  | 4.810543000  | 0.023421000  |
| C | 1.548941000  | 5.283355000  | -2.430210000 |
| H | -1.865885000 | 3.277648000  | -3.037659000 |
| H | -0.999194000 | 4.770235000  | -3.455595000 |
| H | -0.178174000 | 3.195516000  | -3.578658000 |
| H | -2.455119000 | 4.345923000  | -0.893908000 |
| H | -1.227549000 | 4.655200000  | 0.341091000  |
| H | -1.402773000 | 5.766062000  | -1.040044000 |
| H | 1.027585000  | 4.121068000  | 0.794068000  |
| H | 2.470219000  | 4.902563000  | 0.116986000  |
| H | 0.941090000  | 5.795990000  | 0.205928000  |
| H | 1.451356000  | 4.877404000  | -3.439332000 |
| H | 0.990191000  | 6.225066000  | -2.371801000 |
| H | 2.607458000  | 5.503716000  | -2.257500000 |
| C | 0.771115000  | 1.558690000  | 1.957497000  |
| C | 1.551502000  | 1.705523000  | 3.119652000  |
| C | -0.600358000 | 1.879254000  | 2.030913000  |
| C | 0.988412000  | 2.187096000  | 4.301369000  |
| H | 2.607632000  | 1.456580000  | 3.093054000  |
| C | -1.157065000 | 2.353584000  | 3.217102000  |
| H | -1.218117000 | 1.784877000  | 1.146811000  |
| C | -0.367943000 | 2.515349000  | 4.358492000  |
| H | 1.614614000  | 2.306104000  | 5.182189000  |
| H | -2.215007000 | 2.602373000  | 3.244400000  |
| H | -0.804260000 | 2.888126000  | 5.280866000  |
| C | 3.236836000  | 0.949829000  | 0.485148000  |
| C | 4.009936000  | -0.161104000 | 0.119891000  |
| C | 3.900638000  | 2.139950000  | 0.829414000  |
| C | 5.403769000  | -0.091549000 | 0.096581000  |
| H | 3.517331000  | -1.088365000 | -0.156704000 |
| C | 5.292108000  | 2.205066000  | 0.826046000  |
| H | 3.321150000  | 3.014970000  | 1.098782000  |
| C | 6.049292000  | 1.090690000  | 0.456190000  |
| H | 5.983212000  | -0.963466000 | -0.195736000 |
| H | 5.787787000  | 3.133209000  | 1.098694000  |
| H | 7.134419000  | 1.146494000  | 0.445866000  |
| C | -4.809211000 | -0.832821000 | 1.040840000  |
| C | -5.147688000 | 0.378152000  | 0.440204000  |
| C | -4.181461000 | 1.049462000  | -0.314853000 |

|   |              |              |              |
|---|--------------|--------------|--------------|
| C | -2.906696000 | 0.519290000  | -0.478856000 |
| C | -2.549854000 | -0.707251000 | 0.117605000  |
| C | -3.529395000 | -1.363767000 | 0.884467000  |
| H | -5.538439000 | -1.370252000 | 1.641622000  |
| H | -6.142459000 | 0.796289000  | 0.564019000  |
| H | -4.418880000 | 2.004552000  | -0.776730000 |
| H | -2.159231000 | 1.076593000  | -1.031477000 |
| H | -3.302481000 | -2.298244000 | 1.380636000  |
| C | -1.186312000 | -1.245829000 | -0.090912000 |
| C | -0.221184000 | -0.663180000 | -0.838038000 |
| C | 0.101083000  | -0.130901000 | -2.037548000 |
| O | 0.860252000  | 0.911474000  | -2.277034000 |
| O | -0.342313000 | -0.810445000 | -3.132943000 |
| C | -0.187265000 | -0.148588000 | -4.395205000 |
| H | -0.625035000 | -0.831381000 | -5.125490000 |
| H | -0.720958000 | 0.806141000  | -4.404791000 |
| H | 0.866586000  | 0.027525000  | -4.623495000 |

**TS<sub>9/10E</sub>**

|   |              |              |              |
|---|--------------|--------------|--------------|
| P | -0.402131000 | -2.015835000 | 1.019607000  |
| C | -1.129027000 | -1.333200000 | -0.520996000 |
| C | -1.875103000 | -2.313149000 | -1.433459000 |
| H | -0.287348000 | -0.871274000 | -1.043901000 |
| H | -1.795328000 | -0.512459000 | -0.255431000 |
| C | -2.344775000 | -1.630295000 | -2.728842000 |
| H | -1.243138000 | -3.173747000 | -1.691793000 |
| H | -2.749117000 | -2.713303000 | -0.905936000 |
| C | -1.199559000 | -1.222181000 | -3.659762000 |
| H | -3.017205000 | -2.314437000 | -3.262242000 |
| H | -2.936272000 | -0.744899000 | -2.463532000 |
| H | -1.584060000 | -0.785530000 | -4.588083000 |
| H | -0.544497000 | -0.479424000 | -3.194801000 |
| H | -0.582991000 | -2.089188000 | -3.928733000 |
| C | 0.802168000  | -3.284279000 | 0.429372000  |
| C | 2.084732000  | -2.708774000 | -0.173583000 |
| H | 0.259001000  | -3.884685000 | -0.311847000 |
| H | 1.036847000  | -3.967003000 | 1.250494000  |
| C | 3.034348000  | -3.816654000 | -0.640755000 |
| H | 1.841029000  | -2.050571000 | -1.015872000 |
| H | 2.583086000  | -2.079803000 | 0.569616000  |
| C | 4.331202000  | -3.277551000 | -1.247382000 |
| H | 3.272367000  | -4.466595000 | 0.213199000  |
| H | 2.520974000  | -4.453339000 | -1.375527000 |
| H | 4.872641000  | -2.656392000 | -0.524802000 |
| H | 4.995375000  | -4.092379000 | -1.556374000 |

|   |              |              |              |
|---|--------------|--------------|--------------|
| H | 4.125784000  | -2.656480000 | -2.126253000 |
| C | -1.736375000 | -3.049392000 | 1.783154000  |
| C | -1.277165000 | -3.784620000 | 3.052035000  |
| H | -2.114154000 | -3.755577000 | 1.035034000  |
| H | -2.547370000 | -2.350213000 | 2.019041000  |
| C | -2.441274000 | -4.358654000 | 3.871090000  |
| H | -0.594940000 | -4.600143000 | 2.776597000  |
| H | -0.697000000 | -3.102375000 | 3.683547000  |
| C | -3.268388000 | -5.408131000 | 3.123912000  |
| H | -2.036030000 | -4.801976000 | 4.789817000  |
| H | -3.093862000 | -3.533499000 | 4.188426000  |
| H | -4.040468000 | -5.836715000 | 3.772018000  |
| H | -3.773086000 | -4.980397000 | 2.250423000  |
| H | -2.633247000 | -6.230740000 | 2.771763000  |
| P | 0.205311000  | 1.974220000  | 0.753652000  |
| B | -2.125348000 | 2.429249000  | 0.237994000  |
| O | -2.363151000 | 3.786743000  | 0.132693000  |
| O | -2.297700000 | 1.759064000  | -0.984553000 |
| C | -2.396487000 | 4.101987000  | -1.275703000 |
| C | -2.840231000 | 2.731720000  | -1.913795000 |
| C | -3.380458000 | 5.248628000  | -1.484879000 |
| C | -0.989224000 | 4.541316000  | -1.696418000 |
| C | -2.275212000 | 2.463931000  | -3.303832000 |
| C | -4.360615000 | 2.538663000  | -1.916965000 |
| H | -3.000059000 | 6.150498000  | -0.995423000 |
| H | -3.504825000 | 5.465928000  | -2.551821000 |
| H | -4.357573000 | 5.018080000  | -1.055828000 |
| H | -0.263013000 | 3.734414000  | -1.575084000 |
| H | -0.968631000 | 4.880062000  | -2.737418000 |
| H | -0.676384000 | 5.369711000  | -1.054175000 |
| H | -2.602367000 | 1.480718000  | -3.655601000 |
| H | -2.632528000 | 3.215371000  | -4.016962000 |
| H | -1.183385000 | 2.479994000  | -3.306658000 |
| H | -4.778812000 | 2.733273000  | -0.925243000 |
| H | -4.853940000 | 3.194625000  | -2.641804000 |
| H | -4.584579000 | 1.500718000  | -2.182294000 |
| C | 0.996891000  | 3.168109000  | 1.891139000  |
| C | 2.229430000  | 3.780177000  | 1.624394000  |
| C | 0.267727000  | 3.577897000  | 3.020283000  |
| C | 2.738429000  | 4.750144000  | 2.488095000  |
| H | 2.799417000  | 3.491270000  | 0.747576000  |
| C | 0.780776000  | 4.544153000  | 3.881828000  |
| H | -0.702360000 | 3.134216000  | 3.223543000  |
| C | 2.021279000  | 5.130922000  | 3.622541000  |



|                             |              |              |              |
|-----------------------------|--------------|--------------|--------------|
| H                           | 3.701526000  | 5.205812000  | 2.273813000  |
| H                           | 0.208677000  | 4.842318000  | 4.756223000  |
| H                           | 2.421318000  | 5.884031000  | 4.295510000  |
| C                           | 1.549905000  | 1.277238000  | -0.260222000 |
| C                           | 1.344145000  | 1.161797000  | -1.642816000 |
| C                           | 2.770408000  | 0.852420000  | 0.287549000  |
| C                           | 2.343386000  | 0.644960000  | -2.469293000 |
| H                           | 0.393791000  | 1.472830000  | -2.065040000 |
| C                           | 3.774187000  | 0.355955000  | -0.542488000 |
| H                           | 2.931488000  | 0.910877000  | 1.358753000  |
| C                           | 3.565016000  | 0.253589000  | -1.919837000 |
| H                           | 2.171122000  | 0.560944000  | -3.538780000 |
| H                           | 4.717958000  | 0.035484000  | -0.110536000 |
| H                           | 4.351376000  | -0.134126000 | -2.561046000 |
| C                           | 3.053540000  | -2.079278000 | 4.158240000  |
| C                           | 3.472693000  | -0.928220000 | 4.828723000  |
| C                           | 2.778935000  | 0.259166000  | 4.586584000  |
| C                           | 1.716848000  | 0.301217000  | 3.689134000  |
| C                           | 1.299940000  | -0.841777000 | 2.958079000  |
| C                           | 1.995389000  | -2.042226000 | 3.255804000  |
| H                           | 3.551731000  | -3.028491000 | 4.343877000  |
| H                           | 4.301206000  | -0.960887000 | 5.529876000  |
| H                           | 3.058726000  | 1.172217000  | 5.107431000  |
| H                           | 1.187274000  | 1.233487000  | 3.549574000  |
| H                           | 1.695693000  | -2.972860000 | 2.791365000  |
| C                           | 0.223111000  | -0.716862000 | 1.989829000  |
| C                           | -0.456786000 | 0.573523000  | 1.753095000  |
| C                           | -1.777699000 | 0.800590000  | 2.008591000  |
| O                           | -2.476528000 | 1.823981000  | 1.478484000  |
| O                           | -2.585840000 | 0.056170000  | 2.801634000  |
| C                           | -2.055506000 | -0.297691000 | 4.088467000  |
| H                           | -1.726339000 | 0.602763000  | 4.617279000  |
| H                           | -2.881958000 | -0.766775000 | 4.625286000  |
| H                           | -1.213119000 | -0.983852000 | 3.997219000  |
| <b>TS<sub>10E/11R</sub></b> |              |              |              |
| P                           | 1.933054000  | 1.350710000  | -0.771118000 |
| C                           | 3.669209000  | 1.098196000  | -1.457202000 |
| C                           | 3.732565000  | 0.403673000  | -2.823454000 |
| H                           | 4.224583000  | 0.514960000  | -0.712457000 |
| H                           | 4.163699000  | 2.076496000  | -1.515236000 |
| C                           | 5.125081000  | -0.137731000 | -3.163425000 |
| H                           | 3.010067000  | -0.421925000 | -2.862612000 |
| H                           | 3.420487000  | 1.103290000  | -3.609542000 |
| C                           | 5.155577000  | -0.877209000 | -4.502833000 |

|   |              |              |              |
|---|--------------|--------------|--------------|
| H | 5.845335000  | 0.691812000  | -3.175254000 |
| H | 5.452393000  | -0.813095000 | -2.361315000 |
| H | 4.465857000  | -1.730469000 | -4.492811000 |
| H | 4.853560000  | -0.218178000 | -5.325936000 |
| H | 6.157105000  | -1.258715000 | -4.730232000 |
| C | 1.080865000  | 2.074807000  | -2.249571000 |
| C | 0.340749000  | 1.065943000  | -3.134297000 |
| H | 1.846857000  | 2.604622000  | -2.831365000 |
| H | 0.370893000  | 2.810959000  | -1.870436000 |
| C | -0.614161000 | 1.751046000  | -4.115726000 |
| H | 1.060811000  | 0.445506000  | -3.680380000 |
| H | -0.245863000 | 0.393573000  | -2.506001000 |
| C | -1.378277000 | 0.735658000  | -4.968055000 |
| H | -1.327105000 | 2.355090000  | -3.540931000 |
| H | -0.056907000 | 2.442809000  | -4.763508000 |
| H | -1.972506000 | 0.069215000  | -4.331784000 |
| H | -2.062860000 | 1.230811000  | -5.665589000 |
| H | -0.692118000 | 0.113663000  | -5.556810000 |
| C | 2.386502000  | 2.637748000  | 0.492366000  |
| C | 2.437357000  | 4.069794000  | -0.053327000 |
| H | 3.373051000  | 2.347803000  | 0.877729000  |
| H | 1.676148000  | 2.536128000  | 1.312015000  |
| C | 2.958938000  | 5.091941000  | 0.968636000  |
| H | 3.079774000  | 4.104920000  | -0.943278000 |
| H | 1.435629000  | 4.371559000  | -0.385616000 |
| C | 2.068418000  | 5.251177000  | 2.203993000  |
| H | 3.971645000  | 4.800930000  | 1.280292000  |
| H | 3.059002000  | 6.064487000  | 0.468714000  |
| H | 2.464575000  | 6.019223000  | 2.877157000  |
| H | 1.051596000  | 5.547859000  | 1.919798000  |
| H | 1.993859000  | 4.318765000  | 2.773648000  |
| P | -1.051699000 | -1.704437000 | -0.430594000 |
| B | -2.818874000 | 1.157999000  | -0.292425000 |
| O | -3.893010000 | 1.503286000  | -1.080508000 |
| O | -3.173135000 | 0.542379000  | 0.884921000  |
| C | -5.079254000 | 1.309794000  | -0.265705000 |
| C | -4.594407000 | 0.256540000  | 0.801481000  |
| C | -5.420741000 | 2.671047000  | 0.348456000  |
| C | -6.213263000 | 0.837412000  | -1.166986000 |
| C | -4.750051000 | -1.190743000 | 0.329367000  |
| C | -5.187618000 | 0.417694000  | 2.196244000  |
| H | -6.345124000 | 2.630854000  | 0.933493000  |
| H | -4.613612000 | 3.022131000  | 0.999433000  |
| H | -5.549028000 | 3.400913000  | -0.456338000 |

|   |              |              |              |
|---|--------------|--------------|--------------|
| H | -7.110885000 | 0.616945000  | -0.578473000 |
| H | -6.461758000 | 1.623723000  | -1.886684000 |
| H | -5.931316000 | -0.057048000 | -1.725703000 |
| H | -4.292789000 | -1.336304000 | -0.653302000 |
| H | -4.244553000 | -1.853258000 | 1.035050000  |
| H | -5.805170000 | -1.478117000 | 0.275910000  |
| H | -6.272247000 | 0.262268000  | 2.179065000  |
| H | -4.742874000 | -0.328525000 | 2.861711000  |
| H | -4.980806000 | 1.407299000  | 2.609365000  |
| C | 0.106461000  | -2.961004000 | -1.117143000 |
| C | 0.629563000  | -4.052544000 | -0.412785000 |
| C | 0.498754000  | -2.770765000 | -2.452520000 |
| C | 1.524798000  | -4.927789000 | -1.025912000 |
| H | 0.360993000  | -4.201821000 | 0.626509000  |
| C | 1.411937000  | -3.632456000 | -3.057796000 |
| H | 0.088557000  | -1.937866000 | -3.017114000 |
| C | 1.925345000  | -4.718478000 | -2.346067000 |
| H | 1.929374000  | -5.762493000 | -0.460284000 |
| H | 1.711337000  | -3.464150000 | -4.089312000 |
| H | 2.631508000  | -5.396543000 | -2.817557000 |
| C | -1.499691000 | -2.331142000 | 1.236553000  |
| C | -2.083695000 | -3.603320000 | 1.352960000  |
| C | -1.425772000 | -1.515742000 | 2.376797000  |
| C | -2.552194000 | -4.064396000 | 2.582649000  |
| H | -2.174411000 | -4.237967000 | 0.475324000  |
| C | -1.909062000 | -1.976091000 | 3.601961000  |
| H | -1.024614000 | -0.510726000 | 2.302677000  |
| C | -2.468224000 | -3.250246000 | 3.713612000  |
| H | -2.990687000 | -5.056277000 | 2.654200000  |
| H | -1.846883000 | -1.331497000 | 4.475009000  |
| H | -2.838941000 | -3.604761000 | 4.671476000  |
| C | 2.883275000  | -2.805924000 | 2.190637000  |
| C | 3.893775000  | -3.418879000 | 1.448670000  |
| C | 4.120555000  | -3.015062000 | 0.132003000  |
| C | 3.349865000  | -2.005292000 | -0.437756000 |
| C | 2.334435000  | -1.372764000 | 0.295275000  |
| C | 2.118148000  | -1.790845000 | 1.621598000  |
| H | 2.690772000  | -3.115438000 | 3.214340000  |
| H | 4.494910000  | -4.209390000 | 1.889585000  |
| H | 4.886598000  | -3.503346000 | -0.463980000 |
| H | 3.495536000  | -1.753775000 | -1.478046000 |
| H | 1.334169000  | -1.309615000 | 2.195667000  |
| C | 1.452137000  | -0.307230000 | -0.232276000 |
| C | 0.071302000  | -0.281537000 | -0.086611000 |

|   |              |             |              |
|---|--------------|-------------|--------------|
| C | -0.377854000 | 1.088702000 | 0.046227000  |
| O | -1.547694000 | 1.465284000 | -0.665602000 |
| O | -0.418040000 | 1.518443000 | 1.398088000  |
| C | -0.831708000 | 2.859580000 | 1.586740000  |
| H | -0.354497000 | 3.541498000 | 0.871136000  |
| H | -1.919825000 | 2.960004000 | 1.493071000  |
| H | -0.539950000 | 3.136706000 | 2.603577000  |

**TS<sub>10E/11S</sub>**

|   |              |              |              |
|---|--------------|--------------|--------------|
| P | -1.001267000 | -0.985769000 | 1.755111000  |
| C | -2.217569000 | -2.357615000 | 2.129550000  |
| C | -1.579045000 | -3.751227000 | 2.237500000  |
| H | -2.964620000 | -2.359768000 | 1.331427000  |
| H | -2.755225000 | -2.112776000 | 3.052382000  |
| C | -2.610383000 | -4.882065000 | 2.175992000  |
| H | -0.859098000 | -3.897331000 | 1.424861000  |
| H | -1.006614000 | -3.827551000 | 3.171539000  |
| C | -1.963302000 | -6.268201000 | 2.200679000  |
| H | -3.319092000 | -4.780919000 | 3.010182000  |
| H | -3.194881000 | -4.771131000 | 1.253398000  |
| H | -1.296309000 | -6.396837000 | 1.339767000  |
| H | -1.367022000 | -6.413476000 | 3.110015000  |
| H | -2.715524000 | -7.064196000 | 2.163871000  |
| C | 0.046657000  | -1.129060000 | 3.305003000  |
| C | -0.709295000 | -1.225784000 | 4.635891000  |
| H | 0.712493000  | -0.264716000 | 3.301903000  |
| H | 0.695932000  | -2.002487000 | 3.168402000  |
| C | 0.245695000  | -1.168171000 | 5.835606000  |
| H | -1.433747000 | -0.404289000 | 4.723447000  |
| H | -1.288076000 | -2.155109000 | 4.691072000  |
| C | -0.483790000 | -1.266353000 | 7.177458000  |
| H | 0.977417000  | -1.983369000 | 5.750730000  |
| H | 0.822079000  | -0.234508000 | 5.792903000  |
| H | -1.042024000 | -2.207311000 | 7.256111000  |
| H | 0.217024000  | -1.222518000 | 8.018490000  |
| H | -1.201138000 | -0.445283000 | 7.297389000  |
| C | -2.028851000 | 0.536124000  | 1.942238000  |
| C | -3.036675000 | 0.741065000  | 0.806098000  |
| H | -1.351733000 | 1.390756000  | 2.016884000  |
| H | -2.546483000 | 0.431548000  | 2.902790000  |
| C | -3.754543000 | 2.095839000  | 0.872497000  |
| H | -2.513161000 | 0.657526000  | -0.148681000 |
| H | -3.780424000 | -0.067683000 | 0.820916000  |
| C | -4.621765000 | 2.284206000  | 2.120104000  |
| H | -3.006459000 | 2.899195000  | 0.820829000  |

|   |              |              |              |
|---|--------------|--------------|--------------|
| H | -4.379599000 | 2.200888000  | -0.024111000 |
| H | -5.161481000 | 3.236929000  | 2.087393000  |
| H | -5.364774000 | 1.481361000  | 2.206307000  |
| H | -4.019871000 | 2.279355000  | 3.035678000  |
| P | 0.493528000  | 0.212933000  | -2.172435000 |
| B | 2.081299000  | 2.387098000  | 0.372170000  |
| O | 2.477430000  | 3.639217000  | 0.772277000  |
| O | 2.923241000  | 1.809449000  | -0.553752000 |
| C | 3.554518000  | 4.038581000  | -0.115043000 |
| C | 4.095708000  | 2.653972000  | -0.641651000 |
| C | 2.926578000  | 4.892868000  | -1.217862000 |
| C | 4.561983000  | 4.856077000  | 0.684521000  |
| C | 5.153940000  | 2.031205000  | 0.273904000  |
| C | 4.573104000  | 2.659178000  | -2.088875000 |
| H | 3.685277000  | 5.293971000  | -1.898100000 |
| H | 2.204010000  | 4.317677000  | -1.799655000 |
| H | 2.396106000  | 5.730973000  | -0.756283000 |
| H | 5.430074000  | 5.112150000  | 0.066600000  |
| H | 4.095134000  | 5.787862000  | 1.018532000  |
| H | 4.906977000  | 4.314488000  | 1.567788000  |
| H | 4.806657000  | 2.006282000  | 1.311176000  |
| H | 5.334365000  | 1.000769000  | -0.046615000 |
| H | 6.100749000  | 2.579155000  | 0.232288000  |
| H | 5.419994000  | 3.342309000  | -2.219043000 |
| H | 4.899253000  | 1.652659000  | -2.369073000 |
| H | 3.770738000  | 2.955148000  | -2.767533000 |
| C | -1.012444000 | -0.423276000 | -3.046474000 |
| C | -2.290256000 | 0.139274000  | -2.921034000 |
| C | -0.849034000 | -1.536578000 | -3.881898000 |
| C | -3.381257000 | -0.418582000 | -3.585652000 |
| H | -2.431271000 | 1.030250000  | -2.318233000 |
| C | -1.937706000 | -2.096215000 | -4.549020000 |
| H | 0.136305000  | -1.980487000 | -3.988939000 |
| C | -3.208704000 | -1.541645000 | -4.397576000 |
| H | -4.366282000 | 0.028075000  | -3.475912000 |
| H | -1.794103000 | -2.968842000 | -5.179921000 |
| H | -4.059616000 | -1.976695000 | -4.914951000 |
| C | 0.158301000  | 2.021997000  | -2.337249000 |
| C | 0.674192000  | 2.637592000  | -3.488441000 |
| C | -0.641200000 | 2.782481000  | -1.472578000 |
| C | 0.383542000  | 3.970489000  | -3.779135000 |
| H | 1.303082000  | 2.061534000  | -4.162509000 |
| C | -0.917873000 | 4.120749000  | -1.753291000 |
| H | -1.027365000 | 2.333938000  | -0.567488000 |

|                             |              |              |              |
|-----------------------------|--------------|--------------|--------------|
| C                           | -0.413949000 | 4.716995000  | -2.909892000 |
| H                           | 0.787750000  | 4.428414000  | -4.677933000 |
| H                           | -1.531540000 | 4.696384000  | -1.065565000 |
| H                           | -0.633248000 | 5.758415000  | -3.128162000 |
| C                           | -2.493607000 | -4.040010000 | -1.774696000 |
| C                           | -1.458328000 | -4.887182000 | -2.175078000 |
| C                           | -0.137659000 | -4.545275000 | -1.882208000 |
| C                           | 0.141246000  | -3.375239000 | -1.176987000 |
| C                           | -0.890273000 | -2.525895000 | -0.743198000 |
| C                           | -2.210952000 | -2.875002000 | -1.067643000 |
| H                           | -3.522330000 | -4.278100000 | -2.029810000 |
| H                           | -1.678827000 | -5.798961000 | -2.723180000 |
| H                           | 0.676543000  | -5.190099000 | -2.202190000 |
| H                           | 1.168678000  | -3.107939000 | -0.953390000 |
| H                           | -3.013675000 | -2.195367000 | -0.804579000 |
| C                           | -0.586583000 | -1.294513000 | 0.026374000  |
| C                           | 0.195437000  | -0.207611000 | -0.388186000 |
| C                           | 0.789577000  | 0.407229000  | 0.757864000  |
| O                           | 0.936456000  | 1.806796000  | 0.826510000  |
| O                           | 1.914180000  | -0.164721000 | 1.397918000  |
| C                           | 2.666682000  | -1.126563000 | 0.682352000  |
| H                           | 2.165213000  | -2.104990000 | 0.677155000  |
| H                           | 2.846688000  | -0.805554000 | -0.348905000 |
| H                           | 3.619037000  | -1.226746000 | 1.212527000  |
| <b>TS<sub>11R/10Z</sub></b> |              |              |              |
| P                           | 1.725924000  | 1.270074000  | 0.511451000  |
| C                           | 3.570274000  | 1.030647000  | 0.675424000  |
| C                           | 4.351079000  | 1.215319000  | -0.634781000 |
| H                           | 3.734443000  | 0.018117000  | 1.052166000  |
| H                           | 3.947687000  | 1.713268000  | 1.445609000  |
| C                           | 5.779814000  | 0.669402000  | -0.546410000 |
| H                           | 3.836539000  | 0.702440000  | -1.453578000 |
| H                           | 4.379820000  | 2.277709000  | -0.909508000 |
| C                           | 6.529742000  | 0.770758000  | -1.876070000 |
| H                           | 6.331054000  | 1.204057000  | 0.240190000  |
| H                           | 5.732322000  | -0.382640000 | -0.236014000 |
| H                           | 6.013640000  | 0.194488000  | -2.653231000 |
| H                           | 6.594337000  | 1.810792000  | -2.218997000 |
| H                           | 7.550975000  | 0.382322000  | -1.792514000 |
| C                           | 1.716304000  | 3.067058000  | -0.015171000 |
| C                           | 2.634837000  | 4.018113000  | 0.760908000  |
| H                           | 0.674554000  | 3.383029000  | 0.069771000  |
| H                           | 1.941223000  | 3.086373000  | -1.085931000 |
| C                           | 2.401283000  | 5.480196000  | 0.357361000  |

|   |              |              |              |
|---|--------------|--------------|--------------|
| H | 2.465732000  | 3.920138000  | 1.842544000  |
| H | 3.688342000  | 3.769016000  | 0.590215000  |
| C | 3.310501000  | 6.453780000  | 1.110811000  |
| H | 2.561420000  | 5.583200000  | -0.724321000 |
| H | 1.349236000  | 5.740199000  | 0.535822000  |
| H | 4.368153000  | 6.235116000  | 0.919390000  |
| H | 3.123916000  | 7.490367000  | 0.809196000  |
| H | 3.149634000  | 6.386757000  | 2.193817000  |
| C | 1.178838000  | 1.209170000  | 2.274830000  |
| C | 1.428983000  | -0.141976000 | 2.957758000  |
| H | 0.117786000  | 1.464501000  | 2.297743000  |
| H | 1.720716000  | 2.010614000  | 2.789618000  |
| C | 0.791368000  | -0.242214000 | 4.350530000  |
| H | 1.033678000  | -0.939899000 | 2.322894000  |
| H | 2.509694000  | -0.316942000 | 3.042771000  |
| C | 1.341274000  | 0.764789000  | 5.364119000  |
| H | -0.295743000 | -0.116206000 | 4.257389000  |
| H | 0.947509000  | -1.260799000 | 4.728791000  |
| H | 0.900333000  | 0.609831000  | 6.354817000  |
| H | 2.429634000  | 0.667453000  | 5.463652000  |
| H | 1.126277000  | 1.797401000  | 5.067070000  |
| P | -1.239957000 | -1.718539000 | -0.737409000 |
| B | -0.902021000 | 1.598157000  | -2.747665000 |
| O | -0.493532000 | 2.212294000  | -3.915804000 |
| O | -1.886977000 | 0.657834000  | -2.946280000 |
| C | -1.430747000 | 1.802573000  | -4.944693000 |
| C | -1.982661000 | 0.444559000  | -4.373080000 |
| C | -2.505043000 | 2.891204000  | -5.031848000 |
| C | -0.683500000 | 1.685835000  | -6.267465000 |
| C | -1.093118000 | -0.757889000 | -4.705262000 |
| C | -3.434556000 | 0.135352000  | -4.717647000 |
| H | -3.220269000 | 2.690913000  | -5.836234000 |
| H | -3.055515000 | 2.973096000  | -4.089580000 |
| H | -2.020389000 | 3.852231000  | -5.228398000 |
| H | -1.345390000 | 1.307220000  | -7.054499000 |
| H | -0.318452000 | 2.671262000  | -6.573555000 |
| H | 0.175865000  | 1.017677000  | -6.181601000 |
| H | -0.040472000 | -0.532831000 | -4.510149000 |
| H | -1.384171000 | -1.591011000 | -4.059597000 |
| H | -1.193378000 | -1.061356000 | -5.752625000 |
| H | -3.566268000 | 0.035513000  | -5.801074000 |
| H | -3.725070000 | -0.809185000 | -4.247728000 |
| H | -4.105780000 | 0.914778000  | -4.351307000 |
| C | -0.168635000 | -3.125244000 | -0.185983000 |

|                             |              |              |              |
|-----------------------------|--------------|--------------|--------------|
| C                           | 0.135300000  | -3.409590000 | 1.152668000  |
| C                           | 0.369949000  | -3.947952000 | -1.185183000 |
| C                           | 0.980676000  | -4.469419000 | 1.479464000  |
| H                           | -0.303806000 | -2.810713000 | 1.943851000  |
| C                           | 1.217794000  | -5.005831000 | -0.861983000 |
| H                           | 0.138537000  | -3.739713000 | -2.226028000 |
| C                           | 1.528729000  | -5.266926000 | 0.472878000  |
| H                           | 1.207442000  | -4.677033000 | 2.522305000  |
| H                           | 1.639742000  | -5.620967000 | -1.651699000 |
| H                           | 2.188742000  | -6.091522000 | 0.728672000  |
| C                           | -2.403400000 | -1.641620000 | 0.694946000  |
| C                           | -3.588503000 | -2.380454000 | 0.588098000  |
| C                           | -2.152356000 | -0.945434000 | 1.885659000  |
| C                           | -4.494839000 | -2.435869000 | 1.648293000  |
| H                           | -3.803762000 | -2.913178000 | -0.334669000 |
| C                           | -3.057284000 | -0.994687000 | 2.943438000  |
| H                           | -1.251362000 | -0.352379000 | 1.974403000  |
| C                           | -4.231493000 | -1.742755000 | 2.829422000  |
| H                           | -5.408749000 | -3.015188000 | 1.547764000  |
| H                           | -2.848212000 | -0.445573000 | 3.858350000  |
| H                           | -4.937845000 | -1.779993000 | 3.654279000  |
| C                           | 3.902677000  | -2.896836000 | -0.922112000 |
| C                           | 3.934209000  | -2.937778000 | -2.317668000 |
| C                           | 3.069445000  | -2.124742000 | -3.052167000 |
| C                           | 2.188627000  | -1.271364000 | -2.390501000 |
| C                           | 2.155442000  | -1.209752000 | -0.987615000 |
| C                           | 3.025195000  | -2.038702000 | -0.264530000 |
| H                           | 4.552561000  | -3.547516000 | -0.343940000 |
| H                           | 4.622765000  | -3.605324000 | -2.828185000 |
| H                           | 3.082090000  | -2.153664000 | -4.138413000 |
| H                           | 1.524028000  | -0.622720000 | -2.952175000 |
| H                           | 2.972870000  | -2.045023000 | 0.818646000  |
| C                           | 1.225523000  | -0.258023000 | -0.334049000 |
| C                           | -0.157207000 | -0.239617000 | -0.455212000 |
| C                           | -0.639300000 | 1.116073000  | -0.378575000 |
| O                           | -0.336071000 | 1.918558000  | -1.555450000 |
| O                           | -1.988765000 | 1.258126000  | -0.056452000 |
| C                           | -2.321114000 | 2.510344000  | 0.505343000  |
| H                           | -1.748147000 | 2.704782000  | 1.425184000  |
| H                           | -2.134095000 | 3.330811000  | -0.200649000 |
| H                           | -3.387252000 | 2.477806000  | 0.745397000  |
| <b>TS<sub>11S/10Z</sub></b> |              |              |              |
| P                           | 1.193972000  | 0.368485000  | -0.312024000 |
| C                           | 2.674201000  | -0.759361000 | -0.588922000 |



|   |              |              |              |
|---|--------------|--------------|--------------|
| C | 2.385812000  | -1.941923000 | -1.533508000 |
| H | 2.980882000  | -1.131031000 | 0.395430000  |
| H | 3.508373000  | -0.154531000 | -0.959496000 |
| C | 3.147766000  | -3.222362000 | -1.167787000 |
| H | 1.314081000  | -2.166825000 | -1.537242000 |
| H | 2.637226000  | -1.654100000 | -2.562778000 |
| C | 4.669371000  | -3.067395000 | -1.234216000 |
| H | 2.848349000  | -3.535995000 | -0.160333000 |
| H | 2.833996000  | -4.026841000 | -1.846140000 |
| H | 4.992371000  | -2.765780000 | -2.238848000 |
| H | 5.025792000  | -2.305652000 | -0.530997000 |
| H | 5.176673000  | -4.007124000 | -0.988311000 |
| C | 2.087480000  | 1.750503000  | 0.590524000  |
| C | 1.678750000  | 3.167790000  | 0.165980000  |
| H | 3.167113000  | 1.601203000  | 0.477573000  |
| H | 1.856387000  | 1.609200000  | 1.651480000  |
| C | 1.908960000  | 4.198564000  | 1.276113000  |
| H | 2.241186000  | 3.458711000  | -0.731326000 |
| H | 0.621511000  | 3.182402000  | -0.110466000 |
| C | 1.476735000  | 5.606536000  | 0.862075000  |
| H | 1.347231000  | 3.883776000  | 2.163785000  |
| H | 2.971207000  | 4.204664000  | 1.559742000  |
| H | 2.034026000  | 5.952935000  | -0.017364000 |
| H | 0.410003000  | 5.625801000  | 0.606496000  |
| H | 1.639807000  | 6.330752000  | 1.668117000  |
| C | 0.780850000  | 0.890605000  | -2.037254000 |
| C | 1.976223000  | 1.257961000  | -2.925121000 |
| H | 0.093563000  | 1.735652000  | -1.967452000 |
| H | 0.217639000  | 0.060986000  | -2.475652000 |
| C | 1.508074000  | 1.770623000  | -4.292456000 |
| H | 2.585384000  | 2.032565000  | -2.442170000 |
| H | 2.631972000  | 0.393923000  | -3.072673000 |
| C | 2.671628000  | 2.135691000  | -5.216739000 |
| H | 0.881917000  | 1.002660000  | -4.767455000 |
| H | 0.860767000  | 2.645928000  | -4.146298000 |
| H | 3.314915000  | 1.267238000  | -5.403064000 |
| H | 2.314153000  | 2.501098000  | -6.185790000 |
| H | 3.295629000  | 2.920792000  | -4.772743000 |
| P | -2.815756000 | -1.065360000 | 0.164729000  |
| B | -0.670436000 | 1.438088000  | 2.785148000  |
| O | -1.126242000 | 0.205463000  | 3.199464000  |
| O | -0.111328000 | 2.183425000  | 3.805268000  |
| C | -1.055656000 | 0.196743000  | 4.651678000  |
| C | 0.038732000  | 1.290819000  | 4.937142000  |

|   |              |              |              |
|---|--------------|--------------|--------------|
| C | -2.438117000 | 0.591753000  | 5.180022000  |
| C | -0.700002000 | -1.213873000 | 5.103351000  |
| C | 1.465831000  | 0.736644000  | 4.878604000  |
| C | -0.164720000 | 2.088769000  | 6.219330000  |
| H | -3.181868000 | -0.120342000 | 4.811207000  |
| H | -2.465929000 | 0.577328000  | 6.273907000  |
| H | -2.720420000 | 1.592712000  | 4.838242000  |
| H | -0.565169000 | -1.249515000 | 6.190286000  |
| H | -1.510479000 | -1.898068000 | 4.834952000  |
| H | 0.208014000  | -1.574782000 | 4.618347000  |
| H | 2.170828000  | 1.573010000  | 4.873215000  |
| H | 1.688772000  | 0.096920000  | 5.738165000  |
| H | 1.620860000  | 0.154468000  | 3.965442000  |
| H | -0.134834000 | 1.430809000  | 7.094932000  |
| H | 0.635180000  | 2.828634000  | 6.321644000  |
| H | -1.117871000 | 2.621259000  | 6.211694000  |
| C | -4.073828000 | 0.226256000  | 0.523152000  |
| C | -4.983034000 | 0.740930000  | -0.409121000 |
| C | -4.167044000 | 0.648033000  | 1.859905000  |
| C | -5.946193000 | 1.672468000  | -0.016985000 |
| H | -4.932931000 | 0.423969000  | -1.445414000 |
| C | -5.125897000 | 1.580993000  | 2.249460000  |
| H | -3.467332000 | 0.250775000  | 2.586328000  |
| C | -6.020532000 | 2.098697000  | 1.309843000  |
| H | -6.640328000 | 2.068168000  | -0.753953000 |
| H | -5.176146000 | 1.901170000  | 3.287224000  |
| H | -6.772131000 | 2.823616000  | 1.609977000  |
| C | -2.910880000 | -1.288884000 | -1.666434000 |
| C | -3.246675000 | -2.557368000 | -2.158892000 |
| C | -2.604207000 | -0.266002000 | -2.579950000 |
| C | -3.270321000 | -2.806415000 | -3.533276000 |
| H | -3.485052000 | -3.353938000 | -1.458586000 |
| C | -2.627562000 | -0.515508000 | -3.951173000 |
| H | -2.348361000 | 0.718735000  | -2.202904000 |
| C | -2.957512000 | -1.786363000 | -4.431025000 |
| H | -3.530000000 | -3.795789000 | -3.900117000 |
| H | -2.384813000 | 0.282856000  | -4.648078000 |
| H | -2.969726000 | -1.979035000 | -5.500413000 |
| C | 1.503134000  | -3.523526000 | 2.501465000  |
| C | 0.922922000  | -4.678293000 | 1.973746000  |
| C | 0.025419000  | -4.567095000 | 0.909982000  |
| C | -0.287167000 | -3.318979000 | 0.374782000  |
| C | 0.281264000  | -2.145963000 | 0.900917000  |
| C | 1.180665000  | -2.275088000 | 1.972718000  |

|   |              |              |              |
|---|--------------|--------------|--------------|
| H | 2.202406000  | -3.592815000 | 3.330750000  |
| H | 1.169553000  | -5.653248000 | 2.384168000  |
| H | -0.427973000 | -5.458921000 | 0.485808000  |
| H | -0.958281000 | -3.248397000 | -0.474503000 |
| H | 1.622096000  | -1.379460000 | 2.399889000  |
| C | -0.015347000 | -0.814709000 | 0.340381000  |
| C | -1.234998000 | -0.139803000 | 0.324657000  |
| C | -0.974400000 | 1.279396000  | 0.321019000  |
| O | -0.686782000 | 1.948764000  | 1.533750000  |
| O | -1.750609000 | 2.090131000  | -0.507540000 |
| C | -2.490466000 | 3.174242000  | 0.057133000  |
| H | -3.109250000 | 3.560865000  | -0.755198000 |
| H | -3.134117000 | 2.845339000  | 0.875324000  |
| H | -1.818804000 | 3.961876000  | 0.416195000  |

**TS<sub>10Z/6R</sub>**

|   |              |              |              |
|---|--------------|--------------|--------------|
| P | 0.931741000  | -0.433106000 | -0.554008000 |
| C | 1.191898000  | 1.279233000  | -1.149463000 |
| C | 1.733708000  | 2.289845000  | -0.124679000 |
| H | 0.222953000  | 1.614743000  | -1.524856000 |
| H | 1.859990000  | 1.212135000  | -2.016063000 |
| C | 1.328407000  | 3.722142000  | -0.492330000 |
| H | 1.363743000  | 2.065186000  | 0.877699000  |
| H | 2.827662000  | 2.210196000  | -0.071914000 |
| C | 1.818177000  | 4.746041000  | 0.532108000  |
| H | 1.714228000  | 3.972036000  | -1.490366000 |
| H | 0.235970000  | 3.769713000  | -0.563511000 |
| H | 2.912171000  | 4.741369000  | 0.615288000  |
| H | 1.506806000  | 5.760854000  | 0.260863000  |
| H | 1.409774000  | 4.523727000  | 1.525554000  |
| C | 0.936188000  | -1.453864000 | -2.102466000 |
| C | -0.340179000 | -1.277411000 | -2.934625000 |
| H | 1.047335000  | -2.502859000 | -1.814668000 |
| H | 1.830823000  | -1.183362000 | -2.673585000 |
| C | -0.526997000 | -2.382214000 | -3.981381000 |
| H | -1.210878000 | -1.261908000 | -2.270506000 |
| H | -0.310170000 | -0.300495000 | -3.432999000 |
| C | 0.593845000  | -2.453778000 | -5.022208000 |
| H | -0.614881000 | -3.345884000 | -3.461387000 |
| H | -1.486128000 | -2.219579000 | -4.489014000 |
| H | 1.559276000  | -2.696228000 | -4.562727000 |
| H | 0.387058000  | -3.222115000 | -5.775188000 |
| H | 0.706957000  | -1.495744000 | -5.545534000 |
| C | 2.470698000  | -0.922490000 | 0.323834000  |
| C | 3.769299000  | -0.783879000 | -0.479044000 |

|   |              |              |              |
|---|--------------|--------------|--------------|
| H | 2.339639000  | -1.957040000 | 0.657172000  |
| H | 2.501760000  | -0.325270000 | 1.240427000  |
| C | 4.998360000  | -1.131558000 | 0.369105000  |
| H | 3.744613000  | -1.436959000 | -1.361090000 |
| H | 3.873562000  | 0.241849000  | -0.855817000 |
| C | 6.310980000  | -0.998383000 | -0.405477000 |
| H | 5.019276000  | -0.478393000 | 1.251822000  |
| H | 4.893809000  | -2.156874000 | 0.749892000  |
| H | 7.172281000  | -1.248259000 | 0.223436000  |
| H | 6.327265000  | -1.666268000 | -1.275292000 |
| H | 6.450477000  | 0.025992000  | -0.771476000 |
| P | -2.750760000 | 0.901431000  | -0.822209000 |
| B | -0.078128000 | 0.036879000  | 2.733898000  |
| O | 1.157071000  | -0.358887000 | 3.205913000  |
| O | -1.132101000 | -0.639755000 | 3.312353000  |
| C | 0.958044000  | -1.511751000 | 4.062943000  |
| C | -0.603197000 | -1.481070000 | 4.360856000  |
| C | 1.408942000  | -2.754761000 | 3.295726000  |
| C | 1.845423000  | -1.326335000 | 5.292403000  |
| C | -0.957142000 | -0.786817000 | 5.680635000  |
| C | -1.291633000 | -2.840614000 | 4.284140000  |
| H | 1.335236000  | -3.652343000 | 3.917930000  |
| H | 0.806342000  | -2.907174000 | 2.400160000  |
| H | 2.455642000  | -2.629059000 | 3.000246000  |
| H | 1.700377000  | -2.144840000 | 6.006019000  |
| H | 2.895875000  | -1.326888000 | 4.984184000  |
| H | 1.643704000  | -0.380159000 | 5.798455000  |
| H | -0.626101000 | -1.365046000 | 6.549341000  |
| H | -0.512812000 | 0.211681000  | 5.733514000  |
| H | -2.044051000 | -0.674032000 | 5.734679000  |
| H | -1.173649000 | -3.300509000 | 3.302388000  |
| H | -0.899077000 | -3.519270000 | 5.050175000  |
| H | -2.363717000 | -2.710746000 | 4.460195000  |
| C | -4.182380000 | 1.447161000  | 0.214235000  |
| C | -5.281034000 | 2.040730000  | -0.429479000 |
| C | -4.276926000 | 1.199792000  | 1.592076000  |
| C | -6.424880000 | 2.397134000  | 0.282009000  |
| H | -5.234316000 | 2.238430000  | -1.497300000 |
| C | -5.426867000 | 1.547606000  | 2.302760000  |
| H | -3.449479000 | 0.735690000  | 2.118771000  |
| C | -6.503561000 | 2.151932000  | 1.654510000  |
| H | -7.257509000 | 2.864694000  | -0.237218000 |
| H | -5.475871000 | 1.346777000  | 3.370070000  |
| H | -7.396175000 | 2.425917000  | 2.210126000  |

|                            |              |              |              |
|----------------------------|--------------|--------------|--------------|
| C                          | -2.351531000 | 2.476824000  | -1.726817000 |
| C                          | -2.598160000 | 3.772436000  | -1.244903000 |
| C                          | -1.745713000 | 2.345071000  | -2.986370000 |
| C                          | -2.209842000 | 4.891525000  | -1.979364000 |
| H                          | -3.091579000 | 3.898773000  | -0.290038000 |
| C                          | -1.340607000 | 3.463696000  | -3.716788000 |
| H                          | -1.599506000 | 1.352163000  | -3.401156000 |
| C                          | -1.566138000 | 4.742912000  | -3.210580000 |
| H                          | -2.405757000 | 5.886204000  | -1.586813000 |
| H                          | -0.864614000 | 3.334366000  | -4.685370000 |
| H                          | -1.257968000 | 5.618223000  | -3.775852000 |
| C                          | -1.112660000 | -4.328989000 | 0.467144000  |
| C                          | -2.463838000 | -4.410583000 | 0.800797000  |
| C                          | -3.161495000 | -3.220318000 | 1.020410000  |
| C                          | -2.531804000 | -1.986887000 | 0.901806000  |
| C                          | -1.169128000 | -1.869655000 | 0.544445000  |
| C                          | -0.483252000 | -3.091116000 | 0.344361000  |
| H                          | -0.533247000 | -5.234749000 | 0.303919000  |
| H                          | -2.957375000 | -5.373300000 | 0.894479000  |
| H                          | -4.213202000 | -3.248281000 | 1.294684000  |
| H                          | -3.100819000 | -1.091728000 | 1.107875000  |
| H                          | 0.575696000  | -3.089826000 | 0.110281000  |
| C                          | -0.532678000 | -0.545559000 | 0.437858000  |
| C                          | -1.387214000 | 0.692506000  | 0.396199000  |
| C                          | -1.111040000 | 1.620465000  | 1.348258000  |
| O                          | -0.224816000 | 1.392799000  | 2.334857000  |
| O                          | -1.629843000 | 2.859539000  | 1.349145000  |
| C                          | -1.752098000 | 3.530077000  | 2.608381000  |
| H                          | -0.775185000 | 3.673071000  | 3.075063000  |
| H                          | -2.205752000 | 4.494097000  | 2.374762000  |
| H                          | -2.407168000 | 2.967059000  | 3.280421000  |
| <b>TS<sub>10Z/6S</sub></b> |              |              |              |
| P                          | -0.926780000 | -1.160175000 | 0.741273000  |
| C                          | 0.090072000  | -2.531568000 | 1.423816000  |
| C                          | -0.565347000 | -3.364336000 | 2.530510000  |
| H                          | 1.015297000  | -2.061045000 | 1.771041000  |
| H                          | 0.379321000  | -3.176861000 | 0.590615000  |
| C                          | 0.410194000  | -4.390221000 | 3.118620000  |
| H                          | -0.928952000 | -2.713716000 | 3.336628000  |
| H                          | -1.445381000 | -3.889067000 | 2.136084000  |
| C                          | -0.222198000 | -5.248991000 | 4.215785000  |
| H                          | 0.783609000  | -5.034794000 | 2.310968000  |
| H                          | 1.286040000  | -3.861032000 | 3.517626000  |
| H                          | -0.576868000 | -4.628182000 | 5.047465000  |

|   |              |              |              |
|---|--------------|--------------|--------------|
| H | -1.082274000 | -5.810297000 | 3.831006000  |
| H | 0.494422000  | -5.971661000 | 4.620772000  |
| C | -1.271883000 | -0.060786000 | 2.165167000  |
| C | -0.060010000 | 0.238534000  | 3.066384000  |
| H | -2.075451000 | -0.517716000 | 2.748469000  |
| H | -1.677114000 | 0.861635000  | 1.745555000  |
| C | -0.203825000 | 1.590569000  | 3.773198000  |
| H | 0.050888000  | -0.561327000 | 3.810452000  |
| H | 0.863922000  | 0.254196000  | 2.486413000  |
| C | 1.010725000  | 1.918915000  | 4.642528000  |
| H | -0.330230000 | 2.368906000  | 3.010938000  |
| H | -1.120268000 | 1.599210000  | 4.379799000  |
| H | 0.900950000  | 2.892109000  | 5.134073000  |
| H | 1.158864000  | 1.164080000  | 5.424750000  |
| H | 1.921692000  | 1.948497000  | 4.032955000  |
| C | -2.548221000 | -1.942521000 | 0.243577000  |
| C | -3.667645000 | -1.979305000 | 1.292333000  |
| H | -2.326814000 | -2.961102000 | -0.095899000 |
| H | -2.863450000 | -1.385198000 | -0.643802000 |
| C | -4.912465000 | -2.736980000 | 0.801819000  |
| H | -3.306125000 | -2.458483000 | 2.209879000  |
| H | -3.951470000 | -0.955771000 | 1.559909000  |
| C | -5.613328000 | -2.086316000 | -0.394113000 |
| H | -4.628913000 | -3.767441000 | 0.545331000  |
| H | -5.621621000 | -2.813221000 | 1.636577000  |
| H | -5.926466000 | -1.063024000 | -0.156496000 |
| H | -4.962957000 | -2.039160000 | -1.273980000 |
| H | -6.508584000 | -2.650087000 | -0.677742000 |
| P | -1.793122000 | 1.901017000  | -1.382342000 |
| B | 2.278743000  | 0.307043000  | 0.050509000  |
| O | 2.879427000  | -0.686482000 | 0.792329000  |
| O | 2.768630000  | 0.425971000  | -1.226988000 |
| C | 3.741145000  | -1.435743000 | -0.109026000 |
| C | 3.914102000  | -0.451138000 | -1.339201000 |
| C | 5.031053000  | -1.750993000 | 0.643671000  |
| C | 3.030880000  | -2.738233000 | -0.478563000 |
| C | 3.880613000  | -1.126597000 | -2.705881000 |
| C | 5.149483000  | 0.448256000  | -1.223762000 |
| H | 4.805707000  | -2.407059000 | 1.490509000  |
| H | 5.744301000  | -2.268923000 | -0.006936000 |
| H | 5.503766000  | -0.847208000 | 1.033362000  |
| H | 2.092243000  | -2.548261000 | -1.001528000 |
| H | 3.663330000  | -3.359353000 | -1.120686000 |
| H | 2.818261000  | -3.301220000 | 0.435363000  |

|   |              |              |              |
|---|--------------|--------------|--------------|
| H | 2.946494000  | -1.664368000 | -2.869839000 |
| H | 3.963974000  | -0.364456000 | -3.486659000 |
| H | 4.721922000  | -1.820534000 | -2.815329000 |
| H | 5.107690000  | 1.203332000  | -2.014262000 |
| H | 5.170332000  | 0.968139000  | -0.261022000 |
| H | 6.078853000  | -0.119407000 | -1.335600000 |
| C | -2.959851000 | 2.271518000  | 0.012106000  |
| C | -4.120957000 | 1.489816000  | 0.087793000  |
| C | -2.715978000 | 3.208137000  | 1.032708000  |
| C | -5.003938000 | 1.613369000  | 1.164268000  |
| H | -4.331080000 | 0.778372000  | -0.706206000 |
| C | -3.595161000 | 3.331902000  | 2.106571000  |
| H | -1.825408000 | 3.822636000  | 0.985265000  |
| C | -4.738235000 | 2.529846000  | 2.180296000  |
| H | -5.899316000 | 0.998364000  | 1.204739000  |
| H | -3.387559000 | 4.053579000  | 2.892446000  |
| H | -5.420255000 | 2.627576000  | 3.020540000  |
| C | -1.248019000 | 3.586196000  | -1.896919000 |
| C | -2.137537000 | 4.670313000  | -1.885304000 |
| C | 0.028433000  | 3.781035000  | -2.449943000 |
| C | -1.756112000 | 5.915538000  | -2.386726000 |
| H | -3.133274000 | 4.544652000  | -1.470828000 |
| C | 0.408825000  | 5.023849000  | -2.951921000 |
| H | 0.740018000  | 2.961084000  | -2.464568000 |
| C | -0.480710000 | 6.100003000  | -2.920200000 |
| H | -2.459759000 | 6.743639000  | -2.358033000 |
| H | 1.405344000  | 5.152483000  | -3.367148000 |
| H | -0.183516000 | 7.069556000  | -3.310222000 |
| C | -0.020810000 | -2.892590000 | -3.351048000 |
| C | 0.339492000  | -2.114940000 | -4.450807000 |
| C | 0.533461000  | -0.744895000 | -4.254424000 |
| C | 0.382338000  | -0.172901000 | -2.997656000 |
| C | 0.010836000  | -0.933453000 | -1.862720000 |
| C | -0.188578000 | -2.315874000 | -2.093353000 |
| H | -0.184121000 | -3.961564000 | -3.467615000 |
| H | 0.462902000  | -2.561683000 | -5.432878000 |
| H | 0.818370000  | -0.110922000 | -5.090742000 |
| H | 0.578186000  | 0.883211000  | -2.872093000 |
| H | -0.483225000 | -2.969619000 | -1.279782000 |
| C | -0.114875000 | -0.280701000 | -0.553611000 |
| C | -0.332378000 | 1.199702000  | -0.503428000 |
| C | 0.560939000  | 1.930966000  | 0.206025000  |
| O | 1.694653000  | 1.401016000  | 0.717616000  |
| O | 0.370167000  | 3.220064000  | 0.551629000  |

|                             |              |              |              |
|-----------------------------|--------------|--------------|--------------|
| C                           | 1.533512000  | 4.053062000  | 0.639870000  |
| H                           | 2.082034000  | 4.046987000  | -0.306694000 |
| H                           | 1.153875000  | 5.056494000  | 0.834522000  |
| H                           | 2.187037000  | 3.725935000  | 1.451825000  |
| <b>TS<sub>11R/12R</sub></b> |              |              |              |
| P                           | -0.917498000 | -0.875490000 | 1.363331000  |
| C                           | -2.449104000 | -0.615367000 | 2.358917000  |
| C                           | -2.274528000 | 0.438723000  | 3.462329000  |
| H                           | -2.782197000 | -1.571997000 | 2.778138000  |
| H                           | -3.211610000 | -0.286248000 | 1.645370000  |
| C                           | -3.611209000 | 0.976475000  | 3.980019000  |
| H                           | -1.705513000 | 0.007156000  | 4.295791000  |
| H                           | -1.672487000 | 1.274033000  | 3.088731000  |
| C                           | -3.435910000 | 2.018570000  | 5.086475000  |
| H                           | -4.164121000 | 1.417471000  | 3.139495000  |
| H                           | -4.223716000 | 0.141402000  | 4.347416000  |
| H                           | -4.402222000 | 2.396139000  | 5.437752000  |
| H                           | -2.908060000 | 1.594585000  | 5.949183000  |
| H                           | -2.851386000 | 2.875005000  | 4.729180000  |
| C                           | -1.166703000 | -2.495033000 | 0.536927000  |
| C                           | -2.273219000 | -2.516278000 | -0.519413000 |
| H                           | -1.378809000 | -3.205944000 | 1.345292000  |
| H                           | -0.206087000 | -2.765316000 | 0.091255000  |
| C                           | -2.327621000 | -3.838305000 | -1.295825000 |
| H                           | -3.247371000 | -2.320530000 | -0.052521000 |
| H                           | -2.099526000 | -1.706476000 | -1.226010000 |
| C                           | -2.657971000 | -5.059641000 | -0.434157000 |
| H                           | -3.079342000 | -3.730195000 | -2.086609000 |
| H                           | -1.364394000 | -3.987553000 | -1.801475000 |
| H                           | -1.882388000 | -5.250889000 | 0.316680000  |
| H                           | -3.608752000 | -4.922047000 | 0.096683000  |
| H                           | -2.746575000 | -5.963311000 | -1.047078000 |
| C                           | 0.438900000  | -1.092025000 | 2.575430000  |
| C                           | 0.226508000  | -2.237388000 | 3.573613000  |
| H                           | 0.558663000  | -0.134779000 | 3.090868000  |
| H                           | 1.348003000  | -1.232099000 | 1.988638000  |
| C                           | 1.367782000  | -2.311169000 | 4.595234000  |
| H                           | -0.725240000 | -2.117542000 | 4.108319000  |
| H                           | 0.163654000  | -3.194221000 | 3.039685000  |
| C                           | 1.192002000  | -3.459367000 | 5.591004000  |
| H                           | 2.320201000  | -2.422113000 | 4.060502000  |
| H                           | 1.429170000  | -1.356015000 | 5.134216000  |
| H                           | 1.159086000  | -4.426912000 | 5.075821000  |
| H                           | 2.016623000  | -3.492272000 | 6.311176000  |



|   |              |              |              |
|---|--------------|--------------|--------------|
| H | 0.258204000  | -3.352780000 | 6.156481000  |
| P | -0.818066000 | 0.825243000  | -2.714084000 |
| B | 1.618311000  | 1.298346000  | 0.600603000  |
| O | 2.578948000  | 0.766823000  | 1.448719000  |
| O | 2.161082000  | 2.211384000  | -0.286682000 |
| C | 3.811479000  | 1.499735000  | 1.244671000  |
| C | 3.597620000  | 2.202827000  | -0.158252000 |
| C | 3.914088000  | 2.488364000  | 2.411888000  |
| C | 4.977044000  | 0.517453000  | 1.291727000  |
| C | 4.169569000  | 1.433827000  | -1.350792000 |
| C | 4.076011000  | 3.653428000  | -0.218936000 |
| H | 4.837466000  | 3.075205000  | 2.372384000  |
| H | 3.062708000  | 3.175436000  | 2.418499000  |
| H | 3.900359000  | 1.926308000  | 3.350735000  |
| H | 4.877891000  | -0.261204000 | 0.533239000  |
| H | 5.928685000  | 1.036716000  | 1.133146000  |
| H | 5.011070000  | 0.035951000  | 2.274264000  |
| H | 3.852622000  | 1.932213000  | -2.271934000 |
| H | 5.264304000  | 1.415676000  | -1.328972000 |
| H | 3.798641000  | 0.410307000  | -1.389715000 |
| H | 3.844095000  | 4.066938000  | -1.205315000 |
| H | 3.582482000  | 4.274344000  | 0.531325000  |
| H | 5.160057000  | 3.716498000  | -0.071795000 |
| C | -2.499764000 | 0.063693000  | -2.895577000 |
| C | -3.587336000 | 0.280723000  | -2.031266000 |
| C | -2.658836000 | -0.852000000 | -3.946814000 |
| C | -4.786139000 | -0.406475000 | -2.209617000 |
| H | -3.471229000 | 0.967930000  | -1.202600000 |
| C | -3.856789000 | -1.548824000 | -4.121525000 |
| H | -1.830341000 | -1.021712000 | -4.629716000 |
| C | -4.923912000 | -1.328414000 | -3.251307000 |
| H | -5.615664000 | -0.229069000 | -1.529390000 |
| H | -3.956329000 | -2.257536000 | -4.939374000 |
| H | -5.857931000 | -1.867702000 | -3.384010000 |
| C | -1.200896000 | 2.613801000  | -2.475638000 |
| C | -0.146282000 | 3.450548000  | -2.069303000 |
| C | -2.429153000 | 3.204976000  | -2.806544000 |
| C | -0.330765000 | 4.827306000  | -1.956522000 |
| H | 0.813781000  | 3.019383000  | -1.808048000 |
| C | -2.609594000 | 4.585412000  | -2.697074000 |
| H | -3.253575000 | 2.588313000  | -3.147483000 |
| C | -1.565508000 | 5.403115000  | -2.264747000 |
| H | 0.495512000  | 5.450721000  | -1.623758000 |
| H | -3.572645000 | 5.020965000  | -2.952064000 |

|                          |              |              |              |
|--------------------------|--------------|--------------|--------------|
| H                        | -1.709144000 | 6.476789000  | -2.178221000 |
| C                        | 3.487298000  | -2.829438000 | -2.151214000 |
| C                        | 2.842509000  | -3.428900000 | -3.237330000 |
| C                        | 1.521458000  | -3.078169000 | -3.524604000 |
| C                        | 0.863621000  | -2.114677000 | -2.763491000 |
| C                        | 1.505839000  | -1.469590000 | -1.680060000 |
| C                        | 2.819191000  | -1.890783000 | -1.372360000 |
| H                        | 4.504378000  | -3.117361000 | -1.896322000 |
| H                        | 3.354986000  | -4.176660000 | -3.836240000 |
| H                        | 1.000204000  | -3.556552000 | -4.350457000 |
| H                        | -0.167695000 | -1.868784000 | -2.988577000 |
| H                        | 3.288444000  | -1.476146000 | -0.485690000 |
| C                        | 0.823974000  | -0.553424000 | -0.789504000 |
| C                        | -0.206666000 | 0.274097000  | -1.051794000 |
| C                        | -0.711930000 | 0.778046000  | 0.312109000  |
| O                        | 0.271387000  | 1.470888000  | 1.005669000  |
| O                        | -1.928070000 | 1.452423000  | 0.338132000  |
| C                        | -1.955794000 | 2.828093000  | 0.738159000  |
| H                        | -1.146674000 | 3.392270000  | 0.278971000  |
| H                        | -2.912830000 | 3.208448000  | 0.377662000  |
| H                        | -1.903868000 | 2.924043000  | 1.827742000  |
| <b>TS<sub>1/7E</sub></b> |              |              |              |
| P                        | -0.151398000 | -0.142104000 | -1.074028000 |
| B                        | -0.073506000 | 1.044233000  | 0.458606000  |
| O                        | -1.114319000 | 1.821796000  | 0.858742000  |
| O                        | 1.095483000  | 1.248817000  | 1.114940000  |
| C                        | -0.673560000 | 2.525207000  | 2.073335000  |
| C                        | 0.898363000  | 2.409193000  | 1.986509000  |
| C                        | -1.216218000 | 3.947647000  | 2.003425000  |
| C                        | -1.279305000 | 1.781457000  | 3.260750000  |
| C                        | 1.591783000  | 2.127237000  | 3.312757000  |
| C                        | 1.562860000  | 3.583041000  | 1.264054000  |
| H                        | -2.309348000 | 3.921373000  | 2.038751000  |
| H                        | -0.863053000 | 4.534274000  | 2.858417000  |
| H                        | -0.915813000 | 4.454696000  | 1.083998000  |
| H                        | -2.365046000 | 1.737848000  | 3.135441000  |
| H                        | -0.910262000 | 0.758974000  | 3.333596000  |
| H                        | -1.060588000 | 2.301796000  | 4.198586000  |
| H                        | 1.244205000  | 1.190270000  | 3.750834000  |
| H                        | 2.670985000  | 2.049009000  | 3.149102000  |
| H                        | 1.412376000  | 2.943159000  | 4.021471000  |
| H                        | 2.612784000  | 3.336661000  | 1.082314000  |
| H                        | 1.087756000  | 3.774147000  | 0.296767000  |
| H                        | 1.518682000  | 4.498867000  | 1.861604000  |

|                          |              |                 |                 |
|--------------------------|--------------|-----------------|-----------------|
| C                        | 1.593340000  | -0.532019000    | -1.466979000    |
| C                        | 2.170823000  | -1.732783000    | -1.036411000    |
| C                        | 2.378603000  | 0.396500000     | -2.165770000    |
| C                        | 3.511701000  | -2.003014000    | -1.308807000    |
| H                        | 1.576341000  | -2.450536000    | -0.482488000    |
| C                        | 3.717935000  | 0.123092000     | -2.435033000    |
| H                        | 1.941120000  | 1.330348000     | -2.504378000    |
| C                        | 4.287083000  | -1.078161000    | -2.008153000    |
| H                        | 3.948453000  | -2.939074000    | -0.972997000    |
| H                        | 4.317128000  | 0.849312000     | -2.977017000    |
| H                        | 5.331247000  | -1.290983000    | -2.219114000    |
| C                        | -0.760023000 | 0.773806000     | -2.535090000    |
| C                        | -0.497474000 | 0.305498000     | -3.834894000    |
| C                        | -1.625852000 | 1.866567000     | -2.358775000    |
| C                        | -1.072955000 | 0.934101000     | -4.934701000    |
| H                        | 0.163902000  | -0.542520000    | -3.977197000    |
| C                        | -2.196642000 | 2.491543000     | -3.467018000    |
| H                        | -1.849155000 | 2.224135000     | -1.358654000    |
| C                        | -1.922651000 | 2.029806000     | -4.755020000    |
| H                        | -0.857127000 | 0.572000000     | -5.936223000    |
| H                        | -2.856359000 | 3.342630000     | -3.322538000    |
| H                        | -2.369677000 | 2.518524000     | -5.615958000    |
| C                        | -1.652877000 | -1.695261000    | 4.691614000     |
| C                        | -0.397959000 | -1.647613000    | 5.307990000     |
| C                        | 0.745211000  | -1.631713000    | 4.500530000     |
| C                        | 0.649332000  | -1.635216000    | 3.115336000     |
| C                        | -0.622457000 | -1.692807000    | 2.474632000     |
| C                        | -1.776061000 | -1.735941000    | 3.309337000     |
| H                        | -2.554100000 | -1.717591000    | 5.299935000     |
| H                        | -0.312062000 | -1.629143000    | 6.389968000     |
| H                        | 1.731228000  | -1.597232000    | 4.958631000     |
| H                        | 1.542908000  | -1.577440000    | 2.501856000     |
| H                        | -2.755618000 | -1.790923000    | 2.845452000     |
| C                        | -0.735138000 | -1.657800000    | 1.091093000     |
| C                        | -0.862958000 | -1.709561000    | -0.189997000    |
| C                        | -1.287953000 | -2.800943000    | -1.099922000    |
| O                        | -1.757939000 | -3.867664000    | -0.774864000    |
| O                        | -1.072063000 | -2.448743000    | -2.401482000    |
| C                        | -1.456888000 | -3.422945000    | -3.375540000    |
| H                        | -0.862889000 | -4.334074000    | -3.261812000    |
| H                        | -2.514985000 | -3.674581000    | -3.266766000    |
| H                        | -1.270377000 | -2.960253000    | -4.345364000    |
| <b>TS<sub>1/S1</sub></b> |              |                 |                 |
| P                        |              | -0.082992000000 | -0.439359000000 |
|                          |              |                 | 0.273776000000  |

|   |                 |                 |                 |
|---|-----------------|-----------------|-----------------|
| B | -0.905669000000 | 1.295172000000  | 0.207466000000  |
| O | -0.190744000000 | 2.412251000000  | 0.486554000000  |
| O | -2.175130000000 | 1.503393000000  | -0.234830000000 |
| C | -1.115059000000 | 3.547252000000  | 0.347226000000  |
| C | -2.282468000000 | 2.943154000000  | -0.521170000000 |
| C | -1.534765000000 | 3.915312000000  | 1.771154000000  |
| C | -0.369320000000 | 4.695104000000  | -0.318369000000 |
| C | -2.074489000000 | 3.092992000000  | -2.028219000000 |
| C | -3.679123000000 | 3.398440000000  | -0.119602000000 |
| H | -2.066242000000 | 3.091365000000  | 2.257319000000  |
| H | -0.637596000000 | 4.132729000000  | 2.357598000000  |
| H | -2.178421000000 | 4.800457000000  | 1.780619000000  |
| H | 0.116075000000  | 4.363317000000  | -1.237040000000 |
| H | -1.059117000000 | 5.516487000000  | -0.542268000000 |
| H | 0.397715000000  | 5.077852000000  | 0.362705000000  |
| H | -1.079199000000 | 2.760979000000  | -2.336005000000 |
| H | -2.824950000000 | 2.487003000000  | -2.545415000000 |
| H | -2.205894000000 | 4.135044000000  | -2.337198000000 |
| H | -3.904544000000 | 3.155463000000  | 0.920829000000  |
| H | -3.781346000000 | 4.480346000000  | -0.257396000000 |
| H | -4.420444000000 | 2.905395000000  | -0.755512000000 |
| C | 1.061816000000  | -0.441175000000 | 1.693938000000  |
| C | 0.687417000000  | -0.964944000000 | 2.940863000000  |
| C | 2.339755000000  | 0.115693000000  | 1.532147000000  |
| C | 1.583126000000  | -0.940884000000 | 4.008168000000  |
| H | -0.299803000000 | -1.394662000000 | 3.074360000000  |
| C | 3.225003000000  | 0.144418000000  | 2.609368000000  |
| H | 2.642673000000  | 0.529614000000  | 0.576506000000  |
| C | 2.853622000000  | -0.385441000000 | 3.845582000000  |
| H | 1.285337000000  | -1.352388000000 | 4.968602000000  |
| H | 4.211994000000  | 0.578201000000  | 2.475771000000  |
| H | 3.550334000000  | -0.366997000000 | 4.678974000000  |
| C | -1.316114000000 | -1.738949000000 | 0.549760000000  |
| C | -2.669966000000 | -1.546007000000 | 0.227392000000  |
| C | -0.872952000000 | -3.024574000000 | 0.910032000000  |
| C | -3.558846000000 | -2.618908000000 | 0.280352000000  |
| H | -3.021348000000 | -0.563825000000 | -0.067231000000 |
| C | -1.768223000000 | -4.087962000000 | 0.961283000000  |
| H | 0.175536000000  | -3.195474000000 | 1.128093000000  |
| C | -3.114496000000 | -3.889759000000 | 0.646988000000  |
| H | -4.604748000000 | -2.458187000000 | 0.033780000000  |
| H | -1.410079000000 | -5.076051000000 | 1.235079000000  |
| H | -3.811150000000 | -4.722475000000 | 0.682475000000  |
| C | -0.205338000000 | -4.120472000000 | -2.521478000000 |

|                           |                 |                 |                 |
|---------------------------|-----------------|-----------------|-----------------|
| C                         | 0.774718000000  | -4.955296000000 | -1.981143000000 |
| C                         | 1.873377000000  | -4.399586000000 | -1.322936000000 |
| C                         | 1.989250000000  | -3.015402000000 | -1.199680000000 |
| C                         | 1.008611000000  | -2.170823000000 | -1.740741000000 |
| C                         | -0.091883000000 | -2.737564000000 | -2.398910000000 |
| H                         | -1.064452000000 | -4.547513000000 | -3.030961000000 |
| H                         | 0.682359000000  | -6.033980000000 | -2.072285000000 |
| H                         | 2.641228000000  | -5.044347000000 | -0.904026000000 |
| H                         | 2.835335000000  | -2.573868000000 | -0.682147000000 |
| H                         | -0.860427000000 | -2.084216000000 | -2.799993000000 |
| C                         | 1.097864000000  | -0.719974000000 | -1.534102000000 |
| C                         | 1.683906000000  | 0.290476000000  | -2.042480000000 |
| C                         | 1.849465000000  | 1.687735000000  | -1.917962000000 |
| O                         | 1.165523000000  | 2.564990000000  | -2.444384000000 |
| O                         | 2.958526000000  | 1.985876000000  | -1.158402000000 |
| C                         | 3.178429000000  | 3.377311000000  | -0.920736000000 |
| H                         | 3.142996000000  | 3.944649000000  | -1.853916000000 |
| H                         | 2.423267000000  | 3.769841000000  | -0.233469000000 |
| H                         | 4.169164000000  | 3.446203000000  | -0.467539000000 |
| <b>TS<sub>1/82S</sub></b> |                 |                 |                 |
| P                         | 1.720691000000  | -0.179884000000 | 2.075687000000  |
| C                         | 1.742451000000  | -0.962397000000 | 3.745620000000  |
| C                         | 1.744790000000  | -2.496570000000 | 3.689118000000  |
| H                         | 0.836955000000  | -0.618518000000 | 4.259392000000  |
| H                         | 2.601617000000  | -0.585976000000 | 4.317636000000  |
| C                         | 1.605433000000  | -3.124018000000 | 5.079844000000  |
| H                         | 0.925480000000  | -2.837923000000 | 3.046329000000  |
| H                         | 2.672327000000  | -2.852190000000 | 3.221210000000  |
| C                         | 1.562356000000  | -4.652823000000 | 5.035793000000  |
| H                         | 2.437909000000  | -2.792219000000 | 5.715664000000  |
| H                         | 0.690609000000  | -2.741091000000 | 5.553934000000  |
| H                         | 2.476957000000  | -5.060205000000 | 4.588747000000  |
| H                         | 1.462532000000  | -5.079376000000 | 6.039773000000  |
| H                         | 0.715601000000  | -5.005122000000 | 4.434739000000  |
| C                         | 3.356294000000  | -0.562987000000 | 1.313570000000  |
| C                         | 3.595713000000  | 0.187952000000  | -0.006002000000 |
| H                         | 3.370752000000  | -1.645770000000 | 1.138832000000  |
| H                         | 4.153336000000  | -0.348065000000 | 2.039060000000  |
| C                         | 4.817603000000  | -0.344724000000 | -0.761390000000 |
| H                         | 2.713558000000  | 0.109965000000  | -0.648901000000 |
| H                         | 3.723310000000  | 1.259420000000  | 0.189364000000  |
| C                         | 5.002668000000  | 0.336667000000  | -2.118242000000 |
| H                         | 5.717375000000  | -0.214704000000 | -0.143125000000 |
| H                         | 4.701311000000  | -1.428126000000 | -0.909074000000 |

|   |                 |                 |                 |
|---|-----------------|-----------------|-----------------|
| H | 5.108924000000  | 1.421170000000  | -2.005431000000 |
| H | 5.891628000000  | -0.042899000000 | -2.634369000000 |
| H | 4.130893000000  | 0.159898000000  | -2.756788000000 |
| C | 1.762186000000  | 1.640088000000  | 2.390507000000  |
| C | 0.515076000000  | 2.208467000000  | 3.094156000000  |
| H | 1.905191000000  | 2.130516000000  | 1.421494000000  |
| H | 2.666683000000  | 1.830387000000  | 2.984495000000  |
| C | -0.648371000000 | 2.515699000000  | 2.145676000000  |
| H | 0.173384000000  | 1.525129000000  | 3.882905000000  |
| H | 0.807017000000  | 3.132291000000  | 3.610795000000  |
| C | -1.904116000000 | 2.957156000000  | 2.897260000000  |
| H | -0.338873000000 | 3.306234000000  | 1.450724000000  |
| H | -0.872233000000 | 1.643001000000  | 1.526439000000  |
| H | -2.721527000000 | 3.177890000000  | 2.202573000000  |
| H | -2.248505000000 | 2.172983000000  | 3.581166000000  |
| H | -1.718086000000 | 3.859567000000  | 3.493143000000  |
| P | 0.699129000000  | 0.301248000000  | -2.836321000000 |
| B | -0.862040000000 | 0.041675000000  | -1.610972000000 |
| O | -1.767214000000 | 1.124774000000  | -1.543973000000 |
| O | -1.578078000000 | -1.169928000000 | -1.787629000000 |
| C | -3.109470000000 | 0.621584000000  | -1.455000000000 |
| C | -2.975975000000 | -0.874209000000 | -1.961166000000 |
| C | -3.565217000000 | 0.745849000000  | 0.004833000000  |
| C | -3.998460000000 | 1.507707000000  | -2.328696000000 |
| C | -3.300817000000 | -1.041374000000 | -3.449769000000 |
| C | -3.773598000000 | -1.891044000000 | -1.143871000000 |
| H | -2.942983000000 | 0.147120000000  | 0.669873000000  |
| H | -3.470870000000 | 1.794099000000  | 0.306866000000  |
| H | -4.610300000000 | 0.441885000000  | 0.134407000000  |
| H | -3.995884000000 | 2.526341000000  | -1.926390000000 |
| H | -3.631019000000 | 1.550744000000  | -3.355115000000 |
| H | -5.033640000000 | 1.147006000000  | -2.335681000000 |
| H | -3.026730000000 | -2.056231000000 | -3.755292000000 |
| H | -4.368329000000 | -0.897107000000 | -3.649050000000 |
| H | -2.730349000000 | -0.343245000000 | -4.064072000000 |
| H | -3.462413000000 | -1.892857000000 | -0.096479000000 |
| H | -4.849155000000 | -1.685380000000 | -1.193240000000 |
| H | -3.601784000000 | -2.894315000000 | -1.547442000000 |
| C | 1.363288000000  | 1.966605000000  | -2.373192000000 |
| C | 0.948565000000  | 2.689595000000  | -1.242661000000 |
| C | 2.406233000000  | 2.501366000000  | -3.149213000000 |
| C | 1.579281000000  | 3.884673000000  | -0.887095000000 |
| H | 0.115722000000  | 2.327760000000  | -0.655148000000 |
| C | 3.024877000000  | 3.701799000000  | -2.805329000000 |

|                           |                 |                 |                 |
|---------------------------|-----------------|-----------------|-----------------|
| H                         | 2.739577000000  | 1.961635000000  | -4.031978000000 |
| C                         | 2.621874000000  | 4.394761000000  | -1.661342000000 |
| H                         | 1.239007000000  | 4.430148000000  | -0.009308000000 |
| H                         | 3.827319000000  | 4.093161000000  | -3.425741000000 |
| H                         | 3.107886000000  | 5.326588000000  | -1.384462000000 |
| C                         | -0.216605000000 | 0.714919000000  | -4.385783000000 |
| C                         | -0.249477000000 | -0.226092000000 | -5.424058000000 |
| C                         | -0.947419000000 | 1.904755000000  | -4.536021000000 |
| C                         | -1.000823000000 | 0.004336000000  | -6.578306000000 |
| H                         | 0.314428000000  | -1.149598000000 | -5.319781000000 |
| C                         | -1.689862000000 | 2.141261000000  | -5.691707000000 |
| H                         | -0.945639000000 | 2.631481000000  | -3.731048000000 |
| C                         | -1.723034000000 | 1.189726000000  | -6.715276000000 |
| H                         | -1.019122000000 | -0.740041000000 | -7.370354000000 |
| H                         | -2.251679000000 | 3.066788000000  | -5.792275000000 |
| H                         | -2.306207000000 | 1.374065000000  | -7.613696000000 |
| C                         | -3.324616000000 | -1.840605000000 | 6.059591000000  |
| C                         | -4.441379000000 | -1.001782000000 | 6.044967000000  |
| C                         | -4.677490000000 | -0.173312000000 | 4.945384000000  |
| C                         | -3.801760000000 | -0.174579000000 | 3.863876000000  |
| C                         | -2.671112000000 | -1.012969000000 | 3.875453000000  |
| C                         | -2.443208000000 | -1.850805000000 | 4.983046000000  |
| H                         | -3.141701000000 | -2.489518000000 | 6.911084000000  |
| H                         | -5.127635000000 | -0.996212000000 | 6.886699000000  |
| H                         | -5.548305000000 | 0.475386000000  | 4.929643000000  |
| H                         | -3.979851000000 | 0.462063000000  | 3.004113000000  |
| H                         | -1.578215000000 | -2.506463000000 | 4.981424000000  |
| C                         | -1.762158000000 | -1.014458000000 | 2.780238000000  |
| C                         | -0.996273000000 | -1.013242000000 | 1.839755000000  |
| C                         | -0.012403000000 | -0.981138000000 | 0.770363000000  |
| O                         | -0.050062000000 | -0.069711000000 | -0.137548000000 |
| O                         | 0.373436000000  | -2.260713000000 | 0.506072000000  |
| C                         | 1.029174000000  | -2.528637000000 | -0.746637000000 |
| H                         | 1.815021000000  | -1.800956000000 | -0.950570000000 |
| H                         | 1.452088000000  | -3.528082000000 | -0.633855000000 |
| H                         | 0.294294000000  | -2.501278000000 | -1.551469000000 |
| <b>TS<sub>1/84S</sub></b> |                 |                 |                 |
| P                         | -0.936592000000 | -0.589876000000 | -0.106186000000 |
| B                         | -0.569434000000 | 1.197345000000  | 0.846439000000  |
| O                         | 0.619257000000  | 1.833588000000  | 0.374599000000  |
| O                         | -1.625121000000 | 2.142439000000  | 0.886276000000  |
| C                         | 0.229446000000  | 3.112894000000  | -0.157890000000 |
| C                         | -1.037142000000 | 3.447090000000  | 0.703594000000  |
| C                         | 1.396754000000  | 4.079861000000  | 0.013362000000  |

|   |                 |                 |                 |
|---|-----------------|-----------------|-----------------|
| C | -0.100967000000 | 2.945147000000  | -1.646931000000 |
| C | -2.061730000000 | 4.348213000000  | 0.023318000000  |
| C | -0.677585000000 | 3.999143000000  | 2.088608000000  |
| H | 1.744310000000  | 4.101420000000  | 1.048456000000  |
| H | 2.232674000000  | 3.764244000000  | -0.620861000000 |
| H | 1.113224000000  | 5.095624000000  | -0.285576000000 |
| H | -0.329703000000 | 3.906075000000  | -2.119952000000 |
| H | 0.758828000000  | 2.503191000000  | -2.158074000000 |
| H | -0.953758000000 | 2.275255000000  | -1.788270000000 |
| H | -1.627267000000 | 5.326098000000  | -0.214298000000 |
| H | -2.436027000000 | 3.897924000000  | -0.898817000000 |
| H | -2.912958000000 | 4.509308000000  | 0.692920000000  |
| H | 0.072298000000  | 3.368308000000  | 2.574374000000  |
| H | -0.295252000000 | 5.024269000000  | 2.033262000000  |
| H | -1.577052000000 | 3.998841000000  | 2.711946000000  |
| C | -2.688772000000 | -1.080261000000 | -0.186731000000 |
| C | -3.054083000000 | -2.421077000000 | -0.403106000000 |
| C | -3.692730000000 | -0.127442000000 | 0.059101000000  |
| C | -4.395555000000 | -2.797080000000 | -0.399625000000 |
| H | -2.282849000000 | -3.168850000000 | -0.566875000000 |
| C | -5.033317000000 | -0.514614000000 | 0.074402000000  |
| H | -3.411054000000 | 0.903723000000  | 0.246894000000  |
| C | -5.388442000000 | -1.843826000000 | -0.159425000000 |
| H | -4.666360000000 | -3.834914000000 | -0.573424000000 |
| H | -5.803524000000 | 0.227863000000  | 0.265191000000  |
| H | -6.434016000000 | -2.138992000000 | -0.149440000000 |
| C | -0.200491000000 | -0.854603000000 | -1.741441000000 |
| C | -0.842183000000 | -1.521124000000 | -2.799189000000 |
| C | 1.119824000000  | -0.399288000000 | -1.925839000000 |
| C | -0.175329000000 | -1.732609000000 | -4.004092000000 |
| H | -1.864632000000 | -1.864722000000 | -2.682716000000 |
| C | 1.782882000000  | -0.622635000000 | -3.129531000000 |
| H | 1.606364000000  | 0.151388000000  | -1.133328000000 |
| C | 1.139891000000  | -1.292278000000 | -4.172150000000 |
| H | -0.685858000000 | -2.242905000000 | -4.816533000000 |
| H | 2.803963000000  | -0.269894000000 | -3.247576000000 |
| H | 1.656741000000  | -1.466563000000 | -5.111775000000 |
| C | 5.931663000000  | -1.461919000000 | -0.400194000000 |
| C | 6.196280000000  | -0.195164000000 | -0.926623000000 |
| C | 5.271826000000  | 0.839862000000  | -0.757761000000 |
| C | 4.086619000000  | 0.614664000000  | -0.066228000000 |
| C | 3.813015000000  | -0.665514000000 | 0.460198000000  |
| C | 4.746976000000  | -1.702557000000 | 0.289136000000  |
| H | 6.650063000000  | -2.265872000000 | -0.531384000000 |



|                            |                 |                 |                 |
|----------------------------|-----------------|-----------------|-----------------|
| H                          | 7.121173000000  | -0.014713000000 | -1.466813000000 |
| H                          | 5.477663000000  | 1.825610000000  | -1.165116000000 |
| H                          | 3.351173000000  | 1.400910000000  | 0.074206000000  |
| H                          | 4.529701000000  | -2.685894000000 | 0.693247000000  |
| C                          | 2.572186000000  | -0.864337000000 | 1.117849000000  |
| C                          | 1.472605000000  | -0.914454000000 | 1.632926000000  |
| C                          | 0.127949000000  | -0.744218000000 | 2.066015000000  |
| O                          | -0.376190000000 | 0.469942000000  | 2.189049000000  |
| O                          | -0.332173000000 | -1.702698000000 | 2.877299000000  |
| C                          | -1.671782000000 | -1.525891000000 | 3.372580000000  |
| H                          | -1.744228000000 | -0.615132000000 | 3.969557000000  |
| H                          | -2.376132000000 | -1.477106000000 | 2.538101000000  |
| H                          | -1.865252000000 | -2.407655000000 | 3.983134000000  |
| <b>TS<sub>7Z/S5S</sub></b> |                 |                 |                 |
| P                          | -1.340685000000 | -0.866047000000 | -0.932107000000 |
| C                          | -2.738560000000 | -0.344125000000 | -2.023560000000 |
| C                          | -4.110248000000 | -0.846074000000 | -1.549957000000 |
| H                          | -2.534062000000 | -0.695196000000 | -3.044006000000 |
| H                          | -2.708539000000 | 0.750306000000  | -2.051218000000 |
| C                          | -5.264389000000 | -0.240784000000 | -2.355220000000 |
| H                          | -4.152020000000 | -1.939831000000 | -1.629323000000 |
| H                          | -4.242547000000 | -0.614868000000 | -0.487731000000 |
| C                          | -6.632080000000 | -0.738555000000 | -1.883122000000 |
| H                          | -5.222951000000 | 0.854607000000  | -2.278094000000 |
| H                          | -5.129376000000 | -0.476170000000 | -3.420024000000 |
| H                          | -6.798329000000 | -0.487232000000 | -0.828530000000 |
| H                          | -7.444989000000 | -0.292105000000 | -2.465879000000 |
| H                          | -6.709996000000 | -1.828237000000 | -1.979438000000 |
| C                          | 0.141923000000  | -0.474368000000 | -1.963826000000 |
| C                          | 1.506987000000  | -0.666307000000 | -1.290342000000 |
| H                          | 0.036089000000  | 0.581639000000  | -2.229410000000 |
| H                          | 0.069009000000  | -1.064674000000 | -2.887854000000 |
| C                          | 2.664755000000  | -0.247018000000 | -2.198513000000 |
| H                          | 1.541565000000  | -0.056579000000 | -0.386876000000 |
| H                          | 1.647593000000  | -1.707429000000 | -0.982883000000 |
| C                          | 4.023577000000  | -0.495254000000 | -1.538984000000 |
| H                          | 2.608980000000  | -0.793213000000 | -3.151428000000 |
| H                          | 2.549878000000  | 0.817802000000  | -2.426931000000 |
| H                          | 4.175391000000  | -1.563098000000 | -1.334994000000 |
| H                          | 4.848231000000  | -0.157100000000 | -2.176254000000 |
| H                          | 4.096373000000  | 0.036127000000  | -0.583323000000 |
| C                          | -1.536930000000 | -2.717856000000 | -0.936924000000 |
| C                          | -0.263781000000 | -3.549301000000 | -0.748904000000 |
| H                          | -1.995383000000 | -2.956855000000 | -1.904724000000 |

|   |                 |                 |                 |
|---|-----------------|-----------------|-----------------|
| H | -2.268864000000 | -2.968248000000 | -0.163775000000 |
| C | -0.531782000000 | -5.061272000000 | -0.799641000000 |
| H | 0.458680000000  | -3.301607000000 | -1.534902000000 |
| H | 0.204236000000  | -3.293821000000 | 0.207478000000  |
| C | -0.995271000000 | -5.565058000000 | -2.169949000000 |
| H | 0.392771000000  | -5.582707000000 | -0.519488000000 |
| H | -1.277217000000 | -5.320692000000 | -0.039887000000 |
| H | -0.274691000000 | -5.298692000000 | -2.953353000000 |
| H | -1.101595000000 | -6.655329000000 | -2.172047000000 |
| H | -1.966016000000 | -5.143169000000 | -2.453779000000 |
| P | -0.782218000000 | -0.578883000000 | 3.109400000000  |
| B | 0.247385000000  | 2.406537000000  | 0.242999000000  |
| O | 1.185422000000  | 2.409875000000  | -0.848627000000 |
| O | -0.036379000000 | 3.769014000000  | 0.587558000000  |
| C | 1.139145000000  | 3.714001000000  | -1.447615000000 |
| C | 0.759754000000  | 4.632572000000  | -0.228728000000 |
| C | 2.499807000000  | 4.009198000000  | -2.072889000000 |
| C | 0.058380000000  | 3.700937000000  | -2.540113000000 |
| C | -0.073521000000 | 5.860259000000  | -0.597271000000 |
| C | 1.980804000000  | 5.071290000000  | 0.592319000000  |
| H | 2.684347000000  | 3.321632000000  | -2.905843000000 |
| H | 2.539569000000  | 5.032226000000  | -2.464602000000 |
| H | 3.304463000000  | 3.883269000000  | -1.345108000000 |
| H | -0.925824000000 | 3.492882000000  | -2.112437000000 |
| H | 0.013330000000  | 4.650453000000  | -3.084433000000 |
| H | 0.293743000000  | 2.907608000000  | -3.258283000000 |
| H | 0.469385000000  | 6.516868000000  | -1.287806000000 |
| H | -1.021441000000 | 5.572493000000  | -1.057642000000 |
| H | -0.299297000000 | 6.433032000000  | 0.308214000000  |
| H | 2.607315000000  | 4.216579000000  | 0.857741000000  |
| H | 2.592878000000  | 5.807942000000  | 0.059457000000  |
| H | 1.626729000000  | 5.524215000000  | 1.523609000000  |
| C | -1.794998000000 | -2.030961000000 | 2.535867000000  |
| C | -3.176715000000 | -1.868719000000 | 2.325266000000  |
| C | -1.280288000000 | -3.337075000000 | 2.537562000000  |
| C | -3.998525000000 | -2.963414000000 | 2.065177000000  |
| H | -3.605467000000 | -0.876401000000 | 2.361997000000  |
| C | -2.111780000000 | -4.437093000000 | 2.316125000000  |
| H | -0.226573000000 | -3.502239000000 | 2.728586000000  |
| C | -3.470632000000 | -4.256918000000 | 2.062214000000  |
| H | -5.059444000000 | -2.806994000000 | 1.888293000000  |
| H | -1.689779000000 | -5.438018000000 | 2.341400000000  |
| H | -4.114444000000 | -5.113154000000 | 1.881553000000  |
| C | 0.853532000000  | -1.389017000000 | 3.368206000000  |

|                             |                 |                 |                 |
|-----------------------------|-----------------|-----------------|-----------------|
| C                           | 1.772416000000  | -1.627842000000 | 2.338395000000  |
| C                           | 1.185041000000  | -1.776908000000 | 4.672421000000  |
| C                           | 3.001265000000  | -2.225483000000 | 2.607513000000  |
| H                           | 1.535638000000  | -1.316619000000 | 1.329506000000  |
| C                           | 2.409845000000  | -2.387803000000 | 4.942997000000  |
| H                           | 0.484174000000  | -1.585662000000 | 5.481096000000  |
| C                           | 3.323377000000  | -2.607084000000 | 3.911663000000  |
| H                           | 3.710691000000  | -2.383206000000 | 1.799632000000  |
| H                           | 2.655811000000  | -2.679109000000 | 5.960483000000  |
| H                           | 4.284434000000  | -3.067450000000 | 4.123417000000  |
| C                           | 2.938231000000  | 1.669130000000  | 4.438727000000  |
| C                           | 4.164065000000  | 1.768392000000  | 3.777867000000  |
| C                           | 4.193952000000  | 1.793393000000  | 2.382567000000  |
| C                           | 3.008984000000  | 1.708608000000  | 1.655001000000  |
| C                           | 1.772427000000  | 1.559867000000  | 2.308913000000  |
| C                           | 1.755231000000  | 1.564702000000  | 3.711982000000  |
| H                           | 2.903907000000  | 1.664740000000  | 5.524745000000  |
| H                           | 5.087260000000  | 1.835975000000  | 4.346885000000  |
| H                           | 5.141775000000  | 1.887242000000  | 1.858835000000  |
| H                           | 3.018078000000  | 1.752590000000  | 0.571619000000  |
| H                           | 0.806015000000  | 1.491074000000  | 4.233789000000  |
| C                           | 0.563019000000  | 1.406435000000  | 1.489466000000  |
| C                           | -0.448975000000 | 0.517161000000  | 1.664171000000  |
| C                           | -1.468829000000 | 0.779062000000  | 0.597965000000  |
| O                           | -1.155062000000 | 1.757978000000  | -0.204907000000 |
| O                           | -2.780763000000 | 0.732838000000  | 1.009357000000  |
| C                           | -3.587820000000 | 1.869741000000  | 0.664405000000  |
| H                           | -3.834387000000 | 1.880148000000  | -0.400551000000 |
| H                           | -4.499651000000 | 1.753332000000  | 1.252672000000  |
| H                           | -3.074203000000 | 2.797675000000  | 0.923210000000  |
| <b>TS<sub>10z/sss</sub></b> |                 |                 |                 |
| P                           | 0.694594000000  | -1.550582000000 | 0.483571000000  |
| C                           | -0.750719000000 | -2.322784000000 | 1.309584000000  |
| C                           | -1.896472000000 | -2.739777000000 | 0.388489000000  |
| H                           | -1.103752000000 | -1.593912000000 | 2.040423000000  |
| H                           | -0.360435000000 | -3.186861000000 | 1.864448000000  |
| C                           | -3.087452000000 | -3.273944000000 | 1.191035000000  |
| H                           | -2.217222000000 | -1.878932000000 | -0.201452000000 |
| H                           | -1.559602000000 | -3.498469000000 | -0.330734000000 |
| C                           | -4.263907000000 | -3.672910000000 | 0.299569000000  |
| H                           | -2.766351000000 | -4.133328000000 | 1.797215000000  |
| H                           | -3.407904000000 | -2.495981000000 | 1.896408000000  |
| H                           | -5.098573000000 | -4.060270000000 | 0.894645000000  |
| H                           | -4.624160000000 | -2.815559000000 | -0.277146000000 |

|   |                 |                 |                 |
|---|-----------------|-----------------|-----------------|
| H | -3.973277000000 | -4.448098000000 | -0.419550000000 |
| C | 1.423791000000  | -2.874959000000 | -0.578220000000 |
| C | 1.578843000000  | -4.257291000000 | 0.066903000000  |
| H | 2.393644000000  | -2.487307000000 | -0.910797000000 |
| H | 0.798354000000  | -2.938161000000 | -1.475191000000 |
| C | 2.257425000000  | -5.279916000000 | -0.858356000000 |
| H | 2.157212000000  | -4.179656000000 | 0.997930000000  |
| H | 0.589750000000  | -4.637887000000 | 0.346732000000  |
| C | 3.709394000000  | -4.940955000000 | -1.206807000000 |
| H | 2.224267000000  | -6.262282000000 | -0.370020000000 |
| H | 1.668291000000  | -5.375466000000 | -1.780811000000 |
| H | 3.786163000000  | -4.013213000000 | -1.784409000000 |
| H | 4.313686000000  | -4.819312000000 | -0.299258000000 |
| H | 4.164609000000  | -5.736561000000 | -1.806097000000 |
| C | 1.958154000000  | -1.226225000000 | 1.781364000000  |
| C | 1.387151000000  | -0.831844000000 | 3.148177000000  |
| H | 2.582049000000  | -0.417108000000 | 1.392012000000  |
| H | 2.584451000000  | -2.123717000000 | 1.861647000000  |
| C | 2.483151000000  | -0.361471000000 | 4.106512000000  |
| H | 0.660523000000  | -0.029778000000 | 2.995950000000  |
| H | 0.851072000000  | -1.681616000000 | 3.591361000000  |
| C | 1.916639000000  | 0.077864000000  | 5.458119000000  |
| H | 3.221301000000  | -1.162837000000 | 4.256219000000  |
| H | 3.013140000000  | 0.474257000000  | 3.635824000000  |
| H | 1.391788000000  | -0.746430000000 | 5.956251000000  |
| H | 2.707916000000  | 0.425583000000  | 6.132000000000  |
| H | 1.199231000000  | 0.896862000000  | 5.331030000000  |
| P | -2.172242000000 | 1.093723000000  | -1.637223000000 |
| B | 1.191183000000  | 1.853383000000  | 0.555742000000  |
| O | 1.867538000000  | 1.916317000000  | 1.763973000000  |
| O | 0.802678000000  | 3.105038000000  | 0.114975000000  |
| C | 2.095371000000  | 3.309487000000  | 2.086519000000  |
| C | 1.087004000000  | 4.082275000000  | 1.137145000000  |
| C | 1.842538000000  | 3.516346000000  | 3.576504000000  |
| C | 3.569354000000  | 3.581472000000  | 1.766704000000  |
| C | 1.684409000000  | 5.311058000000  | 0.451947000000  |
| C | -0.240349000000 | 4.468632000000  | 1.792620000000  |
| H | 2.548072000000  | 2.915661000000  | 4.158582000000  |
| H | 1.983967000000  | 4.567410000000  | 3.851509000000  |
| H | 0.830154000000  | 3.219695000000  | 3.857245000000  |
| H | 4.189362000000  | 2.904365000000  | 2.362466000000  |
| H | 3.783737000000  | 3.392057000000  | 0.710863000000  |
| H | 3.856900000000  | 4.610980000000  | 2.003105000000  |
| H | 2.559284000000  | 5.055236000000  | -0.149186000000 |

|   |                 |                 |                 |
|---|-----------------|-----------------|-----------------|
| H | 0.935334000000  | 5.753072000000  | -0.212120000000 |
| H | 1.972388000000  | 6.068160000000  | 1.189751000000  |
| H | -0.741187000000 | 3.608216000000  | 2.234243000000  |
| H | -0.101618000000 | 5.234740000000  | 2.562681000000  |
| H | -0.904008000000 | 4.871870000000  | 1.021865000000  |
| C | -1.139790000000 | 1.643151000000  | -3.069631000000 |
| C | -1.284237000000 | 1.150989000000  | -4.374712000000 |
| C | -0.238242000000 | 2.699026000000  | -2.850876000000 |
| C | -0.525293000000 | 1.674540000000  | -5.423272000000 |
| H | -1.984537000000 | 0.348307000000  | -4.577602000000 |
| C | 0.523699000000  | 3.214371000000  | -3.898289000000 |
| H | -0.111902000000 | 3.102513000000  | -1.852449000000 |
| C | 0.387421000000  | 2.703423000000  | -5.191068000000 |
| H | -0.650164000000 | 1.273331000000  | -6.426162000000 |
| H | 1.225027000000  | 4.021473000000  | -3.700671000000 |
| H | 0.978703000000  | 3.107862000000  | -6.008285000000 |
| C | -2.960935000000 | -0.447378000000 | -2.304668000000 |
| C | -2.262410000000 | -1.552440000000 | -2.821069000000 |
| C | -4.362692000000 | -0.494496000000 | -2.286655000000 |
| C | -2.948571000000 | -2.666421000000 | -3.301105000000 |
| H | -1.179235000000 | -1.522732000000 | -2.843993000000 |
| C | -5.052233000000 | -1.609380000000 | -2.770250000000 |
| H | -4.914381000000 | 0.355078000000  | -1.892222000000 |
| C | -4.345384000000 | -2.698438000000 | -3.278615000000 |
| H | -2.393307000000 | -3.513046000000 | -3.697701000000 |
| H | -6.138669000000 | -1.625022000000 | -2.750389000000 |
| H | -4.877883000000 | -3.568295000000 | -3.653366000000 |
| C | -2.930059000000 | 1.758347000000  | 3.948501000000  |
| C | -4.225612000000 | 1.368113000000  | 3.597588000000  |
| C | -4.443130000000 | 0.760379000000  | 2.358855000000  |
| C | -3.389334000000 | 0.574397000000  | 1.467341000000  |
| C | -2.073728000000 | 0.988154000000  | 1.786421000000  |
| C | -1.873481000000 | 1.546434000000  | 3.069134000000  |
| H | -2.741221000000 | 2.204911000000  | 4.921657000000  |
| H | -5.050093000000 | 1.514751000000  | 4.289768000000  |
| H | -5.442015000000 | 0.430112000000  | 2.083996000000  |
| H | -3.574895000000 | 0.081060000000  | 0.519708000000  |
| H | -0.858326000000 | 1.791452000000  | 3.365719000000  |
| C | -0.933253000000 | 0.698030000000  | 0.939877000000  |
| C | -0.914980000000 | 0.534510000000  | -0.398681000000 |
| C | 0.466517000000  | -0.020005000000 | -0.757710000000 |
| O | 1.483431000000  | 0.849367000000  | -0.400040000000 |
| O | 0.610976000000  | -0.484596000000 | -2.054664000000 |
| C | 1.788625000000  | -0.141547000000 | -2.786019000000 |

|                           |                 |                 |                 |
|---------------------------|-----------------|-----------------|-----------------|
| H                         | 2.686761000000  | -0.579034000000 | -2.334174000000 |
| H                         | 1.631903000000  | -0.558606000000 | -3.781731000000 |
| H                         | 1.899244000000  | 0.940839000000  | -2.855159000000 |
| <b>TS<sub>SU/SZ</sub></b> |                 |                 |                 |
| P                         | 6.143175000000  | -0.522682000000 | -0.248194000000 |
| B                         | 8.401524000000  | -4.433432000000 | -0.748013000000 |
| O                         | 9.751519000000  | -4.750179000000 | -0.691597000000 |
| O                         | 7.875614000000  | -4.515037000000 | -2.027978000000 |
| C                         | 10.149276000000 | -5.154247000000 | -2.024882000000 |
| C                         | 8.996522000000  | -4.577404000000 | -2.940617000000 |
| C                         | 11.531631000000 | -4.575244000000 | -2.309715000000 |
| C                         | 10.206097000000 | -6.685685000000 | -2.018963000000 |
| C                         | 8.602528000000  | -5.474899000000 | -4.110619000000 |
| C                         | 9.268054000000  | -3.158435000000 | -3.448401000000 |
| H                         | 11.542196000000 | -3.491242000000 | -2.178396000000 |
| H                         | 12.260135000000 | -5.010122000000 | -1.617933000000 |
| H                         | 11.850407000000 | -4.809603000000 | -3.331799000000 |
| H                         | 9.222452000000  | -7.113589000000 | -1.803097000000 |
| H                         | 10.560593000000 | -7.086114000000 | -2.974592000000 |
| H                         | 10.894471000000 | -7.007893000000 | -1.231839000000 |
| H                         | 9.445341000000  | -5.611232000000 | -4.797542000000 |
| H                         | 8.264497000000  | -6.455680000000 | -3.770263000000 |
| H                         | 7.783653000000  | -5.007908000000 | -4.666848000000 |
| H                         | 10.047213000000 | -3.151165000000 | -4.217775000000 |
| H                         | 8.347106000000  | -2.760910000000 | -3.886207000000 |
| H                         | 9.569796000000  | -2.491044000000 | -2.640937000000 |
| C                         | 6.364844000000  | 0.523879000000  | 1.253279000000  |
| C                         | 6.912445000000  | 0.029587000000  | 2.447925000000  |
| C                         | 5.983041000000  | 1.869778000000  | 1.185205000000  |
| C                         | 7.069672000000  | 0.868707000000  | 3.548940000000  |
| H                         | 7.207608000000  | -1.012539000000 | 2.512906000000  |
| C                         | 6.140951000000  | 2.710116000000  | 2.288881000000  |
| H                         | 5.562519000000  | 2.258645000000  | 0.261687000000  |
| C                         | 6.685551000000  | 2.210157000000  | 3.471225000000  |
| H                         | 7.495527000000  | 0.477680000000  | 4.469113000000  |
| H                         | 5.841078000000  | 3.752341000000  | 2.223511000000  |
| H                         | 6.812725000000  | 2.862854000000  | 4.330541000000  |
| C                         | 5.003001000000  | -1.848502000000 | 0.312683000000  |
| C                         | 4.214099000000  | -1.742130000000 | 1.465142000000  |
| C                         | 4.870438000000  | -2.989919000000 | -0.496907000000 |
| C                         | 3.328444000000  | -2.762968000000 | 1.813359000000  |
| H                         | 4.302831000000  | -0.868242000000 | 2.101896000000  |
| C                         | 4.000290000000  | -4.017037000000 | -0.136419000000 |
| H                         | 5.476609000000  | -3.097347000000 | -1.392343000000 |

|                            |                 |                 |                 |
|----------------------------|-----------------|-----------------|-----------------|
| C                          | 3.224631000000  | -3.906610000000 | 1.020292000000  |
| H                          | 2.724396000000  | -2.666301000000 | 2.711729000000  |
| H                          | 3.931847000000  | -4.903641000000 | -0.760099000000 |
| H                          | 2.539674000000  | -4.703606000000 | 1.296942000000  |
| C                          | 9.844911000000  | 1.112006000000  | -2.228128000000 |
| C                          | 11.140466000000 | 0.682067000000  | -1.944307000000 |
| C                          | 11.333805000000 | -0.424268000000 | -1.110474000000 |
| C                          | 10.241449000000 | -1.089067000000 | -0.566532000000 |
| C                          | 8.925738000000  | -0.668517000000 | -0.848290000000 |
| C                          | 8.747237000000  | 0.444633000000  | -1.685635000000 |
| H                          | 9.684742000000  | 1.965988000000  | -2.880285000000 |
| H                          | 11.994523000000 | 1.203151000000  | -2.367880000000 |
| H                          | 12.339862000000 | -0.765278000000 | -0.882006000000 |
| H                          | 10.380824000000 | -1.957708000000 | 0.068433000000  |
| H                          | 7.743318000000  | 0.773623000000  | -1.932836000000 |
| C                          | 7.793324000000  | -1.412385000000 | -0.252449000000 |
| C                          | 7.975735000000  | -2.675917000000 | 0.160150000000  |
| C                          | 7.356584000000  | -3.646908000000 | 0.910358000000  |
| O                          | 7.468547000000  | -4.842094000000 | 0.349322000000  |
| O                          | 6.916692000000  | -3.545450000000 | 2.151661000000  |
| C                          | 6.524757000000  | -4.761322000000 | 2.822754000000  |
| H                          | 5.609238000000  | -5.145692000000 | 2.369508000000  |
| H                          | 7.320894000000  | -5.505919000000 | 2.757609000000  |
| H                          | 6.345696000000  | -4.471126000000 | 3.857576000000  |
| <b>TS<sub>S1/S8S</sub></b> |                 |                 |                 |
| P                          | 3.981649000000  | 0.287565000000  | 0.350194000000  |
| C                          | 4.450291000000  | 2.068277000000  | 0.593091000000  |
| C                          | 5.652434000000  | 2.300822000000  | 1.513093000000  |
| H                          | 3.569262000000  | 2.616451000000  | 0.957107000000  |
| H                          | 4.675249000000  | 2.456623000000  | -0.404204000000 |
| C                          | 6.207039000000  | 3.725390000000  | 1.409784000000  |
| H                          | 5.374446000000  | 2.093860000000  | 2.555564000000  |
| H                          | 6.451863000000  | 1.596775000000  | 1.264238000000  |
| C                          | 7.444815000000  | 3.933702000000  | 2.285740000000  |
| H                          | 6.465314000000  | 3.928085000000  | 0.360679000000  |
| H                          | 5.426160000000  | 4.450725000000  | 1.679559000000  |
| H                          | 7.211502000000  | 3.761803000000  | 3.343970000000  |
| H                          | 8.241388000000  | 3.235860000000  | 2.003550000000  |
| H                          | 7.835217000000  | 4.953393000000  | 2.191851000000  |
| C                          | 2.391274000000  | 0.435591000000  | -0.605775000000 |
| C                          | 2.513445000000  | 1.335601000000  | -1.842964000000 |
| H                          | 1.596422000000  | 0.807704000000  | 0.056493000000  |
| H                          | 2.128273000000  | -0.589506000000 | -0.886200000000 |
| C                          | 1.300565000000  | 1.267112000000  | -2.781876000000 |

|   |                 |                 |                 |
|---|-----------------|-----------------|-----------------|
| H | 2.650774000000  | 2.372412000000  | -1.518480000000 |
| H | 3.415202000000  | 1.079231000000  | -2.408671000000 |
| C | 1.168395000000  | -0.062478000000 | -3.529724000000 |
| H | 0.382507000000  | 1.466602000000  | -2.210918000000 |
| H | 1.391606000000  | 2.078070000000  | -3.515778000000 |
| H | 0.288603000000  | -0.063921000000 | -4.182899000000 |
| H | 2.050148000000  | -0.246345000000 | -4.153451000000 |
| H | 1.066957000000  | -0.909371000000 | -2.840942000000 |
| C | 3.375049000000  | -0.241380000000 | 2.028697000000  |
| C | 4.464526000000  | -0.885499000000 | 2.896369000000  |
| H | 2.569511000000  | -0.964363000000 | 1.855403000000  |
| H | 2.926777000000  | 0.625952000000  | 2.529953000000  |
| C | 3.941826000000  | -1.431761000000 | 4.232066000000  |
| H | 4.930936000000  | -1.697966000000 | 2.328491000000  |
| H | 5.262390000000  | -0.157819000000 | 3.090551000000  |
| C | 3.398397000000  | -0.354856000000 | 5.175865000000  |
| H | 3.157848000000  | -2.177273000000 | 4.034988000000  |
| H | 4.757720000000  | -1.970169000000 | 4.731890000000  |
| H | 3.098714000000  | -0.785076000000 | 6.137801000000  |
| H | 4.159013000000  | 0.410610000000  | 5.374269000000  |
| H | 2.522379000000  | 0.150009000000  | 4.753991000000  |
| P | 6.963352000000  | -0.610434000000 | -2.943546000000 |
| B | 6.936740000000  | -3.829674000000 | -0.499719000000 |
| O | 7.648955000000  | -4.621697000000 | -1.355525000000 |
| O | 7.628551000000  | -3.407972000000 | 0.601163000000  |
| C | 9.040314000000  | -4.515417000000 | -0.934585000000 |
| C | 8.907689000000  | -4.105121000000 | 0.579510000000  |
| C | 9.723267000000  | -5.854265000000 | -1.181118000000 |
| C | 9.675698000000  | -3.420097000000 | -1.794716000000 |
| C | 9.995113000000  | -3.164357000000 | 1.081219000000  |
| C | 8.759291000000  | -5.304470000000 | 1.519490000000  |
| H | 9.192387000000  | -6.673888000000 | -0.692319000000 |
| H | 9.749474000000  | -6.059179000000 | -2.255746000000 |
| H | 10.754966000000 | -5.833659000000 | -0.813175000000 |
| H | 9.190256000000  | -2.454581000000 | -1.631395000000 |
| H | 10.744087000000 | -3.314434000000 | -1.582282000000 |
| H | 9.558171000000  | -3.685810000000 | -2.849247000000 |
| H | 10.974009000000 | -3.654404000000 | 1.025857000000  |
| H | 10.027348000000 | -2.237198000000 | 0.509095000000  |
| H | 9.802239000000  | -2.902656000000 | 2.125460000000  |
| H | 9.696846000000  | -5.861444000000 | 1.613242000000  |
| H | 8.472105000000  | -4.941910000000 | 2.511024000000  |
| H | 7.981024000000  | -5.989350000000 | 1.168110000000  |
| C | 6.005752000000  | 0.921288000000  | -3.335748000000 |



|                             |                 |                 |                 |
|-----------------------------|-----------------|-----------------|-----------------|
| C                           | 6.158875000000  | 2.060531000000  | -2.528820000000 |
| C                           | 5.219732000000  | 1.028924000000  | -4.494623000000 |
| C                           | 5.526975000000  | 3.259929000000  | -2.856969000000 |
| H                           | 6.772019000000  | 2.003243000000  | -1.634220000000 |
| C                           | 4.576710000000  | 2.224989000000  | -4.815021000000 |
| H                           | 5.094449000000  | 0.164793000000  | -5.140037000000 |
| C                           | 4.724133000000  | 3.345848000000  | -3.995891000000 |
| H                           | 5.655740000000  | 4.127804000000  | -2.214774000000 |
| H                           | 3.958220000000  | 2.279885000000  | -5.707188000000 |
| H                           | 4.224105000000  | 4.277360000000  | -4.245704000000 |
| C                           | 5.817641000000  | -1.942619000000 | -3.489669000000 |
| C                           | 4.423236000000  | -1.888790000000 | -3.337808000000 |
| C                           | 6.390241000000  | -3.111464000000 | -4.007469000000 |
| C                           | 3.627412000000  | -2.979153000000 | -3.679063000000 |
| H                           | 3.962438000000  | -0.996239000000 | -2.934642000000 |
| C                           | 5.596646000000  | -4.208186000000 | -4.344860000000 |
| H                           | 7.467553000000  | -3.166528000000 | -4.130016000000 |
| C                           | 4.214153000000  | -4.144802000000 | -4.178094000000 |
| H                           | 2.550320000000  | -2.920840000000 | -3.548537000000 |
| H                           | 6.060077000000  | -5.111888000000 | -4.730405000000 |
| H                           | 3.593866000000  | -4.998575000000 | -4.438056000000 |
| C                           | 10.026667000000 | 1.017363000000  | -0.008632000000 |
| C                           | 9.976127000000  | 0.857646000000  | 1.378042000000  |
| C                           | 8.900344000000  | 0.160319000000  | 1.935672000000  |
| C                           | 7.898064000000  | -0.361538000000 | 1.126377000000  |
| C                           | 7.921916000000  | -0.200552000000 | -0.278302000000 |
| C                           | 9.018941000000  | 0.502693000000  | -0.821883000000 |
| H                           | 10.855145000000 | 1.553986000000  | -0.464138000000 |
| H                           | 10.760216000000 | 1.264161000000  | 2.010384000000  |
| H                           | 8.845024000000  | 0.016328000000  | 3.012182000000  |
| H                           | 7.086017000000  | -0.927218000000 | 1.565228000000  |
| H                           | 9.081596000000  | 0.643372000000  | -1.896899000000 |
| C                           | 6.830533000000  | -0.731135000000 | -1.102544000000 |
| C                           | 5.690107000000  | -1.220124000000 | -0.539197000000 |
| C                           | 5.031840000000  | -2.374297000000 | -0.432068000000 |
| O                           | 5.596362000000  | -3.582138000000 | -0.717888000000 |
| O                           | 3.710452000000  | -2.472635000000 | -0.122411000000 |
| C                           | 3.298487000000  | -3.660144000000 | 0.560321000000  |
| H                           | 3.405698000000  | -4.535611000000 | -0.084058000000 |
| H                           | 3.875072000000  | -3.807626000000 | 1.480771000000  |
| H                           | 2.247077000000  | -3.501933000000 | 0.806748000000  |
| <b>TS<sub>S7Z/S9R</sub></b> |                 |                 |                 |
| P                           | -0.075888000000 | -0.137225000000 | -1.325354000000 |
| C                           | -1.008906000000 | -0.835778000000 | -2.782800000000 |

|   |                 |                 |                 |
|---|-----------------|-----------------|-----------------|
| C | -1.632073000000 | -2.225437000000 | -2.621867000000 |
| H | -0.331358000000 | -0.830255000000 | -3.645961000000 |
| H | -1.792970000000 | -0.101515000000 | -3.003211000000 |
| C | -2.564767000000 | -2.577117000000 | -3.784945000000 |
| H | -0.839898000000 | -2.982485000000 | -2.549019000000 |
| H | -2.201867000000 | -2.279755000000 | -1.691859000000 |
| C | -3.222433000000 | -3.947232000000 | -3.609373000000 |
| H | -3.342062000000 | -1.804891000000 | -3.857697000000 |
| H | -2.006686000000 | -2.546345000000 | -4.731363000000 |
| H | -3.893422000000 | -4.181406000000 | -4.443377000000 |
| H | -2.470419000000 | -4.743684000000 | -3.551123000000 |
| H | -3.810293000000 | -3.976308000000 | -2.684426000000 |
| C | 0.582860000000  | -1.626248000000 | -0.443508000000 |
| C | 1.367608000000  | -1.334740000000 | 0.840297000000  |
| H | 1.192231000000  | -2.204500000000 | -1.150047000000 |
| H | -0.291085000000 | -2.243876000000 | -0.213462000000 |
| C | 1.942598000000  | -2.608976000000 | 1.464136000000  |
| H | 2.171379000000  | -0.619157000000 | 0.637552000000  |
| H | 0.708069000000  | -0.843129000000 | 1.562246000000  |
| C | 2.680379000000  | -2.325859000000 | 2.774805000000  |
| H | 1.128501000000  | -3.325070000000 | 1.647270000000  |
| H | 2.622329000000  | -3.095809000000 | 0.749844000000  |
| H | 3.081891000000  | -3.243704000000 | 3.218767000000  |
| H | 3.518262000000  | -1.637091000000 | 2.611947000000  |
| H | 2.009112000000  | -1.860859000000 | 3.506426000000  |
| C | 1.347305000000  | 0.683235000000  | -2.187421000000 |
| C | 2.409909000000  | -0.267502000000 | -2.749341000000 |
| H | 1.785340000000  | 1.387010000000  | -1.480066000000 |
| H | 0.891610000000  | 1.267318000000  | -2.996808000000 |
| C | 3.472737000000  | 0.477340000000  | -3.566672000000 |
| H | 2.901741000000  | -0.796518000000 | -1.923098000000 |
| H | 1.948106000000  | -1.039447000000 | -3.381165000000 |
| C | 4.564632000000  | -0.453017000000 | -4.099733000000 |
| H | 2.985869000000  | 0.996460000000  | -4.403722000000 |
| H | 3.922596000000  | 1.259186000000  | -2.940361000000 |
| H | 5.310067000000  | 0.097519000000  | -4.684063000000 |
| H | 5.088481000000  | -0.956451000000 | -3.278204000000 |
| H | 4.139612000000  | -1.230146000000 | -4.746779000000 |
| P | -1.766623000000 | 2.438072000000  | -1.287237000000 |
| B | -1.907338000000 | 0.923726000000  | 2.593122000000  |
| O | -1.352328000000 | 0.489378000000  | 3.784822000000  |
| O | -3.281747000000 | 1.094437000000  | 2.714902000000  |
| C | -2.336481000000 | 0.700826000000  | 4.822426000000  |
| C | -3.684486000000 | 0.622036000000  | 4.020933000000  |

|   |                 |                 |                 |
|---|-----------------|-----------------|-----------------|
| C | -2.160693000000 | -0.369156000000 | 5.893431000000  |
| C | -2.068317000000 | 2.090934000000  | 5.410601000000  |
| C | -4.798598000000 | 1.527724000000  | 4.534391000000  |
| C | -4.203954000000 | -0.808375000000 | 3.851393000000  |
| H | -1.188831000000 | -0.244544000000 | 6.381146000000  |
| H | -2.940080000000 | -0.284885000000 | 6.659297000000  |
| H | -2.197778000000 | -1.373465000000 | 5.465905000000  |
| H | -2.730868000000 | 2.310787000000  | 6.254298000000  |
| H | -1.031943000000 | 2.129963000000  | 5.757632000000  |
| H | -2.194619000000 | 2.868042000000  | 4.650916000000  |
| H | -4.498236000000 | 2.577538000000  | 4.515366000000  |
| H | -5.684169000000 | 1.415960000000  | 3.900217000000  |
| H | -5.078063000000 | 1.260881000000  | 5.559853000000  |
| H | -3.407256000000 | -1.480491000000 | 3.523299000000  |
| H | -4.626875000000 | -1.195635000000 | 4.784348000000  |
| H | -4.981802000000 | -0.813746000000 | 3.082784000000  |
| C | -3.406050000000 | 3.209506000000  | -0.898764000000 |
| C | -4.091967000000 | 3.073093000000  | 0.316807000000  |
| C | -3.980222000000 | 3.985800000000  | -1.917218000000 |
| C | -5.319877000000 | 3.708388000000  | 0.504699000000  |
| H | -3.688361000000 | 2.463828000000  | 1.115433000000  |
| C | -5.202705000000 | 4.628459000000  | -1.722219000000 |
| H | -3.464110000000 | 4.085810000000  | -2.869300000000 |
| C | -5.877455000000 | 4.489540000000  | -0.508389000000 |
| H | -5.840735000000 | 3.587451000000  | 1.451217000000  |
| H | -5.630252000000 | 5.230813000000  | -2.519428000000 |
| H | -6.833640000000 | 4.983043000000  | -0.356195000000 |
| C | -0.669135000000 | 3.754077000000  | -0.612813000000 |
| C | 0.442995000000  | 4.131780000000  | -1.375291000000 |
| C | -0.916184000000 | 4.414540000000  | 0.598589000000  |
| C | 1.310869000000  | 5.126275000000  | -0.927520000000 |
| H | 0.633851000000  | 3.633256000000  | -2.320880000000 |
| C | -0.046413000000 | 5.405372000000  | 1.050953000000  |
| H | -1.782467000000 | 4.147309000000  | 1.192161000000  |
| C | 1.070472000000  | 5.761137000000  | 0.291806000000  |
| H | 2.172790000000  | 5.404672000000  | -1.527907000000 |
| H | -0.241902000000 | 5.901026000000  | 1.997975000000  |
| H | 1.744820000000  | 6.536768000000  | 0.645162000000  |
| C | -4.740479000000 | -0.962352000000 | -1.170616000000 |
| C | -4.665944000000 | -2.086475000000 | -0.350151000000 |
| C | -3.620188000000 | -2.187316000000 | 0.570645000000  |
| C | -2.672789000000 | -1.173936000000 | 0.666625000000  |
| C | -2.743339000000 | -0.018641000000 | -0.135839000000 |
| C | -3.791896000000 | 0.056243000000  | -1.067027000000 |

|                             |                 |                 |                 |
|-----------------------------|-----------------|-----------------|-----------------|
| H                           | -5.544770000000 | -0.867275000000 | -1.894491000000 |
| H                           | -5.407925000000 | -2.875892000000 | -0.429377000000 |
| H                           | -3.537652000000 | -3.061251000000 | 1.210740000000  |
| H                           | -1.853700000000 | -1.271460000000 | 1.370705000000  |
| H                           | -3.893944000000 | 0.919942000000  | -1.710202000000 |
| C                           | -1.657521000000 | 1.022828000000  | -0.006954000000 |
| C                           | -1.131860000000 | 1.241593000000  | 1.311891000000  |
| C                           | 0.206521000000  | 1.749476000000  | 1.424176000000  |
| O                           | 1.070957000000  | 1.687199000000  | 0.539923000000  |
| O                           | 0.510992000000  | 2.281027000000  | 2.643185000000  |
| C                           | 1.862789000000  | 2.708338000000  | 2.796690000000  |
| H                           | 1.931525000000  | 3.098671000000  | 3.814010000000  |
| H                           | 2.559043000000  | 1.873826000000  | 2.666004000000  |
| H                           | 2.106219000000  | 3.489393000000  | 2.070784000000  |
| <b>TS<sub>S7Z/S9S</sub></b> |                 |                 |                 |
| P                           | 7.039187000000  | -1.745881000000 | 1.286943000000  |
| C                           | 6.097646000000  | -3.312702000000 | 1.036637000000  |
| C                           | 6.312229000000  | -4.422228000000 | 2.073842000000  |
| H                           | 6.334665000000  | -3.676171000000 | 0.033801000000  |
| H                           | 5.048912000000  | -3.019973000000 | 1.009897000000  |
| C                           | 5.311592000000  | -5.574679000000 | 1.887457000000  |
| H                           | 7.331381000000  | -4.816567000000 | 1.987736000000  |
| H                           | 6.217189000000  | -4.029966000000 | 3.095309000000  |
| C                           | 3.857990000000  | -5.190343000000 | 2.181820000000  |
| H                           | 5.390719000000  | -5.954031000000 | 0.860001000000  |
| H                           | 5.606359000000  | -6.401141000000 | 2.547248000000  |
| H                           | 3.489783000000  | -4.420408000000 | 1.495670000000  |
| H                           | 3.197421000000  | -6.058668000000 | 2.084466000000  |
| H                           | 3.752175000000  | -4.803318000000 | 3.203052000000  |
| C                           | 6.230435000000  | -0.854831000000 | 2.698547000000  |
| C                           | 4.815824000000  | -1.314988000000 | 3.075863000000  |
| H                           | 6.176764000000  | 0.199523000000  | 2.417029000000  |
| H                           | 6.903019000000  | -0.940766000000 | 3.561332000000  |
| C                           | 4.262689000000  | -0.503318000000 | 4.250090000000  |
| H                           | 4.159527000000  | -1.195756000000 | 2.209134000000  |
| H                           | 4.805142000000  | -2.378607000000 | 3.340113000000  |
| C                           | 2.804113000000  | -0.846860000000 | 4.558229000000  |
| H                           | 4.883048000000  | -0.677618000000 | 5.140917000000  |
| H                           | 4.349249000000  | 0.562477000000  | 4.013091000000  |
| H                           | 2.163389000000  | -0.636482000000 | 3.693395000000  |
| H                           | 2.688682000000  | -1.910193000000 | 4.802055000000  |
| H                           | 2.424818000000  | -0.266020000000 | 5.406435000000  |
| C                           | 8.661685000000  | -2.353249000000 | 1.990065000000  |
| C                           | 9.696976000000  | -1.286703000000 | 2.358966000000  |

|   |                 |                 |                 |
|---|-----------------|-----------------|-----------------|
| H | 9.075783000000  | -3.050595000000 | 1.257819000000  |
| H | 8.394852000000  | -2.936026000000 | 2.881990000000  |
| C | 10.832510000000 | -1.838958000000 | 3.235875000000  |
| H | 10.106016000000 | -0.844450000000 | 1.444257000000  |
| H | 9.212704000000  | -0.474721000000 | 2.917289000000  |
| C | 11.670007000000 | -2.937940000000 | 2.578198000000  |
| H | 11.488975000000 | -1.004124000000 | 3.514085000000  |
| H | 10.403432000000 | -2.216541000000 | 4.175027000000  |
| H | 11.063742000000 | -3.816371000000 | 2.329321000000  |
| H | 12.124270000000 | -2.577690000000 | 1.650292000000  |
| H | 12.472524000000 | -3.269833000000 | 3.246226000000  |
| P | 7.410754000000  | -1.797479000000 | -1.776423000000 |
| B | 4.322980000000  | 0.625849000000  | 0.055730000000  |
| O | 4.596741000000  | 1.324994000000  | 1.227304000000  |
| O | 3.265132000000  | 1.195994000000  | -0.628222000000 |
| C | 3.801059000000  | 2.537726000000  | 1.218868000000  |
| C | 2.628270000000  | 2.145167000000  | 0.253646000000  |
| C | 3.375297000000  | 2.862209000000  | 2.645878000000  |
| C | 4.689200000000  | 3.655917000000  | 0.667911000000  |
| C | 2.070608000000  | 3.293070000000  | -0.579606000000 |
| C | 1.491569000000  | 1.397035000000  | 0.960259000000  |
| H | 2.828998000000  | 2.035984000000  | 3.104410000000  |
| H | 4.260166000000  | 3.069259000000  | 3.256751000000  |
| H | 2.737111000000  | 3.752956000000  | 2.663688000000  |
| H | 4.982814000000  | 3.451442000000  | -0.363359000000 |
| H | 4.183965000000  | 4.626714000000  | 0.707754000000  |
| H | 5.603637000000  | 3.711771000000  | 1.265476000000  |
| H | 1.646761000000  | 4.072690000000  | 0.063748000000  |
| H | 2.842566000000  | 3.739783000000  | -1.209836000000 |
| H | 1.274999000000  | 2.920431000000  | -1.232401000000 |
| H | 0.905123000000  | 2.058630000000  | 1.606387000000  |
| H | 0.828843000000  | 0.970780000000  | 0.201741000000  |
| H | 1.884382000000  | 0.570880000000  | 1.560409000000  |
| C | 9.212898000000  | -1.462528000000 | -1.451850000000 |
| C | 9.884703000000  | -0.225817000000 | -1.464403000000 |
| C | 9.977509000000  | -2.619432000000 | -1.226165000000 |
| C | 11.258291000000 | -0.155263000000 | -1.234090000000 |
| H | 9.344373000000  | 0.686174000000  | -1.676328000000 |
| C | 11.354180000000 | -2.554231000000 | -1.005841000000 |
| H | 9.479676000000  | -3.586099000000 | -1.238164000000 |
| C | 11.997688000000 | -1.317060000000 | -1.001801000000 |
| H | 11.752293000000 | 0.812583000000  | -1.244687000000 |
| H | 11.920416000000 | -3.466525000000 | -0.840745000000 |
| H | 13.069109000000 | -1.258031000000 | -0.829895000000 |

|                             |                 |                 |                 |
|-----------------------------|-----------------|-----------------|-----------------|
| C                           | 7.115875000000  | -0.895136000000 | -3.362985000000 |
| C                           | 5.802169000000  | -0.832474000000 | -3.864177000000 |
| C                           | 8.146204000000  | -0.329831000000 | -4.130094000000 |
| C                           | 5.528818000000  | -0.170260000000 | -5.059204000000 |
| H                           | 5.004277000000  | -1.319299000000 | -3.319977000000 |
| C                           | 7.869490000000  | 0.319512000000  | -5.333918000000 |
| H                           | 9.173942000000  | -0.392194000000 | -3.795080000000 |
| C                           | 6.558443000000  | 0.417400000000  | -5.796652000000 |
| H                           | 4.504180000000  | -0.120344000000 | -5.418153000000 |
| H                           | 8.685279000000  | 0.753204000000  | -5.906610000000 |
| H                           | 6.342102000000  | 0.932585000000  | -6.728687000000 |
| C                           | 7.451287000000  | 2.872731000000  | -1.565034000000 |
| C                           | 8.320455000000  | 3.312095000000  | -0.563126000000 |
| C                           | 8.578399000000  | 2.477472000000  | 0.522019000000  |
| C                           | 7.999825000000  | 1.209261000000  | 0.586289000000  |
| C                           | 7.147782000000  | 0.744390000000  | -0.417587000000 |
| C                           | 6.857603000000  | 1.615710000000  | -1.484521000000 |
| H                           | 7.226255000000  | 3.512899000000  | -2.413545000000 |
| H                           | 8.777812000000  | 4.295650000000  | -0.622782000000 |
| H                           | 9.237476000000  | 2.804446000000  | 1.321686000000  |
| H                           | 8.232806000000  | 0.579932000000  | 1.432248000000  |
| H                           | 6.173807000000  | 1.292289000000  | -2.258288000000 |
| C                           | 6.535856000000  | -0.639217000000 | -0.477795000000 |
| C                           | 5.084818000000  | -0.607175000000 | -0.458826000000 |
| C                           | 4.303850000000  | -1.713987000000 | -0.930316000000 |
| O                           | 4.642192000000  | -2.650172000000 | -1.661605000000 |
| O                           | 3.019220000000  | -1.685647000000 | -0.417443000000 |
| C                           | 2.125058000000  | -2.652524000000 | -0.963272000000 |
| H                           | 2.478833000000  | -3.670729000000 | -0.774306000000 |
| H                           | 2.013902000000  | -2.521222000000 | -2.044505000000 |
| H                           | 1.168506000000  | -2.484333000000 | -0.464391000000 |
| <b>TS<sub>4R/S10R</sub></b> |                 |                 |                 |
| P                           | -2.378235000000 | -1.404363000000 | -0.265257000000 |
| C                           | -3.407310000000 | -0.262766000000 | -1.278074000000 |
| C                           | -4.118262000000 | 0.800172000000  | -0.413806000000 |
| H                           | -4.116782000000 | -0.856129000000 | -1.863167000000 |
| H                           | -2.710051000000 | 0.204362000000  | -1.975543000000 |
| C                           | -4.099502000000 | 2.185480000000  | -1.069763000000 |
| H                           | -5.151295000000 | 0.490230000000  | -0.208200000000 |
| H                           | -3.618580000000 | 0.880452000000  | 0.559123000000  |
| C                           | -4.730123000000 | 3.257348000000  | -0.179358000000 |
| H                           | -3.055377000000 | 2.452566000000  | -1.277440000000 |
| H                           | -4.614392000000 | 2.146411000000  | -2.040135000000 |
| H                           | -4.708203000000 | 4.241300000000  | -0.661567000000 |

|   |                 |                 |                 |
|---|-----------------|-----------------|-----------------|
| H | -5.776727000000 | 3.022144000000  | 0.051996000000  |
| H | -4.185751000000 | 3.334765000000  | 0.769471000000  |
| C | -3.605552000000 | -2.441509000000 | 0.643077000000  |
| C | -4.573650000000 | -3.225248000000 | -0.249672000000 |
| H | -4.156449000000 | -1.776290000000 | 1.317230000000  |
| H | -3.040524000000 | -3.125760000000 | 1.284433000000  |
| C | -5.527816000000 | -4.102383000000 | 0.569108000000  |
| H | -5.164388000000 | -2.535721000000 | -0.866808000000 |
| H | -4.014509000000 | -3.861441000000 | -0.948512000000 |
| C | -6.504421000000 | -4.890225000000 | -0.306600000000 |
| H | -4.939275000000 | -4.795109000000 | 1.185940000000  |
| H | -6.086519000000 | -3.468245000000 | 1.270752000000  |
| H | -7.128313000000 | -4.216925000000 | -0.906745000000 |
| H | -5.968490000000 | -5.550368000000 | -0.999503000000 |
| H | -7.171986000000 | -5.512677000000 | 0.299122000000  |
| C | -1.483042000000 | -2.616384000000 | -1.343572000000 |
| C | -1.872809000000 | -2.623187000000 | -2.824802000000 |
| H | -1.632575000000 | -3.608871000000 | -0.897264000000 |
| H | -0.431552000000 | -2.347832000000 | -1.236657000000 |
| C | -1.043306000000 | -3.633092000000 | -3.625020000000 |
| H | -2.939916000000 | -2.856919000000 | -2.944198000000 |
| H | -1.712988000000 | -1.619198000000 | -3.229339000000 |
| C | -1.408947000000 | -3.652301000000 | -5.110789000000 |
| H | 0.021082000000  | -3.387059000000 | -3.509165000000 |
| H | -1.175793000000 | -4.637339000000 | -3.197715000000 |
| H | -0.798677000000 | -4.373791000000 | -5.665495000000 |
| H | -2.461767000000 | -3.924647000000 | -5.254606000000 |
| H | -1.257499000000 | -2.665648000000 | -5.564502000000 |
| P | -0.861324000000 | 2.084341000000  | 1.833897000000  |
| B | 1.098926000000  | 0.306950000000  | -0.035460000000 |
| O | 1.413354000000  | -1.010539000000 | 0.194087000000  |
| O | 2.187856000000  | 1.089356000000  | -0.298893000000 |
| C | 2.764999000000  | -1.202604000000 | -0.318572000000 |
| C | 3.376462000000  | 0.243424000000  | -0.199495000000 |
| C | 3.451336000000  | -2.263178000000 | 0.530715000000  |
| C | 2.610456000000  | -1.677050000000 | -1.766504000000 |
| C | 4.324051000000  | 0.636153000000  | -1.326038000000 |
| C | 4.019816000000  | 0.532411000000  | 1.157758000000  |
| H | 4.492798000000  | -2.397517000000 | 0.217892000000  |
| H | 3.434697000000  | -2.000289000000 | 1.590502000000  |
| H | 2.934331000000  | -3.220146000000 | 0.409656000000  |
| H | 2.058470000000  | -2.622105000000 | -1.770605000000 |
| H | 2.034579000000  | -0.955544000000 | -2.353143000000 |
| H | 3.581077000000  | -1.842537000000 | -2.244262000000 |

|   |                 |                 |                 |
|---|-----------------|-----------------|-----------------|
| H | 3.833665000000  | 0.576006000000  | -2.299667000000 |
| H | 4.659781000000  | 1.666756000000  | -1.176666000000 |
| H | 5.206526000000  | -0.013633000000 | -1.335662000000 |
| H | 3.351981000000  | 0.276142000000  | 1.983769000000  |
| H | 4.955852000000  | -0.022406000000 | 1.278709000000  |
| H | 4.239131000000  | 1.601620000000  | 1.221836000000  |
| C | -0.063886000000 | 1.450097000000  | 3.374526000000  |
| C | 0.877570000000  | 0.413709000000  | 3.426798000000  |
| C | -0.437486000000 | 2.076605000000  | 4.571128000000  |
| C | 1.419132000000  | 0.005617000000  | 4.644072000000  |
| H | 1.153874000000  | -0.111624000000 | 2.521450000000  |
| C | 0.113976000000  | 1.679723000000  | 5.789226000000  |
| H | -1.175642000000 | 2.874713000000  | 4.547690000000  |
| C | 1.041314000000  | 0.638440000000  | 5.829429000000  |
| H | 2.126012000000  | -0.819312000000 | 4.666543000000  |
| H | -0.189622000000 | 2.175820000000  | 6.707271000000  |
| H | 1.460411000000  | 0.316029000000  | 6.778660000000  |
| C | 0.390820000000  | 3.377679000000  | 1.388662000000  |
| C | -0.066450000000 | 4.498062000000  | 0.677497000000  |
| C | 1.725351000000  | 3.350947000000  | 1.807912000000  |
| C | 0.796033000000  | 5.544571000000  | 0.361230000000  |
| H | -1.103759000000 | 4.535765000000  | 0.358429000000  |
| C | 2.591718000000  | 4.398705000000  | 1.493641000000  |
| H | 2.091778000000  | 2.513253000000  | 2.388622000000  |
| C | 2.132653000000  | 5.495190000000  | 0.765198000000  |
| H | 0.425302000000  | 6.402259000000  | -0.194018000000 |
| H | 3.626656000000  | 4.358561000000  | 1.824526000000  |
| H | 2.806677000000  | 6.312915000000  | 0.524011000000  |
| C | -0.512502000000 | -3.056332000000 | 3.680986000000  |
| C | -1.254491000000 | -2.596179000000 | 4.769852000000  |
| C | -2.075980000000 | -1.477674000000 | 4.620103000000  |
| C | -2.154513000000 | -0.827469000000 | 3.389822000000  |
| C | -1.392861000000 | -1.254613000000 | 2.291018000000  |
| C | -0.579429000000 | -2.388577000000 | 2.457824000000  |
| H | 0.129820000000  | -3.927038000000 | 3.788703000000  |
| H | -1.193393000000 | -3.104676000000 | 5.728290000000  |
| H | -2.655658000000 | -1.110824000000 | 5.462719000000  |
| H | -2.795272000000 | 0.041676000000  | 3.273740000000  |
| H | 0.030552000000  | -2.711890000000 | 1.620114000000  |
| C | -1.458882000000 | -0.560807000000 | 0.969911000000  |
| C | -0.780189000000 | 0.649684000000  | 0.637572000000  |
| C | -0.448675000000 | 0.897915000000  | -0.762323000000 |
| O | -0.569081000000 | 0.046252000000  | -1.717481000000 |
| O | -0.419429000000 | 2.250643000000  | -1.080478000000 |



|                            |                 |                 |                 |
|----------------------------|-----------------|-----------------|-----------------|
| C                          | 0.244075000000  | 2.586389000000  | -2.295236000000 |
| H                          | 1.315243000000  | 2.376096000000  | -2.215593000000 |
| H                          | -0.182376000000 | 2.032452000000  | -3.135663000000 |
| H                          | 0.091869000000  | 3.659685000000  | -2.424621000000 |
| <b>TS<sub>4R/S11</sub></b> |                 |                 |                 |
| P                          | -1.928313000000 | -1.440102000000 | -0.693780000000 |
| C                          | -3.745887000000 | -1.452949000000 | -0.312456000000 |
| C                          | -4.027665000000 | -1.495459000000 | 1.194295000000  |
| H                          | -4.241251000000 | -2.287766000000 | -0.824972000000 |
| H                          | -4.155373000000 | -0.529413000000 | -0.736117000000 |
| C                          | -5.496754000000 | -1.221707000000 | 1.527665000000  |
| H                          | -3.737374000000 | -2.474801000000 | 1.600666000000  |
| H                          | -3.397253000000 | -0.755113000000 | 1.698629000000  |
| C                          | -5.771169000000 | -1.243127000000 | 3.032893000000  |
| H                          | -5.771999000000 | -0.242253000000 | 1.114344000000  |
| H                          | -6.133456000000 | -1.961608000000 | 1.022064000000  |
| H                          | -5.167771000000 | -0.487622000000 | 3.550794000000  |
| H                          | -6.825116000000 | -1.040591000000 | 3.254602000000  |
| H                          | -5.519193000000 | -2.218760000000 | 3.466683000000  |
| C                          | -1.364889000000 | -3.099921000000 | -0.068727000000 |
| C                          | -2.238119000000 | -4.320870000000 | -0.370059000000 |
| H                          | -1.222108000000 | -2.979369000000 | 1.008922000000  |
| H                          | -0.360439000000 | -3.246476000000 | -0.475252000000 |
| C                          | -1.604342000000 | -5.634625000000 | 0.116057000000  |
| H                          | -3.223072000000 | -4.205163000000 | 0.100013000000  |
| H                          | -2.417899000000 | -4.393465000000 | -1.450227000000 |
| C                          | -1.389215000000 | -5.696581000000 | 1.631929000000  |
| H                          | -2.245304000000 | -6.471500000000 | -0.191598000000 |
| H                          | -0.642119000000 | -5.780818000000 | -0.395518000000 |
| H                          | -1.014508000000 | -6.679738000000 | 1.937437000000  |
| H                          | -0.663502000000 | -4.948505000000 | 1.969688000000  |
| H                          | -2.328623000000 | -5.515285000000 | 2.169272000000  |
| C                          | -1.939579000000 | -1.656097000000 | -2.545786000000 |
| C                          | -0.521735000000 | -1.616418000000 | -3.131217000000 |
| H                          | -2.528985000000 | -0.818472000000 | -2.940564000000 |
| H                          | -2.466724000000 | -2.576486000000 | -2.827053000000 |
| C                          | -0.484059000000 | -1.572837000000 | -4.664873000000 |
| H                          | 0.008377000000  | -0.742139000000 | -2.732500000000 |
| H                          | 0.037426000000  | -2.496371000000 | -2.785709000000 |
| C                          | -1.068200000000 | -2.817309000000 | -5.339565000000 |
| H                          | -1.022888000000 | -0.679511000000 | -5.010920000000 |
| H                          | 0.558167000000  | -1.443694000000 | -4.985087000000 |
| H                          | -2.134523000000 | -2.935639000000 | -5.117376000000 |
| H                          | -0.962440000000 | -2.765314000000 | -6.428991000000 |

|   |                 |                 |                 |
|---|-----------------|-----------------|-----------------|
| H | -0.555812000000 | -3.725464000000 | -4.997224000000 |
| P | -0.401476000000 | 1.697964000000  | 2.172914000000  |
| B | 1.238607000000  | -0.099076000000 | 0.571306000000  |
| O | 2.555010000000  | 0.246343000000  | 0.757242000000  |
| O | 1.051995000000  | -1.448978000000 | 0.483730000000  |
| C | 3.308821000000  | -0.970090000000 | 1.011474000000  |
| C | 2.363006000000  | -2.079043000000 | 0.416843000000  |
| C | 4.662633000000  | -0.842367000000 | 0.323030000000  |
| C | 3.488672000000  | -1.074360000000 | 2.526516000000  |
| C | 2.309359000000  | -3.374029000000 | 1.220114000000  |
| C | 2.630115000000  | -2.369860000000 | -1.062009000000 |
| H | 5.239418000000  | -1.768169000000 | 0.426388000000  |
| H | 4.552482000000  | -0.611089000000 | -0.738088000000 |
| H | 5.233291000000  | -0.033671000000 | 0.789924000000  |
| H | 2.530072000000  | -1.162439000000 | 3.038644000000  |
| H | 4.112008000000  | -1.933866000000 | 2.793826000000  |
| H | 3.979865000000  | -0.166377000000 | 2.888844000000  |
| H | 1.625105000000  | -4.079455000000 | 0.738624000000  |
| H | 3.299097000000  | -3.841145000000 | 1.268669000000  |
| H | 1.952265000000  | -3.194989000000 | 2.236111000000  |
| H | 1.849767000000  | -3.033986000000 | -1.443809000000 |
| H | 2.607343000000  | -1.449202000000 | -1.652120000000 |
| H | 3.597218000000  | -2.861695000000 | -1.205521000000 |
| C | 0.133109000000  | 0.400138000000  | 3.360920000000  |
| C | -0.379576000000 | -0.903846000000 | 3.253703000000  |
| C | 0.964557000000  | 0.708188000000  | 4.449225000000  |
| C | -0.046018000000 | -1.877302000000 | 4.193071000000  |
| H | -1.031564000000 | -1.134929000000 | 2.421254000000  |
| C | 1.284898000000  | -0.265818000000 | 5.395528000000  |
| H | 1.368548000000  | 1.708748000000  | 4.554379000000  |
| C | 0.789258000000  | -1.564017000000 | 5.268088000000  |
| H | -0.445246000000 | -2.882953000000 | 4.086018000000  |
| H | 1.933381000000  | -0.009412000000 | 6.228945000000  |
| H | 1.047863000000  | -2.323163000000 | 6.001123000000  |
| C | 0.785797000000  | 3.094750000000  | 2.518292000000  |
| C | 0.237501000000  | 4.253069000000  | 3.082040000000  |
| C | 2.157148000000  | 3.059439000000  | 2.224160000000  |
| C | 1.043531000000  | 5.358101000000  | 3.362353000000  |
| H | -0.828076000000 | 4.289561000000  | 3.294300000000  |
| C | 2.958813000000  | 4.167095000000  | 2.497151000000  |
| H | 2.591004000000  | 2.170031000000  | 1.780834000000  |
| C | 2.406072000000  | 5.316799000000  | 3.067680000000  |
| H | 0.606533000000  | 6.250115000000  | 3.803327000000  |
| H | 4.019915000000  | 4.133885000000  | 2.262754000000  |

|                             |                 |                 |                 |
|-----------------------------|-----------------|-----------------|-----------------|
| H                           | 3.035470000000  | 6.177394000000  | 3.278079000000  |
| C                           | -3.487968000000 | 2.255518000000  | -2.053669000000 |
| C                           | -4.585142000000 | 2.683035000000  | -1.306207000000 |
| C                           | -4.575470000000 | 2.510339000000  | 0.081768000000  |
| C                           | -3.492163000000 | 1.899968000000  | 0.706433000000  |
| C                           | -2.376346000000 | 1.459209000000  | -0.028612000000 |
| C                           | -2.393097000000 | 1.664124000000  | -1.421879000000 |
| H                           | -3.480636000000 | 2.381016000000  | -3.133599000000 |
| H                           | -5.437876000000 | 3.144691000000  | -1.796039000000 |
| H                           | -5.421855000000 | 2.842632000000  | 0.677209000000  |
| H                           | -3.490461000000 | 1.752777000000  | 1.781560000000  |
| H                           | -1.550030000000 | 1.329705000000  | -2.016955000000 |
| C                           | -1.327246000000 | 0.649288000000  | 0.657986000000  |
| C                           | 0.121340000000  | 1.005711000000  | 0.468774000000  |
| C                           | 0.492370000000  | 1.965180000000  | -0.639079000000 |
| O                           | 1.023549000000  | 1.605716000000  | -1.677267000000 |
| O                           | 0.108323000000  | 3.229698000000  | -0.405442000000 |
| C                           | 0.302398000000  | 4.158100000000  | -1.479526000000 |
| H                           | -0.354391000000 | 3.903273000000  | -2.315900000000 |
| H                           | 0.038871000000  | 5.133333000000  | -1.070694000000 |
| H                           | 1.341768000000  | 4.143572000000  | -1.815273000000 |
| <b>TS<sub>S7S/S12</sub></b> |                 |                 |                 |
| P                           | 1.148796000000  | -0.249752000000 | -0.934789000000 |
| C                           | -0.474324000000 | -1.098075000000 | -0.980392000000 |
| C                           | -0.689834000000 | -2.080529000000 | 0.182746000000  |
| H                           | -0.582111000000 | -1.610307000000 | -1.944742000000 |
| H                           | -1.219552000000 | -0.301159000000 | -0.941898000000 |
| C                           | -2.161742000000 | -2.491026000000 | 0.291494000000  |
| H                           | -0.065287000000 | -2.972253000000 | 0.030583000000  |
| H                           | -0.374629000000 | -1.630397000000 | 1.129029000000  |
| C                           | -2.389814000000 | -3.516662000000 | 1.401525000000  |
| H                           | -2.756167000000 | -1.594983000000 | 0.502168000000  |
| H                           | -2.506263000000 | -2.894312000000 | -0.671851000000 |
| H                           | -1.823993000000 | -4.439141000000 | 1.219181000000  |
| H                           | -2.073160000000 | -3.106275000000 | 2.365249000000  |
| H                           | -3.449152000000 | -3.784428000000 | 1.484214000000  |
| C                           | 1.507487000000  | 0.654695000000  | -2.484669000000 |
| C                           | 0.658002000000  | 0.267163000000  | -3.703656000000 |
| H                           | 2.576291000000  | 0.524352000000  | -2.696277000000 |
| H                           | 1.334602000000  | 1.706070000000  | -2.232655000000 |
| C                           | 0.960219000000  | 1.133715000000  | -4.935745000000 |
| H                           | 0.820259000000  | -0.789931000000 | -3.950772000000 |
| H                           | -0.399351000000 | 0.379265000000  | -3.439225000000 |
| C                           | 0.563456000000  | 2.604599000000  | -4.771997000000 |

|   |                 |                 |                 |
|---|-----------------|-----------------|-----------------|
| H | 2.029527000000  | 1.059676000000  | -5.179756000000 |
| H | 0.421307000000  | 0.708825000000  | -5.792727000000 |
| H | -0.501066000000 | 2.698070000000  | -4.530058000000 |
| H | 1.124314000000  | 3.095505000000  | -3.970240000000 |
| H | 0.752102000000  | 3.162789000000  | -5.695765000000 |
| C | 2.447289000000  | -1.537781000000 | -0.740205000000 |
| C | 2.512743000000  | -2.573245000000 | -1.875124000000 |
| H | 2.263114000000  | -2.028544000000 | 0.222142000000  |
| H | 3.403575000000  | -1.008050000000 | -0.645397000000 |
| C | 3.604536000000  | -3.624497000000 | -1.641503000000 |
| H | 1.541337000000  | -3.075485000000 | -1.971230000000 |
| H | 2.694910000000  | -2.064192000000 | -2.830699000000 |
| C | 3.677582000000  | -4.657802000000 | -2.767916000000 |
| H | 4.574350000000  | -3.119255000000 | -1.537072000000 |
| H | 3.416508000000  | -4.130104000000 | -0.684701000000 |
| H | 3.895572000000  | -4.178623000000 | -3.729903000000 |
| H | 4.461610000000  | -5.398727000000 | -2.578415000000 |
| H | 2.727584000000  | -5.195428000000 | -2.872496000000 |
| P | -1.141021000000 | 2.540247000000  | -1.164343000000 |
| B | -1.806658000000 | 0.864855000000  | 2.700688000000  |
| O | -2.617415000000 | -0.246567000000 | 2.752239000000  |
| O | -1.719920000000 | 1.523749000000  | 3.902170000000  |
| C | -3.315709000000 | -0.208211000000 | 4.026717000000  |
| C | -2.359199000000 | 0.682506000000  | 4.898859000000  |
| C | -4.676915000000 | 0.439770000000  | 3.759206000000  |
| C | -3.498967000000 | -1.634002000000 | 4.531560000000  |
| C | -1.238712000000 | -0.117600000000 | 5.570578000000  |
| C | -3.065377000000 | 1.579580000000  | 5.907193000000  |
| H | -5.302024000000 | 0.446989000000  | 4.658539000000  |
| H | -4.566793000000 | 1.463587000000  | 3.395649000000  |
| H | -5.191704000000 | -0.132496000000 | 2.982291000000  |
| H | -4.151812000000 | -2.185000000000 | 3.847783000000  |
| H | -2.547368000000 | -2.165791000000 | 4.594297000000  |
| H | -3.966768000000 | -1.634245000000 | 5.522719000000  |
| H | -0.725501000000 | -0.749582000000 | 4.840053000000  |
| H | -0.507279000000 | 0.582361000000  | 5.985954000000  |
| H | -1.617249000000 | -0.746360000000 | 6.383159000000  |
| H | -2.326363000000 | 2.175508000000  | 6.452039000000  |
| H | -3.754632000000 | 2.263703000000  | 5.408433000000  |
| H | -3.625878000000 | 0.981619000000  | 6.634714000000  |
| C | -2.627462000000 | 3.135883000000  | -2.076239000000 |
| C | -3.290192000000 | 4.335771000000  | -1.777960000000 |
| C | -3.145510000000 | 2.317141000000  | -3.088665000000 |
| C | -4.447374000000 | 4.695870000000  | -2.463705000000 |

|            |                 |                 |                 |
|------------|-----------------|-----------------|-----------------|
| H          | -2.905013000000 | 4.975764000000  | -0.991552000000 |
| C          | -4.307482000000 | 2.672927000000  | -3.775480000000 |
| H          | -2.638305000000 | 1.385889000000  | -3.331524000000 |
| C          | -4.961542000000 | 3.864097000000  | -3.461706000000 |
| H          | -4.956734000000 | 5.622386000000  | -2.212651000000 |
| H          | -4.698387000000 | 2.023818000000  | -4.554749000000 |
| H          | -5.866647000000 | 4.145661000000  | -3.993160000000 |
| C          | -0.299473000000 | 4.137348000000  | -0.765663000000 |
| C          | -0.003555000000 | 5.043474000000  | -1.797745000000 |
| C          | 0.159442000000  | 4.416564000000  | 0.529031000000  |
| C          | 0.714404000000  | 6.209284000000  | -1.538010000000 |
| H          | -0.359966000000 | 4.845470000000  | -2.805255000000 |
| C          | 0.887975000000  | 5.579869000000  | 0.784403000000  |
| H          | -0.046414000000 | 3.715592000000  | 1.330287000000  |
| C          | 1.165396000000  | 6.480872000000  | -0.243797000000 |
| H          | 0.919091000000  | 6.908617000000  | -2.344904000000 |
| H          | 1.236079000000  | 5.783474000000  | 1.794019000000  |
| H          | 1.727861000000  | 7.388245000000  | -0.040417000000 |
| C          | -4.709286000000 | 3.867609000000  | 2.068919000000  |
| C          | -5.821010000000 | 3.289930000000  | 1.453830000000  |
| C          | -5.634635000000 | 2.269507000000  | 0.518182000000  |
| C          | -4.349900000000 | 1.837055000000  | 0.199820000000  |
| C          | -3.217035000000 | 2.415734000000  | 0.796062000000  |
| C          | -3.422824000000 | 3.435800000000  | 1.741570000000  |
| H          | -4.841415000000 | 4.661796000000  | 2.799674000000  |
| H          | -6.823135000000 | 3.629091000000  | 1.702215000000  |
| H          | -6.493418000000 | 1.808343000000  | 0.037326000000  |
| H          | -4.207717000000 | 1.044742000000  | -0.528408000000 |
| H          | -2.557632000000 | 3.891758000000  | 2.211903000000  |
| C          | -1.835382000000 | 1.995455000000  | 0.434821000000  |
| C          | -1.082396000000 | 1.315627000000  | 1.387583000000  |
| C          | 0.286316000000  | 0.993687000000  | 1.408191000000  |
| O          | 1.139381000000  | 1.084358000000  | 0.376988000000  |
| O          | 0.652039000000  | 0.034358000000  | 2.363377000000  |
| C          | 1.784157000000  | 0.402336000000  | 3.146311000000  |
| H          | 1.555149000000  | 1.287157000000  | 3.752354000000  |
| H          | 2.008608000000  | -0.445934000000 | 3.799477000000  |
| H          | 2.650551000000  | 0.613811000000  | 2.508482000000  |
| <b>5'R</b> |                 |                 |                 |
| P          | -1.484591000000 | -0.981202000000 | -0.887296000000 |
| C          | -3.323497000000 | -1.209828000000 | -1.049812000000 |
| C          | -4.325077000000 | -0.066818000000 | -0.876727000000 |
| H          | -3.545419000000 | -2.001336000000 | -0.324687000000 |
| H          | -3.457650000000 | -1.666129000000 | -2.038001000000 |

|   |                 |                 |                 |
|---|-----------------|-----------------|-----------------|
| C | -5.756795000000 | -0.607469000000 | -0.776587000000 |
| H | -4.091203000000 | 0.515622000000  | 0.020059000000  |
| H | -4.242164000000 | 0.629913000000  | -1.712526000000 |
| C | -6.791387000000 | 0.511359000000  | -0.635675000000 |
| H | -5.985605000000 | -1.211065000000 | -1.666829000000 |
| H | -5.833086000000 | -1.290130000000 | 0.081996000000  |
| H | -7.808791000000 | 0.111715000000  | -0.560793000000 |
| H | -6.599705000000 | 1.112212000000  | 0.261408000000  |
| H | -6.758606000000 | 1.187451000000  | -1.498372000000 |
| C | -1.120032000000 | -2.807821000000 | -0.644217000000 |
| C | -1.465356000000 | -3.724729000000 | -1.827330000000 |
| H | -1.651237000000 | -3.155619000000 | 0.243579000000  |
| H | -0.054966000000 | -2.897040000000 | -0.438540000000 |
| C | -1.032583000000 | -5.173720000000 | -1.569631000000 |
| H | -2.544057000000 | -3.709112000000 | -2.026681000000 |
| H | -0.977524000000 | -3.371765000000 | -2.744413000000 |
| C | -1.372799000000 | -6.109655000000 | -2.731391000000 |
| H | 0.049428000000  | -5.196979000000 | -1.380083000000 |
| H | -1.511852000000 | -5.534957000000 | -0.649301000000 |
| H | -2.453012000000 | -6.127184000000 | -2.920201000000 |
| H | -0.880799000000 | -5.784876000000 | -3.656300000000 |
| H | -1.052982000000 | -7.137078000000 | -2.525807000000 |
| C | -0.481211000000 | -0.700167000000 | -2.415698000000 |
| C | -1.303394000000 | -0.587308000000 | -3.703241000000 |
| H | 0.245894000000  | -1.514744000000 | -2.483418000000 |
| H | 0.079694000000  | 0.220208000000  | -2.244969000000 |
| C | -0.416785000000 | -0.296854000000 | -4.918930000000 |
| H | -1.862234000000 | -1.516003000000 | -3.882826000000 |
| H | -2.037326000000 | 0.214311000000  | -3.581803000000 |
| C | -1.218932000000 | -0.181830000000 | -6.216976000000 |
| H | 0.136750000000  | 0.635209000000  | -4.741563000000 |
| H | 0.339100000000  | -1.088480000000 | -5.019511000000 |
| H | -0.569174000000 | 0.033995000000  | -7.072235000000 |
| H | -1.757238000000 | -1.112996000000 | -6.432403000000 |
| H | -1.961998000000 | 0.621677000000  | -6.148995000000 |
| P | -0.002890000000 | 2.574712000000  | 1.664332000000  |
| B | 0.642514000000  | -0.792186000000 | 0.946455000000  |
| O | 1.174434000000  | -1.112091000000 | 2.164236000000  |
| O | 1.492531000000  | -1.092874000000 | -0.092613000000 |
| C | 2.539130000000  | -1.592276000000 | 1.987831000000  |
| C | 2.634313000000  | -1.834069000000 | 0.425939000000  |
| C | 3.489782000000  | -0.510454000000 | 2.497811000000  |
| C | 2.686825000000  | -2.846463000000 | 2.846667000000  |
| C | 2.452585000000  | -3.300104000000 | 0.018346000000  |

|   |                 |                 |                 |
|---|-----------------|-----------------|-----------------|
| C | 3.895117000000  | -1.288771000000 | -0.236218000000 |
| H | 4.532025000000  | -0.825565000000 | 2.386966000000  |
| H | 3.350996000000  | 0.432987000000  | 1.971157000000  |
| H | 3.300812000000  | -0.341497000000 | 3.561407000000  |
| H | 2.551681000000  | -2.576522000000 | 3.898069000000  |
| H | 1.940893000000  | -3.603980000000 | 2.597395000000  |
| H | 3.684410000000  | -3.283885000000 | 2.732240000000  |
| H | 1.568448000000  | -3.751202000000 | 0.473866000000  |
| H | 2.342956000000  | -3.357646000000 | -1.069130000000 |
| H | 3.324089000000  | -3.896218000000 | 0.306075000000  |
| H | 4.022087000000  | -0.223746000000 | -0.047973000000 |
| H | 4.781374000000  | -1.821514000000 | 0.125214000000  |
| H | 3.826196000000  | -1.440398000000 | -1.318294000000 |
| C | -0.184795000000 | 2.032897000000  | 3.418647000000  |
| C | 0.807831000000  | 1.427267000000  | 4.200016000000  |
| C | -1.405678000000 | 2.355046000000  | 4.034890000000  |
| C | 0.584477000000  | 1.137919000000  | 5.546531000000  |
| H | 1.757758000000  | 1.173134000000  | 3.751050000000  |
| C | -1.638654000000 | 2.053363000000  | 5.374966000000  |
| H | -2.178416000000 | 2.846971000000  | 3.449082000000  |
| C | -0.641428000000 | 1.442316000000  | 6.138853000000  |
| H | 1.368974000000  | 0.664321000000  | 6.132055000000  |
| H | -2.593700000000 | 2.306804000000  | 5.828271000000  |
| H | -0.815719000000 | 1.215328000000  | 7.187117000000  |
| C | 1.817080000000  | 2.531757000000  | 1.365106000000  |
| C | 2.719394000000  | 3.126845000000  | 2.266867000000  |
| C | 2.308595000000  | 2.132198000000  | 0.113052000000  |
| C | 4.067672000000  | 3.269558000000  | 1.946351000000  |
| H | 2.361854000000  | 3.479327000000  | 3.229949000000  |
| C | 3.653928000000  | 2.298198000000  | -0.218683000000 |
| H | 1.622251000000  | 1.687465000000  | -0.600535000000 |
| C | 4.544980000000  | 2.853986000000  | 0.700314000000  |
| H | 4.747460000000  | 3.715808000000  | 2.667875000000  |
| H | 4.007328000000  | 1.986817000000  | -1.198787000000 |
| H | 5.594192000000  | 2.975299000000  | 0.445603000000  |
| C | -0.822827000000 | -0.195501000000 | 0.726964000000  |
| C | -0.744485000000 | 1.341314000000  | 0.578202000000  |
| C | -1.407579000000 | 1.860814000000  | -0.530703000000 |
| O | -1.994028000000 | 1.139831000000  | -1.401068000000 |
| O | -1.403241000000 | 3.211558000000  | -0.730458000000 |
| C | -2.104546000000 | 3.676885000000  | -1.878385000000 |
| H | -1.682738000000 | 3.263704000000  | -2.800768000000 |
| H | -3.167128000000 | 3.415180000000  | -1.833779000000 |
| H | -1.987405000000 | 4.762216000000  | -1.867228000000 |

|            |                 |                 |                 |
|------------|-----------------|-----------------|-----------------|
| C          | -1.864957000000 | -0.619419000000 | 1.781487000000  |
| C          | -1.941282000000 | -1.995043000000 | 2.423936000000  |
| C          | -1.606679000000 | -0.793230000000 | 3.256397000000  |
| H          | -2.832247000000 | -0.167761000000 | 1.575917000000  |
| H          | -1.122886000000 | -2.685538000000 | 2.246363000000  |
| H          | -2.914756000000 | -2.470999000000 | 2.517116000000  |
| H          | -2.354015000000 | -0.389498000000 | 3.930312000000  |
| H          | -0.590878000000 | -0.712407000000 | 3.613679000000  |
| <b>5'S</b> |                 |                 |                 |
| P          | -1.918037000000 | -0.006026000000 | -0.099821000000 |
| C          | -3.372011000000 | -0.040317000000 | -1.266585000000 |
| C          | -3.883438000000 | 1.172207000000  | -2.039777000000 |
| H          | -3.120941000000 | -0.842734000000 | -1.967044000000 |
| H          | -4.182166000000 | -0.439402000000 | -0.644512000000 |
| C          | -5.111004000000 | 0.800044000000  | -2.881003000000 |
| H          | -3.095786000000 | 1.564979000000  | -2.686234000000 |
| H          | -4.138649000000 | 1.983603000000  | -1.352623000000 |
| C          | -5.650869000000 | 1.989114000000  | -3.679071000000 |
| H          | -5.902311000000 | 0.405763000000  | -2.227025000000 |
| H          | -4.849290000000 | -0.016699000000 | -3.568873000000 |
| H          | -6.525731000000 | 1.709206000000  | -4.276311000000 |
| H          | -4.888617000000 | 2.380657000000  | -4.363164000000 |
| H          | -5.947691000000 | 2.807635000000  | -3.012238000000 |
| C          | -2.178403000000 | -1.824373000000 | 0.389759000000  |
| C          | -3.342905000000 | -2.144266000000 | 1.335718000000  |
| H          | -2.311819000000 | -2.383090000000 | -0.544331000000 |
| H          | -1.259963000000 | -2.222618000000 | 0.824775000000  |
| C          | -3.473613000000 | -3.648959000000 | 1.603358000000  |
| H          | -4.293546000000 | -1.775763000000 | 0.928888000000  |
| H          | -3.205636000000 | -1.629054000000 | 2.294523000000  |
| C          | -4.608500000000 | -3.982784000000 | 2.573710000000  |
| H          | -2.522284000000 | -4.027165000000 | 2.004115000000  |
| H          | -3.630766000000 | -4.172974000000 | 0.650837000000  |
| H          | -5.574515000000 | -3.640262000000 | 2.183419000000  |
| H          | -4.452663000000 | -3.496303000000 | 3.544267000000  |
| H          | -4.682545000000 | -5.061650000000 | 2.748496000000  |
| C          | -2.178969000000 | 0.847995000000  | 1.514009000000  |
| C          | -3.520466000000 | 1.575798000000  | 1.632431000000  |
| H          | -2.066180000000 | 0.110905000000  | 2.311885000000  |
| H          | -1.349744000000 | 1.550676000000  | 1.614788000000  |
| C          | -3.672709000000 | 2.268544000000  | 2.990556000000  |
| H          | -4.352054000000 | 0.871161000000  | 1.494345000000  |
| H          | -3.590896000000 | 2.317557000000  | 0.831244000000  |
| C          | -5.003080000000 | 3.012336000000  | 3.125789000000  |



|   |                 |                 |                 |
|---|-----------------|-----------------|-----------------|
| H | -2.839267000000 | 2.970677000000  | 3.128855000000  |
| H | -3.581545000000 | 1.522935000000  | 3.792960000000  |
| H | -5.090266000000 | 3.504397000000  | 4.100677000000  |
| H | -5.851721000000 | 2.325404000000  | 3.020521000000  |
| H | -5.102874000000 | 3.782342000000  | 2.351446000000  |
| P | 2.228487000000  | 1.814779000000  | -0.934085000000 |
| B | 0.598316000000  | -0.858373000000 | 0.608386000000  |
| O | 1.170108000000  | -2.104176000000 | 0.535503000000  |
| O | 0.585414000000  | -0.355160000000 | 1.879764000000  |
| C | 1.734924000000  | -2.437343000000 | 1.837665000000  |
| C | 1.060553000000  | -1.377587000000 | 2.799864000000  |
| C | 3.252698000000  | -2.284804000000 | 1.722941000000  |
| C | 1.380433000000  | -3.891306000000 | 2.134999000000  |
| C | -0.166913000000 | -1.902687000000 | 3.552118000000  |
| C | 2.016686000000  | -0.730247000000 | 3.793421000000  |
| H | 3.747321000000  | -2.571902000000 | 2.656096000000  |
| H | 3.539067000000  | -1.259745000000 | 1.480292000000  |
| H | 3.617386000000  | -2.939683000000 | 0.925797000000  |
| H | 1.852958000000  | -4.539209000000 | 1.390731000000  |
| H | 0.302400000000  | -4.063948000000 | 2.096532000000  |
| H | 1.746468000000  | -4.185513000000 | 3.124442000000  |
| H | -0.899645000000 | -2.359931000000 | 2.884871000000  |
| H | -0.650215000000 | -1.064090000000 | 4.062316000000  |
| H | 0.118387000000  | -2.642540000000 | 4.306296000000  |
| H | 2.852120000000  | -0.240361000000 | 3.297414000000  |
| H | 2.404028000000  | -1.480347000000 | 4.492324000000  |
| H | 1.482430000000  | 0.030486000000  | 4.369215000000  |
| C | 3.294385000000  | 0.570378000000  | -1.800873000000 |
| C | 3.372947000000  | -0.804666000000 | -1.532316000000 |
| C | 4.126904000000  | 1.094794000000  | -2.802062000000 |
| C | 4.246906000000  | -1.624722000000 | -2.243374000000 |
| H | 2.734271000000  | -1.250743000000 | -0.784898000000 |
| C | 5.006949000000  | 0.277248000000  | -3.514929000000 |
| H | 4.077905000000  | 2.157800000000  | -3.021954000000 |
| C | 5.068856000000  | -1.087198000000 | -3.236812000000 |
| H | 4.283185000000  | -2.688912000000 | -2.022825000000 |
| H | 5.640892000000  | 0.707375000000  | -4.285831000000 |
| H | 5.750229000000  | -1.728479000000 | -3.789725000000 |
| C | 2.903558000000  | 1.741758000000  | 0.788687000000  |
| C | 4.211477000000  | 1.324468000000  | 1.080447000000  |
| C | 2.168309000000  | 2.372590000000  | 1.807501000000  |
| C | 4.766436000000  | 1.536145000000  | 2.346056000000  |
| H | 4.805828000000  | 0.842144000000  | 0.310449000000  |
| C | 2.722852000000  | 2.592344000000  | 3.064142000000  |

|   |                 |                 |                 |
|---|-----------------|-----------------|-----------------|
| H | 1.154271000000  | 2.700294000000  | 1.596260000000  |
| C | 4.029207000000  | 2.177477000000  | 3.341271000000  |
| H | 5.781157000000  | 1.202341000000  | 2.549311000000  |
| H | 2.135194000000  | 3.086492000000  | 3.834150000000  |
| H | 4.464033000000  | 2.350358000000  | 4.321974000000  |
| C | -0.083006000000 | -0.125603000000 | -0.631724000000 |
| C | 0.505879000000  | 1.268675000000  | -0.850205000000 |
| C | -0.451658000000 | 2.268435000000  | -0.938352000000 |
| O | -1.703544000000 | 2.038072000000  | -0.793374000000 |
| O | -0.072324000000 | 3.561566000000  | -1.139251000000 |
| C | -1.121027000000 | 4.524527000000  | -1.181959000000 |
| H | -1.675601000000 | 4.554744000000  | -0.237947000000 |
| H | -1.825777000000 | 4.315202000000  | -1.993254000000 |
| H | -0.625709000000 | 5.481854000000  | -1.354616000000 |
| C | -0.104924000000 | -1.034238000000 | -1.884066000000 |
| C | -0.827429000000 | -0.623421000000 | -3.154518000000 |
| C | 0.666334000000  | -0.725184000000 | -3.141701000000 |
| H | -0.161153000000 | -2.093430000000 | -1.647682000000 |
| H | -1.235809000000 | 0.382424000000  | -3.184819000000 |
| H | -1.416433000000 | -1.368242000000 | -3.684129000000 |
| H | 1.155092000000  | -1.553687000000 | -3.645282000000 |
| H | 1.211909000000  | 0.207780000000  | -3.177424000000 |

**TS<sub>S/R7E</sub>**

|   |                 |                 |                 |
|---|-----------------|-----------------|-----------------|
| P | 0.537175000000  | -1.963589000000 | -0.052693000000 |
| C | -0.194466000000 | -3.180385000000 | 1.142369000000  |
| C | -1.387477000000 | -3.926101000000 | 0.536956000000  |
| H | -0.528070000000 | -2.598897000000 | 2.006864000000  |
| H | 0.566140000000  | -3.889919000000 | 1.489570000000  |
| C | -2.055006000000 | -4.882716000000 | 1.530000000000  |
| H | -2.124525000000 | -3.192410000000 | 0.188197000000  |
| H | -1.070602000000 | -4.493206000000 | -0.348870000000 |
| C | -3.305350000000 | -5.551866000000 | 0.954943000000  |
| H | -1.330374000000 | -5.648969000000 | 1.837793000000  |
| H | -2.318345000000 | -4.328300000000 | 2.440478000000  |
| H | -3.762333000000 | -6.238225000000 | 1.676187000000  |
| H | -4.060217000000 | -4.804452000000 | 0.680271000000  |
| H | -3.066699000000 | -6.125585000000 | 0.051241000000  |
| C | 2.024239000000  | -1.244033000000 | 0.782955000000  |
| C | 2.489497000000  | -1.862551000000 | 2.103311000000  |
| H | 1.797398000000  | -0.184780000000 | 0.945623000000  |
| H | 2.824162000000  | -1.259203000000 | 0.035734000000  |
| C | 3.807839000000  | -1.236381000000 | 2.572909000000  |
| H | 1.720999000000  | -1.709430000000 | 2.872028000000  |
| H | 2.620665000000  | -2.948177000000 | 2.006068000000  |

|   |                 |                 |                 |
|---|-----------------|-----------------|-----------------|
| C | 4.217463000000  | -1.694731000000 | 3.973250000000  |
| H | 4.597772000000  | -1.487700000000 | 1.851307000000  |
| H | 3.710297000000  | -0.144784000000 | 2.559475000000  |
| H | 3.465454000000  | -1.398468000000 | 4.714892000000  |
| H | 4.320507000000  | -2.785842000000 | 4.023382000000  |
| H | 5.174424000000  | -1.254426000000 | 4.275175000000  |
| C | 1.233206000000  | -3.006846000000 | -1.413350000000 |
| C | 2.209200000000  | -4.110345000000 | -0.992420000000 |
| H | 1.714479000000  | -2.287410000000 | -2.083464000000 |
| H | 0.389577000000  | -3.435045000000 | -1.968937000000 |
| C | 2.784391000000  | -4.870989000000 | -2.193081000000 |
| H | 3.035329000000  | -3.673174000000 | -0.415913000000 |
| H | 1.709097000000  | -4.823099000000 | -0.322578000000 |
| C | 3.764690000000  | -5.972139000000 | -1.782722000000 |
| H | 1.958801000000  | -5.307003000000 | -2.772746000000 |
| H | 3.284670000000  | -4.158037000000 | -2.862087000000 |
| H | 4.162741000000  | -6.500841000000 | -2.655892000000 |
| H | 4.614348000000  | -5.555976000000 | -1.227931000000 |
| H | 3.278569000000  | -6.712990000000 | -1.136085000000 |
| P | -0.391421000000 | 2.218680000000  | 0.456709000000  |
| B | -1.966496000000 | -0.074048000000 | -0.018439000000 |
| O | -3.198050000000 | 0.321347000000  | -0.469552000000 |
| O | -2.010638000000 | -0.628971000000 | 1.244160000000  |
| C | -4.191873000000 | -0.088701000000 | 0.505115000000  |
| C | -3.330183000000 | -0.354198000000 | 1.798642000000  |
| C | -5.220197000000 | 1.028546000000  | 0.640319000000  |
| C | -4.853048000000 | -1.349255000000 | -0.061440000000 |
| C | -3.764741000000 | -1.564295000000 | 2.618048000000  |
| C | -3.195826000000 | 0.870190000000  | 2.706817000000  |
| H | -5.743022000000 | 1.159858000000  | -0.311876000000 |
| H | -5.963401000000 | 0.784261000000  | 1.407558000000  |
| H | -4.744456000000 | 1.976311000000  | 0.898681000000  |
| H | -5.660729000000 | -1.709161000000 | 0.584000000000  |
| H | -5.272025000000 | -1.114631000000 | -1.044192000000 |
| H | -4.125109000000 | -2.155837000000 | -0.191405000000 |
| H | -4.769787000000 | -1.412279000000 | 3.026742000000  |
| H | -3.765866000000 | -2.480177000000 | 2.025123000000  |
| H | -3.076181000000 | -1.702782000000 | 3.457641000000  |
| H | -2.824532000000 | 1.733833000000  | 2.151268000000  |
| H | -4.151857000000 | 1.122475000000  | 3.176286000000  |
| H | -2.474888000000 | 0.647410000000  | 3.499556000000  |
| C | 0.912892000000  | 2.270837000000  | 1.765340000000  |
| C | 2.040685000000  | 3.103746000000  | 1.754303000000  |
| C | 0.741880000000  | 1.383028000000  | 2.841070000000  |

|                            |                 |                 |                 |
|----------------------------|-----------------|-----------------|-----------------|
| C                          | 2.972640000000  | 3.047282000000  | 2.791128000000  |
| H                          | 2.182096000000  | 3.795420000000  | 0.931968000000  |
| C                          | 1.675108000000  | 1.323699000000  | 3.875660000000  |
| H                          | -0.125818000000 | 0.728550000000  | 2.852231000000  |
| C                          | 2.793697000000  | 2.159001000000  | 3.854181000000  |
| H                          | 3.843013000000  | 3.698230000000  | 2.769294000000  |
| H                          | 1.528127000000  | 0.630443000000  | 4.699844000000  |
| H                          | 3.520823000000  | 2.118217000000  | 4.660652000000  |
| C                          | -0.296435000000 | 3.882655000000  | -0.313217000000 |
| C                          | -0.309165000000 | 4.052142000000  | -1.704293000000 |
| C                          | -0.349888000000 | 5.024720000000  | 0.501601000000  |
| C                          | -0.364431000000 | 5.327219000000  | -2.265396000000 |
| H                          | -0.260013000000 | 3.177991000000  | -2.344975000000 |
| C                          | -0.393586000000 | 6.300179000000  | -0.059330000000 |
| H                          | -0.347237000000 | 4.915084000000  | 1.583089000000  |
| C                          | -0.402516000000 | 6.456890000000  | -1.446617000000 |
| H                          | -0.368582000000 | 5.438505000000  | -3.346716000000 |
| H                          | -0.423718000000 | 7.172630000000  | 0.588344000000  |
| H                          | -0.440070000000 | 7.450428000000  | -1.884924000000 |
| C                          | -0.695269000000 | -0.066028000000 | -0.971501000000 |
| C                          | 0.176240000000  | 1.041183000000  | -0.801871000000 |
| C                          | 1.500347000000  | 1.063216000000  | -1.380866000000 |
| O                          | 2.075996000000  | 0.121765000000  | -1.933510000000 |
| O                          | 2.147929000000  | 2.251696000000  | -1.192806000000 |
| C                          | 3.515574000000  | 2.276294000000  | -1.596422000000 |
| H                          | 4.104014000000  | 1.554029000000  | -1.022056000000 |
| H                          | 3.615497000000  | 2.042623000000  | -2.660013000000 |
| H                          | 3.861546000000  | 3.291303000000  | -1.394723000000 |
| C                          | -1.032324000000 | -0.698270000000 | -2.294710000000 |
| C                          | -1.653552000000 | 0.199848000000  | -3.355750000000 |
| C                          | -0.334342000000 | -0.473981000000 | -3.610129000000 |
| H                          | -1.529264000000 | -1.661516000000 | -2.191369000000 |
| H                          | -1.648248000000 | 1.264892000000  | -3.148120000000 |
| H                          | -2.547166000000 | -0.157744000000 | -3.859492000000 |
| H                          | -0.313965000000 | -1.315899000000 | -4.297836000000 |
| H                          | 0.566796000000  | 0.122904000000  | -3.614579000000 |
| <b>TS<sup>S/S77E</sup></b> |                 |                 |                 |
| P                          | 0.322876000000  | -1.965519000000 | 0.001231000000  |
| C                          | -0.837965000000 | -3.213132000000 | -0.741819000000 |
| C                          | -0.297827000000 | -4.600015000000 | -1.107705000000 |
| H                          | -1.669015000000 | -3.320540000000 | -0.030783000000 |
| H                          | -1.255951000000 | -2.721659000000 | -1.625626000000 |
| C                          | -1.354716000000 | -5.462593000000 | -1.808597000000 |
| H                          | 0.046641000000  | -5.117906000000 | -0.204000000000 |

|   |                 |                 |                 |
|---|-----------------|-----------------|-----------------|
| H | 0.577793000000  | -4.503243000000 | -1.762626000000 |
| C | -0.837824000000 | -6.856529000000 | -2.171211000000 |
| H | -1.695796000000 | -4.945585000000 | -2.716436000000 |
| H | -2.236186000000 | -5.551754000000 | -1.158278000000 |
| H | -1.608990000000 | -7.452783000000 | -2.671159000000 |
| H | -0.519731000000 | -7.403960000000 | -1.275748000000 |
| H | 0.025518000000  | -6.793601000000 | -2.844561000000 |
| C | 1.563223000000  | -1.687224000000 | -1.345114000000 |
| C | 2.683474000000  | -0.699556000000 | -0.991163000000 |
| H | 1.989832000000  | -2.655138000000 | -1.639289000000 |
| H | 0.988947000000  | -1.314015000000 | -2.201720000000 |
| C | 3.796748000000  | -0.681411000000 | -2.040119000000 |
| H | 3.106263000000  | -0.937573000000 | -0.009808000000 |
| H | 2.261794000000  | 0.304230000000  | -0.900624000000 |
| C | 4.901189000000  | 0.315879000000  | -1.684526000000 |
| H | 3.370240000000  | -0.421667000000 | -3.017802000000 |
| H | 4.221908000000  | -1.690784000000 | -2.142262000000 |
| H | 5.362062000000  | 0.062761000000  | -0.721346000000 |
| H | 4.494594000000  | 1.329908000000  | -1.608880000000 |
| H | 5.693800000000  | 0.326806000000  | -2.441556000000 |
| C | 1.179895000000  | -2.880723000000 | 1.369699000000  |
| C | 2.403253000000  | -3.729700000000 | 0.999377000000  |
| H | 1.464711000000  | -2.109565000000 | 2.089207000000  |
| H | 0.412737000000  | -3.504822000000 | 1.847620000000  |
| C | 2.993633000000  | -4.442848000000 | 2.221271000000  |
| H | 3.173747000000  | -3.086877000000 | 0.557473000000  |
| H | 2.148305000000  | -4.474458000000 | 0.235978000000  |
| C | 4.237252000000  | -5.266841000000 | 1.879917000000  |
| H | 2.227963000000  | -5.094668000000 | 2.665164000000  |
| H | 3.241112000000  | -3.695247000000 | 2.986575000000  |
| H | 4.642010000000  | -5.768336000000 | 2.765975000000  |
| H | 5.028490000000  | -4.630859000000 | 1.464921000000  |
| H | 4.007908000000  | -6.038282000000 | 1.134454000000  |
| P | -0.442071000000 | 2.440190000000  | -0.319692000000 |
| B | -1.957950000000 | 0.034367000000  | -0.250021000000 |
| O | -1.764115000000 | -0.291684000000 | -1.579244000000 |
| O | -3.279360000000 | 0.193943000000  | 0.069380000000  |
| C | -3.028143000000 | -0.072520000000 | -2.270835000000 |
| C | -4.072165000000 | -0.163563000000 | -1.094475000000 |
| C | -3.177413000000 | -1.144249000000 | -3.345403000000 |
| C | -2.961726000000 | 1.311771000000  | -2.919828000000 |
| C | -5.240165000000 | 0.810181000000  | -1.197002000000 |
| C | -4.587120000000 | -1.584126000000 | -0.842981000000 |
| H | -2.376498000000 | -1.033921000000 | -4.083212000000 |

|   |                 |                 |                 |
|---|-----------------|-----------------|-----------------|
| H | -4.134832000000 | -1.036287000000 | -3.866817000000 |
| H | -3.121810000000 | -2.152852000000 | -2.930443000000 |
| H | -3.874764000000 | 1.527736000000  | -3.483667000000 |
| H | -2.115636000000 | 1.341399000000  | -3.612862000000 |
| H | -2.802524000000 | 2.090671000000  | -2.171572000000 |
| H | -5.833622000000 | 0.613128000000  | -2.096769000000 |
| H | -4.893605000000 | 1.844831000000  | -1.223070000000 |
| H | -5.891632000000 | 0.691962000000  | -0.325825000000 |
| H | -3.760888000000 | -2.295896000000 | -0.757348000000 |
| H | -5.254786000000 | -1.920039000000 | -1.642862000000 |
| H | -5.142228000000 | -1.595223000000 | 0.099498000000  |
| C | 0.945825000000  | 2.711868000000  | -1.509014000000 |
| C | 1.975130000000  | 3.649762000000  | -1.349137000000 |
| C | 0.947522000000  | 1.899295000000  | -2.654479000000 |
| C | 2.977937000000  | 3.772237000000  | -2.311290000000 |
| H | 1.987617000000  | 4.281203000000  | -0.468052000000 |
| C | 1.954875000000  | 2.014940000000  | -3.612291000000 |
| H | 0.155857000000  | 1.165642000000  | -2.781164000000 |
| C | 2.972719000000  | 2.955506000000  | -3.444480000000 |
| H | 3.769912000000  | 4.504255000000  | -2.174105000000 |
| H | 1.940687000000  | 1.378460000000  | -4.493403000000 |
| H | 3.756206000000  | 3.052136000000  | -4.191079000000 |
| C | -0.458667000000 | 3.989788000000  | 0.668875000000  |
| C | -0.440064000000 | 3.990493000000  | 2.069756000000  |
| C | -0.623154000000 | 5.214631000000  | 0.001478000000  |
| C | -0.575589000000 | 5.181240000000  | 2.783493000000  |
| H | -0.304940000000 | 3.053798000000  | 2.598950000000  |
| C | -0.744224000000 | 6.406396000000  | 0.713634000000  |
| H | -0.647313000000 | 5.235173000000  | -1.085417000000 |
| C | -0.723603000000 | 6.394160000000  | 2.109978000000  |
| H | -0.555643000000 | 5.161011000000  | 3.870180000000  |
| H | -0.860281000000 | 7.345138000000  | 0.178048000000  |
| H | -0.823661000000 | 7.321818000000  | 2.666854000000  |
| C | -0.814749000000 | 0.020306000000  | 0.852176000000  |
| C | 0.077406000000  | 1.127105000000  | 0.811676000000  |
| C | 1.366687000000  | 1.087624000000  | 1.454625000000  |
| O | 1.903904000000  | 0.102048000000  | 1.968827000000  |
| O | 2.042063000000  | 2.273472000000  | 1.370198000000  |
| C | 3.394644000000  | 2.246753000000  | 1.821090000000  |
| H | 3.993349000000  | 1.559271000000  | 1.215977000000  |
| H | 3.454030000000  | 1.937111000000  | 2.868290000000  |
| H | 3.761238000000  | 3.267684000000  | 1.703089000000  |
| C | -1.271414000000 | -0.635146000000 | 2.125206000000  |
| C | -0.667613000000 | -0.437047000000 | 3.490179000000  |

|                             |                 |                 |                 |
|-----------------------------|-----------------|-----------------|-----------------|
| C                           | -1.958480000000 | 0.254922000000  | 3.153338000000  |
| H                           | -1.776012000000 | -1.587766000000 | 1.970057000000  |
| H                           | 0.236957000000  | 0.150458000000  | 3.565706000000  |
| H                           | -0.703710000000 | -1.287043000000 | 4.167035000000  |
| H                           | -2.888230000000 | -0.103338000000 | 3.585964000000  |
| H                           | -1.928246000000 | 1.322924000000  | 2.964416000000  |
| <b>TS<sub>5'R/6'R</sub></b> |                 |                 |                 |
| P                           | -1.729587000000 | -1.226054000000 | 0.321190000000  |
| C                           | -3.199729000000 | -0.287771000000 | 0.909740000000  |
| C                           | -3.727027000000 | 0.945870000000  | 0.165105000000  |
| H                           | -2.959708000000 | -0.014006000000 | 1.943818000000  |
| H                           | -3.995144000000 | -1.040287000000 | 0.962367000000  |
| C                           | -5.132373000000 | 1.316369000000  | 0.649137000000  |
| H                           | -3.050595000000 | 1.783762000000  | 0.328585000000  |
| H                           | -3.747025000000 | 0.774738000000  | -0.913136000000 |
| C                           | -5.636797000000 | 2.609013000000  | 0.004728000000  |
| H                           | -5.827871000000 | 0.493188000000  | 0.429625000000  |
| H                           | -5.122717000000 | 1.426054000000  | 1.741981000000  |
| H                           | -6.642593000000 | 2.867632000000  | 0.353676000000  |
| H                           | -4.970965000000 | 3.447801000000  | 0.239413000000  |
| H                           | -5.673822000000 | 2.515040000000  | -1.087424000000 |
| C                           | -1.705869000000 | -2.661681000000 | 1.485762000000  |
| C                           | -2.984662000000 | -3.508952000000 | 1.534384000000  |
| H                           | -1.465052000000 | -2.286231000000 | 2.484252000000  |
| H                           | -0.856061000000 | -3.278651000000 | 1.173994000000  |
| C                           | -2.790658000000 | -4.786911000000 | 2.359724000000  |
| H                           | -3.804311000000 | -2.925824000000 | 1.971031000000  |
| H                           | -3.305780000000 | -3.784305000000 | 0.521180000000  |
| C                           | -4.063413000000 | -5.631853000000 | 2.444621000000  |
| H                           | -1.979046000000 | -5.380648000000 | 1.917442000000  |
| H                           | -2.456483000000 | -4.515839000000 | 3.370386000000  |
| H                           | -4.879652000000 | -5.069899000000 | 2.914169000000  |
| H                           | -4.401815000000 | -5.937006000000 | 1.447037000000  |
| H                           | -3.900521000000 | -6.540144000000 | 3.034592000000  |
| C                           | -2.065435000000 | -2.047058000000 | -1.306882000000 |
| C                           | -3.416873000000 | -1.746379000000 | -1.959480000000 |
| H                           | -1.953375000000 | -3.123886000000 | -1.132955000000 |
| H                           | -1.263296000000 | -1.742071000000 | -1.972116000000 |
| C                           | -3.641360000000 | -2.622645000000 | -3.196735000000 |
| H                           | -4.247371000000 | -1.897412000000 | -1.257093000000 |
| H                           | -3.430102000000 | -0.694594000000 | -2.258210000000 |
| C                           | -4.959905000000 | -2.307722000000 | -3.906448000000 |
| H                           | -2.802731000000 | -2.480873000000 | -3.891690000000 |
| H                           | -3.621598000000 | -3.681710000000 | -2.902981000000 |

|   |                 |                 |                 |
|---|-----------------|-----------------|-----------------|
| H | -5.102168000000 | -2.943098000000 | -4.787407000000 |
| H | -5.815424000000 | -2.465405000000 | -3.238353000000 |
| H | -4.987089000000 | -1.263119000000 | -4.238414000000 |
| P | -0.360694000000 | 2.596288000000  | 1.626078000000  |
| B | 0.831584000000  | -0.596707000000 | -0.691653000000 |
| O | 0.865962000000  | -1.844253000000 | -1.283781000000 |
| O | 1.866359000000  | 0.204140000000  | -1.107423000000 |
| C | 2.046656000000  | -1.909517000000 | -2.132656000000 |
| C | 2.427645000000  | -0.391555000000 | -2.304413000000 |
| C | 3.094490000000  | -2.717180000000 | -1.362617000000 |
| C | 1.668055000000  | -2.626146000000 | -3.423265000000 |
| C | 1.740609000000  | 0.282300000000  | -3.496340000000 |
| C | 3.924665000000  | -0.104550000000 | -2.322616000000 |
| H | 4.002895000000  | -2.865142000000 | -1.954971000000 |
| H | 3.365865000000  | -2.222464000000 | -0.425830000000 |
| H | 2.678023000000  | -3.699942000000 | -1.120388000000 |
| H | 1.380274000000  | -3.658642000000 | -3.200623000000 |
| H | 0.827549000000  | -2.135758000000 | -3.918620000000 |
| H | 2.516022000000  | -2.651268000000 | -4.116575000000 |
| H | 0.657212000000  | 0.151272000000  | -3.448916000000 |
| H | 1.941815000000  | 1.356819000000  | -3.448481000000 |
| H | 2.122345000000  | -0.099155000000 | -4.449020000000 |
| H | 4.413823000000  | -0.451159000000 | -1.409783000000 |
| H | 4.403244000000  | -0.585393000000 | -3.183112000000 |
| H | 4.085026000000  | 0.974732000000  | -2.403623000000 |
| C | -1.232837000000 | 1.997056000000  | 3.158661000000  |
| C | -0.650129000000 | 1.329170000000  | 4.248431000000  |
| C | -2.611958000000 | 2.260675000000  | 3.220980000000  |
| C | -1.421023000000 | 0.900034000000  | 5.329611000000  |
| H | 0.419819000000  | 1.148431000000  | 4.252814000000  |
| C | -3.390590000000 | 1.822593000000  | 4.292939000000  |
| H | -3.075196000000 | 2.823863000000  | 2.415435000000  |
| C | -2.797719000000 | 1.132223000000  | 5.351389000000  |
| H | -0.944042000000 | 0.381649000000  | 6.157900000000  |
| H | -4.456440000000 | 2.036474000000  | 4.309370000000  |
| H | -3.397607000000 | 0.796493000000  | 6.192864000000  |
| C | 1.397759000000  | 2.729211000000  | 2.168858000000  |
| C | 1.754808000000  | 3.275538000000  | 3.412722000000  |
| C | 2.419647000000  | 2.465191000000  | 1.243000000000  |
| C | 3.092545000000  | 3.499602000000  | 3.740408000000  |
| H | 0.982815000000  | 3.527448000000  | 4.134377000000  |
| C | 3.755094000000  | 2.697276000000  | 1.568112000000  |
| H | 2.161113000000  | 2.054516000000  | 0.272800000000  |
| C | 4.101353000000  | 3.205678000000  | 2.821732000000  |



|                             |                 |                 |                 |
|-----------------------------|-----------------|-----------------|-----------------|
| H                           | 3.345619000000  | 3.909057000000  | 4.715431000000  |
| H                           | 4.530145000000  | 2.473348000000  | 0.838533000000  |
| H                           | 5.143293000000  | 3.380287000000  | 3.076645000000  |
| C                           | -0.098618000000 | -0.218228000000 | 0.544761000000  |
| C                           | -0.444070000000 | 1.266519000000  | 0.431718000000  |
| C                           | -0.880524000000 | 1.537502000000  | -0.872164000000 |
| O                           | -1.023734000000 | 0.616243000000  | -1.734198000000 |
| O                           | -1.205485000000 | 2.822415000000  | -1.208492000000 |
| C                           | -1.689543000000 | 3.007744000000  | -2.533752000000 |
| H                           | -0.946633000000 | 2.702720000000  | -3.277554000000 |
| H                           | -2.608256000000 | 2.437162000000  | -2.708766000000 |
| H                           | -1.892231000000 | 4.077022000000  | -2.622400000000 |
| C                           | 0.515130000000  | -0.643968000000 | 1.873159000000  |
| C                           | 1.337112000000  | -1.906293000000 | 2.028909000000  |
| C                           | 2.002651000000  | -0.560288000000 | 2.108728000000  |
| H                           | -0.089350000000 | -0.391133000000 | 2.735539000000  |
| H                           | 1.516731000000  | -2.511312000000 | 1.145875000000  |
| H                           | 1.209504000000  | -2.481330000000 | 2.942498000000  |
| H                           | 2.337882000000  | -0.188240000000 | 3.071989000000  |
| H                           | 2.622095000000  | -0.241954000000 | 1.279375000000  |
| <b>TS<sub>5'S/6'S</sub></b> |                 |                 |                 |
| P                           | 1.253241000000  | 0.115904000000  | -0.031235000000 |
| C                           | 0.963046000000  | -1.222525000000 | -1.255009000000 |
| C                           | 1.520196000000  | -2.615200000000 | -0.930580000000 |
| H                           | 1.326129000000  | -0.878766000000 | -2.227509000000 |
| H                           | -0.128602000000 | -1.275631000000 | -1.324403000000 |
| C                           | 0.833538000000  | -3.681090000000 | -1.792682000000 |
| H                           | 2.606588000000  | -2.641897000000 | -1.095510000000 |
| H                           | 1.334507000000  | -2.838136000000 | 0.122416000000  |
| C                           | 1.339528000000  | -5.092879000000 | -1.493611000000 |
| H                           | -0.248413000000 | -3.630080000000 | -1.618195000000 |
| H                           | 0.975161000000  | -3.450843000000 | -2.857532000000 |
| H                           | 1.173232000000  | -5.353127000000 | -0.440994000000 |
| H                           | 0.822908000000  | -5.838349000000 | -2.108254000000 |
| H                           | 2.415151000000  | -5.183174000000 | -1.690342000000 |
| C                           | 2.453660000000  | -0.401137000000 | 1.265056000000  |
| C                           | 3.201452000000  | 0.745071000000  | 1.959949000000  |
| H                           | 3.161438000000  | -1.077833000000 | 0.769719000000  |
| H                           | 1.874408000000  | -0.980411000000 | 1.980782000000  |
| C                           | 3.926802000000  | 0.246148000000  | 3.213581000000  |
| H                           | 3.928791000000  | 1.206273000000  | 1.280306000000  |
| H                           | 2.494989000000  | 1.525980000000  | 2.256651000000  |
| C                           | 4.640049000000  | 1.369915000000  | 3.967142000000  |
| H                           | 3.192001000000  | -0.233208000000 | 3.871669000000  |

|   |                 |                 |                 |
|---|-----------------|-----------------|-----------------|
| H | 4.648877000000  | -0.533763000000 | 2.934298000000  |
| H | 3.926453000000  | 2.138189000000  | 4.289191000000  |
| H | 5.150025000000  | 0.992629000000  | 4.860310000000  |
| H | 5.391043000000  | 1.859377000000  | 3.335034000000  |
| C | 2.227708000000  | 1.420403000000  | -0.924759000000 |
| C | 1.876074000000  | 1.754005000000  | -2.379880000000 |
| H | 3.270251000000  | 1.080111000000  | -0.886244000000 |
| H | 2.176511000000  | 2.324758000000  | -0.311325000000 |
| C | 2.681907000000  | 2.953865000000  | -2.891839000000 |
| H | 2.082556000000  | 0.888728000000  | -3.021488000000 |
| H | 0.810141000000  | 1.970788000000  | -2.485929000000 |
| C | 2.373582000000  | 3.287687000000  | -4.352800000000 |
| H | 2.466146000000  | 3.825568000000  | -2.259015000000 |
| H | 3.755244000000  | 2.748453000000  | -2.775698000000 |
| H | 2.610999000000  | 2.442401000000  | -5.009811000000 |
| H | 1.311082000000  | 3.523232000000  | -4.486839000000 |
| H | 2.953650000000  | 4.151061000000  | -4.695906000000 |
| P | -2.941328000000 | -0.015413000000 | -0.709072000000 |
| B | -0.522872000000 | 1.052012000000  | 2.114498000000  |
| O | 0.404020000000  | 0.665244000000  | 3.051655000000  |
| O | -1.611982000000 | 1.667740000000  | 2.698188000000  |
| C | -0.249691000000 | 0.718789000000  | 4.350959000000  |
| C | -1.330809000000 | 1.826112000000  | 4.113151000000  |
| C | -0.850789000000 | -0.668093000000 | 4.597964000000  |
| C | 0.793014000000  | 1.049923000000  | 5.409922000000  |
| C | -0.791165000000 | 3.246647000000  | 4.303232000000  |
| C | -2.629995000000 | 1.638812000000  | 4.886422000000  |
| H | -0.062312000000 | -1.417710000000 | 4.496689000000  |
| H | -1.284925000000 | -0.738679000000 | 5.600637000000  |
| H | -1.621725000000 | -0.904861000000 | 3.860196000000  |
| H | 1.355914000000  | 1.950280000000  | 5.153460000000  |
| H | 0.316761000000  | 1.200706000000  | 6.384948000000  |
| H | 1.500927000000  | 0.221097000000  | 5.504881000000  |
| H | -0.613992000000 | 3.473340000000  | 5.359328000000  |
| H | 0.146171000000  | 3.387446000000  | 3.755699000000  |
| H | -1.523040000000 | 3.960365000000  | 3.914066000000  |
| H | -3.096669000000 | 0.678974000000  | 4.657589000000  |
| H | -2.448656000000 | 1.693336000000  | 5.965685000000  |
| H | -3.335499000000 | 2.430623000000  | 4.617176000000  |
| C | -2.878794000000 | -1.475062000000 | -1.858025000000 |
| C | -2.165124000000 | -1.290821000000 | -3.053574000000 |
| C | -3.429601000000 | -2.741123000000 | -1.606396000000 |
| C | -1.972650000000 | -2.339442000000 | -3.953191000000 |
| H | -1.754236000000 | -0.307893000000 | -3.276552000000 |

|   |                 |                 |                 |
|---|-----------------|-----------------|-----------------|
| C | -3.247654000000 | -3.789818000000 | -2.508536000000 |
| H | -3.995501000000 | -2.901021000000 | -0.697053000000 |
| C | -2.512335000000 | -3.597094000000 | -3.680527000000 |
| H | -1.412120000000 | -2.172683000000 | -4.869745000000 |
| H | -3.678503000000 | -4.764769000000 | -2.293392000000 |
| H | -2.369672000000 | -4.417619000000 | -4.378689000000 |
| C | -4.420665000000 | -0.374936000000 | 0.329865000000  |
| C | -4.384861000000 | -0.161860000000 | 1.715031000000  |
| C | -5.643449000000 | -0.729709000000 | -0.260591000000 |
| C | -5.533816000000 | -0.314814000000 | 2.489089000000  |
| H | -3.447609000000 | 0.131284000000  | 2.174361000000  |
| C | -6.790230000000 | -0.895900000000 | 0.515929000000  |
| H | -5.697192000000 | -0.888150000000 | -1.334706000000 |
| C | -6.740808000000 | -0.689924000000 | 1.895862000000  |
| H | -5.485873000000 | -0.145852000000 | 3.562762000000  |
| H | -7.724985000000 | -1.184230000000 | 0.041280000000  |
| H | -7.634802000000 | -0.816238000000 | 2.500852000000  |
| C | -0.459562000000 | 0.799202000000  | 0.549397000000  |
| C | -1.526952000000 | -0.287319000000 | 0.371278000000  |
| C | -1.221696000000 | -1.508443000000 | 1.000732000000  |
| O | -0.104104000000 | -1.785744000000 | 1.502932000000  |
| O | -2.222160000000 | -2.444967000000 | 1.027692000000  |
| C | -1.838399000000 | -3.745176000000 | 1.460452000000  |
| H | -2.758047000000 | -4.333600000000 | 1.469557000000  |
| H | -1.117748000000 | -4.196779000000 | 0.769175000000  |
| H | -1.394499000000 | -3.717367000000 | 2.459359000000  |
| C | -0.739572000000 | 2.037957000000  | -0.296805000000 |
| C | -1.687348000000 | 3.133641000000  | 0.115961000000  |
| C | -0.205627000000 | 3.406287000000  | 0.058481000000  |
| H | -0.802689000000 | 1.815922000000  | -1.358041000000 |
| H | -2.158790000000 | 3.064749000000  | 1.086735000000  |
| H | -2.315592000000 | 3.537606000000  | -0.671711000000 |
| H | 0.187003000000  | 4.037321000000  | -0.735195000000 |
| H | 0.318967000000  | 3.513160000000  | 1.006445000000  |

**10. DFT-optimized cartesian coordinates of all species involved in the phosphine-catalyzed hydroboration reaction.**

**PMe<sub>3</sub>**

|   |             |             |             |
|---|-------------|-------------|-------------|
| P | 0.00000000  | 0.00009200  | 0.60049900  |
| C | 0.00000000  | 1.63569000  | -0.28015800 |
| H | -0.88602300 | 2.21019100  | 0.01003100  |
| H | 0.88602300  | 2.21019100  | 0.01003100  |
| H | 0.00000000  | 1.50592600  | -1.36938500 |
| C | -1.41628900 | -0.81795000 | -0.28046000 |
| H | -1.47122500 | -1.87234100 | 0.01020200  |
| H | -2.35698200 | -0.33742000 | 0.00842700  |
| H | -1.30231100 | -0.75333600 | -1.36951400 |
| C | 1.41628900  | -0.81795000 | -0.28046000 |
| H | 2.35698200  | -0.33742000 | 0.00842700  |
| H | 1.47122500  | -1.87234100 | 0.01020200  |
| H | 1.30231100  | -0.75333600 | -1.36951400 |

**I**

|   |             |             |             |
|---|-------------|-------------|-------------|
| C | -6.04097900 | -3.24889500 | -3.22291900 |
| C | -4.83519500 | -3.34241600 | -3.13172700 |
| C | -3.42930100 | -3.45324700 | -3.02699700 |
| C | -2.78502400 | -4.64993300 | -3.38994500 |
| C | -2.66836600 | -2.36638100 | -2.55934700 |
| C | -1.40522000 | -4.75062500 | -3.28503300 |
| H | -3.37681400 | -5.48561200 | -3.75014500 |
| C | -1.28935400 | -2.48155100 | -2.45872700 |
| H | -3.17047300 | -1.44526200 | -2.28045300 |
| C | -0.65592300 | -3.67007800 | -2.82053300 |
| H | -0.91061800 | -5.67555800 | -3.56648000 |
| H | -0.70466500 | -1.64101900 | -2.09682000 |
| H | 0.42395400  | -3.75452500 | -2.74003600 |
| C | -7.45455900 | -3.05071700 | -3.30972300 |
| O | -8.01419100 | -2.00629400 | -3.02664100 |
| O | -8.08062600 | -4.16004500 | -3.74178500 |
| C | -9.52256000 | -4.04858900 | -3.86193400 |
| H | -9.77963800 | -3.27076700 | -4.58554800 |
| H | -9.85510100 | -5.02567900 | -4.21018800 |
| H | -9.96301900 | -3.81195000 | -2.89008900 |

**HBpin**

|   |             |             |             |
|---|-------------|-------------|-------------|
| O | -1.07307900 | 1.20721300  | -0.40789700 |
| O | 1.07294900  | 1.20734000  | 0.40779100  |
| C | -0.78212900 | -0.19268200 | -0.05055000 |
| C | 0.78213200  | -0.19260900 | 0.05054700  |
| C | -1.34927500 | -1.10011800 | -1.12655000 |

|   |             |             |             |
|---|-------------|-------------|-------------|
| H | -1.06481400 | -2.13883200 | -0.92748500 |
| H | -2.44175100 | -1.03834000 | -1.11942700 |
| H | -0.99147100 | -0.82252700 | -2.12015100 |
| C | -1.47328200 | -0.44855500 | 1.28460300  |
| H | -2.54307900 | -0.24841400 | 1.17294500  |
| H | -1.34823100 | -1.48996100 | 1.59584500  |
| H | -1.07917900 | 0.20392000  | 2.07008300  |
| C | 1.34934900  | -1.09990900 | 1.12662400  |
| H | 1.06499100  | -2.13866500 | 0.92763500  |
| H | 2.44181900  | -1.03802700 | 1.11951000  |
| H | 0.99150600  | -0.82227400 | 2.12019900  |
| C | 1.47332500  | -0.44851300 | -1.28457900 |
| H | 2.54310200  | -0.24826400 | -1.17292200 |
| H | 1.34837600  | -1.48995200 | -1.59574900 |
| H | 1.07917200  | 0.20386900  | -2.07011100 |
| B | -0.00008000 | 1.94923400  | -0.00012600 |
| H | -0.00016000 | 3.14058100  | -0.00011500 |

**S13**

|   |             |             |             |
|---|-------------|-------------|-------------|
| C | -0.26852800 | -1.55343400 | -0.12308000 |
| C | 0.40711700  | -0.39560600 | -0.10333300 |
| C | -0.14723700 | 0.98614500  | -0.11206700 |
| C | -1.09702400 | 1.35056900  | -1.07658000 |
| C | 0.22051800  | 1.93107200  | 0.85510600  |
| C | -1.66477000 | 2.62069900  | -1.06801800 |
| H | -1.38385000 | 0.62705400  | -1.83393900 |
| C | -0.34789500 | 3.20172800  | 0.86220500  |
| H | 0.93729200  | 1.66237000  | 1.62799200  |
| C | -1.29205000 | 3.55214400  | -0.10030000 |
| H | -2.39742500 | 2.88647100  | -1.82542600 |
| H | -0.05903200 | 3.91675200  | 1.62792900  |
| H | -1.73536100 | 4.54394900  | -0.09570400 |
| C | -1.69041600 | -1.65521400 | -0.18800500 |
| O | -2.34987200 | -1.88034500 | -1.20664800 |
| O | -2.27826500 | -1.61074000 | 1.05346700  |
| C | -3.69106100 | -1.89719800 | 1.08126600  |
| H | -3.89313000 | -2.89904600 | 0.68954000  |
| H | -3.97954400 | -1.83937800 | 2.13203400  |
| H | -4.25132200 | -1.16146100 | 0.49635500  |
| P | 2.20339400  | -0.61321400 | -0.02942200 |
| C | 2.76112200  | -1.07808700 | 1.63365100  |
| H | 2.53331600  | -0.27196700 | 2.33707600  |
| H | 2.22718800  | -1.98414600 | 1.93584700  |
| H | 3.83925100  | -1.26744500 | 1.62540600  |
| C | 3.11953800  | 0.87220400  | -0.52974500 |

|            |             |             |             |
|------------|-------------|-------------|-------------|
| H          | 2.74470600  | 1.21582100  | -1.49894000 |
| H          | 2.99173300  | 1.66880500  | 0.20725000  |
| H          | 4.18207300  | 0.62406800  | -0.61552500 |
| C          | 2.69651800  | -1.94500900 | -1.15023600 |
| H          | 2.12648200  | -2.84237300 | -0.89768300 |
| H          | 2.46867900  | -1.64965200 | -2.17865800 |
| H          | 3.76977700  | -2.13133600 | -1.04320400 |
| <b>S14</b> |             |             |             |
| C          | 1.26167400  | -0.41285500 | 1.51102400  |
| C          | 1.97701000  | -0.24914000 | 0.38174300  |
| C          | 2.26416400  | 1.09103300  | -0.20987300 |
| C          | 1.64957100  | 1.49306100  | -1.40050900 |
| C          | 3.13300000  | 1.97462100  | 0.43897800  |
| C          | 1.89289200  | 2.75791400  | -1.92709400 |
| H          | 0.96045200  | 0.81855700  | -1.90324800 |
| C          | 3.37392300  | 3.24023900  | -0.08855200 |
| H          | 3.61743100  | 1.66279300  | 1.36060200  |
| C          | 2.75567000  | 3.63491200  | -1.27270400 |
| H          | 1.39981700  | 3.06288400  | -2.84602200 |
| H          | 4.04867000  | 3.91847400  | 0.42656000  |
| H          | 2.94365500  | 4.62288800  | -1.68348300 |
| C          | 0.70002400  | 0.80735900  | 2.14688500  |
| O          | -0.26372000 | 1.42267400  | 1.72918700  |
| O          | 1.34009200  | 1.10526900  | 3.29260700  |
| C          | 0.79683000  | 2.22131900  | 4.04034100  |
| H          | -0.23739900 | 2.01410400  | 4.32764200  |
| H          | 1.42951900  | 2.31274600  | 4.92298300  |
| H          | 0.83784800  | 3.13514100  | 3.44131900  |
| P          | 2.72937200  | -1.64912200 | -0.49648300 |
| C          | 3.44820800  | -2.89571600 | 0.60028400  |
| H          | 4.11047700  | -2.40296200 | 1.31758000  |
| H          | 2.65866600  | -3.43295000 | 1.12701900  |
| H          | 4.02597100  | -3.58629400 | -0.02349200 |
| C          | 4.11832800  | -0.98488300 | -1.45659800 |
| H          | 3.76022600  | -0.28347100 | -2.21461400 |
| H          | 4.81311900  | -0.46734600 | -0.78830400 |
| H          | 4.62975100  | -1.82120700 | -1.94288000 |
| C          | 1.63123600  | -2.47955000 | -1.67530800 |
| H          | 0.86595500  | -3.01550300 | -1.11003800 |
| H          | 1.16634600  | -1.73884400 | -2.33248100 |
| H          | 2.22659900  | -3.17824800 | -2.27295700 |
| O          | -0.37284600 | -1.53658500 | 3.10235500  |
| O          | 0.42791500  | -2.86854300 | 1.32769700  |
| C          | -1.32226900 | -2.57497200 | 2.84586300  |

|   |             |             |             |
|---|-------------|-------------|-------------|
| C | -1.00656500 | -2.95434800 | 1.36143900  |
| C | -2.72741500 | -2.03262500 | 3.07567300  |
| H | -3.48331300 | -2.76780600 | 2.77650500  |
| H | -2.86804900 | -1.81546400 | 4.14025100  |
| H | -2.89204700 | -1.10933700 | 2.51428900  |
| C | -1.05880300 | -3.74308300 | 3.80397600  |
| H | -1.09396000 | -3.36717700 | 4.83212000  |
| H | -1.81171500 | -4.53249200 | 3.70214000  |
| H | -0.06868500 | -4.17607100 | 3.62925200  |
| C | -1.42285500 | -4.36352800 | 0.95989900  |
| H | -2.50282800 | -4.49886500 | 1.08792600  |
| H | -1.18336300 | -4.53324000 | -0.09613200 |
| H | -0.90120000 | -5.11721600 | 1.55509200  |
| C | -1.60686300 | -1.94071800 | 0.37964500  |
| H | -1.20997600 | -2.13156400 | -0.62275600 |
| H | -2.69769900 | -2.02792300 | 0.33215500  |
| H | -1.34854700 | -0.91580600 | 0.66361600  |
| B | 0.82767300  | -1.81105400 | 2.28469100  |
| H | 1.81321600  | -2.16200600 | 2.95403000  |

**S15**

|   |            |             |             |
|---|------------|-------------|-------------|
| C | 1.86860200 | -0.69450300 | 1.36783000  |
| C | 1.93704900 | -0.04975500 | -0.00316600 |
| C | 2.61025300 | 1.22756700  | -0.13554800 |
| C | 2.30765800 | 2.16313800  | -1.15726600 |
| C | 3.61448400 | 1.62830800  | 0.78480100  |
| C | 2.99067100 | 3.36543100  | -1.28487600 |
| H | 1.48808500 | 1.95944200  | -1.84192800 |
| C | 4.27908500 | 2.84171400  | 0.66490900  |
| H | 3.89597400 | 0.96053900  | 1.59459900  |
| C | 3.98796200 | 3.72443300  | -0.37665800 |
| H | 2.71646600 | 4.04727600  | -2.08701500 |
| H | 5.04689900 | 3.09666800  | 1.39236400  |
| H | 4.51044900 | 4.67202500  | -0.46754300 |
| C | 1.51994900 | 0.32997600  | 2.44694300  |
| O | 0.69056900 | 1.21161600  | 2.35407800  |
| O | 2.22583400 | 0.10204600  | 3.57710600  |
| C | 1.91733700 | 0.97362900  | 4.68995800  |
| H | 0.86613500 | 0.87099200  | 4.97353300  |
| H | 2.56716800 | 0.64771900  | 5.50220500  |
| H | 2.12608800 | 2.01361000  | 4.42454100  |
| P | 1.40424500 | -0.87511400 | -1.41926800 |
| C | 1.36230900 | -2.68607500 | -1.18252000 |
| H | 0.41206400 | -2.98823000 | -0.73944100 |
| H | 1.45223200 | -3.15742900 | -2.16622500 |

|   |             |             |             |
|---|-------------|-------------|-------------|
| H | 2.19402000  | -3.01345300 | -0.55159500 |
| C | 2.54507400  | -0.64333000 | -2.83014400 |
| H | 2.67324900  | 0.41243600  | -3.07306900 |
| H | 3.51772500  | -1.06987400 | -2.56741000 |
| H | 2.13704000  | -1.16633900 | -3.70079500 |
| C | -0.25530200 | -0.52215600 | -2.13770100 |
| H | -0.44924700 | -1.18663800 | -2.98754000 |
| H | -1.01066500 | -0.68282000 | -1.36306700 |
| H | -0.30326600 | 0.51737400  | -2.47497500 |
| O | -0.55335700 | -1.65552500 | 1.14604700  |
| O | 0.85751000  | -2.73140900 | 2.60066900  |
| C | -1.42107500 | -2.50438300 | 1.97804000  |
| C | -0.39746300 | -3.49684800 | 2.64332300  |
| C | -2.45486300 | -3.16164300 | 1.08330100  |
| H | -3.07117600 | -3.85560600 | 1.66436200  |
| H | -3.11042000 | -2.39454200 | 0.65985800  |
| H | -1.98689000 | -3.71095900 | 0.26295300  |
| C | -2.08982600 | -1.56766300 | 2.97785500  |
| H | -2.64757400 | -0.80413400 | 2.42735100  |
| H | -2.78853600 | -2.11108800 | 3.62080200  |
| H | -1.34935400 | -1.06345000 | 3.60752600  |
| C | -0.70284500 | -3.83923800 | 4.09128300  |
| H | -1.67544400 | -4.33754700 | 4.16130600  |
| H | 0.05999600  | -4.52519200 | 4.47191400  |
| H | -0.71690800 | -2.94960800 | 4.72437900  |
| C | -0.16301200 | -4.77320100 | 1.84375200  |
| H | 0.67784800  | -5.31520300 | 2.28675600  |
| H | -1.04413000 | -5.42119800 | 1.87436200  |
| H | 0.07801200  | -4.56170600 | 0.79876000  |
| B | 0.71029500  | -1.74180500 | 1.66569700  |
| H | 2.81563800  | -1.16075000 | 1.68586900  |

**S16**

|   |             |             |             |
|---|-------------|-------------|-------------|
| C | 2.19099500  | -0.75983500 | 1.87698700  |
| C | 1.76651800  | -0.59912800 | 0.39694000  |
| C | 1.55258700  | 0.75390000  | -0.21225800 |
| C | 2.50429400  | 1.77275700  | -0.08058200 |
| C | 0.40886100  | 1.00108000  | -0.97952500 |
| C | 2.31902300  | 3.00245500  | -0.70075900 |
| H | 3.38989500  | 1.59556300  | 0.52419200  |
| C | 0.22340500  | 2.23170500  | -1.60529900 |
| H | -0.34369000 | 0.22194700  | -1.06871800 |
| C | 1.17754500  | 3.23676200  | -1.46798800 |
| H | 3.06580900  | 3.78363400  | -0.58497900 |
| H | -0.67309900 | 2.40792000  | -2.19387300 |



|   |             |             |             |
|---|-------------|-------------|-------------|
| H | 1.03184100  | 4.19922300  | -1.95082700 |
| C | 2.16889500  | 0.31614700  | 2.82918000  |
| O | 1.60761900  | 1.40392900  | 2.75120700  |
| O | 2.82955500  | -0.06089200 | 3.98512200  |
| C | 2.72535000  | 0.86631400  | 5.07847300  |
| H | 1.68039200  | 1.01304900  | 5.37089600  |
| H | 3.28329700  | 0.41495100  | 5.90081600  |
| H | 3.16189400  | 1.83533600  | 4.81619800  |
| P | 2.65525000  | -1.64223400 | -0.74910300 |
| C | 3.18946400  | -3.21727500 | -0.03056500 |
| H | 2.33357900  | -3.72323000 | 0.42140600  |
| H | 3.61090300  | -3.82594300 | -0.83703300 |
| H | 3.96099300  | -3.04119800 | 0.72410500  |
| C | 4.15545400  | -0.85156500 | -1.39972300 |
| H | 3.88957400  | 0.05680800  | -1.94699200 |
| H | 4.81736400  | -0.59202200 | -0.56756500 |
| H | 4.66782900  | -1.54951700 | -2.06957300 |
| C | 1.58926400  | -2.02093300 | -2.16178900 |
| H | 2.13576300  | -2.65131000 | -2.86988000 |
| H | 0.70024400  | -2.54745100 | -1.80195000 |
| H | 1.28921600  | -1.09185500 | -2.65454100 |
| O | -0.52989400 | -0.62383700 | 1.65519200  |
| O | 0.44509600  | -2.72989900 | 1.38027600  |
| C | -1.38473600 | -1.59273300 | 2.29916200  |
| C | -0.97561300 | -2.91578500 | 1.57278500  |
| C | -2.83458500 | -1.18151400 | 2.09877000  |
| H | -3.50951600 | -1.95706000 | 2.47763900  |
| H | -3.03528900 | -0.25645700 | 2.64938400  |
| H | -3.05586500 | -1.00753000 | 1.04287200  |
| C | -1.04309400 | -1.61861300 | 3.79111900  |
| H | -1.15609200 | -0.60663200 | 4.19365000  |
| H | -1.70775900 | -2.28815800 | 4.34688300  |
| H | -0.00752600 | -1.93800900 | 3.94949200  |
| C | -1.20587100 | -4.18263300 | 2.38236700  |
| H | -2.26746200 | -4.28906100 | 2.63220900  |
| H | -0.90609500 | -5.05738100 | 1.79523900  |
| H | -0.62619500 | -4.17476700 | 3.30857500  |
| C | -1.62812000 | -3.04734500 | 0.19479300  |
| H | -1.14737900 | -3.87023200 | -0.34489000 |
| H | -2.69820800 | -3.26648900 | 0.27215800  |
| H | -1.49844300 | -2.12749700 | -0.38511600 |
| B | 0.67940600  | -1.31012300 | 1.33926900  |
| H | 2.89997500  | -1.54981800 | 2.10745900  |

S17

|   |             |             |             |
|---|-------------|-------------|-------------|
| C | 2.05444700  | -0.81845900 | 1.39858000  |
| C | 1.62093300  | -0.60700400 | -0.04531500 |
| C | 1.67755400  | 0.81109100  | -0.59450100 |
| C | 2.60949100  | 1.73340300  | -0.10956300 |
| C | 0.82213100  | 1.20276200  | -1.62910300 |
| C | 2.69612400  | 3.00714900  | -0.65884600 |
| H | 3.25677300  | 1.43896000  | 0.71148700  |
| C | 0.90501600  | 2.48014700  | -2.17795400 |
| H | 0.07495200  | 0.50592900  | -2.00252700 |
| C | 1.84489600  | 3.38753400  | -1.69619500 |
| H | 3.42484000  | 3.71270900  | -0.26834700 |
| H | 0.22808900  | 2.76701600  | -2.97815100 |
| H | 1.90732000  | 4.38712000  | -2.11756200 |
| C | 1.65772200  | 0.02514400  | 2.43436400  |
| O | 1.04390300  | 1.10762200  | 2.39274800  |
| O | 2.06530500  | -0.48500500 | 3.68983800  |
| C | 1.69194100  | 0.31372600  | 4.81304500  |
| H | 0.60342800  | 0.42380700  | 4.88902800  |
| H | 2.06775500  | -0.21547400 | 5.69267400  |
| H | 2.13933100  | 1.31380600  | 4.76843400  |
| P | 2.73224000  | -1.59048500 | -1.12334700 |
| C | 3.03177900  | -3.26717500 | -0.50074000 |
| H | 2.08206200  | -3.76313400 | -0.28989200 |
| H | 3.57913000  | -3.81627500 | -1.27378100 |
| H | 3.64012400  | -3.22330700 | 0.40614700  |
| C | 4.35401800  | -0.79917700 | -1.27063800 |
| H | 4.26641100  | 0.13613400  | -1.82890600 |
| H | 4.74553600  | -0.59323300 | -0.26980600 |
| H | 5.02851800  | -1.48335500 | -1.79488000 |
| C | 2.03271700  | -1.75299600 | -2.78489100 |
| H | 2.72130400  | -2.34078700 | -3.39969200 |
| H | 1.06702800  | -2.26447200 | -2.72666900 |
| H | 1.89967900  | -0.76392800 | -3.23089000 |
| O | -0.94932400 | -0.53939000 | 0.34328100  |
| O | -0.03486100 | -2.62024600 | -0.02290200 |
| C | -1.94704900 | -1.51378700 | 0.79901500  |
| C | -1.48537600 | -2.81661300 | 0.06469400  |
| C | -3.32765200 | -1.01990700 | 0.40977500  |
| H | -4.08052800 | -1.77660300 | 0.65536300  |
| H | -3.56283600 | -0.10981900 | 0.97020000  |
| H | -3.38938500 | -0.79550800 | -0.65748100 |
| C | -1.81047500 | -1.60423100 | 2.31601400  |
| H | -1.96511300 | -0.60861000 | 2.74255000  |
| H | -2.55517000 | -2.28384600 | 2.74144500  |

|            |             |             |             |
|------------|-------------|-------------|-------------|
| H          | -0.80991400 | -1.94734000 | 2.60075200  |
| C          | -1.76061600 | -4.10330600 | 0.82161400  |
| H          | -2.83720300 | -4.22022500 | 0.98551400  |
| H          | -1.40991600 | -4.95818600 | 0.23481900  |
| H          | -1.25460200 | -4.11385700 | 1.78932600  |
| C          | -2.00234500 | -2.91225900 | -1.36714900 |
| H          | -1.48546300 | -3.73148400 | -1.87671500 |
| H          | -3.07674900 | -3.11915100 | -1.38578200 |
| H          | -1.81296200 | -1.98525600 | -1.91825600 |
| B          | 0.19317600  | -1.25692700 | 0.07499700  |
| H          | 2.48049800  | -1.77602200 | 1.67169800  |
| <b>S18</b> |             |             |             |
| O          | -0.68812800 | 1.28818400  | -1.03018100 |
| O          | -1.20069900 | 0.59965500  | 1.12699000  |
| C          | -1.15221100 | 2.45126800  | -0.31720000 |
| C          | -1.91791900 | 1.83270300  | 0.90706700  |
| C          | -2.02904000 | 3.28431600  | -1.24708200 |
| H          | -2.47850700 | 4.12466600  | -0.70571600 |
| H          | -1.41596300 | 3.69191500  | -2.05808600 |
| H          | -2.82711100 | 2.68324300  | -1.68908400 |
| C          | 0.05624800  | 3.28755500  | 0.10556000  |
| H          | 0.67004100  | 3.49047300  | -0.77834100 |
| H          | -0.25284000 | 4.24526900  | 0.53874200  |
| H          | 0.67416700  | 2.75740400  | 0.83312100  |
| C          | -1.86078900 | 2.66660200  | 2.17984200  |
| H          | -2.30193700 | 3.65530500  | 2.01209800  |
| H          | -2.43291600 | 2.16977500  | 2.97097800  |
| H          | -0.83303600 | 2.79685500  | 2.52783400  |
| C          | -3.37898000 | 1.50329200  | 0.58361200  |
| H          | -3.79151400 | 0.90183600  | 1.40081700  |
| H          | -3.98104100 | 2.41320100  | 0.48918200  |
| H          | -3.46307200 | 0.92781800  | -0.34178700 |
| B          | -0.75019200 | 0.13502100  | -0.16477100 |
| H          | 0.88280700  | -2.75564000 | -1.42112200 |
| C          | 0.24054200  | -1.96501000 | -1.05371900 |
| C          | 0.64385700  | -0.84400900 | -0.13436000 |
| C          | 1.92052800  | -0.11966700 | -0.49949600 |
| C          | 2.50559300  | 0.82507300  | 0.35348200  |
| C          | 2.53107200  | -0.33988900 | -1.74010000 |
| C          | 3.65724000  | 1.51463900  | -0.01090300 |
| H          | 2.03953500  | 1.05556800  | 1.30451400  |
| C          | 3.68020600  | 0.35453400  | -2.11146500 |
| H          | 2.08783000  | -1.05441900 | -2.42663300 |
| C          | 4.25567100  | 1.28161000  | -1.24719700 |

|   |             |             |             |
|---|-------------|-------------|-------------|
| H | 4.08183600  | 2.24627100  | 0.67182300  |
| H | 4.12795300  | 0.16522200  | -3.08379300 |
| H | 5.15479900  | 1.81976900  | -1.53420000 |
| C | -1.09081900 | -1.89160400 | -1.30262400 |
| O | -1.77085400 | -0.88464000 | -0.79285000 |
| O | -1.76086600 | -2.81587100 | -2.02279300 |
| C | -3.13324900 | -2.51684600 | -2.34720800 |
| H | -3.20334000 | -1.59869200 | -2.93906300 |
| H | -3.48102500 | -3.36705600 | -2.93560500 |
| H | -3.73801000 | -2.41538300 | -1.44143600 |
| P | 0.79114600  | -1.66197700 | 1.51305500  |
| C | 1.16114100  | -0.64156200 | 2.98094800  |
| H | 2.22327500  | -0.38781000 | 3.01575800  |
| H | 0.55146800  | 0.26482800  | 2.95468200  |
| H | 0.90652600  | -1.23003800 | 3.86876500  |
| C | 2.10637400  | -2.91413400 | 1.44964800  |
| H | 1.87851300  | -3.65528500 | 0.67925800  |
| H | 3.05784700  | -2.42581400 | 1.21618300  |
| H | 2.18240900  | -3.40980600 | 2.42238700  |
| C | -0.75201200 | -2.52398400 | 1.92138200  |
| H | -1.54426400 | -1.78664900 | 2.07387300  |
| H | -1.02564700 | -3.20293000 | 1.11083300  |
| H | -0.59027000 | -3.09315800 | 2.84216000  |

**S19Z**

|   |            |             |             |
|---|------------|-------------|-------------|
| O | 0.04680300 | -1.67298000 | -0.25215800 |
| O | 1.35486600 | 0.07012200  | 0.47157800  |
| C | 1.29295000 | -2.28140300 | 0.24131200  |
| C | 2.27301800 | -1.05893400 | 0.25599400  |
| C | 1.69373100 | -3.40728200 | -0.69386900 |
| H | 2.66841700 | -3.80817600 | -0.39648400 |
| H | 0.95816000 | -4.21482000 | -0.63137700 |
| H | 1.75386700 | -3.06998300 | -1.73078600 |
| C | 0.98555700 | -2.82272300 | 1.63311000  |
| H | 0.15886600 | -3.53569400 | 1.56065600  |
| H | 1.85366800 | -3.34244200 | 2.04945400  |
| H | 0.69302000 | -2.02047300 | 2.31808800  |
| C | 3.29624200 | -1.07733000 | 1.37604500  |
| H | 3.93408200 | -1.96309300 | 1.28663200  |
| H | 3.93301100 | -0.19017000 | 1.30567500  |
| H | 2.81892400 | -1.08610600 | 2.35817500  |
| C | 2.94951600 | -0.81606400 | -1.08874800 |
| H | 3.45546000 | 0.15356400  | -1.06081400 |
| H | 3.69608400 | -1.58856700 | -1.29604100 |
| H | 2.22023100 | -0.80351000 | -1.90509100 |

|   |             |             |             |
|---|-------------|-------------|-------------|
| B | 0.12126600  | -0.33588800 | 0.03237400  |
| H | -0.00282300 | 2.17793700  | 0.82168000  |
| C | -0.94292300 | 1.89766100  | 0.35170500  |
| C | -1.09854200 | 0.63950700  | -0.10849600 |
| C | -2.36383300 | 0.10387700  | -0.65787500 |
| C | -2.37764300 | -0.52766800 | -1.90719500 |
| C | -3.55063100 | 0.16469500  | 0.08215700  |
| C | -3.56104300 | -1.04688700 | -2.42256500 |
| H | -1.45915700 | -0.59585400 | -2.48458200 |
| C | -4.72730500 | -0.37334400 | -0.42465200 |
| H | -3.54293600 | 0.63157900  | 1.06376200  |
| C | -4.73910200 | -0.97388600 | -1.68270200 |
| H | -3.56052800 | -1.51726500 | -3.40199400 |
| H | -5.63934800 | -0.32400200 | 0.16389600  |
| H | -5.66026100 | -1.39062000 | -2.08030200 |
| C | -1.93089400 | 2.99353000  | 0.24885500  |
| O | -2.84146800 | 3.08586600  | -0.55184500 |
| O | -1.64903000 | 3.94817900  | 1.16482800  |
| C | -2.52515700 | 5.09894200  | 1.15658400  |
| H | -3.55705700 | 4.79160700  | 1.34739300  |
| H | -2.16298400 | 5.74499700  | 1.95599000  |
| H | -2.46774100 | 5.61062500  | 0.19197300  |

**S19E**

|   |             |             |             |
|---|-------------|-------------|-------------|
| O | 0.85145400  | -0.79364200 | -1.12736900 |
| O | 0.80922200  | -0.66922600 | 1.16775800  |
| C | 1.69136400  | -1.90699500 | -0.65490300 |
| C | 1.96435700  | -1.52188900 | 0.84530200  |
| C | 2.93155800  | -1.97561200 | -1.52770200 |
| H | 3.61610000  | -2.74345300 | -1.15188300 |
| H | 2.64388800  | -2.24547700 | -2.54850500 |
| H | 3.45660400  | -1.01855200 | -1.55528000 |
| C | 0.86193000  | -3.17683600 | -0.81195500 |
| H | 0.54845400  | -3.26768600 | -1.85656100 |
| H | 1.45052000  | -4.06174100 | -0.55115100 |
| H | -0.03236200 | -3.15644300 | -0.18182200 |
| C | 1.97571000  | -2.69747400 | 1.80699100  |
| H | 2.77086800  | -3.39829500 | 1.53197600  |
| H | 2.17461800  | -2.33687200 | 2.82082800  |
| H | 1.02217200  | -3.22967800 | 1.80828400  |
| C | 3.21469200  | -0.67158300 | 1.03754900  |
| H | 3.23171200  | -0.30066700 | 2.06705000  |
| H | 4.11688000  | -1.26862700 | 0.87256200  |
| H | 3.22371700  | 0.18702000  | 0.36269500  |
| B | 0.32548400  | -0.18441400 | -0.01870100 |

|            |             |             |             |
|------------|-------------|-------------|-------------|
| H          | -1.58193100 | 2.83326200  | -0.20672700 |
| C          | -0.74630900 | 2.13931200  | -0.15931700 |
| C          | -0.91036100 | 0.80462200  | -0.06094600 |
| C          | -2.25329000 | 0.20772000  | 0.04444200  |
| C          | -2.49833900 | -1.06279100 | -0.50069200 |
| C          | -3.30744700 | 0.87422000  | 0.69047600  |
| C          | -3.76286700 | -1.63587300 | -0.42748900 |
| H          | -1.69694200 | -1.59045500 | -1.01075100 |
| C          | -4.56633500 | 0.29362000  | 0.77216600  |
| H          | -3.12876500 | 1.83939300  | 1.15579600  |
| C          | -4.80100700 | -0.96085800 | 0.20982400  |
| H          | -3.93681200 | -2.61386100 | -0.86738200 |
| H          | -5.36770600 | 0.81767700  | 1.28554900  |
| H          | -5.78665000 | -1.41266200 | 0.27675900  |
| C          | 0.60267400  | 2.70211300  | -0.23768500 |
| O          | 1.63418700  | 2.04469400  | -0.21263200 |
| O          | 0.58227000  | 4.04446200  | -0.34623200 |
| C          | 1.87706500  | 4.68379100  | -0.43937200 |
| H          | 2.41334900  | 4.32384800  | -1.32149000 |
| H          | 1.66841400  | 5.74986600  | -0.52515600 |
| H          | 2.46635400  | 4.47777500  | 0.45817500  |
| <b>S20</b> |             |             |             |
| O          | 2.98292700  | 0.51560500  | 1.55183200  |
| O          | 1.59599800  | 0.64215000  | -0.32846600 |
| C          | 3.67573200  | 1.26300600  | 0.54169000  |
| C          | 2.95887400  | 0.79854100  | -0.76944800 |
| C          | 5.16098900  | 0.93120600  | 0.60358500  |
| H          | 5.69892100  | 1.40310300  | -0.22665500 |
| H          | 5.58398600  | 1.30925300  | 1.54063100  |
| H          | 5.32937100  | -0.14776000 | 0.56308800  |
| C          | 3.47170400  | 2.75793700  | 0.81381300  |
| H          | 3.81247900  | 2.97754100  | 1.83103100  |
| H          | 4.04404400  | 3.38098200  | 0.11796100  |
| H          | 2.41320700  | 3.02702800  | 0.73915800  |
| C          | 2.99425600  | 1.81124700  | -1.90669100 |
| H          | 4.02798600  | 2.03895200  | -2.19090700 |
| H          | 2.48450700  | 1.39830400  | -2.78473400 |
| H          | 2.49475600  | 2.74218800  | -1.62666700 |
| C          | 3.48998000  | -0.54907800 | -1.26885800 |
| H          | 2.85076900  | -0.90484200 | -2.08394900 |
| H          | 4.51030300  | -0.46065300 | -1.65750500 |
| H          | 3.48066800  | -1.29466500 | -0.46825400 |
| B          | 1.62258300  | 0.29770300  | 1.09251900  |
| H          | 0.73468000  | 0.85948700  | 1.72952300  |

|   |             |             |             |
|---|-------------|-------------|-------------|
| C | -0.96767100 | -1.00575600 | 0.97644900  |
| C | -1.85531400 | -0.52929300 | 0.12542900  |
| C | -3.01512300 | 0.32557300  | 0.51763600  |
| C | -4.33380700 | -0.04529900 | 0.23507600  |
| C | -2.77603200 | 1.52840700  | 1.19132800  |
| C | -5.39335000 | 0.77173800  | 0.62198500  |
| H | -4.53732200 | -0.99177100 | -0.25843800 |
| C | -3.83544700 | 2.34596200  | 1.57131100  |
| H | -1.75037100 | 1.81159900  | 1.41295600  |
| C | -5.14709900 | 1.97134700  | 1.28530600  |
| H | -6.41413500 | 0.46499700  | 0.41104700  |
| H | -3.63637700 | 3.27875100  | 2.09184500  |
| H | -5.97445400 | 2.60929800  | 1.58329200  |
| C | 0.17629200  | -1.72518400 | 1.14326600  |
| O | 1.36912300  | -1.24065900 | 1.29426500  |
| O | 0.03564000  | -3.06443700 | 1.29553300  |
| C | 1.18164100  | -3.78588900 | 1.80096600  |
| H | 1.47405200  | -3.40909000 | 2.78544500  |
| H | 0.84896500  | -4.82163700 | 1.87782200  |
| H | 2.02663400  | -3.70946600 | 1.11131800  |
| P | -1.54453500 | -0.66259000 | -1.66738400 |
| C | -0.18044600 | -1.80267500 | -1.96523300 |
| H | 0.70963800  | -1.42085500 | -1.45711500 |
| H | -0.43906600 | -2.79539800 | -1.58564700 |
| H | 0.00072800  | -1.85196400 | -3.04375400 |
| C | -1.09230100 | 0.97573000  | -2.29088800 |
| H | -1.90766000 | 1.67608200  | -2.08356300 |
| H | -0.18165100 | 1.28991200  | -1.76954300 |
| H | -0.91662000 | 0.92456800  | -3.37033400 |
| C | -2.97356500 | -1.23458700 | -2.63040500 |
| H | -3.31044100 | -2.20589800 | -2.25700300 |
| H | -3.78758100 | -0.50834100 | -2.55966100 |
| H | -2.66576700 | -1.33007600 | -3.67721600 |

**S21Z**

|   |            |             |             |
|---|------------|-------------|-------------|
| O | 2.26328600 | -0.30747600 | 0.31481600  |
| O | 3.51242600 | 1.22455100  | -0.87959800 |
| C | 3.48410200 | -0.07464500 | 1.09639600  |
| C | 4.44921100 | 0.54311900  | 0.02334200  |
| C | 3.94766400 | -1.39489100 | 1.68214900  |
| H | 4.90794700 | -1.26200000 | 2.19147900  |
| H | 3.21694600 | -1.74622500 | 2.41724200  |
| H | 4.06062600 | -2.16021800 | 0.91131800  |
| C | 3.11248100 | 0.90627200  | 2.20378900  |
| H | 2.29212700 | 0.48076200  | 2.78950700  |

|   |             |             |             |
|---|-------------|-------------|-------------|
| H | 3.95966000  | 1.08400700  | 2.87297000  |
| H | 2.78347300  | 1.86565300  | 1.79126900  |
| C | 5.43266500  | 1.56032200  | 0.57071600  |
| H | 6.07662300  | 1.08967700  | 1.32110100  |
| H | 6.06736200  | 1.93103000  | -0.23995800 |
| H | 4.92064300  | 2.40919600  | 1.02872700  |
| C | 5.17103400  | -0.51253300 | -0.80675900 |
| H | 5.66930400  | -0.02114000 | -1.64783300 |
| H | 5.92950300  | -1.02953200 | -0.21133900 |
| H | 4.47090100  | -1.25478300 | -1.20438700 |
| B | 2.30988100  | 0.57880300  | -0.73288100 |
| H | -0.34573400 | 1.72010100  | 0.08486400  |
| C | -0.77753400 | 0.84672900  | -0.40252700 |
| C | -2.09239900 | 0.35964200  | 0.01750800  |
| C | -2.40673500 | -1.05003200 | 0.13687100  |
| C | -3.72578300 | -1.56871100 | 0.08625000  |
| C | -1.37847400 | -2.00698600 | 0.33872500  |
| C | -3.99448000 | -2.92087300 | 0.26655400  |
| H | -4.56232300 | -0.90857500 | -0.12697300 |
| C | -1.65179600 | -3.35510900 | 0.50518400  |
| H | -0.34981200 | -1.66138500 | 0.38165300  |
| C | -2.96461500 | -3.83672600 | 0.47804600  |
| H | -5.02548100 | -3.26467800 | 0.21680800  |
| H | -0.82545000 | -4.04481200 | 0.66617300  |
| H | -3.17482000 | -4.89465400 | 0.60392900  |
| C | 0.00872700  | 0.32363800  | -1.35939000 |
| O | 1.28451500  | 0.81914200  | -1.60752900 |
| O | -0.38405300 | -0.64547600 | -2.21991800 |
| C | 0.58943300  | -1.66830900 | -2.52177200 |
| H | 0.96604700  | -2.13157700 | -1.60262100 |
| H | 0.06119800  | -2.41400500 | -3.11780600 |
| H | 1.42360200  | -1.25709100 | -3.09981900 |
| P | -3.29640700 | 1.57016900  | 0.31549200  |
| C | -2.51009300 | 3.19633500  | 0.53293300  |
| H | -1.77235400 | 3.15383100  | 1.33898300  |
| H | -2.02166700 | 3.50892800  | -0.39391800 |
| H | -3.28820300 | 3.92137300  | 0.79033000  |
| C | -4.25953700 | 1.29183700  | 1.84183000  |
| H | -4.66952400 | 0.27973600  | 1.86308100  |
| H | -3.59230900 | 1.42091700  | 2.69922500  |
| H | -5.07953900 | 2.01439400  | 1.90060300  |
| C | -4.55784800 | 1.89563500  | -0.98660200 |
| H | -4.03719700 | 2.13897900  | -1.91827000 |
| H | -5.17935600 | 1.01144600  | -1.15112000 |



|             |             |             |             |
|-------------|-------------|-------------|-------------|
| H           | -5.19730200 | 2.73588400  | -0.69375500 |
| <b>S21E</b> |             |             |             |
| O           | 1.64858600  | -0.88845000 | 1.56756200  |
| O           | 1.76125400  | -0.27564000 | -0.65512800 |
| C           | 2.39530000  | 0.37806300  | 1.53037900  |
| C           | 2.82810000  | 0.46789000  | 0.02283000  |
| C           | 3.54619300  | 0.29255500  | 2.51598900  |
| H           | 4.17375000  | 1.18671300  | 2.43804500  |
| H           | 3.15218500  | 0.24068600  | 3.53568900  |
| H           | 4.16605400  | -0.58845500 | 2.33648300  |
| C           | 1.42206800  | 1.47920500  | 1.93437600  |
| H           | 1.02561100  | 1.25433400  | 2.92906500  |
| H           | 1.92761500  | 2.44883800  | 1.97647700  |
| H           | 0.58424600  | 1.54998900  | 1.23217800  |
| C           | 2.87270300  | 1.87718000  | -0.53904800 |
| H           | 3.60212500  | 2.47973700  | 0.01273400  |
| H           | 3.18239300  | 1.84180500  | -1.58826600 |
| H           | 1.89587400  | 2.36357400  | -0.48379200 |
| C           | 4.12923100  | -0.27150400 | -0.27167200 |
| H           | 4.26350800  | -0.32939500 | -1.35601000 |
| H           | 4.98772500  | 0.25628800  | 0.15464800  |
| H           | 4.10692700  | -1.28964700 | 0.13026000  |
| B           | 1.21520000  | -1.10843100 | 0.28505200  |
| H           | -1.76373400 | -1.27853000 | -2.36813100 |
| C           | -1.26533300 | -1.20893000 | -1.39822800 |
| C           | -1.60361600 | -0.12872300 | -0.45289700 |
| C           | -1.42441900 | 1.24874200  | -0.83647700 |
| C           | -0.82729400 | 1.57484800  | -2.08509400 |
| C           | -1.78557100 | 2.35834100  | -0.02387300 |
| C           | -0.62521800 | 2.88825800  | -2.48331700 |
| H           | -0.49978700 | 0.76666300  | -2.73275300 |
| C           | -1.57449000 | 3.66885700  | -0.42947200 |
| H           | -2.22172500 | 2.19881200  | 0.95798300  |
| C           | -0.99502600 | 3.95938800  | -1.66648400 |
| H           | -0.16079700 | 3.07968900  | -3.44879100 |
| H           | -1.86521600 | 4.47853900  | 0.23667600  |
| H           | -0.83200200 | 4.98606100  | -1.98025000 |
| C           | -0.35673100 | -2.16013300 | -1.14647200 |
| O           | 0.40551100  | -2.18899300 | 0.00052900  |
| O           | -0.21138900 | -3.25963200 | -1.92861200 |
| C           | 1.15628700  | -3.64066000 | -2.19975800 |
| H           | 1.65705000  | -3.98557100 | -1.28996800 |
| H           | 1.09939400  | -4.45560900 | -2.92256600 |
| H           | 1.70815000  | -2.79659800 | -2.63085200 |

|   |             |             |            |
|---|-------------|-------------|------------|
| P | -2.52394100 | -0.57955300 | 0.94921800 |
| C | -1.81094700 | -0.15824900 | 2.58384700 |
| H | -0.82828600 | -0.63224300 | 2.66799900 |
| H | -1.68769900 | 0.92211200  | 2.69287200 |
| H | -2.47319100 | -0.52411800 | 3.37578500 |
| C | -2.74761500 | -2.38027300 | 1.01081200 |
| H | -3.22998600 | -2.72764900 | 0.09376600 |
| H | -1.78159100 | -2.87750600 | 1.12517400 |
| H | -3.38233400 | -2.61361700 | 1.87158200 |
| C | -4.23593700 | 0.08480200  | 1.02914100 |
| H | -4.23434400 | 1.17558700  | 0.96522000 |
| H | -4.80129400 | -0.31753600 | 0.18287900 |
| H | -4.71081400 | -0.22039700 | 1.96760700 |

**S22**

|   |             |             |             |
|---|-------------|-------------|-------------|
| C | 3.02720300  | 1.49391900  | 0.19328000  |
| C | 3.88172900  | 0.56088400  | -0.73317100 |
| C | 3.80154300  | 2.16193100  | 1.31386100  |
| H | 4.59235000  | 2.79529700  | 0.89825200  |
| H | 3.12724200  | 2.79539100  | 1.89828700  |
| H | 4.25535500  | 1.42666800  | 1.98189900  |
| C | 2.20947900  | 2.52052000  | -0.58411900 |
| H | 1.49566100  | 2.99319000  | 0.09751900  |
| H | 2.85320900  | 3.29912900  | -1.00467200 |
| H | 1.65008100  | 2.04936100  | -1.39916100 |
| C | 4.41141000  | 1.22838000  | -1.98900600 |
| H | 5.06685300  | 2.06426200  | -1.72241300 |
| H | 4.99638300  | 0.50752800  | -2.56846900 |
| H | 3.60093400  | 1.60374000  | -2.61763100 |
| C | 5.00611700  | -0.14892400 | 0.01444500  |
| H | 5.42923600  | -0.92154600 | -0.63449600 |
| H | 5.80271700  | 0.55163800  | 0.28224400  |
| H | 4.63622400  | -0.62648300 | 0.92772700  |
| B | 1.96042600  | -0.49054600 | -0.11734200 |
| H | -0.29125800 | 0.54819700  | 1.75932100  |
| C | -0.72489300 | -0.16051300 | 1.05873300  |
| C | -1.84856600 | -0.06893700 | 0.32790900  |
| C | -2.73798300 | 1.08490000  | 0.20281900  |
| C | -4.07701200 | 0.92143700  | -0.19182800 |
| C | -2.27385100 | 2.39471900  | 0.42710600  |
| C | -4.92440400 | 2.01656700  | -0.32693200 |
| H | -4.45863900 | -0.07581600 | -0.39286800 |
| C | -3.11873400 | 3.48820500  | 0.28551900  |
| H | -1.23321900 | 2.54783100  | 0.70227900  |
| C | -4.45051100 | 3.30457800  | -0.08804600 |

|   |             |             |             |
|---|-------------|-------------|-------------|
| H | -5.95789800 | 1.86401100  | -0.62639200 |
| H | -2.73749800 | 4.49075700  | 0.46158600  |
| H | -5.11029200 | 4.16034500  | -0.20070300 |
| C | -0.15314300 | -1.50335900 | 0.71451100  |
| O | 1.04872000  | -1.50187200 | -0.07847600 |
| O | -0.01703900 | -2.43915100 | 1.74504000  |
| C | 0.98401900  | -2.10967800 | 2.72424300  |
| H | 0.77670800  | -1.13908400 | 3.19143000  |
| H | 0.94114900  | -2.89460600 | 3.48188300  |
| H | 1.98500200  | -2.09457300 | 2.27613500  |
| P | -1.67839000 | -1.91839400 | -0.43151100 |
| C | -3.15244200 | -2.64482600 | 0.39884000  |
| H | -2.78960900 | -3.24846700 | 1.23765600  |
| H | -3.83171800 | -1.88079500 | 0.78032500  |
| H | -3.67626900 | -3.30777800 | -0.29699600 |
| C | -0.96112400 | -3.60954400 | -0.96965300 |
| H | -0.06252200 | -3.45620900 | -1.57774000 |
| H | -0.68216500 | -4.19888600 | -0.08948600 |
| H | -1.68843800 | -4.17596200 | -1.56214100 |
| C | -1.98449100 | -1.36898200 | -2.17262200 |
| H | -2.71432000 | -0.55609000 | -2.20005500 |
| H | -1.03021200 | -0.98589500 | -2.55557100 |
| H | -2.30183500 | -2.20098700 | -2.80790900 |
| O | 2.07060700  | 0.54835300  | 0.77889300  |
| O | 2.90918600  | -0.46588000 | -1.11608800 |

**S23**

|   |             |            |             |
|---|-------------|------------|-------------|
| O | -0.95021300 | 1.28300400 | 1.29198600  |
| O | -0.59718800 | 1.22606900 | -1.01246000 |
| C | -1.78768300 | 2.28910600 | 0.70372200  |
| C | -1.11411300 | 2.52855100 | -0.69232800 |
| C | -1.80286000 | 3.51730300 | 1.60803600  |
| H | -2.35977500 | 4.33768400 | 1.14032400  |
| H | -2.29607300 | 3.27016500 | 2.55451200  |
| H | -0.78980900 | 3.86197100 | 1.82959300  |
| C | -3.21046200 | 1.73591500 | 0.58554600  |
| H | -3.54506600 | 1.41973600 | 1.57956900  |
| H | -3.91155200 | 2.49081000 | 0.21278100  |
| H | -3.24218400 | 0.86593900 | -0.07605700 |
| C | -2.07532500 | 2.96401900 | -1.79124000 |
| H | -2.56930100 | 3.90521400 | -1.52402600 |
| H | -1.52251600 | 3.12423600 | -2.72354800 |
| H | -2.84146200 | 2.20560700 | -1.97232200 |
| C | 0.05456300  | 3.51871500 | -0.61511300 |
| H | 0.60664300  | 3.48016200 | -1.56069900 |

|                           |             |             |             |
|---------------------------|-------------|-------------|-------------|
| H                         | -0.29311800 | 4.54625800  | -0.46201600 |
| H                         | 0.74056800  | 3.25260200  | 0.19394500  |
| B                         | -0.21819700 | 0.57873300  | 0.24183500  |
| H                         | 1.14725100  | -2.63642900 | 0.51571500  |
| C                         | 0.87607100  | -1.58230600 | 0.45877600  |
| C                         | -0.33287500 | -1.05334600 | 0.22325900  |
| C                         | -1.54265600 | -1.85837400 | 0.01946600  |
| C                         | -1.82405600 | -2.98235200 | 0.81248400  |
| C                         | -2.45086600 | -1.51599000 | -0.99490000 |
| C                         | -2.97024300 | -3.74011300 | 0.59496900  |
| H                         | -1.14114400 | -3.24756600 | 1.61607100  |
| C                         | -3.58987500 | -2.28252100 | -1.21961600 |
| H                         | -2.23967100 | -0.64631600 | -1.61090400 |
| C                         | -3.85723100 | -3.39551600 | -0.42419500 |
| H                         | -3.17481300 | -4.60139800 | 1.22575700  |
| H                         | -4.27571100 | -2.00762300 | -2.01695600 |
| H                         | -4.75215000 | -3.98799300 | -0.59368400 |
| C                         | 1.92003200  | -0.50843700 | 0.60438800  |
| O                         | 1.29916700  | 0.71234200  | 0.54179000  |
| O                         | 2.78532100  | -0.65833700 | 1.72964000  |
| C                         | 2.08207300  | -0.63609800 | 2.98419000  |
| H                         | 1.42602600  | -1.50966300 | 3.08460800  |
| H                         | 2.84950300  | -0.66073700 | 3.76030100  |
| H                         | 1.48714700  | 0.27929300  | 3.08057900  |
| P                         | 3.12966200  | -0.54142300 | -0.83682700 |
| C                         | 4.12167900  | -2.05392300 | -0.89159600 |
| H                         | 4.72403800  | -2.12295500 | 0.01852200  |
| H                         | 3.45731200  | -2.92052300 | -0.95940700 |
| H                         | 4.77880100  | -2.02927400 | -1.76702100 |
| C                         | 4.22546000  | 0.88703900  | -0.67794800 |
| H                         | 3.61366600  | 1.79261300  | -0.63694200 |
| H                         | 4.80824400  | 0.79509400  | 0.24251000  |
| H                         | 4.89754000  | 0.92971400  | -1.54070500 |
| C                         | 2.15238900  | -0.38376400 | -2.34452300 |
| H                         | 2.81001400  | -0.13867700 | -3.18395400 |
| H                         | 1.63279800  | -1.32524000 | -2.54383600 |
| H                         | 1.41351600  | 0.41172200  | -2.19111700 |
| <b>TS<sub>1/S13</sub></b> |             |             |             |
| C                         | -0.85391700 | -1.16306500 | 0.01840800  |
| C                         | 0.24487900  | -0.59025800 | -0.04370300 |
| C                         | 1.68307700  | -0.70401700 | -0.07943500 |
| C                         | 2.27291200  | -1.79070700 | 0.58929600  |
| C                         | 2.50351000  | 0.18818500  | -0.78035000 |
| C                         | 3.65020000  | -1.97096400 | 0.55427300  |

|                             |             |             |             |
|-----------------------------|-------------|-------------|-------------|
| H                           | 1.63858600  | -2.48360400 | 1.13389800  |
| C                           | 3.87893500  | -0.00551100 | -0.82065900 |
| H                           | 2.05199900  | 1.03302300  | -1.29127600 |
| C                           | 4.45880400  | -1.08108800 | -0.15021400 |
| H                           | 4.09372200  | -2.80954700 | 1.08382300  |
| H                           | 4.50205500  | 0.69055300  | -1.37509600 |
| H                           | 5.53545600  | -1.22313600 | -0.17417700 |
| C                           | -2.23115800 | -1.42180400 | 0.18803800  |
| O                           | -2.79792100 | -1.51370000 | 1.27309300  |
| O                           | -2.87014900 | -1.58999600 | -1.00056700 |
| C                           | -4.28548700 | -1.87048700 | -0.90255300 |
| H                           | -4.80685600 | -1.04261100 | -0.41371200 |
| H                           | -4.62789200 | -1.98209000 | -1.93146000 |
| H                           | -4.45473900 | -2.79279900 | -0.34005600 |
| P                           | -0.27539500 | 1.87091200  | 0.09643000  |
| C                           | -1.67285300 | 2.02471700  | -1.09324900 |
| H                           | -1.27879900 | 2.22865000  | -2.09407900 |
| H                           | -2.23638500 | 1.08712300  | -1.12866900 |
| H                           | -2.34777000 | 2.83647000  | -0.79927900 |
| C                           | 0.43223900  | 3.58442600  | 0.06807200  |
| H                           | 1.21645600  | 3.66641700  | 0.82732600  |
| H                           | 0.87781300  | 3.77918200  | -0.91259900 |
| H                           | -0.34275900 | 4.33434400  | 0.26772200  |
| C                           | -1.14845300 | 1.85096200  | 1.71826200  |
| H                           | -1.73372600 | 0.93068500  | 1.80706800  |
| H                           | -0.41405900 | 1.87363800  | 2.52992800  |
| H                           | -1.81606400 | 2.71503900  | 1.81200100  |
| <b>TS<sub>SI3/SI4</sub></b> |             |             |             |
| C                           | 1.15425500  | -0.45695300 | 0.92577100  |
| C                           | 2.12856000  | -0.07476400 | 0.08645000  |
| C                           | 2.54771200  | 1.31992200  | -0.23091200 |
| C                           | 1.59242900  | 2.25818800  | -0.64516900 |
| C                           | 3.87578700  | 1.74037800  | -0.07985400 |
| C                           | 1.95539800  | 3.57816200  | -0.89391700 |
| H                           | 0.56118800  | 1.94120700  | -0.77039800 |
| C                           | 4.23800100  | 3.06094200  | -0.33000800 |
| H                           | 4.63102700  | 1.03607700  | 0.26188800  |
| C                           | 3.27935200  | 3.98524700  | -0.73881700 |
| H                           | 1.20113900  | 4.29091400  | -1.21654700 |
| H                           | 5.27104100  | 3.37051000  | -0.19544200 |
| H                           | 3.56182400  | 5.01589100  | -0.93425100 |
| C                           | 0.32226900  | 0.45627000  | 1.64418500  |
| O                           | -0.83196400 | 0.76220000  | 1.33276400  |
| O                           | 0.88663800  | 0.87452600  | 2.81871200  |

|                             |             |             |             |
|-----------------------------|-------------|-------------|-------------|
| C                           | 0.00370400  | 1.58320800  | 3.71117700  |
| H                           | -0.85962000 | 0.96269300  | 3.97092700  |
| H                           | 0.59697700  | 1.79487400  | 4.60211800  |
| H                           | -0.34325600 | 2.51712000  | 3.25863600  |
| P                           | 3.00863500  | -1.43953300 | -0.71297900 |
| C                           | 4.24450500  | -2.20106500 | 0.37671300  |
| H                           | 5.00505300  | -1.46362300 | 0.64851300  |
| H                           | 3.74127500  | -2.55298400 | 1.28210100  |
| H                           | 4.71710100  | -3.04525100 | -0.13565300 |
| C                           | 3.86004800  | -0.90885500 | -2.22511400 |
| H                           | 3.14201500  | -0.41479500 | -2.88714600 |
| H                           | 4.66463500  | -0.20988100 | -1.98335900 |
| H                           | 4.27837900  | -1.78637200 | -2.72772300 |
| C                           | 1.83471100  | -2.73302000 | -1.17075300 |
| H                           | 1.29834400  | -3.05561500 | -0.27319600 |
| H                           | 1.12009000  | -2.32807100 | -1.89361300 |
| H                           | 2.37946700  | -3.57321400 | -1.61339000 |
| O                           | -0.28964900 | -2.03111400 | 3.31950300  |
| O                           | 0.23499700  | -3.61869800 | 1.73934200  |
| C                           | -1.50761300 | -2.81691700 | 3.11780700  |
| C                           | -1.23001200 | -3.53571800 | 1.75200700  |
| C                           | -2.70227200 | -1.87891200 | 3.10794600  |
| H                           | -3.61764600 | -2.43263000 | 2.87210500  |
| H                           | -2.82141600 | -1.43040500 | 4.09961800  |
| H                           | -2.57070700 | -1.07631300 | 2.37902000  |
| C                           | -1.59981700 | -3.78345500 | 4.29619000  |
| H                           | -1.60363800 | -3.20584300 | 5.22565700  |
| H                           | -2.52042000 | -4.37403700 | 4.25409400  |
| H                           | -0.74350700 | -4.46503300 | 4.31622200  |
| C                           | -1.79457500 | -4.94233600 | 1.64800600  |
| H                           | -2.88547000 | -4.91721900 | 1.74395200  |
| H                           | -1.54885400 | -5.36177600 | 0.66721800  |
| H                           | -1.38939800 | -5.60172400 | 2.41882600  |
| C                           | -1.64946600 | -2.70587400 | 0.54312700  |
| H                           | -1.28731200 | -3.19779000 | -0.36565800 |
| H                           | -2.73955700 | -2.63194800 | 0.47939000  |
| H                           | -1.22084900 | -1.70019500 | 0.58982100  |
| B                           | 0.70148100  | -2.60187300 | 2.54978400  |
| H                           | 1.86178500  | -2.45452900 | 2.77596600  |
| <b>TS<sub>S14/S15</sub></b> |             |             |             |
| C                           | 0.83395200  | -0.11323300 | 0.94970700  |
| C                           | 1.71211300  | 0.03022900  | -0.13604500 |
| C                           | 2.70774400  | 1.13481700  | -0.13076700 |
| C                           | 2.84819600  | 2.03907200  | -1.19532200 |

|   |             |             |             |
|---|-------------|-------------|-------------|
| C | 3.50600900  | 1.33713300  | 1.00742500  |
| C | 3.76218400  | 3.08597600  | -1.13278100 |
| H | 2.20810800  | 1.93943900  | -2.06702900 |
| C | 4.41088500  | 2.39196800  | 1.07677400  |
| H | 3.40836400  | 0.65063700  | 1.84532200  |
| C | 4.54943700  | 3.26928700  | 0.00315200  |
| H | 3.84414500  | 3.77700200  | -1.96786400 |
| H | 5.01629600  | 2.52398300  | 1.97001000  |
| H | 5.25632500  | 4.09273500  | 0.05374500  |
| C | 0.42589300  | 1.16612500  | 1.61221200  |
| O | -0.17691800 | 2.03733200  | 1.00961700  |
| O | 0.73878100  | 1.26113300  | 2.91714600  |
| C | 0.24874700  | 2.44637700  | 3.58760700  |
| H | -0.84270500 | 2.48780400  | 3.53697100  |
| H | 0.58137800  | 2.35039400  | 4.62122600  |
| H | 0.67324900  | 3.34384600  | 3.12929200  |
| P | 1.88365800  | -1.26200100 | -1.31550000 |
| C | 2.84383100  | -2.69446300 | -0.71700300 |
| H | 2.35684500  | -3.10957400 | 0.16856300  |
| H | 2.90378500  | -3.45635900 | -1.50137300 |
| H | 3.85202200  | -2.35270200 | -0.46103400 |
| C | 2.78533200  | -0.72233400 | -2.79719400 |
| H | 2.20481500  | 0.01687200  | -3.35382700 |
| H | 3.75368600  | -0.29666700 | -2.52135400 |
| H | 2.94392900  | -1.60482400 | -3.42560600 |
| C | 0.28140700  | -1.88293900 | -1.89049600 |
| H | 0.43998900  | -2.71300700 | -2.58669800 |
| H | -0.29347700 | -2.23113000 | -1.03088400 |
| H | -0.25241400 | -1.07059600 | -2.39224000 |
| O | -0.99288300 | -1.19170600 | 2.42929600  |
| O | 0.30563800  | -2.71168000 | 1.23812400  |
| C | -1.27734400 | -2.50263000 | 2.97333100  |
| C | -0.81563100 | -3.44170500 | 1.80726700  |
| C | -2.75804600 | -2.58566800 | 3.30742200  |
| H | -3.02477700 | -3.60432500 | 3.60938200  |
| H | -2.98383900 | -1.91299100 | 4.14123800  |
| H | -3.37716700 | -2.29705500 | 2.45478300  |
| C | -0.44268200 | -2.68536400 | 4.24197000  |
| H | -0.67644300 | -1.86983600 | 4.93385300  |
| H | -0.66796800 | -3.63464700 | 4.73837500  |
| H | 0.62911700  | -2.65147600 | 4.02065700  |
| C | -0.33117000 | -4.81317500 | 2.25210500  |
| H | -1.13430400 | -5.35181600 | 2.76720800  |
| H | -0.03399700 | -5.40063400 | 1.37695700  |

|                             |             |             |             |
|-----------------------------|-------------|-------------|-------------|
| H                           | 0.52701500  | -4.73606800 | 2.92362200  |
| C                           | -1.88226100 | -3.59084200 | 0.72325400  |
| H                           | -1.44741100 | -4.10736300 | -0.13876200 |
| H                           | -2.72934400 | -4.18467500 | 1.08136100  |
| H                           | -2.25256800 | -2.61317000 | 0.39817900  |
| B                           | 0.18089600  | -1.34981900 | 1.64202000  |
| H                           | 1.32476600  | -0.91821700 | 2.24244700  |
| <b>TS<sub>S15/S16</sub></b> |             |             |             |
| C                           | 2.14179200  | -0.72384500 | 1.84501400  |
| C                           | 1.62055200  | -0.47526600 | 0.40195900  |
| C                           | 1.54775200  | 0.91471600  | -0.12221400 |
| C                           | 2.56319000  | 1.86413500  | 0.11366100  |
| C                           | 0.46713500  | 1.32858900  | -0.92179600 |
| C                           | 2.49944000  | 3.14821700  | -0.41260900 |
| H                           | 3.42641400  | 1.57980700  | 0.71314300  |
| C                           | 0.41064700  | 2.60714000  | -1.47102900 |
| H                           | -0.34429400 | 0.62672200  | -1.09795400 |
| C                           | 1.42266800  | 3.52975900  | -1.21502800 |
| H                           | 3.30234600  | 3.85317700  | -0.20975600 |
| H                           | -0.44132000 | 2.89093700  | -2.08440100 |
| H                           | 1.37337000  | 4.53271400  | -1.62991300 |
| C                           | 2.20910200  | 0.48006500  | 2.73843300  |
| O                           | 1.40003200  | 1.38221300  | 2.81157400  |
| O                           | 3.29038300  | 0.40398100  | 3.55961100  |
| C                           | 3.38706500  | 1.44943000  | 4.55383400  |
| H                           | 2.51172600  | 1.43624000  | 5.20957500  |
| H                           | 4.29196900  | 1.22875900  | 5.12053300  |
| H                           | 3.46646500  | 2.42771400  | 4.07163900  |
| P                           | 2.25954800  | -1.54812300 | -0.78666800 |
| C                           | 2.18729800  | -3.30815000 | -0.33566900 |
| H                           | 1.14759600  | -3.61951200 | -0.21564200 |
| H                           | 2.66038900  | -3.88965400 | -1.13354700 |
| H                           | 2.71882900  | -3.48358500 | 0.60301300  |
| C                           | 4.03975100  | -1.31162700 | -1.22182000 |
| H                           | 4.18391300  | -0.28906500 | -1.58569900 |
| H                           | 4.64980900  | -1.45556300 | -0.32372600 |
| H                           | 4.36076300  | -2.02116900 | -1.99196200 |
| C                           | 1.41871000  | -1.40262900 | -2.39332900 |
| H                           | 1.87976300  | -2.10939500 | -3.09106500 |
| H                           | 0.35588300  | -1.63226600 | -2.28132100 |
| H                           | 1.52926400  | -0.38707800 | -2.78252000 |
| O                           | -0.18757900 | -1.18214200 | 2.93730600  |
| O                           | 1.17862300  | -3.00583500 | 2.67164600  |
| C                           | -0.80892900 | -2.26273400 | 3.70539800  |



|   |             |             |            |
|---|-------------|-------------|------------|
| C | -0.12517700 | -3.53534800 | 3.10035900 |
| C | -2.31381800 | -2.19651800 | 3.51656500 |
| H | -2.79412500 | -3.05087500 | 4.00536300 |
| H | -2.69903100 | -1.28036900 | 3.97458600 |
| H | -2.58724100 | -2.19627900 | 2.45915100 |
| C | -0.44186300 | -2.02468600 | 5.16739600 |
| H | -0.78934500 | -1.02941000 | 5.46037400 |
| H | -0.91809700 | -2.76345700 | 5.81925100 |
| H | 0.64199900  | -2.07001400 | 5.31587700 |
| C | 0.11068800  | -4.66373400 | 4.08786900 |
| H | -0.84406600 | -5.00805100 | 4.49944500 |
| H | 0.58550100  | -5.50674700 | 3.57633300 |
| H | 0.75477200  | -4.34925000 | 4.91185200 |
| C | -0.83001900 | -4.05428500 | 1.85274200 |
| H | -0.21292300 | -4.83123800 | 1.39148800 |
| H | -1.79917600 | -4.49347800 | 2.10777500 |
| H | -0.98769600 | -3.25248500 | 1.12345800 |
| B | 1.02190900  | -1.65331800 | 2.48339900 |
| H | 3.11966800  | -1.22407300 | 1.89788900 |

**TS<sub>S15/S21E</sub>**

|   |            |             |             |
|---|------------|-------------|-------------|
| C | 2.60445800 | -0.64882200 | 2.17854800  |
| C | 3.01938900 | -0.53650800 | 0.74869900  |
| C | 2.70197800 | 0.61188800  | -0.07526800 |
| C | 2.45794400 | 0.51144600  | -1.46824400 |
| C | 2.64639300 | 1.92485900  | 0.46224500  |
| C | 2.25385300 | 1.63107600  | -2.26722800 |
| H | 2.40120500 | -0.46857300 | -1.93406300 |
| C | 2.42673700 | 3.03625500  | -0.33537600 |
| H | 2.81780700 | 2.07713200  | 1.52503300  |
| C | 2.23590300 | 2.91030900  | -1.71526900 |
| H | 2.07603600 | 1.49522500  | -3.33178400 |
| H | 2.41067400 | 4.02152100  | 0.12536000  |
| H | 2.05609600 | 3.78383500  | -2.33470900 |
| C | 1.78416200 | 0.32105400  | 2.79360400  |
| O | 0.57379800 | 0.39328300  | 2.28562800  |
| O | 2.07885500 | 0.88403000  | 3.95137900  |
| C | 0.96942700 | 1.44178600  | 4.71667500  |
| H | 0.19578600 | 0.68227100  | 4.85297000  |
| H | 1.40411100 | 1.73240400  | 5.67230300  |
| H | 0.56084000 | 2.31203800  | 4.19935300  |
| P | 3.73030000 | -1.95209400 | 0.04549700  |
| C | 4.45740800 | -2.97715300 | 1.36282500  |
| H | 3.67395400 | -3.37700600 | 2.01213700  |
| H | 4.98971300 | -3.81193700 | 0.89682300  |

|                             |             |             |             |
|-----------------------------|-------------|-------------|-------------|
| H                           | 5.15752400  | -2.38470300 | 1.95827600  |
| C                           | 5.11442100  | -1.50841300 | -1.05705500 |
| H                           | 4.78094500  | -0.80613500 | -1.82425100 |
| H                           | 5.90294000  | -1.03946900 | -0.46191200 |
| H                           | 5.50064300  | -2.41192600 | -1.53900200 |
| C                           | 2.75576800  | -3.18096400 | -0.92173400 |
| H                           | 3.39926400  | -4.02046800 | -1.20841400 |
| H                           | 1.93387300  | -3.53348800 | -0.29517700 |
| H                           | 2.33734600  | -2.72223900 | -1.82165400 |
| O                           | 0.26955600  | -1.84963100 | 3.28006300  |
| O                           | 0.35265200  | -1.77042200 | 0.95529700  |
| C                           | -0.42458900 | -3.01986300 | 2.78334200  |
| C                           | -0.79817000 | -2.58044000 | 1.32889500  |
| C                           | -1.61767000 | -3.30819700 | 3.68153100  |
| H                           | -2.21963900 | -4.12367600 | 3.26550500  |
| H                           | -1.26828800 | -3.61500500 | 4.67289800  |
| H                           | -2.25165400 | -2.42612100 | 3.79662300  |
| C                           | 0.54764500  | -4.19867500 | 2.80820300  |
| H                           | 0.94375700  | -4.30784800 | 3.82291400  |
| H                           | 0.05215600  | -5.13435700 | 2.52922900  |
| H                           | 1.38635800  | -4.02958800 | 2.12540400  |
| C                           | -0.95639900 | -3.72172800 | 0.33848900  |
| H                           | -1.79011400 | -4.36549900 | 0.63993300  |
| H                           | -1.17918700 | -3.31989900 | -0.65554600 |
| H                           | -0.05572900 | -4.33506200 | 0.27033300  |
| C                           | -2.03744000 | -1.68423400 | 1.28857100  |
| H                           | -2.11625400 | -1.23815100 | 0.29211700  |
| H                           | -2.95014700 | -2.25673700 | 1.48289100  |
| H                           | -1.96660400 | -0.87743700 | 2.02452000  |
| B                           | 0.79045300  | -1.15453800 | 2.14892600  |
| H                           | 3.31202600  | -1.10955800 | 2.87126100  |
| <b>TS<sub>S16/S17</sub></b> |             |             |             |
| C                           | 2.30707700  | -0.77234800 | 1.73025700  |
| C                           | 1.75858500  | -0.64723100 | 0.30913700  |
| C                           | 1.61598400  | 0.71736100  | -0.31934100 |
| C                           | 2.58329800  | 1.70782600  | -0.12072000 |
| C                           | 0.52980700  | 0.99574000  | -1.15506200 |
| C                           | 2.47377000  | 2.94050100  | -0.75263800 |
| H                           | 3.41684000  | 1.50412100  | 0.54597600  |
| C                           | 0.41860500  | 2.23122500  | -1.78867200 |
| H                           | -0.24171000 | 0.24260700  | -1.29584900 |
| C                           | 1.39096100  | 3.20808800  | -1.59067100 |
| H                           | 3.23176000  | 3.70117200  | -0.58496200 |
| H                           | -0.43500800 | 2.43265600  | -2.43040000 |

|   |             |             |             |
|---|-------------|-------------|-------------|
| H | 1.30224000  | 4.17526100  | -2.07782600 |
| C | 2.14241000  | 0.20891800  | 2.71997300  |
| O | 1.54883800  | 1.29537100  | 2.66638100  |
| O | 2.74255200  | -0.19795100 | 3.92428600  |
| C | 2.50863200  | 0.67020500  | 5.03729700  |
| H | 1.43823200  | 0.76190400  | 5.25560700  |
| H | 3.01885700  | 0.20818400  | 5.88574900  |
| H | 2.91766200  | 1.67149200  | 4.86149100  |
| P | 2.66180000  | -1.69554000 | -0.86495600 |
| C | 3.19418400  | -3.27557400 | -0.15623900 |
| H | 2.34081600  | -3.78404800 | 0.29703000  |
| H | 3.60828000  | -3.88175100 | -0.96854600 |
| H | 3.97080200  | -3.10342700 | 0.59380300  |
| C | 4.15814100  | -0.87705300 | -1.47674600 |
| H | 3.88869000  | 0.00232300  | -2.06726000 |
| H | 4.77609400  | -0.56984400 | -0.62733300 |
| H | 4.71686500  | -1.58424600 | -2.09792200 |
| C | 1.59956400  | -2.06181300 | -2.28253400 |
| H | 2.14783700  | -2.69552000 | -2.98625000 |
| H | 0.70463000  | -2.58525300 | -1.93198800 |
| H | 1.31085600  | -1.13059900 | -2.77759900 |
| O | -0.62215600 | -0.65482200 | 1.35572900  |
| O | 0.33543100  | -2.73884300 | 1.02525300  |
| C | -1.45822500 | -1.62058500 | 2.05762900  |
| C | -1.06920600 | -2.95842100 | 1.34498600  |
| C | -2.91328800 | -1.21756800 | 1.89458300  |
| H | -3.56927600 | -1.98767000 | 2.31499600  |
| H | -3.09874900 | -0.28119100 | 2.43022200  |
| H | -3.17245400 | -1.07169100 | 0.84322400  |
| C | -1.05554800 | -1.59713600 | 3.53045900  |
| H | -1.18051800 | -0.57903800 | 3.91235600  |
| H | -1.68107200 | -2.26992400 | 4.12547700  |
| H | -0.00595100 | -1.88382900 | 3.65493600  |
| C | -1.19117200 | -4.19925700 | 2.21315200  |
| H | -2.22604700 | -4.32652100 | 2.54947500  |
| H | -0.91095300 | -5.08494900 | 1.63354500  |
| H | -0.54209400 | -4.13849700 | 3.08958100  |
| C | -1.80581300 | -3.16007400 | 0.02213100  |
| H | -1.34248500 | -3.99392200 | -0.51516700 |
| H | -2.86145400 | -3.40008400 | 0.18425500  |
| H | -1.74087400 | -2.26410400 | -0.60432200 |
| B | 0.52835000  | -1.34443200 | 0.97439300  |
| H | 2.88647800  | -1.65003000 | 1.98748400  |

TS<sub>S17/S19Z</sub>

|   |             |             |             |
|---|-------------|-------------|-------------|
| C | 1.58854500  | -0.20370500 | 1.87899100  |
| C | 1.26886300  | -0.36592400 | 0.51826700  |
| C | 1.35491500  | 0.78809600  | -0.45230600 |
| C | 1.60747700  | 0.62767000  | -1.81944500 |
| C | 0.99604800  | 2.06546300  | 0.00105800  |
| C | 1.53524200  | 1.70557000  | -2.69706000 |
| H | 1.86161000  | -0.35337200 | -2.20864300 |
| C | 0.92325900  | 3.14362600  | -0.87405300 |
| H | 0.77009600  | 2.20456000  | 1.05370500  |
| C | 1.19797400  | 2.97286400  | -2.22900500 |
| H | 1.74440400  | 1.55071400  | -3.75223500 |
| H | 0.65076200  | 4.12400900  | -0.49215900 |
| H | 1.14639500  | 3.81610100  | -2.91223700 |
| C | 2.60537000  | 0.66154800  | 2.38149900  |
| O | 3.38294500  | 1.38171000  | 1.75102800  |
| O | 2.65240100  | 0.61698300  | 3.76509500  |
| C | 3.64736200  | 1.45487700  | 4.37207700  |
| H | 3.47547700  | 2.50919700  | 4.13159400  |
| H | 3.55002800  | 1.29642900  | 5.44765600  |
| H | 4.65317400  | 1.17498400  | 4.04152700  |
| P | 2.78331200  | -1.95464200 | -0.25556900 |
| C | 2.39569500  | -3.36365500 | 0.85070200  |
| H | 1.54662000  | -3.91981800 | 0.44119900  |
| H | 3.25906400  | -4.03235800 | 0.92941800  |
| H | 2.13727500  | -2.99366000 | 1.84802100  |
| C | 4.43948700  | -1.40350400 | 0.29994600  |
| H | 4.80655400  | -0.61663200 | -0.36556900 |
| H | 4.37453100  | -1.00157700 | 1.31381500  |
| H | 5.13455800  | -2.25046100 | 0.28547200  |
| C | 3.14009100  | -2.80191900 | -1.86170900 |
| H | 3.84842300  | -3.62490400 | -1.70838100 |
| H | 2.20828900  | -3.19694700 | -2.27715300 |
| H | 3.57037200  | -2.08635700 | -2.56892800 |
| O | -1.13890800 | -1.17249700 | 1.01135300  |
| O | -0.18289200 | -1.99305800 | -0.90463700 |
| C | -2.08808200 | -2.16586400 | 0.48244200  |
| C | -1.61337600 | -2.31678500 | -1.00366900 |
| C | -3.49794200 | -1.62965200 | 0.64526800  |
| H | -4.21280300 | -2.30804000 | 0.16747600  |
| H | -3.74578200 | -1.56618400 | 1.70914900  |
| H | -3.60587400 | -0.63700500 | 0.20296400  |
| C | -1.89658700 | -3.43170700 | 1.31008700  |
| H | -2.06466200 | -3.19309700 | 2.36451900  |
| H | -2.61126400 | -4.20504200 | 1.01279900  |

|   |             |             |             |
|---|-------------|-------------|-------------|
| H | -0.88266200 | -3.82948100 | 1.20302800  |
| C | -1.75821400 | -3.71258100 | -1.58045600 |
| H | -2.81200600 | -4.01060200 | -1.58351100 |
| H | -1.39799000 | -3.72065000 | -2.61374600 |
| H | -1.18797900 | -4.44662300 | -1.00662300 |
| C | -2.22243500 | -1.27811500 | -1.93965200 |
| H | -1.70481500 | -1.32428100 | -2.90262800 |
| H | -3.28523800 | -1.47532700 | -2.10840600 |
| H | -2.11071600 | -0.26627800 | -1.53640800 |
| B | -0.02820300 | -1.20900200 | 0.21101300  |
| H | 1.10077500  | -0.84474400 | 2.60726900  |

**TS<sub>S21E/S18</sub>**

|   |             |             |             |
|---|-------------|-------------|-------------|
| O | 1.51877500  | -0.57209100 | -0.97444600 |
| O | 1.83257800  | 0.21617800  | 1.17460100  |
| C | 1.95998800  | -1.71785800 | -0.17887900 |
| C | 2.60992400  | -1.02006600 | 1.06768600  |
| C | 2.92397500  | -2.54030000 | -1.01755000 |
| H | 3.35931600  | -3.34204200 | -0.41134400 |
| H | 2.38150100  | -2.99916000 | -1.85029800 |
| H | 3.73166400  | -1.92759700 | -1.42417000 |
| C | 0.73855000  | -2.55137600 | 0.18604800  |
| H | 0.20196200  | -2.82064100 | -0.72840900 |
| H | 1.03728300  | -3.46960800 | 0.70199800  |
| H | 0.04934800  | -1.99075000 | 0.82137600  |
| C | 2.49300100  | -1.79736000 | 2.36652200  |
| H | 3.01336100  | -2.75719800 | 2.27905000  |
| H | 2.96085300  | -1.22926700 | 3.17702300  |
| H | 1.45125100  | -1.98895300 | 2.63177800  |
| C | 4.05942000  | -0.60465300 | 0.82796500  |
| H | 4.38686000  | 0.03262800  | 1.65517700  |
| H | 4.71893700  | -1.47690800 | 0.78281400  |
| H | 4.15990800  | -0.04014000 | -0.10474400 |
| B | 1.34011100  | 0.47763300  | -0.09475800 |
| H | -1.79719500 | 2.13728100  | -1.69851300 |
| C | -0.99519200 | 1.74575800  | -1.07134500 |
| C | -1.21939400 | 0.64993000  | -0.09658200 |
| C | -1.84036000 | -0.56718700 | -0.60977800 |
| C | -1.68347900 | -0.90043500 | -1.97735300 |
| C | -2.59915400 | -1.47857900 | 0.16252300  |
| C | -2.20565800 | -2.06826900 | -2.51474800 |
| H | -1.11516400 | -0.22616900 | -2.61122000 |
| C | -3.11500100 | -2.65031600 | -0.37817200 |
| H | -2.79930800 | -1.28152100 | 1.21092200  |
| C | -2.92267500 | -2.96697300 | -1.72248400 |

|   |             |             |             |
|---|-------------|-------------|-------------|
| H | -2.04720400 | -2.28275100 | -3.56955400 |
| H | -3.68685400 | -3.31938800 | 0.26110700  |
| H | -3.33165900 | -3.88056600 | -2.14393200 |
| C | 0.22962100  | 2.26735600  | -1.22543700 |
| O | 1.30391900  | 1.81602100  | -0.53388000 |
| O | 0.47627900  | 3.35945500  | -1.98598800 |
| C | 1.73045000  | 3.35175700  | -2.70323600 |
| H | 1.82121700  | 2.44074000  | -3.30647900 |
| H | 1.70037900  | 4.22595700  | -3.35502300 |
| H | 2.57834300  | 3.42744500  | -2.01668000 |
| P | -1.60003200 | 1.21044500  | 1.52228500  |
| C | -1.04780800 | 0.11188600  | 2.87051600  |
| H | 0.04111800  | 0.03393300  | 2.81364500  |
| H | -1.34147900 | 0.55656600  | 3.82699300  |
| H | -1.48163400 | -0.88676400 | 2.79437300  |
| C | -3.36549800 | 1.57695700  | 1.88350100  |
| H | -3.70704900 | 2.34983000  | 1.18731100  |
| H | -3.97720700 | 0.68153000  | 1.74405100  |
| H | -3.47739300 | 1.93630600  | 2.91198000  |
| C | -0.75423600 | 2.78248200  | 1.85334800  |
| H | -1.08976100 | 3.54212600  | 1.14303200  |
| H | -1.00169600 | 3.09726800  | 2.87198700  |
| H | 0.32717600  | 2.65358300  | 1.76193300  |

**TS<sub>S18/S19E</sub>**

|   |            |             |             |
|---|------------|-------------|-------------|
| O | 1.30590100 | -1.13542700 | -1.26030900 |
| O | 1.13684300 | -0.55980300 | 0.97788400  |
| C | 1.98347000 | -2.17441800 | -0.51599200 |
| C | 2.23498100 | -1.49963700 | 0.88014600  |
| C | 3.25384200 | -2.56772100 | -1.25984800 |
| H | 3.83108700 | -3.29649800 | -0.67944500 |
| H | 2.98863200 | -3.03021800 | -2.21643200 |
| H | 3.88545600 | -1.69949900 | -1.46143600 |
| C | 1.04900400 | -3.38301200 | -0.44065500 |
| H | 0.77440100 | -3.67532900 | -1.45946000 |
| H | 1.53487700 | -4.23695400 | 0.04309800  |
| H | 0.13103900 | -3.14539600 | 0.10326700  |
| C | 2.16090300 | -2.45122700 | 2.06556600  |
| H | 2.92230600 | -3.23398700 | 1.97702800  |
| H | 2.34852300 | -1.89769900 | 2.99182400  |
| H | 1.17819800 | -2.92331600 | 2.13861600  |
| C | 3.54896700 | -0.71634600 | 0.93562500  |
| H | 3.56062000 | -0.11782900 | 1.85268500  |
| H | 4.41253500 | -1.38934900 | 0.95414400  |
| H | 3.64734300 | -0.04020600 | 0.08293900  |

|                             |             |             |             |
|-----------------------------|-------------|-------------|-------------|
| B                           | 0.80311700  | -0.15969300 | -0.34217900 |
| H                           | -1.28271600 | 2.20194500  | -1.91765400 |
| C                           | -0.51870900 | 1.60207100  | -1.43641600 |
| C                           | -0.67121700 | 0.43633500  | -0.70099900 |
| C                           | -1.89271500 | -0.38769400 | -0.74518900 |
| C                           | -2.07806800 | -1.42258500 | 0.18588600  |
| C                           | -2.87551400 | -0.19377000 | -1.72520400 |
| C                           | -3.20724200 | -2.22756600 | 0.14433200  |
| H                           | -1.32842000 | -1.56623800 | 0.95951800  |
| C                           | -4.01007300 | -1.00094100 | -1.76702800 |
| H                           | -2.74544100 | 0.58312900  | -2.47287600 |
| C                           | -4.18249300 | -2.01803300 | -0.83290300 |
| H                           | -3.33276200 | -3.02069000 | 0.87663700  |
| H                           | -4.75964700 | -0.83492200 | -2.53611300 |
| H                           | -5.06837100 | -2.64628700 | -0.86531800 |
| C                           | 0.82875100  | 2.02182400  | -1.36247800 |
| O                           | 1.66118500  | 1.28881000  | -0.73724800 |
| O                           | 1.20519200  | 3.16567800  | -1.92213400 |
| C                           | 2.60522000  | 3.52240300  | -1.79240100 |
| H                           | 3.23381500  | 2.75988400  | -2.25902500 |
| H                           | 2.70605600  | 4.47454000  | -2.31217500 |
| H                           | 2.86978400  | 3.62957200  | -0.73725200 |
| P                           | -1.13762800 | 1.43960500  | 1.65716000  |
| C                           | -1.27307700 | 0.83954900  | 3.40150200  |
| H                           | -1.99327000 | 0.01571200  | 3.44327900  |
| H                           | -0.29818400 | 0.46344900  | 3.72724400  |
| H                           | -1.60052600 | 1.63755200  | 4.07869900  |
| C                           | -2.78776900 | 2.21419400  | 1.38413300  |
| H                           | -2.80834900 | 2.68315700  | 0.39409100  |
| H                           | -3.56115300 | 1.43901600  | 1.41114700  |
| H                           | -3.00978500 | 2.97228400  | 2.14370000  |
| C                           | -0.04657700 | 2.91494300  | 1.83298000  |
| H                           | 0.95024700  | 2.59479900  | 2.15186000  |
| H                           | 0.04390800  | 3.42054100  | 0.86514700  |
| H                           | -0.45359600 | 3.62426400  | 2.56282400  |
| <b>TS<sub>S13/S20</sub></b> |             |             |             |
| C                           | 1.18424100  | -0.77950000 | 1.31183200  |
| C                           | 2.01302400  | -0.39906700 | 0.33744300  |
| C                           | 2.11145800  | 0.95706100  | -0.28330300 |
| C                           | 1.01605900  | 1.48412200  | -0.97886500 |
| C                           | 3.26921300  | 1.73352200  | -0.15231900 |
| C                           | 1.08055800  | 2.76118700  | -1.52874100 |
| H                           | 0.11343300  | 0.88452900  | -1.07347300 |
| C                           | 3.32928000  | 3.01191000  | -0.70186800 |

|   |             |             |             |
|---|-------------|-------------|-------------|
| H | 4.11752800  | 1.34653900  | 0.40656900  |
| C | 2.23693300  | 3.52806600  | -1.39533400 |
| H | 0.22346800  | 3.15864900  | -2.06651800 |
| H | 4.22943400  | 3.60867500  | -0.58089400 |
| H | 2.28485900  | 4.52470900  | -1.82529900 |
| C | 0.23207200  | 0.02349400  | 1.97295300  |
| O | -0.99590100 | 0.06243200  | 1.72932800  |
| O | 0.73059300  | 0.68875000  | 3.05537900  |
| C | -0.24059200 | 1.33884600  | 3.90275200  |
| H | -0.95318400 | 0.61238400  | 4.30473300  |
| H | 0.33825800  | 1.78668700  | 4.71169500  |
| H | -0.78247500 | 2.11366600  | 3.35260800  |
| P | 2.99016500  | -1.70240600 | -0.44191600 |
| C | 2.79623100  | -3.25664700 | 0.45376800  |
| H | 3.16138400  | -3.13410700 | 1.47685600  |
| H | 1.73799500  | -3.52709900 | 0.48174900  |
| H | 3.37315400  | -4.03164900 | -0.06107400 |
| C | 4.76572600  | -1.33799800 | -0.55792400 |
| H | 4.92122000  | -0.44896900 | -1.17548600 |
| H | 5.17032100  | -1.16414500 | 0.44346700  |
| H | 5.27500900  | -2.19061500 | -1.01853800 |
| C | 2.39763700  | -1.93591800 | -2.14092900 |
| H | 1.34197500  | -2.22341100 | -2.11223500 |
| H | 2.49894300  | -0.99253500 | -2.68677700 |
| H | 2.98341100  | -2.71299500 | -2.64141800 |
| O | -3.18193800 | -1.21307500 | 0.86987100  |
| O | -1.82659200 | -0.49277100 | -0.85181300 |
| C | -4.05988500 | -0.61635100 | -0.12557300 |
| C | -3.07308400 | 0.25274400  | -0.97699300 |
| C | -5.15198500 | 0.17060800  | 0.58158000  |
| H | -5.77856400 | 0.69535000  | -0.14825000 |
| H | -5.79081000 | -0.51663300 | 1.14566600  |
| H | -4.73406800 | 0.90274300  | 1.27631500  |
| C | -4.67649500 | -1.76602300 | -0.92252700 |
| H | -5.19478300 | -2.43577100 | -0.22904200 |
| H | -5.40246400 | -1.40244400 | -1.65709600 |
| H | -3.90422300 | -2.34050500 | -1.44400700 |
| C | -3.42552600 | 0.35517400  | -2.45265600 |
| H | -4.40993400 | 0.81901600  | -2.57877400 |
| H | -2.68606500 | 0.98286100  | -2.96137300 |
| H | -3.43517600 | -0.62570100 | -2.93329700 |
| C | -2.86246800 | 1.65050600  | -0.39638500 |
| H | -2.03171500 | 2.13156900  | -0.92267700 |
| H | -3.75572600 | 2.26858000  | -0.53282700 |



|                              |             |             |             |
|------------------------------|-------------|-------------|-------------|
| H                            | -2.61377500 | 1.60542100  | 0.66628000  |
| B                            | -1.88190000 | -1.19037900 | 0.35776700  |
| H                            | -1.10305800 | -2.07410100 | 0.57518500  |
| <b>TS<sub>s20/s21z</sub></b> |             |             |             |
| O                            | -2.08301500 | -0.12106300 | 0.63197300  |
| O                            | -2.65938700 | -0.63845800 | -1.57160700 |
| C                            | -3.12034800 | -1.12147700 | 0.67806100  |
| C                            | -3.78954900 | -0.96698400 | -0.72869400 |
| C                            | -4.03904500 | -0.82436300 | 1.85420800  |
| H                            | -4.89573200 | -1.50762600 | 1.85861200  |
| H                            | -3.48999200 | -0.96276700 | 2.79199800  |
| H                            | -4.40954000 | 0.20298800  | 1.82107900  |
| C                            | -2.46751000 | -2.49385900 | 0.86221900  |
| H                            | -1.87137400 | -2.48159500 | 1.78058800  |
| H                            | -3.21641300 | -3.28742000 | 0.95382700  |
| H                            | -1.80550900 | -2.73017800 | 0.02287200  |
| C                            | -4.45551200 | -2.22750300 | -1.25906100 |
| H                            | -5.24543900 | -2.56237000 | -0.57724600 |
| H                            | -4.91247000 | -2.02169200 | -2.23286300 |
| H                            | -3.73261700 | -3.03746200 | -1.38305900 |
| C                            | -4.77211900 | 0.20529300  | -0.77625400 |
| H                            | -5.04421300 | 0.39557800  | -1.81947500 |
| H                            | -5.68780900 | -0.01405700 | -0.21674400 |
| H                            | -4.31670000 | 1.11250500  | -0.36660700 |
| B                            | -1.67757500 | 0.00035600  | -0.75082600 |
| H                            | -0.45543900 | -0.45136800 | -0.93853100 |
| C                            | 0.75108500  | 0.70786400  | -0.71796000 |
| C                            | 1.81075100  | 0.33786200  | 0.03957900  |
| C                            | 2.94618000  | -0.43586400 | -0.50318000 |
| C                            | 3.74642600  | -1.29459400 | 0.26763100  |
| C                            | 3.24481700  | -0.32658900 | -1.87397700 |
| C                            | 4.80462400  | -1.99922900 | -0.30150100 |
| H                            | 3.54153000  | -1.44759900 | 1.32271000  |
| C                            | 4.29528300  | -1.03348600 | -2.44079700 |
| H                            | 2.63200400  | 0.33111300  | -2.48479900 |
| C                            | 5.08858000  | -1.87410200 | -1.65774500 |
| H                            | 5.40176800  | -2.65916000 | 0.32219700  |
| H                            | 4.50320500  | -0.92356700 | -3.50207000 |
| H                            | 5.91292500  | -2.42508200 | -2.10120100 |
| C                            | -0.15253200 | 1.69774000  | -0.93380300 |
| O                            | -1.42786600 | 1.45063400  | -1.13380400 |
| O                            | 0.26857700  | 2.97375400  | -1.03402200 |
| C                            | -0.70759100 | 3.94827600  | -1.46722200 |
| H                            | -1.54549800 | 3.99595800  | -0.76608600 |

|   |             |             |             |
|---|-------------|-------------|-------------|
| H | -0.17047900 | 4.89720200  | -1.48103600 |
| H | -1.07594400 | 3.70907700  | -2.46887900 |
| P | 1.65307400  | 0.62664200  | 1.80427400  |
| C | 3.19335800  | 1.20398400  | 2.58151400  |
| H | 3.97961900  | 0.44926700  | 2.51648600  |
| H | 3.52278600  | 2.11265700  | 2.06852600  |
| H | 2.99404700  | 1.42862800  | 3.63418200  |
| C | 1.05123900  | -0.82189800 | 2.73093700  |
| H | 0.08129000  | -1.09978000 | 2.30487500  |
| H | 1.73900600  | -1.66626800 | 2.64612600  |
| H | 0.92682800  | -0.55451800 | 3.78558500  |
| C | 0.41474700  | 1.90899300  | 2.11082700  |
| H | 0.69317700  | 2.83334300  | 1.59887100  |
| H | -0.56200400 | 1.56335200  | 1.75931800  |
| H | 0.37414600  | 2.08086500  | 3.19144000  |

**TS<sub>s21z/s22</sub>**

|   |             |             |             |
|---|-------------|-------------|-------------|
| O | 3.51777400  | -0.91210200 | -0.78240300 |
| O | 2.33988700  | 0.62729800  | 0.47138800  |
| C | 4.48582300  | 0.09341400  | -0.34423800 |
| C | 3.55982600  | 1.30315600  | 0.02346100  |
| C | 5.46438300  | 0.36568800  | -1.47218900 |
| H | 6.13154700  | 1.18964100  | -1.19772300 |
| H | 6.07581500  | -0.52413600 | -1.65134400 |
| H | 4.94850000  | 0.62526100  | -2.39931200 |
| C | 5.21114800  | -0.48595500 | 0.86713800  |
| H | 5.66818500  | -1.43839800 | 0.58230700  |
| H | 6.00184900  | 0.18600200  | 1.21477900  |
| H | 4.51713500  | -0.66812100 | 1.69448200  |
| C | 4.07632800  | 2.18120500  | 1.14880700  |
| H | 5.04405400  | 2.61383200  | 0.87364800  |
| H | 3.37347500  | 3.00108700  | 1.32651400  |
| H | 4.19444500  | 1.61735000  | 2.07668300  |
| C | 3.17632100  | 2.15023200  | -1.18602400 |
| H | 2.37966500  | 2.84113900  | -0.89345200 |
| H | 4.02778500  | 2.73720800  | -1.54354800 |
| H | 2.80959700  | 1.52612100  | -2.00756300 |
| B | 2.32865700  | -0.60754000 | -0.14735000 |
| H | -0.04169000 | 0.96319400  | -0.10407000 |
| C | -0.60400400 | 0.04117800  | 0.07139700  |
| C | -1.96799400 | -0.02572800 | -0.06197900 |
| C | -2.91834100 | 1.08832500  | 0.04996800  |
| C | -4.04375400 | 1.02103500  | 0.88485400  |
| C | -2.71193900 | 2.26349900  | -0.69274300 |
| C | -4.94073900 | 2.08231900  | 0.96143800  |

|   |             |             |             |
|---|-------------|-------------|-------------|
| H | -4.20545300 | 0.13457800  | 1.49287500  |
| C | -3.60431100 | 3.32519900  | -0.60655900 |
| H | -1.84840800 | 2.33194200  | -1.34969600 |
| C | -4.72812500 | 3.23958600  | 0.21596100  |
| H | -5.80500600 | 2.00742700  | 1.61631300  |
| H | -3.42741000 | 4.22287100  | -1.19333400 |
| H | -5.42760600 | 4.06840000  | 0.27722100  |
| C | -0.02840300 | -1.24536100 | 0.31967100  |
| O | 1.29551000  | -1.48773900 | -0.17781200 |
| O | -0.17227300 | -1.81183600 | 1.59499700  |
| C | 0.53512300  | -1.11745300 | 2.64242000  |
| H | 0.21134600  | -0.06978300 | 2.69802000  |
| H | 0.29415100  | -1.63104200 | 3.57736600  |
| H | 1.62063200  | -1.15339600 | 2.48362200  |
| P | -2.36684600 | -1.73667600 | -0.48527400 |
| C | -1.55132900 | -2.21596200 | -2.05389200 |
| H | -2.31041100 | -2.44122700 | -2.81140900 |
| H | -0.92181000 | -1.39310300 | -2.39650500 |
| H | -0.92732800 | -3.09693100 | -1.88743400 |
| C | -4.15192800 | -1.63602100 | -0.98763500 |
| H | -4.80759200 | -1.52288800 | -0.12008200 |
| H | -4.30609800 | -0.78389800 | -1.65774300 |
| H | -4.42522100 | -2.55807500 | -1.51023500 |
| C | -2.50245900 | -3.22249900 | 0.59849800  |
| H | -1.51237000 | -3.62593800 | 0.81246700  |
| H | -2.98144000 | -2.93721700 | 1.54048100  |
| H | -3.12619200 | -3.96784400 | 0.09222000  |

**TS<sub>S22/S21E</sub>**

|   |             |             |             |
|---|-------------|-------------|-------------|
| O | -1.64997900 | 0.31235100  | -0.66601300 |
| O | -2.68160000 | -0.62999500 | 1.17130700  |
| C | -2.80410100 | 1.15974300  | -0.36039700 |
| C | -3.11726300 | 0.76536700  | 1.12435800  |
| C | -3.91505900 | 0.76525000  | -1.32871100 |
| H | -4.79438300 | 1.40393100  | -1.20134700 |
| H | -3.54874600 | 0.88169800  | -2.35323400 |
| H | -4.21418400 | -0.27799800 | -1.18338900 |
| C | -2.40575500 | 2.61052400  | -0.56294900 |
| H | -2.21161500 | 2.79224400  | -1.62469100 |
| H | -3.21732100 | 3.27395100  | -0.24542100 |
| H | -1.50379900 | 2.86133700  | 0.00069000  |
| C | -2.26398100 | 1.52961700  | 2.13319700  |
| H | -2.57246900 | 2.57744700  | 2.20016700  |
| H | -2.38564500 | 1.06980200  | 3.11865100  |
| H | -1.20331000 | 1.49352400  | 1.86222200  |

|                             |             |             |             |
|-----------------------------|-------------|-------------|-------------|
| C                           | -4.58513300 | 0.84087700  | 1.50311800  |
| H                           | -4.70890500 | 0.55918300  | 2.55349900  |
| H                           | -4.95246500 | 1.86514200  | 1.37882200  |
| H                           | -5.19302100 | 0.17215500  | 0.88989000  |
| B                           | -1.72087200 | -0.77158800 | 0.18568600  |
| H                           | 0.59205500  | -0.59212900 | -2.37981800 |
| C                           | 0.73078200  | -0.93098500 | -1.34762100 |
| C                           | 1.60039400  | -0.32954800 | -0.48105000 |
| C                           | 2.08587700  | 1.05485600  | -0.55143800 |
| C                           | 2.72206200  | 1.52363700  | -1.71240600 |
| C                           | 1.91019800  | 1.94730900  | 0.51673500  |
| C                           | 3.16845800  | 2.83746700  | -1.79680200 |
| H                           | 2.87080500  | 0.84358800  | -2.54754600 |
| C                           | 2.36635900  | 3.25931300  | 0.43278100  |
| H                           | 1.39312500  | 1.61187000  | 1.41244900  |
| C                           | 2.99796300  | 3.71227000  | -0.72345500 |
| H                           | 3.66075400  | 3.17923300  | -2.70357600 |
| H                           | 2.21710100  | 3.93392500  | 1.27191500  |
| H                           | 3.35189700  | 4.73714200  | -0.78984100 |
| C                           | 0.12557800  | -2.10334300 | -0.78391300 |
| O                           | -0.96295200 | -1.89697800 | 0.14566800  |
| O                           | -0.21170600 | -3.12183100 | -1.67841500 |
| C                           | -1.42859100 | -2.90068900 | -2.42255500 |
| H                           | -1.41172100 | -1.91998000 | -2.91755900 |
| H                           | -1.48658400 | -3.68971200 | -3.17633000 |
| H                           | -2.30796600 | -2.95783100 | -1.76938000 |
| P                           | 2.01866300  | -1.56463900 | 0.77646900  |
| C                           | 3.37834100  | -0.71875300 | 1.71790200  |
| H                           | 4.09715600  | -0.27207100 | 1.02299500  |
| H                           | 2.98347500  | 0.06829700  | 2.36647000  |
| H                           | 3.89315100  | -1.45609400 | 2.34200300  |
| C                           | 2.89908700  | -2.98453600 | 0.02732600  |
| H                           | 2.85749300  | -2.89875600 | -1.05954400 |
| H                           | 3.94251400  | -2.99612800 | 0.36138800  |
| H                           | 2.40798800  | -3.91273500 | 0.32997300  |
| C                           | 1.04599900  | -2.13975500 | 2.23724000  |
| H                           | 0.48513000  | -1.29453100 | 2.65006800  |
| H                           | 0.34117000  | -2.91711700 | 1.94129000  |
| H                           | 1.74068900  | -2.51161000 | 2.99824200  |
| <b>TS<sub>S22/S23</sub></b> |             |             |             |
| O                           | 0.51417500  | -2.52676300 | -1.03351600 |
| O                           | 1.02259500  | -1.34029300 | 0.87738900  |
| C                           | 1.96835200  | -2.62209600 | -0.86388200 |
| C                           | 2.14522500  | -2.26109500 | 0.64999900  |

|   |             |             |             |
|---|-------------|-------------|-------------|
| C | 2.41970200  | -4.02120800 | -1.23952500 |
| H | 3.48689400  | -4.13998000 | -1.02434800 |
| H | 2.26824500  | -4.18042100 | -2.31156100 |
| H | 1.86369700  | -4.78527800 | -0.69184500 |
| C | 2.58710900  | -1.58579700 | -1.79668000 |
| H | 2.25414300  | -1.78786500 | -2.81920800 |
| H | 3.67977900  | -1.63776000 | -1.77256800 |
| H | 2.27536400  | -0.57135200 | -1.52459500 |
| C | 3.44347100  | -1.55134000 | 0.98636200  |
| H | 4.29405300  | -2.20324400 | 0.76010200  |
| H | 3.46708400  | -1.31708600 | 2.05511900  |
| H | 3.55550600  | -0.62281600 | 0.42346900  |
| C | 1.93085400  | -3.45177900 | 1.57885300  |
| H | 1.87108900  | -3.08909600 | 2.60960300  |
| H | 2.76324100  | -4.15890800 | 1.51074600  |
| H | 1.00158700  | -3.98100300 | 1.34322400  |
| B | 0.07498700  | -1.65373700 | -0.06498800 |
| H | -0.47656200 | 1.28897000  | 1.69028800  |
| C | -0.73688900 | 1.04677500  | 0.64831500  |
| C | -0.26996800 | 1.68533200  | -0.43264100 |
| C | 0.73924600  | 2.70718700  | -0.27509200 |
| C | 2.03659700  | 2.40095400  | 0.20130700  |
| C | 0.50054900  | 4.05005500  | -0.65207700 |
| C | 3.02663300  | 3.37375900  | 0.29092600  |
| H | 2.25224900  | 1.37612800  | 0.49400000  |
| C | 1.48403100  | 5.02312800  | -0.53159100 |
| H | -0.48064800 | 4.31668100  | -1.04018600 |
| C | 2.76209400  | 4.69596700  | -0.06860100 |
| H | 4.01374600  | 3.09945800  | 0.65808300  |
| H | 1.25830400  | 6.04919500  | -0.81444600 |
| H | 3.53484200  | 5.45579800  | 0.00532600  |
| C | -1.74180200 | -0.06001700 | 0.50727400  |
| O | -1.24523200 | -1.27610300 | -0.06992500 |
| O | -2.47915400 | -0.33542500 | 1.67481600  |
| C | -1.73496400 | -0.94229100 | 2.74659400  |
| H | -0.89244800 | -0.31756400 | 3.06089600  |
| H | -2.44176600 | -1.04679500 | 3.57175600  |
| H | -1.36632500 | -1.93111500 | 2.45176700  |
| P | -3.09307800 | 0.43110700  | -0.72403700 |
| C | -3.70325300 | 2.09417800  | -0.37569300 |
| H | -3.93699500 | 2.17081800  | 0.69066400  |
| H | -2.93274900 | 2.82240900  | -0.63729600 |
| H | -4.61029900 | 2.26700000  | -0.96414500 |
| C | -4.46317400 | -0.73267000 | -0.49061900 |

|   |             |             |             |
|---|-------------|-------------|-------------|
| H | -4.08843600 | -1.75418200 | -0.60476700 |
| H | -4.88946400 | -0.61084000 | 0.50753700  |
| H | -5.22818500 | -0.53822300 | -1.24892000 |
| C | -2.57012900 | 0.28089200  | -2.44648500 |
| H | -3.44483000 | 0.44424900  | -3.08634300 |
| H | -1.78668500 | 1.01554300  | -2.64028700 |
| H | -2.17879600 | -0.72776200 | -2.60707500 |

**TS<sub>S23/S19Z</sub>**

|   |             |             |             |
|---|-------------|-------------|-------------|
| O | 0.98727700  | -1.63752000 | 1.23136400  |
| O | 0.14681500  | -1.10615000 | -0.87131000 |
| C | 1.34094800  | -2.71893600 | 0.34143600  |
| C | 0.33264900  | -2.53804000 | -0.84491300 |
| C | 1.20487200  | -4.03794200 | 1.09180700  |
| H | 1.37351000  | -4.88492200 | 0.41690900  |
| H | 1.95411000  | -4.08515200 | 1.88934900  |
| H | 0.21540500  | -4.13993300 | 1.54375200  |
| C | 2.79424400  | -2.53616500 | -0.10071900 |
| H | 3.42909500  | -2.46068200 | 0.78849900  |
| H | 3.13938600  | -3.38830100 | -0.69603600 |
| H | 2.91676700  | -1.62281100 | -0.69002800 |
| C | 0.86032100  | -2.98732700 | -2.20103100 |
| H | 1.11835900  | -4.05211600 | -2.17960300 |
| H | 0.08679900  | -2.84087100 | -2.96268800 |
| H | 1.74512800  | -2.41802400 | -2.49539200 |
| C | -1.01187800 | -3.22129300 | -0.57590200 |
| H | -1.72059900 | -2.92771000 | -1.35673100 |
| H | -0.91399900 | -4.31167600 | -0.60249600 |
| H | -1.42289100 | -2.92641000 | 0.39294000  |
| B | 0.26791500  | -0.63487500 | 0.49070400  |
| H | -0.46465000 | 2.72909700  | 1.16659900  |
| C | -0.37953600 | 1.65609200  | 1.01206600  |
| C | 0.68571700  | 0.94213000  | 0.60682600  |
| C | 1.97321600  | 1.54399900  | 0.25646600  |
| C | 3.17127800  | 0.90393200  | 0.60976100  |
| C | 2.04952100  | 2.76608500  | -0.43284900 |
| C | 4.40156600  | 1.47088300  | 0.29487000  |
| H | 3.12139600  | -0.03473900 | 1.15169400  |
| C | 3.28016000  | 3.32497100  | -0.75819700 |
| H | 1.13177000  | 3.26722300  | -0.72898400 |
| C | 4.46225900  | 2.68077200  | -0.39440600 |
| H | 5.31812500  | 0.96481100  | 0.58676100  |
| H | 3.31866400  | 4.26572200  | -1.30117100 |
| H | 5.42367000  | 3.11845500  | -0.64870600 |
| C | -1.51980900 | 0.75734300  | 1.24375700  |

|   |             |             |             |
|---|-------------|-------------|-------------|
| O | -1.21492200 | -0.50424600 | 1.15953400  |
| O | -2.42748900 | 1.16418800  | 2.16021500  |
| C | -3.47460000 | 0.22209300  | 2.45657000  |
| H | -3.06431400 | -0.69386100 | 2.88972500  |
| H | -4.13164200 | 0.72186900  | 3.16863500  |
| H | -4.02957900 | -0.02171400 | 1.54158300  |
| P | -2.69233900 | 1.21404000  | -0.78220900 |
| C | -3.96031300 | 2.53662700  | -0.67756300 |
| H | -4.76578100 | 2.21751900  | -0.00875200 |
| H | -3.50385800 | 3.44290600  | -0.26722300 |
| H | -4.37696200 | 2.75743000  | -1.66690700 |
| C | -3.54687800 | -0.19217700 | -1.59522200 |
| H | -4.33369700 | -0.58504700 | -0.94472500 |
| H | -3.98541000 | 0.12825500  | -2.54735000 |
| H | -2.81595600 | -0.98371200 | -1.78293100 |
| C | -1.52368400 | 1.79772200  | -2.06545500 |
| H | -2.03181900 | 1.89352700  | -3.03160600 |
| H | -1.11318100 | 2.76807700  | -1.77157500 |
| H | -0.70178400 | 1.07895100  | -2.14899000 |

**11. DFT-optimized cartesian coordinates of all species involved in the Fe(II) complex mediated C-H borylation reaction.**

**PEt<sub>3</sub>**

|   |                     |                     |                     |
|---|---------------------|---------------------|---------------------|
| P | -0.5483870000000000 | 0.2100590000000000  | -1.3727580000000000 |
| C | 1.1494930000000000  | -0.0630580000000000 | -2.0813480000000000 |
| H | 1.7140290000000000  | -0.6354380000000000 | -1.3264140000000000 |
| H | 1.0738910000000000  | -0.7088630000000000 | -2.9747040000000000 |
| C | 1.8854510000000000  | 1.2296140000000000  | -2.4036780000000000 |
| H | 2.9020630000000000  | 1.0271880000000000  | -2.7752480000000000 |
| H | 1.3662340000000000  | 1.8143630000000000  | -3.1792330000000000 |
| H | 1.9742540000000000  | 1.8704700000000000  | -1.5126650000000000 |
| C | -1.0771020000000000 | -1.5590720000000000 | -1.1492860000000000 |
| H | -0.8405390000000000 | -2.1303980000000000 | -2.0649800000000000 |
| H | -2.1763490000000000 | -1.5471510000000000 | -1.0612990000000000 |
| C | -0.4693820000000000 | -2.2213070000000000 | 0.0790250000000000  |
| H | -0.7136550000000000 | -1.6617890000000000 | 0.9954280000000000  |
| H | -0.8429170000000000 | -3.2497290000000000 | 0.2029810000000000  |
| H | 0.6283840000000000  | -2.2799530000000000 | 0.0120260000000000  |
| C | -1.4732050000000000 | 0.6128970000000000  | -2.9354880000000000 |
| H | -0.9885350000000000 | 1.5064530000000000  | -3.3631500000000000 |
| H | -1.3302150000000000 | -0.2033160000000000 | -3.6663970000000000 |
| C | -2.9527370000000000 | 0.8887290000000000  | -2.7085100000000000 |
| H | -3.4542560000000000 | 1.1695630000000000  | -3.6477410000000000 |
| H | -3.4778810000000000 | 0.0060710000000000  | -2.3108150000000000 |
| H | -3.0993550000000000 | 1.7102250000000000  | -1.9900490000000000 |

**C<sub>6</sub>H<sub>6</sub>**

|   |                    |                     |                     |
|---|--------------------|---------------------|---------------------|
| C | 2.7963220000000000 | -2.0666540000000000 | -0.3246150000000000 |
| C | 2.7210910000000000 | -0.6759120000000000 | -0.2465890000000000 |
| C | 3.4378900000000000 | 0.0074560000000000  | 0.7361680000000000  |
| C | 4.2302460000000000 | -0.6998580000000000 | 1.6405220000000000  |
| C | 4.3057040000000000 | -2.0908490000000000 | 1.5623090000000000  |
| C | 3.5888410000000000 | -2.7741310000000000 | 0.5798510000000000  |
| H | 2.2352340000000000 | -2.6022040000000000 | -1.0944960000000000 |
| H | 2.1005250000000000 | -0.1212290000000000 | -0.9548830000000000 |
| H | 3.3788360000000000 | 1.0970530000000000  | 0.7967200000000000  |
| H | 4.7918150000000000 | -0.1645850000000000 | 2.4102530000000000  |
| H | 4.9263670000000000 | -2.6452680000000000 | 2.2706690000000000  |
| H | 3.6480860000000000 | -3.8636980000000000 | 0.5186660000000000  |

**Ph-Bpin**

|   |                    |                     |                     |
|---|--------------------|---------------------|---------------------|
| B | 1.7984360000000000 | -1.6512490000000000 | -0.1529720000000000 |
| O | 2.8314770000000000 | -2.2705050000000000 | 0.4937360000000000  |
| O | 2.2202180000000000 | -0.7488100000000000 | -1.0892560000000000 |
| C | 4.0413960000000000 | -1.5833650000000000 | 0.1237090000000000  |



|              |                    |                    |                    |
|--------------|--------------------|--------------------|--------------------|
| C            | 3.640802000000000  | -0.924980000000000 | -1.243790000000000 |
| C            | 4.320209000000000  | -0.557692000000000 | 1.215808000000000  |
| C            | 5.174957000000000  | -2.586768000000000 | 0.040269000000000  |
| C            | 3.844710000000000  | -1.856865000000000 | -2.432301000000000 |
| C            | 4.280295000000000  | 0.422997000000000  | -1.513776000000000 |
| H            | 3.514443000000000  | 0.188506000000000  | 1.276006000000000  |
| H            | 4.375714000000000  | -1.076917000000000 | 2.183307000000000  |
| H            | 5.271854000000000  | -0.033625000000000 | 1.048317000000000  |
| H            | 6.095015000000000  | -2.105314000000000 | -0.323522000000000 |
| H            | 5.378005000000000  | -2.998148000000000 | 1.039617000000000  |
| H            | 4.926694000000000  | -3.422378000000000 | -0.626241000000000 |
| H            | 3.401459000000000  | -2.845544000000000 | -2.243271000000000 |
| H            | 3.346520000000000  | -1.423464000000000 | -3.311335000000000 |
| H            | 4.910224000000000  | -1.989537000000000 | -2.667668000000000 |
| H            | 3.937488000000000  | 0.806235000000000  | -2.485791000000000 |
| H            | 4.011187000000000  | 1.158696000000000  | -0.745376000000000 |
| H            | 5.376385000000000  | 0.333933000000000  | -1.549675000000000 |
| C            | -0.712870000000000 | -1.331052000000000 | -0.608545000000000 |
| C            | 0.301355000000000  | -1.942317000000000 | 0.144895000000000  |
| C            | -0.068667000000000 | -2.822177000000000 | 1.173905000000000  |
| C            | -1.410045000000000 | -3.084866000000000 | 1.443284000000000  |
| C            | -2.404992000000000 | -2.466802000000000 | 0.684248000000000  |
| C            | -2.055979000000000 | -1.588642000000000 | -0.342955000000000 |
| H            | -0.436903000000000 | -0.644909000000000 | -1.413802000000000 |
| H            | 0.712463000000000  | -3.304157000000000 | 1.767984000000000  |
| H            | -1.684113000000000 | -3.772520000000000 | 2.247373000000000  |
| H            | -3.458223000000000 | -2.670774000000000 | 0.894217000000000  |
| H            | -2.835661000000000 | -1.105384000000000 | -0.937186000000000 |
| <b>HBpin</b> |                    |                    |                    |
| B            | 2.313689000000000  | 0.755771000000000  | -1.936970000000000 |
| O            | 2.389622000000000  | -0.100982000000000 | -0.883533000000000 |
| O            | 3.467591000000000  | 0.847667000000000  | -2.650982000000000 |
| C            | 3.639989000000000  | -0.812913000000000 | -0.999799000000000 |
| C            | 4.488109000000000  | 0.148251000000000  | -1.907132000000000 |
| C            | 4.206367000000000  | -1.043854000000000 | 0.387610000000000  |
| C            | 3.326101000000000  | -2.143946000000000 | -1.671567000000000 |
| C            | 5.416436000000000  | -0.550457000000000 | -2.881297000000000 |
| C            | 5.250235000000000  | 1.201111000000000  | -1.112092000000000 |
| H            | 3.544682000000000  | -1.719613000000000 | 0.948397000000000  |
| H            | 5.200714000000000  | -1.511059000000000 | 0.329045000000000  |
| H            | 4.290273000000000  | -0.106501000000000 | 0.951762000000000  |
| H            | 4.216477000000000  | -2.785100000000000 | -1.737419000000000 |
| H            | 2.563403000000000  | -2.668800000000000 | -1.078827000000000 |
| H            | 2.925885000000000  | -1.995046000000000 | -2.684992000000000 |

|   |                   |                    |                    |
|---|-------------------|--------------------|--------------------|
| H | 5.960666000000000 | 0.198520000000000  | -3.474379000000000 |
| H | 6.155625000000000 | -1.162439000000000 | -2.343141000000000 |
| H | 4.863328000000000 | -1.195743000000000 | -3.575283000000000 |
| H | 4.594042000000000 | 1.708975000000000  | -0.390386000000000 |
| H | 6.098003000000000 | 0.762928000000000  | -0.566701000000000 |
| H | 5.639051000000000 | 1.957628000000000  | -1.808477000000000 |
| H | 1.319819000000000 | 1.373913000000000  | -2.211198000000000 |

**12**

|    |                    |                    |                    |
|----|--------------------|--------------------|--------------------|
| Fe | -1.429380000000000 | 1.482030000000000  | 0.411632000000000  |
| P  | -0.777513000000000 | 0.551421000000000  | -1.435397000000000 |
| P  | -0.048213000000000 | 0.626515000000000  | 1.867021000000000  |
| C  | 0.377674000000000  | 1.879130000000000  | 3.193168000000000  |
| H  | 0.169339000000000  | 2.851684000000000  | 2.729169000000000  |
| H  | -0.380060000000000 | 1.746820000000000  | 3.983665000000000  |
| C  | 1.772124000000000  | 1.891066000000000  | 3.795122000000000  |
| H  | 2.534643000000000  | 2.071968000000000  | 3.023215000000000  |
| H  | 1.859581000000000  | 2.698775000000000  | 4.539682000000000  |
| H  | 2.025192000000000  | 0.948985000000000  | 4.304501000000000  |
| C  | -0.779408000000000 | -0.742763000000000 | 2.894718000000000  |
| H  | -1.771911000000000 | -0.387943000000000 | 3.210690000000000  |
| H  | -0.978021000000000 | -1.572182000000000 | 2.196197000000000  |
| C  | 0.009659000000000  | -1.222895000000000 | 4.103302000000000  |
| H  | 0.130785000000000  | -0.424894000000000 | 4.851370000000000  |
| H  | -0.507317000000000 | -2.058266000000000 | 4.601957000000000  |
| H  | 1.016381000000000  | -1.577033000000000 | 3.833811000000000  |
| C  | 1.591946000000000  | -0.128235000000000 | 1.440791000000000  |
| H  | 2.046699000000000  | 0.552445000000000  | 0.708642000000000  |
| H  | 2.239722000000000  | -0.102938000000000 | 2.328896000000000  |
| C  | 1.510189000000000  | -1.556507000000000 | 0.918606000000000  |
| H  | 0.717490000000000  | -1.685378000000000 | 0.167647000000000  |
| H  | 2.460374000000000  | -1.858635000000000 | 0.451127000000000  |
| H  | 1.303324000000000  | -2.274029000000000 | 1.726019000000000  |
| C  | 1.033384000000000  | 0.435079000000000  | -1.853257000000000 |
| H  | 1.489287000000000  | 1.284637000000000  | -1.323930000000000 |
| H  | 1.412744000000000  | -0.462483000000000 | -1.346506000000000 |
| C  | 1.484334000000000  | 0.432891000000000  | -3.306215000000000 |
| H  | 2.585195000000000  | 0.430571000000000  | -3.353658000000000 |
| H  | 1.133381000000000  | -0.448784000000000 | -3.859811000000000 |
| H  | 1.141849000000000  | 1.326695000000000  | -3.848025000000000 |
| C  | -1.402522000000000 | -1.198169000000000 | -1.639603000000000 |
| H  | -2.476650000000000 | -1.096601000000000 | -1.869151000000000 |
| H  | -1.371004000000000 | -1.611005000000000 | -0.618878000000000 |
| C  | -0.727488000000000 | -2.155861000000000 | -2.609239000000000 |
| H  | 0.337258000000000  | -2.294453000000000 | -2.366604000000000 |

|           |                    |                    |                    |
|-----------|--------------------|--------------------|--------------------|
| H         | -1.200702000000000 | -3.149696000000000 | -2.560452000000000 |
| H         | -0.789258000000000 | -1.814422000000000 | -3.651408000000000 |
| C         | -1.481228000000000 | 1.450647000000000  | -2.907261000000000 |
| H         | -2.420372000000000 | 1.889318000000000  | -2.546164000000000 |
| H         | -0.814709000000000 | 2.314439000000000  | -3.060133000000000 |
| C         | -1.747226000000000 | 0.713536000000000  | -4.211111000000000 |
| H         | -2.199765000000000 | 1.399050000000000  | -4.945468000000000 |
| H         | -0.837633000000000 | 0.301620000000000  | -4.667666000000000 |
| H         | -2.455680000000000 | -0.116811000000000 | -4.069953000000000 |
| B         | -0.106567000000000 | 2.856465000000000  | 0.001410000000000  |
| O         | 1.261732000000000  | 2.886171000000000  | 0.334778000000000  |
| O         | -0.399621000000000 | 4.048122000000000  | -0.677063000000000 |
| C         | 1.788322000000000  | 4.195168000000000  | 0.105971000000000  |
| C         | 0.803186000000000  | 4.756681000000000  | -0.970375000000000 |
| C         | 1.712180000000000  | 4.960488000000000  | 1.423679000000000  |
| C         | 3.233978000000000  | 4.078578000000000  | -0.342204000000000 |
| C         | 1.218524000000000  | 4.397861000000000  | -2.394541000000000 |
| C         | 0.536967000000000  | 6.249122000000000  | -0.877541000000000 |
| H         | 2.259549000000000  | 4.400811000000000  | 2.195495000000000  |
| H         | 2.157162000000000  | 5.962985000000000  | 1.343936000000000  |
| H         | 0.668872000000000  | 5.066397000000000  | 1.755391000000000  |
| H         | 3.646763000000000  | 5.063772000000000  | -0.608246000000000 |
| H         | 3.842628000000000  | 3.665340000000000  | 0.475986000000000  |
| H         | 3.335495000000000  | 3.411285000000000  | -1.208101000000000 |
| H         | 0.383857000000000  | 4.625914000000000  | -3.073614000000000 |
| H         | 2.098801000000000  | 4.968189000000000  | -2.725457000000000 |
| H         | 1.444967000000000  | 3.326080000000000  | -2.482722000000000 |
| H         | 1.464397000000000  | 6.827284000000000  | -1.010129000000000 |
| H         | -0.166111000000000 | 6.547215000000000  | -1.669338000000000 |
| H         | 0.088573000000000  | 6.517779000000000  | 0.087476000000000  |
| C         | -2.771024000000000 | 1.817636000000000  | 1.961805000000000  |
| C         | -2.608153000000000 | 2.991078000000000  | 1.177273000000000  |
| H         | -2.567117000000000 | 1.744502000000000  | 3.029282000000000  |
| C         | -3.290657000000000 | 0.774914000000000  | 1.132422000000000  |
| C         | -3.021904000000000 | 2.683032000000000  | -0.152394000000000 |
| H         | -2.264411000000000 | 3.960595000000000  | 1.532498000000000  |
| H         | -3.552114000000000 | -0.234743000000000 | 1.444022000000000  |
| C         | -3.427788000000000 | 1.316805000000000  | -0.171212000000000 |
| H         | -3.004542000000000 | 3.373715000000000  | -0.992311000000000 |
| H         | -3.810935000000000 | 0.780175000000000  | -1.039302000000000 |
| <b>13</b> |                    |                    |                    |
| Fe        | 0.376422000000000  | -0.357193000000000 | -1.345969000000000 |
| P         | -0.373407000000000 | -1.125074000000000 | 0.540533000000000  |
| C         | -0.877059000000000 | -2.911568000000000 | 0.497963000000000  |

|   |                    |                    |                    |
|---|--------------------|--------------------|--------------------|
| H | -1.485379000000000 | -3.037878000000000 | -0.410892000000000 |
| H | 0.059418000000000  | -3.460177000000000 | 0.301247000000000  |
| C | -1.604179000000000 | -3.483450000000000 | 1.704507000000000  |
| H | -2.591605000000000 | -3.018365000000000 | 1.844007000000000  |
| H | -1.769307000000000 | -4.565003000000000 | 1.579508000000000  |
| H | -1.037893000000000 | -3.348505000000000 | 2.638887000000000  |
| C | 0.844370000000000  | -1.133390000000000 | 1.936439000000000  |
| H | 1.732382000000000  | -1.659244000000000 | 1.546412000000000  |
| H | 0.437915000000000  | -1.764020000000000 | 2.744500000000000  |
| C | 1.231250000000000  | 0.237075000000000  | 2.473339000000000  |
| H | 1.596621000000000  | 0.902217000000000  | 1.677902000000000  |
| H | 0.375019000000000  | 0.736474000000000  | 2.952753000000000  |
| H | 2.018921000000000  | 0.142551000000000  | 3.236794000000000  |
| C | -1.840648000000000 | -0.298842000000000 | 1.294555000000000  |
| H | -2.101501000000000 | -0.809318000000000 | 2.236441000000000  |
| H | -1.514164000000000 | 0.717633000000000  | 1.558414000000000  |
| C | -3.026218000000000 | -0.220249000000000 | 0.346561000000000  |
| H | -3.373654000000000 | -1.218350000000000 | 0.034971000000000  |
| H | -3.877070000000000 | 0.289565000000000  | 0.824558000000000  |
| H | -2.752326000000000 | 0.348840000000000  | -0.553579000000000 |
| B | 0.151368000000000  | 1.492541000000000  | -0.736800000000000 |
| O | 1.215172000000000  | 2.240973000000000  | -0.221598000000000 |
| O | -0.962015000000000 | 2.316876000000000  | -0.869323000000000 |
| C | 0.878740000000000  | 3.631884000000000  | -0.307952000000000 |
| C | -0.683187000000000 | 3.587753000000000  | -0.269431000000000 |
| C | 1.529068000000000  | 4.377954000000000  | 0.841998000000000  |
| C | 1.418045000000000  | 4.144347000000000  | -1.639737000000000 |
| C | -1.373984000000000 | 4.675776000000000  | -1.070991000000000 |
| C | -1.233795000000000 | 3.558090000000000  | 1.152564000000000  |
| H | 2.623127000000000  | 4.345696000000000  | 0.732413000000000  |
| H | 1.219225000000000  | 5.434289000000000  | 0.850626000000000  |
| H | 1.273945000000000  | 3.929300000000000  | 1.810728000000000  |
| H | 2.496811000000000  | 3.936252000000000  | -1.687309000000000 |
| H | 0.934727000000000  | 3.626357000000000  | -2.481078000000000 |
| H | 1.267358000000000  | 5.227328000000000  | -1.758445000000000 |
| H | -1.104701000000000 | 5.674780000000000  | -0.695016000000000 |
| H | -1.112132000000000 | 4.617339000000000  | -2.135228000000000 |
| H | -2.464810000000000 | 4.562214000000000  | -0.985128000000000 |
| H | -0.703964000000000 | 2.812806000000000  | 1.763215000000000  |
| H | -1.149035000000000 | 4.536367000000000  | 1.647865000000000  |
| H | -2.296876000000000 | 3.278630000000000  | 1.115068000000000  |
| C | -0.728083000000000 | 0.054907000000000  | -2.998590000000000 |
| C | 0.661794000000000  | 0.166005000000000  | -3.321064000000000 |
| H | -1.464131000000000 | 0.855509000000000  | -3.045163000000000 |

|           |                    |                    |                    |
|-----------|--------------------|--------------------|--------------------|
| C         | -0.977869000000000 | -1.278971000000000 | -2.576324000000000 |
| C         | 1.247622000000000  | -1.112007000000000 | -3.080399000000000 |
| H         | 1.173789000000000  | 1.050100000000000  | -3.697322000000000 |
| H         | -1.949612000000000 | -1.666499000000000 | -2.272570000000000 |
| C         | 0.248622000000000  | -2.017830000000000 | -2.644832000000000 |
| H         | 2.308888000000000  | -1.345867000000000 | -3.181393000000000 |
| H         | 0.387811000000000  | -3.073492000000000 | -2.418928000000000 |
| <b>14</b> |                    |                    |                    |
| Fe        | 0.438401000000000  | -0.246926000000000 | -1.455720000000000 |
| P         | 0.603565000000000  | 1.862535000000000  | -0.759828000000000 |
| C         | -0.218177000000000 | 2.966120000000000  | -2.006791000000000 |
| H         | 0.182772000000000  | 2.684947000000000  | -2.991194000000000 |
| H         | -1.272384000000000 | 2.646505000000000  | -2.009016000000000 |
| C         | -0.111115000000000 | 4.471803000000000  | -1.820919000000000 |
| H         | 0.931710000000000  | 4.820713000000000  | -1.866068000000000 |
| H         | -0.661974000000000 | 4.991752000000000  | -2.620104000000000 |
| H         | -0.536817000000000 | 4.810809000000000  | -0.865168000000000 |
| C         | -0.262895000000000 | 2.434097000000000  | 0.772330000000000  |
| H         | -1.312583000000000 | 2.128244000000000  | 0.643701000000000  |
| H         | -0.242248000000000 | 3.535049000000000  | 0.736492000000000  |
| C         | 0.263851000000000  | 1.959278000000000  | 2.115295000000000  |
| H         | 0.240265000000000  | 0.866550000000000  | 2.195108000000000  |
| H         | 1.302387000000000  | 2.277407000000000  | 2.286799000000000  |
| H         | -0.356484000000000 | 2.378791000000000  | 2.922746000000000  |
| C         | 2.258487000000000  | 2.660417000000000  | -0.545932000000000 |
| H         | 2.089277000000000  | 3.708748000000000  | -0.250236000000000 |
| H         | 2.710493000000000  | 2.149378000000000  | 0.315075000000000  |
| C         | 3.176955000000000  | 2.577307000000000  | -1.752318000000000 |
| H         | 2.761712000000000  | 3.099891000000000  | -2.628937000000000 |
| H         | 4.153805000000000  | 3.035457000000000  | -1.532796000000000 |
| H         | 3.357378000000000  | 1.531556000000000  | -2.041361000000000 |
| B         | 1.887717000000000  | -0.758469000000000 | -0.097114000000000 |
| O         | 2.773509000000000  | -1.811718000000000 | -0.288022000000000 |
| O         | 2.284934000000000  | -0.002201000000000 | 0.992973000000000  |
| C         | 3.925800000000000  | -1.586172000000000 | 0.529650000000000  |
| C         | 3.339812000000000  | -0.694667000000000 | 1.673429000000000  |
| C         | 4.479853000000000  | -2.923400000000000 | 0.983752000000000  |
| C         | 4.956387000000000  | -0.850182000000000 | -0.320637000000000 |
| C         | 4.305818000000000  | 0.318452000000000  | 2.257700000000000  |
| C         | 2.691797000000000  | -1.510371000000000 | 2.786596000000000  |
| H         | 4.861855000000000  | -3.479493000000000 | 0.115224000000000  |
| H         | 5.310874000000000  | -2.783432000000000 | 1.691518000000000  |
| H         | 3.706557000000000  | -3.536340000000000 | 1.463919000000000  |
| H         | 5.164294000000000  | -1.445875000000000 | -1.221509000000000 |

|   |                    |                    |                    |
|---|--------------------|--------------------|--------------------|
| H | 4.577486000000000  | 0.131340000000000  | -0.640072000000000 |
| H | 5.902949000000000  | -0.701450000000000 | 0.218394000000000  |
| H | 5.167450000000000  | -0.185925000000000 | 2.720509000000000  |
| H | 4.677549000000000  | 1.013701000000000  | 1.493932000000000  |
| H | 3.798667000000000  | 0.907110000000000  | 3.036213000000000  |
| H | 1.999915000000000  | -2.259325000000000 | 2.374068000000000  |
| H | 3.439539000000000  | -2.026377000000000 | 3.405780000000000  |
| H | 2.114865000000000  | -0.832856000000000 | 3.432482000000000  |
| C | 1.831397000000000  | -0.931722000000000 | -2.880576000000000 |
| C | 0.837075000000000  | -1.927535000000000 | -2.634551000000000 |
| H | 2.900942000000000  | -1.048430000000000 | -2.728511000000000 |
| C | 1.167229000000000  | 0.218073000000000  | -3.373907000000000 |
| C | -0.425415000000000 | -1.387278000000000 | -2.970933000000000 |
| H | 1.022929000000000  | -2.913855000000000 | -2.213503000000000 |
| H | 1.650161000000000  | 1.147302000000000  | -3.669221000000000 |
| C | -0.228115000000000 | -0.051711000000000 | -3.428886000000000 |
| H | -1.383770000000000 | -1.892179000000000 | -2.866602000000000 |
| H | -0.997455000000000 | 0.630592000000000  | -3.782692000000000 |
| C | -2.483595000000000 | 0.329648000000000  | -1.172512000000000 |
| C | -1.328266000000000 | -0.196495000000000 | -0.554967000000000 |
| C | -1.534235000000000 | -0.692174000000000 | 0.751670000000000  |
| C | -2.770285000000000 | -0.641964000000000 | 1.398512000000000  |
| C | -3.880841000000000 | -0.092285000000000 | 0.760667000000000  |
| C | -3.726279000000000 | 0.388905000000000  | -0.538364000000000 |
| H | -2.425236000000000 | 0.720490000000000  | -2.191680000000000 |
| H | 0.614232000000000  | -1.123253000000000 | -0.212095000000000 |
| H | -0.696972000000000 | -1.129128000000000 | 1.304554000000000  |
| H | -2.862281000000000 | -1.038197000000000 | 2.414364000000000  |
| H | -4.850279000000000 | -0.046785000000000 | 1.263349000000000  |
| H | -4.582367000000000 | 0.815848000000000  | -1.069846000000000 |

**15**

|    |                    |                    |                    |
|----|--------------------|--------------------|--------------------|
| Fe | 0.275883000000000  | -0.002142000000000 | -1.494313000000000 |
| P  | 0.522040000000000  | 2.215338000000000  | -1.131376000000000 |
| C  | -0.058280000000000 | 3.291153000000000  | -2.530404000000000 |
| H  | 0.202200000000000  | 2.791354000000000  | -3.472768000000000 |
| H  | -1.159677000000000 | 3.258853000000000  | -2.472544000000000 |
| C  | 0.438859000000000  | 4.728599000000000  | -2.561931000000000 |
| H  | 1.528670000000000  | 4.780522000000000  | -2.702419000000000 |
| H  | -0.024639000000000 | 5.273039000000000  | -3.399028000000000 |
| H  | 0.196404000000000  | 5.283706000000000  | -1.643486000000000 |
| C  | -0.296088000000000 | 3.128744000000000  | 0.267070000000000  |
| H  | -1.353492000000000 | 2.815315000000000  | 0.256461000000000  |
| H  | -0.298704000000000 | 4.192930000000000  | -0.016011000000000 |
| C  | 0.311195000000000  | 2.970671000000000  | 1.654109000000000  |

|   |                    |                    |                    |
|---|--------------------|--------------------|--------------------|
| H | 0.450323000000000  | 1.918427000000000  | 1.936933000000000  |
| H | 1.304624000000000  | 3.440307000000000  | 1.705317000000000  |
| H | -0.327022000000000 | 3.464376000000000  | 2.403016000000000  |
| C | 2.286818000000000  | 2.689352000000000  | -0.891810000000000 |
| H | 2.341398000000000  | 3.766563000000000  | -0.663868000000000 |
| H | 2.585189000000000  | 2.143143000000000  | 0.017928000000000  |
| C | 3.197627000000000  | 2.327539000000000  | -2.053390000000000 |
| H | 2.928745000000000  | 2.864596000000000  | -2.976860000000000 |
| H | 4.243411000000000  | 2.579545000000000  | -1.820076000000000 |
| H | 3.154357000000000  | 1.250006000000000  | -2.268190000000000 |
| B | 1.351681000000000  | -0.745122000000000 | 0.428484000000000  |
| O | 2.221338000000000  | -1.877848000000000 | 0.443600000000000  |
| O | 1.864550000000000  | 0.221261000000000  | 1.366813000000000  |
| C | 3.420941000000000  | -1.487332000000000 | 1.088266000000000  |
| C | 2.910326000000000  | -0.401209000000000 | 2.096813000000000  |
| C | 4.054157000000000  | -2.706677000000000 | 1.735906000000000  |
| C | 4.372520000000000  | -0.902475000000000 | 0.044560000000000  |
| C | 3.942709000000000  | 0.644091000000000  | 2.482890000000000  |
| C | 2.303159000000000  | -1.026937000000000 | 3.351293000000000  |
| H | 4.388805000000000  | -3.407966000000000 | 0.956771000000000  |
| H | 4.929836000000000  | -2.426075000000000 | 2.341273000000000  |
| H | 3.334889000000000  | -3.233390000000000 | 2.376328000000000  |
| H | 4.505988000000000  | -1.640324000000000 | -0.760610000000000 |
| H | 3.957492000000000  | 0.013155000000000  | -0.399869000000000 |
| H | 5.360846000000000  | -0.668110000000000 | 0.466657000000000  |
| H | 4.808062000000000  | 0.181496000000000  | 2.982231000000000  |
| H | 4.300924000000000  | 1.198155000000000  | 1.605007000000000  |
| H | 3.495184000000000  | 1.368273000000000  | 3.180374000000000  |
| H | 1.580925000000000  | -1.810866000000000 | 3.080736000000000  |
| H | 3.066092000000000  | -1.461647000000000 | 4.014177000000000  |
| H | 1.764030000000000  | -0.246486000000000 | 3.908276000000000  |
| C | 1.235299000000000  | -0.969226000000000 | -3.059465000000000 |
| C | 0.197843000000000  | -1.797338000000000 | -2.564558000000000 |
| H | 2.297431000000000  | -1.209774000000000 | -3.056828000000000 |
| C | 0.660204000000000  | 0.247924000000000  | -3.504421000000000 |
| C | -1.029642000000000 | -1.083451000000000 | -2.706824000000000 |
| H | 0.321763000000000  | -2.785956000000000 | -2.131409000000000 |
| H | 1.209537000000000  | 1.067128000000000  | -3.963232000000000 |
| C | -0.759796000000000 | 0.172013000000000  | -3.294994000000000 |
| H | -2.003832000000000 | -1.429873000000000 | -2.364861000000000 |
| H | -1.496584000000000 | 0.931474000000000  | -3.548615000000000 |
| C | -1.200351000000000 | -0.087863000000000 | 0.347225000000000  |
| C | -0.198307000000000 | -1.082495000000000 | 0.360690000000000  |
| C | -0.631839000000000 | -2.439171000000000 | 0.288863000000000  |

|           |                    |                    |                    |
|-----------|--------------------|--------------------|--------------------|
| C         | -1.965134000000000 | -2.771897000000000 | 0.210028000000000  |
| C         | -2.950076000000000 | -1.756360000000000 | 0.155288000000000  |
| C         | -2.571598000000000 | -0.434485000000000 | 0.228678000000000  |
| H         | -0.964501000000000 | 0.920861000000000  | 0.669538000000000  |
| H         | 1.649071000000000  | -0.067233000000000 | -0.799685000000000 |
| H         | 0.134308000000000  | -3.218006000000000 | 0.332375000000000  |
| H         | -2.270671000000000 | -3.821705000000000 | 0.200336000000000  |
| H         | -4.007432000000000 | -2.025547000000000 | 0.086998000000000  |
| H         | -3.327398000000000 | 0.355725000000000  | 0.236745000000000  |
| <b>16</b> |                    |                    |                    |
| Fe        | 1.070803000000000  | 1.495486000000000  | -1.638142000000000 |
| P         | 0.087784000000000  | 1.992540000000000  | 0.241564000000000  |
| C         | 0.951120000000000  | 1.256274000000000  | 1.708191000000000  |
| H         | 0.640305000000000  | 0.197317000000000  | 1.729738000000000  |
| H         | 2.016625000000000  | 1.250084000000000  | 1.427963000000000  |
| C         | 0.775717000000000  | 1.903695000000000  | 3.074458000000000  |
| H         | 1.153225000000000  | 2.936757000000000  | 3.084124000000000  |
| H         | -0.273750000000000 | 1.932287000000000  | 3.397713000000000  |
| H         | 1.341191000000000  | 1.345059000000000  | 3.836540000000000  |
| C         | -0.049996000000000 | 3.794075000000000  | 0.619039000000000  |
| H         | -0.538950000000000 | 3.918924000000000  | 1.598944000000000  |
| H         | -0.752569000000000 | 4.189523000000000  | -0.133990000000000 |
| C         | 1.264927000000000  | 4.553816000000000  | 0.562590000000000  |
| H         | 1.747138000000000  | 4.416802000000000  | -0.414909000000000 |
| H         | 1.102761000000000  | 5.628716000000000  | 0.736912000000000  |
| H         | 1.975831000000000  | 4.195935000000000  | 1.323389000000000  |
| C         | -1.669747000000000 | 1.426735000000000  | 0.382552000000000  |
| H         | -2.178754000000000 | 1.898562000000000  | -0.475012000000000 |
| H         | -1.638389000000000 | 0.350823000000000  | 0.143581000000000  |
| C         | -2.449467000000000 | 1.669803000000000  | 1.665361000000000  |
| H         | -2.458353000000000 | 2.731714000000000  | 1.953865000000000  |
| H         | -3.498318000000000 | 1.357620000000000  | 1.542001000000000  |
| H         | -2.038778000000000 | 1.095255000000000  | 2.508224000000000  |
| C         | -0.358044000000000 | 2.238115000000000  | -2.881061000000000 |
| C         | 0.943192000000000  | 2.587539000000000  | -3.339507000000000 |
| H         | -1.139676000000000 | 2.946647000000000  | -2.606502000000000 |
| C         | -0.471998000000000 | 0.809423000000000  | -2.879935000000000 |
| C         | 1.659730000000000  | 1.381254000000000  | -3.611648000000000 |
| H         | 1.325343000000000  | 3.601870000000000  | -3.443278000000000 |
| H         | -1.350289000000000 | 0.225755000000000  | -2.609509000000000 |
| C         | 0.782191000000000  | 0.300421000000000  | -3.305583000000000 |
| H         | 2.679113000000000  | 1.300999000000000  | -3.983908000000000 |
| H         | 1.045814000000000  | -0.757613000000000 | -3.355455000000000 |
| H         | 2.283045000000000  | 2.254807000000000  | -1.076005000000000 |



17

|    |                    |                    |                    |
|----|--------------------|--------------------|--------------------|
| Fe | -1.427050000000000 | 1.171452000000000  | 0.257146000000000  |
| P  | -0.738558000000000 | 0.002758000000000  | -1.426018000000000 |
| P  | -0.177880000000000 | 0.445009000000000  | 1.872857000000000  |
| C  | 0.439836000000000  | 1.893738000000000  | 2.880251000000000  |
| H  | 0.477183000000000  | 2.721038000000000  | 2.156391000000000  |
| H  | -0.385492000000000 | 2.138546000000000  | 3.570157000000000  |
| C  | 1.756946000000000  | 1.803389000000000  | 3.635926000000000  |
| H  | 2.608463000000000  | 1.666715000000000  | 2.952471000000000  |
| H  | 1.939182000000000  | 2.735479000000000  | 4.194249000000000  |
| H  | 1.778698000000000  | 0.978270000000000  | 4.362680000000000  |
| C  | -1.056152000000000 | -0.589196000000000 | 3.143844000000000  |
| H  | -1.984702000000000 | -0.045959000000000 | 3.376851000000000  |
| H  | -1.381332000000000 | -1.494518000000000 | 2.604731000000000  |
| C  | -0.326129000000000 | -0.950601000000000 | 4.427649000000000  |
| H  | -0.097326000000000 | -0.058222000000000 | 5.028966000000000  |
| H  | -0.944408000000000 | -1.613266000000000 | 5.053924000000000  |
| H  | 0.622878000000000  | -1.475366000000000 | 4.237692000000000  |
| C  | 1.364373000000000  | -0.554490000000000 | 1.632123000000000  |
| H  | 1.946293000000000  | -0.041953000000000 | 0.850405000000000  |
| H  | 1.973163000000000  | -0.504160000000000 | 2.546971000000000  |
| C  | 1.108950000000000  | -2.010369000000000 | 1.269369000000000  |
| H  | 2.035079000000000  | -2.505645000000000 | 0.938701000000000  |
| H  | 0.725788000000000  | -2.577746000000000 | 2.130425000000000  |
| H  | 0.369597000000000  | -2.113034000000000 | 0.462354000000000  |
| C  | 1.062374000000000  | -0.249738000000000 | -1.785676000000000 |
| H  | 1.472554000000000  | -0.892902000000000 | -0.996220000000000 |
| H  | 1.145363000000000  | -0.830179000000000 | -2.717207000000000 |
| C  | 1.862391000000000  | 1.038378000000000  | -1.891023000000000 |
| H  | 2.931410000000000  | 0.823934000000000  | -2.045601000000000 |
| H  | 1.524441000000000  | 1.658947000000000  | -2.735477000000000 |
| H  | 1.751251000000000  | 1.645965000000000  | -0.981242000000000 |
| C  | -1.439121000000000 | -1.726763000000000 | -1.565217000000000 |
| H  | -2.435326000000000 | -1.595639000000000 | -2.021394000000000 |
| H  | -1.637721000000000 | -2.031522000000000 | -0.525619000000000 |
| C  | -0.657120000000000 | -2.813542000000000 | -2.288451000000000 |
| H  | 0.307579000000000  | -3.014924000000000 | -1.798803000000000 |
| H  | -1.223066000000000 | -3.758698000000000 | -2.289699000000000 |
| H  | -0.445978000000000 | -2.556436000000000 | -3.336022000000000 |
| C  | -1.283493000000000 | 0.775617000000000  | -3.028385000000000 |
| H  | -2.375342000000000 | 0.886990000000000  | -2.944460000000000 |
| H  | -0.882920000000000 | 1.801901000000000  | -2.996860000000000 |
| C  | -0.931624000000000 | 0.096702000000000  | -4.342056000000000 |
| H  | -1.297191000000000 | 0.693612000000000  | -5.192674000000000 |

|   |                    |                    |                    |
|---|--------------------|--------------------|--------------------|
| H | 0.154358000000000  | -0.022349000000000 | -4.475577000000000 |
| H | -1.391574000000000 | -0.899289000000000 | -4.426241000000000 |
| C | -2.773334000000000 | 1.944047000000000  | 1.637603000000000  |
| C | -2.477169000000000 | 2.912797000000000  | 0.645484000000000  |
| H | -2.620926000000000 | 2.073205000000000  | 2.708471000000000  |
| C | -3.352440000000000 | 0.798051000000000  | 0.999656000000000  |
| C | -2.862181000000000 | 2.383462000000000  | -0.619085000000000 |
| H | -2.030456000000000 | 3.889544000000000  | 0.823156000000000  |
| H | -3.719133000000000 | -0.102372000000000 | 1.489380000000000  |
| C | -3.391973000000000 | 1.074636000000000  | -0.390152000000000 |
| H | -2.782211000000000 | 2.890177000000000  | -1.578429000000000 |
| H | -3.795207000000000 | 0.407073000000000  | -1.151875000000000 |
| H | -0.191969000000000 | 1.987229000000000  | -0.046368000000000 |

**S24**

|    |                  |                  |                  |
|----|------------------|------------------|------------------|
| Fe | 0.5102490000000  | -0.4223730000000 | 0.6494830000000  |
| P  | 0.0763020000000  | 1.7910520000000  | 0.7305890000000  |
| C  | 1.5481360000000  | 2.9155080000000  | 0.6120260000000  |
| H  | 1.9523900000000  | 2.8122310000000  | -0.4070510000000 |
| H  | 1.2157340000000  | 3.9627270000000  | 0.6997300000000  |
| C  | 2.6138330000000  | 2.5828830000000  | 1.6441850000000  |
| H  | 3.5335920000000  | 3.1630450000000  | 1.4733920000000  |
| H  | 2.2740640000000  | 2.8036070000000  | 2.6676650000000  |
| H  | 2.8629960000000  | 1.5113480000000  | 1.6044160000000  |
| C  | -1.1489200000000 | 2.6326360000000  | -0.3814160000000 |
| H  | -1.2173230000000 | 3.6730980000000  | -0.0275570000000 |
| H  | -2.1126160000000 | 2.1545500000000  | -0.1425020000000 |
| C  | -0.9386790000000 | 2.6235400000000  | -1.8856230000000 |
| H  | -0.0112870000000 | 3.1398160000000  | -2.1757500000000 |
| H  | -0.9106080000000 | 1.6020090000000  | -2.2870010000000 |
| H  | -1.7711110000000 | 3.1526860000000  | -2.3752230000000 |
| C  | -0.6350410000000 | 2.3215090000000  | 2.3670900000000  |
| H  | -1.4922240000000 | 1.6549560000000  | 2.5526290000000  |
| H  | 0.1183910000000  | 2.0504910000000  | 3.1194190000000  |
| C  | -1.0396610000000 | 3.7754840000000  | 2.5558230000000  |
| H  | -0.2173440000000 | 4.4703800000000  | 2.3247060000000  |
| H  | -1.9011760000000 | 4.0562820000000  | 1.9336570000000  |
| H  | -1.3273130000000 | 3.9528920000000  | 3.6038480000000  |
| B  | 2.1939190000000  | 0.7188850000000  | -1.7620940000000 |
| O  | 2.3159130000000  | -0.1437430000000 | -0.6936170000000 |
| O  | 3.3189190000000  | 0.8105740000000  | -2.5102290000000 |
| C  | 3.5580840000000  | -0.8928810000000 | -0.9244750000000 |
| C  | 4.3641180000000  | 0.1133430000000  | -1.8093980000000 |
| C  | 4.2629080000000  | -1.2282310000000 | 0.3710130000000  |
| C  | 3.1909330000000  | -2.1628740000000 | -1.6758350000000 |

|            |                 |                 |                 |
|------------|-----------------|-----------------|-----------------|
| C          | 5.289631000000  | -0.537570000000 | -2.818226000000 |
| C          | 5.118100000000  | 1.156217000000  | -0.992658000000 |
| H          | 3.770205000000  | -2.062291000000 | 0.882785000000  |
| H          | 5.293451000000  | -1.541170000000 | 0.146454000000  |
| H          | 4.302180000000  | -0.367886000000 | 1.049900000000  |
| H          | 4.064284000000  | -2.821991000000 | -1.777475000000 |
| H          | 2.410841000000  | -2.698288000000 | -1.120223000000 |
| H          | 2.802987000000  | -1.944675000000 | -2.680395000000 |
| H          | 5.817006000000  | 0.242016000000  | -3.386151000000 |
| H          | 6.043479000000  | -1.158414000000 | -2.311745000000 |
| H          | 4.738081000000  | -1.162403000000 | -3.531435000000 |
| H          | 4.472552000000  | 1.604932000000  | -0.225133000000 |
| H          | 6.001941000000  | 0.728065000000  | -0.500174000000 |
| H          | 5.452668000000  | 1.955652000000  | -1.668673000000 |
| C          | 1.590503000000  | -1.368235000000 | 2.248814000000  |
| C          | 0.533227000000  | -0.606097000000 | 2.774899000000  |
| H          | 2.638549000000  | -1.237694000000 | 2.503367000000  |
| C          | 1.032229000000  | -2.341015000000 | 1.357681000000  |
| C          | -0.695707000000 | -1.081313000000 | 2.217097000000  |
| H          | 0.643048000000  | 0.189228000000  | 3.507714000000  |
| H          | 1.574718000000  | -3.103837000000 | 0.802453000000  |
| C          | -0.371899000000 | -2.166723000000 | 1.356062000000  |
| H          | -1.697169000000 | -0.724114000000 | 2.449631000000  |
| H          | -1.082175000000 | -2.745953000000 | 0.769775000000  |
| C          | -2.085023000000 | -0.458273000000 | -0.759412000000 |
| C          | -0.689801000000 | -0.642518000000 | -0.887949000000 |
| C          | -0.273488000000 | -1.070280000000 | -2.164446000000 |
| C          | -1.152318000000 | -1.245444000000 | -3.237450000000 |
| C          | -2.516955000000 | -1.015747000000 | -3.075663000000 |
| C          | -2.979248000000 | -0.629915000000 | -1.816036000000 |
| H          | -2.496064000000 | -0.157147000000 | 0.210787000000  |
| H          | 1.215054000000  | 1.344881000000  | -2.001281000000 |
| H          | 0.782260000000  | -1.284416000000 | -2.345412000000 |
| H          | -0.763148000000 | -1.568134000000 | -4.208445000000 |
| H          | -3.209989000000 | -1.145265000000 | -3.911064000000 |
| H          | -4.048609000000 | -0.458970000000 | -1.655633000000 |
| <b>S25</b> |                 |                 |                 |
| Fe         | 0.104448000000  | 0.018415000000  | -0.163208000000 |
| P          | 0.249451000000  | 2.150283000000  | 0.629016000000  |
| C          | 0.306040000000  | 2.287439000000  | 2.475466000000  |
| H          | 0.189263000000  | 3.353574000000  | 2.730169000000  |
| H          | -0.597886000000 | 1.785763000000  | 2.854001000000  |
| C          | 1.541988000000  | 1.711254000000  | 3.137832000000  |
| H          | 2.453083000000  | 2.251894000000  | 2.841363000000  |

|   |                 |                 |                 |
|---|-----------------|-----------------|-----------------|
| H | 1.462749000000  | 1.774293000000  | 4.233551000000  |
| H | 1.678201000000  | 0.656820000000  | 2.866103000000  |
| C | 1.689200000000  | 3.169895000000  | 0.101538000000  |
| H | 1.651401000000  | 3.224966000000  | -0.997032000000 |
| H | 2.570242000000  | 2.542721000000  | 0.305492000000  |
| C | 1.823156000000  | 4.556042000000  | 0.709188000000  |
| H | 2.715566000000  | 5.060005000000  | 0.307856000000  |
| H | 0.958144000000  | 5.197072000000  | 0.479628000000  |
| H | 1.934444000000  | 4.523246000000  | 1.803510000000  |
| C | -1.213062000000 | 3.250905000000  | 0.348523000000  |
| H | -2.071006000000 | 2.740722000000  | 0.816007000000  |
| H | -1.044955000000 | 4.164899000000  | 0.941506000000  |
| C | -1.536753000000 | 3.606726000000  | -1.091381000000 |
| H | -0.689840000000 | 4.096819000000  | -1.596119000000 |
| H | -1.805872000000 | 2.716000000000  | -1.673240000000 |
| H | -2.388180000000 | 4.302820000000  | -1.131931000000 |
| B | 2.527203000000  | 0.142980000000  | -1.550670000000 |
| O | 3.554179000000  | -0.853925000000 | -1.817605000000 |
| O | 2.128536000000  | -0.137380000000 | -0.104424000000 |
| C | 3.749099000000  | -1.703843000000 | -0.719669000000 |
| C | 3.198587000000  | -0.873783000000 | 0.492777000000  |
| C | 2.969553000000  | -3.003888000000 | -0.934100000000 |
| C | 5.232080000000  | -2.038596000000 | -0.607362000000 |
| C | 4.225578000000  | 0.145673000000  | 0.983319000000  |
| C | 2.726754000000  | -1.730237000000 | 1.651395000000  |
| H | 3.287611000000  | -3.444477000000 | -1.890601000000 |
| H | 3.151451000000  | -3.745055000000 | -0.141174000000 |
| H | 1.892627000000  | -2.804489000000 | -0.997916000000 |
| H | 5.533460000000  | -2.637877000000 | -1.479374000000 |
| H | 5.844604000000  | -1.128179000000 | -0.602557000000 |
| H | 5.451316000000  | -2.623623000000 | 0.299831000000  |
| H | 5.075107000000  | -0.337401000000 | 1.486658000000  |
| H | 4.604859000000  | 0.742691000000  | 0.142341000000  |
| H | 3.746949000000  | 0.824095000000  | 1.701488000000  |
| H | 2.387247000000  | -1.107425000000 | 2.490376000000  |
| H | 1.907709000000  | -2.397829000000 | 1.364334000000  |
| H | 3.560541000000  | -2.348440000000 | 2.017025000000  |
| C | -1.952305000000 | -0.255476000000 | -0.333206000000 |
| C | -1.277321000000 | -1.389933000000 | -0.868470000000 |
| H | -2.638693000000 | 0.397852000000  | -0.867665000000 |
| C | -1.570814000000 | -0.154515000000 | 1.033033000000  |
| C | -0.489435000000 | -1.973544000000 | 0.144778000000  |
| H | -1.312165000000 | -1.711233000000 | -1.907606000000 |
| H | -1.929526000000 | 0.593272000000  | 1.738179000000  |

|            |                 |                 |                 |
|------------|-----------------|-----------------|-----------------|
| C          | -0.649541000000 | -1.193179000000 | 1.332436000000  |
| H          | 0.145969000000  | -2.847757000000 | 0.026917000000  |
| H          | -0.182137000000 | -1.372362000000 | 2.298287000000  |
| C          | 0.221469000000  | 0.988511000000  | -2.597152000000 |
| C          | 1.175614000000  | -0.034175000000 | -2.449741000000 |
| C          | 0.992023000000  | -1.191539000000 | -3.242571000000 |
| C          | -0.080496000000 | -1.327169000000 | -4.110411000000 |
| C          | -1.042996000000 | -0.308196000000 | -4.202678000000 |
| C          | -0.888879000000 | 0.845849000000  | -3.450737000000 |
| H          | 0.410960000000  | 1.965714000000  | -2.149940000000 |
| H          | 2.963670000000  | 1.297940000000  | -1.684934000000 |
| H          | 1.754345000000  | -1.971496000000 | -3.189742000000 |
| H          | -0.175487000000 | -2.221501000000 | -4.732658000000 |
| H          | -1.889466000000 | -0.411257000000 | -4.886582000000 |
| H          | -1.607078000000 | 1.663268000000  | -3.557224000000 |
| <b>S26</b> |                 |                 |                 |
| Fe         | -0.033495000000 | -0.486815000000 | 1.039583000000  |
| P          | -0.325842000000 | 1.701319000000  | 0.991040000000  |
| C          | 1.052575000000  | 2.547596000000  | 0.103133000000  |
| H          | 1.004729000000  | 2.188328000000  | -0.936977000000 |
| H          | 0.869411000000  | 3.633963000000  | 0.071900000000  |
| C          | 2.408148000000  | 2.227785000000  | 0.715846000000  |
| H          | 3.225709000000  | 2.666943000000  | 0.124365000000  |
| H          | 2.496032000000  | 2.616197000000  | 1.742519000000  |
| H          | 2.572152000000  | 1.139529000000  | 0.767725000000  |
| C          | -1.856396000000 | 2.376741000000  | 0.193552000000  |
| H          | -2.128208000000 | 3.311843000000  | 0.709878000000  |
| H          | -2.643679000000 | 1.641785000000  | 0.426992000000  |
| C          | -1.786365000000 | 2.608662000000  | -1.309083000000 |
| H          | -1.071557000000 | 3.405200000000  | -1.564303000000 |
| H          | -1.494227000000 | 1.697610000000  | -1.849631000000 |
| H          | -2.772014000000 | 2.919250000000  | -1.688458000000 |
| C          | -0.360399000000 | 2.537223000000  | 2.642018000000  |
| H          | -1.314995000000 | 2.232337000000  | 3.102345000000  |
| H          | 0.427245000000  | 2.063078000000  | 3.247550000000  |
| C          | -0.214742000000 | 4.050386000000  | 2.658020000000  |
| H          | 0.776052000000  | 4.369129000000  | 2.301082000000  |
| H          | -0.969335000000 | 4.549284000000  | 2.030616000000  |
| H          | -0.333809000000 | 4.439338000000  | 3.680988000000  |
| C          | 1.071128000000  | -1.850240000000 | 2.148959000000  |
| C          | 0.603522000000  | -0.828871000000 | 3.015835000000  |
| H          | 2.120442000000  | -2.077888000000 | 1.954233000000  |
| C          | -0.037620000000 | -2.492844000000 | 1.529141000000  |
| C          | -0.823398000000 | -0.810377000000 | 2.898840000000  |

|   |                 |                 |                 |
|---|-----------------|-----------------|-----------------|
| H | 1.216670000000  | -0.188281000000 | 3.647081000000  |
| H | 0.007276000000  | -3.310265000000 | 0.812066000000  |
| C | -1.215651000000 | -1.835282000000 | 1.993728000000  |
| H | -1.503354000000 | -0.139962000000 | 3.422706000000  |
| H | -2.238064000000 | -2.060556000000 | 1.694205000000  |
| C | -2.037500000000 | -0.932677000000 | -1.195074000000 |
| C | -0.747098000000 | -0.623683000000 | -0.731919000000 |
| C | 0.247801000000  | -0.458064000000 | -1.719240000000 |
| C | -0.022654000000 | -0.590252000000 | -3.082460000000 |
| C | -1.318698000000 | -0.882574000000 | -3.510307000000 |
| C | -2.323351000000 | -1.054015000000 | -2.556527000000 |
| H | -2.852795000000 | -1.068583000000 | -0.476580000000 |
| H | 1.276479000000  | -0.205409000000 | -1.424111000000 |
| H | 0.778979000000  | -0.455089000000 | -3.815007000000 |
| H | -1.543027000000 | -0.975086000000 | -4.575992000000 |
| H | -3.343603000000 | -1.284382000000 | -2.878677000000 |

**TS<sub>13/14</sub>**

|    |                     |                     |                     |
|----|---------------------|---------------------|---------------------|
| Fe | 0.5404850000000000  | 0.1202640000000000  | -1.4235210000000000 |
| P  | 0.6029310000000000  | 2.2489580000000000  | -0.8623160000000000 |
| C  | -0.2438310000000000 | 3.3454410000000000  | -2.0979570000000000 |
| H  | 0.2554740000000000  | 3.1547020000000000  | -3.0612100000000000 |
| H  | -1.2588450000000000 | 2.9299140000000000  | -2.2107000000000000 |
| C  | -0.3025880000000000 | 4.8389750000000000  | -1.8193670000000000 |
| H  | 0.7006390000000000  | 5.2841260000000000  | -1.7386190000000000 |
| H  | -0.8240410000000000 | 5.3620090000000000  | -2.6361330000000000 |
| H  | -0.8453580000000000 | 5.0659190000000000  | -0.8897370000000000 |
| C  | -0.1967590000000000 | 2.8047660000000000  | 0.7168090000000000  |
| H  | -1.2864650000000000 | 2.7772140000000000  | 0.5633520000000000  |
| H  | 0.0715280000000000  | 3.8650680000000000  | 0.8542050000000000  |
| C  | 0.1801310000000000  | 2.0055160000000000  | 1.9531660000000000  |
| H  | -0.1695060000000000 | 0.9654080000000000  | 1.8832740000000000  |
| H  | 1.2675570000000000  | 1.9786440000000000  | 2.1037930000000000  |
| H  | -0.2787180000000000 | 2.4476240000000000  | 2.8509630000000000  |
| C  | 2.2491410000000000  | 3.0675100000000000  | -0.6512020000000000 |
| H  | 2.0716850000000000  | 4.1410030000000000  | -0.4750490000000000 |
| H  | 2.6523580000000000  | 2.6386910000000000  | 0.2767370000000000  |
| C  | 3.2456250000000000  | 2.8542830000000000  | -1.7756930000000000 |
| H  | 2.8865100000000000  | 3.2562150000000000  | -2.7366950000000000 |
| H  | 4.1979980000000000  | 3.3581940000000000  | -1.5485840000000000 |
| H  | 3.4572880000000000  | 1.7837930000000000  | -1.9077680000000000 |
| B  | 1.9314400000000000  | -0.3891650000000000 | -0.1121110000000000 |
| O  | 2.2037440000000000  | -1.7328870000000000 | 0.1380570000000000  |
| O  | 2.8249940000000000  | 0.3928510000000000  | 0.6122300000000000  |
| C  | 3.4622190000000000  | -1.8394040000000000 | 0.8107490000000000  |

|                           |                    |                    |                    |
|---------------------------|--------------------|--------------------|--------------------|
| C                         | 3.576926000000000  | -0.442956000000000 | 1.503668000000000  |
| C                         | 3.421024000000000  | -3.025186000000000 | 1.756508000000000  |
| C                         | 4.531877000000000  | -2.057280000000000 | -0.254875000000000 |
| C                         | 4.988303000000000  | 0.102341000000000  | 1.618900000000000  |
| C                         | 2.888754000000000  | -0.405572000000000 | 2.863554000000000  |
| H                         | 3.336379000000000  | -3.956124000000000 | 1.176816000000000  |
| H                         | 4.340469000000000  | -3.081850000000000 | 2.358936000000000  |
| H                         | 2.558604000000000  | -2.969454000000000 | 2.433007000000000  |
| H                         | 4.255632000000000  | -2.933181000000000 | -0.859658000000000 |
| H                         | 4.605542000000000  | -1.188869000000000 | -0.925690000000000 |
| H                         | 5.522094000000000  | -2.239010000000000 | 0.187379000000000  |
| H                         | 5.619728000000000  | -0.566953000000000 | 2.222822000000000  |
| H                         | 5.453142000000000  | 0.229813000000000  | 0.632907000000000  |
| H                         | 4.966813000000000  | 1.085197000000000  | 2.112566000000000  |
| H                         | 1.861728000000000  | -0.793009000000000 | 2.798132000000000  |
| H                         | 3.439279000000000  | -0.991760000000000 | 3.613338000000000  |
| H                         | 2.838187000000000  | 0.635175000000000  | 3.214169000000000  |
| C                         | 1.893483000000000  | -0.656478000000000 | -2.782819000000000 |
| C                         | 0.873980000000000  | -1.627344000000000 | -2.532871000000000 |
| H                         | 2.963174000000000  | -0.795225000000000 | -2.636743000000000 |
| C                         | 1.269676000000000  | 0.496263000000000  | -3.331862000000000 |
| C                         | -0.362207000000000 | -1.056267000000000 | -2.929740000000000 |
| H                         | 1.023414000000000  | -2.608939000000000 | -2.090235000000000 |
| H                         | 1.783941000000000  | 1.398929000000000  | -3.654364000000000 |
| C                         | -0.136128000000000 | 0.248382000000000  | -3.428618000000000 |
| H                         | -1.337105000000000 | -1.529105000000000 | -2.822091000000000 |
| H                         | -0.889422000000000 | 0.928834000000000  | -3.820206000000000 |
| C                         | -2.247647000000000 | 0.356425000000000  | -0.367585000000000 |
| C                         | -1.088587000000000 | -0.437436000000000 | -0.313464000000000 |
| C                         | -1.228868000000000 | -1.744540000000000 | 0.189677000000000  |
| C                         | -2.467990000000000 | -2.250308000000000 | 0.579155000000000  |
| C                         | -3.609201000000000 | -1.454087000000000 | 0.490019000000000  |
| C                         | -3.490280000000000 | -0.147629000000000 | 0.014944000000000  |
| H                         | -2.196479000000000 | 1.374577000000000  | -0.756224000000000 |
| H                         | 0.194799000000000  | -0.152038000000000 | 0.020754000000000  |
| H                         | -0.334142000000000 | -2.368474000000000 | 0.272713000000000  |
| H                         | -2.541160000000000 | -3.273346000000000 | 0.958340000000000  |
| H                         | -4.583602000000000 | -1.845666000000000 | 0.792437000000000  |
| H                         | -4.377177000000000 | 0.487153000000000  | -0.066145000000000 |
| <b>TS<sub>14/15</sub></b> |                    |                    |                    |
| Fe                        | 1.051750000000000  | 0.508524000000000  | -1.470411000000000 |
| P                         | 0.188642000000000  | 2.372808000000000  | -0.644975000000000 |
| C                         | -0.853122000000000 | 3.341028000000000  | -1.823292000000000 |
| H                         | -0.261896000000000 | 3.440578000000000  | -2.747021000000000 |

|   |                    |                    |                    |
|---|--------------------|--------------------|--------------------|
| H | -1.693183000000000 | 2.673534000000000  | -2.072366000000000 |
| C | -1.358376000000000 | 4.701107000000000  | -1.368245000000000 |
| H | -0.533864000000000 | 5.400304000000000  | -1.162536000000000 |
| H | -1.983389000000000 | 5.156712000000000  | -2.151670000000000 |
| H | -1.975840000000000 | 4.632886000000000  | -0.460521000000000 |
| C | -0.890419000000000 | 2.232796000000000  | 0.843432000000000  |
| H | -1.736297000000000 | 1.596536000000000  | 0.542144000000000  |
| H | -1.290455000000000 | 3.234975000000000  | 1.067589000000000  |
| C | -0.196708000000000 | 1.648440000000000  | 2.064927000000000  |
| H | 0.258282000000000  | 0.673373000000000  | 1.844015000000000  |
| H | 0.589988000000000  | 2.315289000000000  | 2.450492000000000  |
| H | -0.923461000000000 | 1.497966000000000  | 2.877611000000000  |
| C | 1.422980000000000  | 3.613162000000000  | -0.037074000000000 |
| H | 0.864132000000000  | 4.456921000000000  | 0.401181000000000  |
| H | 1.945405000000000  | 3.122635000000000  | 0.800167000000000  |
| C | 2.436173000000000  | 4.104240000000000  | -1.056245000000000 |
| H | 1.952775000000000  | 4.582659000000000  | -1.922768000000000 |
| H | 3.109231000000000  | 4.849483000000000  | -0.605490000000000 |
| H | 3.055934000000000  | 3.276154000000000  | -1.428255000000000 |
| B | 2.282064000000000  | -0.427865000000000 | -0.023874000000000 |
| O | 1.940848000000000  | -1.075611000000000 | 1.144634000000000  |
| O | 3.622462000000000  | -0.636680000000000 | -0.306474000000000 |
| C | 2.988095000000000  | -2.000329000000000 | 1.471389000000000  |
| C | 4.224302000000000  | -1.316565000000000 | 0.802595000000000  |
| C | 3.067995000000000  | -2.141292000000000 | 2.978859000000000  |
| C | 2.629231000000000  | -3.336457000000000 | 0.831013000000000  |
| C | 5.281035000000000  | -2.273119000000000 | 0.284654000000000  |
| C | 4.860200000000000  | -0.251560000000000 | 1.689110000000000  |
| H | 2.153875000000000  | -2.623341000000000 | 3.354658000000000  |
| H | 3.926172000000000  | -2.767245000000000 | 3.266234000000000  |
| H | 3.162934000000000  | -1.164830000000000 | 3.470556000000000  |
| H | 1.639350000000000  | -3.650916000000000 | 1.191317000000000  |
| H | 2.574987000000000  | -3.250508000000000 | -0.264046000000000 |
| H | 3.357018000000000  | -4.119385000000000 | 1.087552000000000  |
| H | 5.698671000000000  | -2.875920000000000 | 1.105130000000000  |
| H | 4.872784000000000  | -2.949978000000000 | -0.476743000000000 |
| H | 6.103621000000000  | -1.704389000000000 | -0.172962000000000 |
| H | 4.099086000000000  | 0.434759000000000  | 2.088676000000000  |
| H | 5.410185000000000  | -0.694467000000000 | 2.531789000000000  |
| H | 5.566394000000000  | 0.336169000000000  | 1.084970000000000  |
| C | 2.755481000000000  | 0.530086000000000  | -2.728955000000000 |
| C | 2.139611000000000  | -0.765357000000000 | -2.720074000000000 |
| H | 3.763538000000000  | 0.747049000000000  | -2.383464000000000 |
| C | 1.809310000000000  | 1.459602000000000  | -3.200757000000000 |



|                              |                     |                     |                     |
|------------------------------|---------------------|---------------------|---------------------|
| C                            | 0.8180620000000000  | -0.6154360000000000 | -3.2117700000000000 |
| H                            | 2.6217840000000000  | -1.6996310000000000 | -2.4450000000000000 |
| H                            | 1.9759800000000000  | 2.5262990000000000  | -3.3361180000000000 |
| C                            | 0.5996370000000000  | 0.7561260000000000  | -3.4971850000000000 |
| H                            | 0.0821710000000000  | -1.4105910000000000 | -3.3088590000000000 |
| H                            | -0.3117930000000000 | 1.1898820000000000  | -3.9021960000000000 |
| C                            | -1.8217540000000000 | -0.1006770000000000 | -1.6145020000000000 |
| C                            | -0.6539160000000000 | -0.3610170000000000 | -0.8564090000000000 |
| C                            | -0.8673080000000000 | -1.2157460000000000 | 0.2442280000000000  |
| C                            | -2.1227740000000000 | -1.7344200000000000 | 0.5770810000000000  |
| C                            | -3.2483740000000000 | -1.4328790000000000 | -0.1850280000000000 |
| C                            | -3.0821510000000000 | -0.6094170000000000 | -1.2975410000000000 |
| H                            | -1.7615030000000000 | 0.5352580000000000  | -2.5016980000000000 |
| H                            | 1.7903490000000000  | 0.7930950000000000  | -0.1368450000000000 |
| H                            | -0.0270270000000000 | -1.4850510000000000 | 0.8812560000000000  |
| H                            | -2.2152840000000000 | -2.3870480000000000 | 1.4513940000000000  |
| H                            | -4.2311090000000000 | -1.8343810000000000 | 0.0762270000000000  |
| H                            | -3.9399350000000000 | -0.3576890000000000 | -1.9292970000000000 |
| <b>TS<sub>S24/S25a</sub></b> |                     |                     |                     |
| Fe                           | 0.1210430000000000  | -0.0465730000000000 | 0.0047790000000000  |
| P                            | 0.2188450000000000  | 2.1507890000000000  | 0.5858010000000000  |
| C                            | 0.5228780000000000  | 2.4166460000000000  | 2.3999690000000000  |
| H                            | 0.5775820000000000  | 3.5021890000000000  | 2.5829840000000000  |
| H                            | -0.3837350000000000 | 2.0710980000000000  | 2.9198870000000000  |
| C                            | 1.7457070000000000  | 1.7128070000000000  | 2.9556550000000000  |
| H                            | 2.6717230000000000  | 2.0868680000000000  | 2.4942190000000000  |
| H                            | 1.8307510000000000  | 1.8682930000000000  | 4.0421310000000000  |
| H                            | 1.6921690000000000  | 0.6328950000000000  | 2.7611950000000000  |
| C                            | 1.4794760000000000  | 3.3035240000000000  | -0.1355350000000000 |
| H                            | 1.4595970000000000  | 3.1648500000000000  | -1.2257950000000000 |
| H                            | 2.4507560000000000  | 2.8932470000000000  | 0.1837730000000000  |
| C                            | 1.3719230000000000  | 4.7788280000000000  | 0.2151410000000000  |
| H                            | 2.2090150000000000  | 5.3370910000000000  | -0.2318830000000000 |
| H                            | 0.4427870000000000  | 5.2270510000000000  | -0.1676070000000000 |
| H                            | 1.4074470000000000  | 4.9590550000000000  | 1.3002580000000000  |
| C                            | -1.3652410000000000 | 3.1094240000000000  | 0.4833510000000000  |
| H                            | -2.0888410000000000 | 2.5366340000000000  | 1.0853190000000000  |
| H                            | -1.2066360000000000 | 4.0564730000000000  | 1.0250650000000000  |
| C                            | -1.9361050000000000 | 3.3790200000000000  | -0.8980380000000000 |
| H                            | -1.2552080000000000 | 3.9886250000000000  | -1.5121120000000000 |
| H                            | -2.1302630000000000 | 2.4483500000000000  | -1.4492870000000000 |
| H                            | -2.8849200000000000 | 3.9315850000000000  | -0.8171450000000000 |
| B                            | 2.5476820000000000  | 0.1915680000000000  | -1.1365100000000000 |
| O                            | 3.3941920000000000  | -0.7428450000000000 | -1.6799930000000000 |

|                              |                    |                    |                    |
|------------------------------|--------------------|--------------------|--------------------|
| O                            | 2.255981000000000  | -0.132518000000000 | 0.209927000000000  |
| C                            | 3.681455000000000  | -1.760939000000000 | -0.720084000000000 |
| C                            | 3.287320000000000  | -1.068195000000000 | 0.630088000000000  |
| C                            | 2.845945000000000  | -2.995703000000000 | -1.026587000000000 |
| C                            | 5.156346000000000  | -2.112395000000000 | -0.832145000000000 |
| C                            | 4.417707000000000  | -0.210045000000000 | 1.188873000000000  |
| C                            | 2.788767000000000  | -2.016680000000000 | 1.696278000000000  |
| H                            | 2.994317000000000  | -3.271112000000000 | -2.080249000000000 |
| H                            | 3.145449000000000  | -3.846975000000000 | -0.398556000000000 |
| H                            | 1.779660000000000  | -2.800890000000000 | -0.868689000000000 |
| H                            | 5.338471000000000  | -2.604768000000000 | -1.798265000000000 |
| H                            | 5.790086000000000  | -1.218029000000000 | -0.785791000000000 |
| H                            | 5.458805000000000  | -2.806609000000000 | -0.033607000000000 |
| H                            | 5.249505000000000  | -0.829576000000000 | 1.551113000000000  |
| H                            | 4.804144000000000  | 0.482908000000000  | 0.427404000000000  |
| H                            | 4.038667000000000  | 0.382413000000000  | 2.031139000000000  |
| H                            | 2.519798000000000  | -1.462668000000000 | 2.606469000000000  |
| H                            | 1.919267000000000  | -2.593093000000000 | 1.366719000000000  |
| H                            | 3.592039000000000  | -2.721220000000000 | 1.958622000000000  |
| C                            | -1.962603000000000 | -0.214119000000000 | 0.214120000000000  |
| C                            | -1.465476000000000 | -1.340111000000000 | -0.484810000000000 |
| H                            | -2.696305000000000 | 0.496513000000000  | -0.159982000000000 |
| C                            | -1.358219000000000 | -0.224700000000000 | 1.512407000000000  |
| C                            | -0.547316000000000 | -2.030227000000000 | 0.343956000000000  |
| H                            | -1.723435000000000 | -1.605844000000000 | -1.507168000000000 |
| H                            | -1.553782000000000 | 0.480480000000000  | 2.317689000000000  |
| C                            | -0.486447000000000 | -1.328181000000000 | 1.589878000000000  |
| H                            | -0.035114000000000 | -2.957383000000000 | 0.094830000000000  |
| H                            | 0.111638000000000  | -1.596906000000000 | 2.457637000000000  |
| C                            | 0.087120000000000  | 1.262190000000000  | -2.748783000000000 |
| C                            | 0.378729000000000  | 0.092244000000000  | -2.013487000000000 |
| C                            | 0.487301000000000  | -1.069579000000000 | -2.809324000000000 |
| C                            | 0.324899000000000  | -1.075076000000000 | -4.195678000000000 |
| C                            | 0.023787000000000  | 0.105623000000000  | -4.870768000000000 |
| C                            | -0.096323000000000 | 1.281803000000000  | -4.130232000000000 |
| H                            | 0.006905000000000  | 2.216441000000000  | -2.227553000000000 |
| H                            | 2.558997000000000  | 1.307749000000000  | -1.565503000000000 |
| H                            | 0.711370000000000  | -2.025824000000000 | -2.332636000000000 |
| H                            | 0.430426000000000  | -2.012734000000000 | -4.749677000000000 |
| H                            | -0.109899000000000 | 0.111677000000000  | -5.955777000000000 |
| H                            | -0.330024000000000 | 2.225202000000000  | -4.633174000000000 |
| <b>TS<sub>S24/S25b</sub></b> |                    |                    |                    |
| Fe                           | -0.002353000000    | -0.278953000000    | -0.561248000000    |
| P                            | 0.192747000000     | 1.132536000000     | 1.244001000000     |

|   |                 |                 |                 |
|---|-----------------|-----------------|-----------------|
| C | 1.397146000000  | 2.541709000000  | 1.404521000000  |
| H | 2.405035000000  | 2.103069000000  | 1.370158000000  |
| H | 1.299177000000  | 3.137402000000  | 0.487236000000  |
| C | 1.265513000000  | 3.435047000000  | 2.629516000000  |
| H | 2.042045000000  | 4.215417000000  | 2.605526000000  |
| H | 0.294637000000  | 3.950741000000  | 2.667089000000  |
| H | 1.390344000000  | 2.883946000000  | 3.573196000000  |
| C | -1.383684000000 | 2.095755000000  | 1.455135000000  |
| H | -1.366771000000 | 2.562352000000  | 2.453318000000  |
| H | -2.220257000000 | 1.384305000000  | 1.467923000000  |
| C | -1.600353000000 | 3.143978000000  | 0.373226000000  |
| H | -1.508630000000 | 2.709526000000  | -0.632638000000 |
| H | -2.599948000000 | 3.595745000000  | 0.465873000000  |
| H | -0.864438000000 | 3.959121000000  | 0.439942000000  |
| C | 0.439239000000  | 0.391272000000  | 2.942224000000  |
| H | 1.518383000000  | 0.497993000000  | 3.142621000000  |
| H | -0.066210000000 | 1.047470000000  | 3.668828000000  |
| C | 0.034906000000  | -1.054964000000 | 3.163515000000  |
| H | 0.530603000000  | -1.723020000000 | 2.444759000000  |
| H | 0.320343000000  | -1.377727000000 | 4.176720000000  |
| H | -1.048888000000 | -1.210013000000 | 3.067916000000  |
| B | 1.811816000000  | -0.535393000000 | -2.228241000000 |
| O | 1.773691000000  | -1.219193000000 | -0.971216000000 |
| O | 3.145283000000  | -0.187899000000 | -2.473079000000 |
| C | 3.099743000000  | -1.394897000000 | -0.444665000000 |
| C | 3.987564000000  | -1.027011000000 | -1.695380000000 |
| C | 3.313163000000  | -0.472083000000 | 0.738214000000  |
| C | 3.216288000000  | -2.836974000000 | 0.022763000000  |
| C | 4.332220000000  | -2.247676000000 | -2.548225000000 |
| C | 5.260607000000  | -0.270523000000 | -1.355214000000 |
| H | 4.292616000000  | -0.647731000000 | 1.204329000000  |
| H | 3.256282000000  | 0.580573000000  | 0.442015000000  |
| H | 2.536520000000  | -0.666234000000 | 1.489587000000  |
| H | 2.927889000000  | -3.541901000000 | -0.766479000000 |
| H | 4.243861000000  | -3.065138000000 | 0.342704000000  |
| H | 2.548462000000  | -2.998114000000 | 0.882256000000  |
| H | 5.033096000000  | -2.926725000000 | -2.041488000000 |
| H | 3.428016000000  | -2.811783000000 | -2.819006000000 |
| H | 4.798770000000  | -1.898308000000 | -3.480237000000 |
| H | 5.807096000000  | -0.048385000000 | -2.283019000000 |
| H | 5.043681000000  | 0.683944000000  | -0.858996000000 |
| H | 5.917526000000  | -0.867728000000 | -0.705000000000 |
| C | -1.459687000000 | -0.993681000000 | -1.916263000000 |
| C | -0.802404000000 | -2.092689000000 | -1.334342000000 |

|   |                 |                 |                 |
|---|-----------------|-----------------|-----------------|
| H | -1.454292000000 | -0.762284000000 | -2.978812000000 |
| C | -2.076842000000 | -0.233117000000 | -0.880587000000 |
| C | -1.001649000000 | -2.048384000000 | 0.073943000000  |
| H | -0.181185000000 | -2.809675000000 | -1.867165000000 |
| H | -2.685710000000 | 0.660257000000  | -1.003126000000 |
| C | -1.795226000000 | -0.907633000000 | 0.343200000000  |
| H | -0.623548000000 | -2.761588000000 | 0.802240000000  |
| H | -2.152562000000 | -0.614460000000 | 1.327320000000  |
| C | -0.099337000000 | 2.986351000000  | -3.428417000000 |
| C | -0.237803000000 | 1.746950000000  | -2.808613000000 |
| C | 0.673502000000  | 1.250475000000  | -1.843540000000 |
| C | 1.769832000000  | 2.104688000000  | -1.609114000000 |
| C | 1.942847000000  | 3.342254000000  | -2.229804000000 |
| C | 0.995140000000  | 3.802450000000  | -3.138903000000 |
| H | -0.851805000000 | 3.315639000000  | -4.150845000000 |
| H | -1.108581000000 | 1.155663000000  | -3.094110000000 |
| H | 1.120043000000  | -0.909155000000 | -3.149600000000 |
| H | 2.558161000000  | 1.778039000000  | -0.930113000000 |
| H | 2.826469000000  | 3.944951000000  | -2.000728000000 |
| H | 1.114439000000  | 4.772043000000  | -3.629362000000 |

## 12. DFT-optimized cartesian coordinates of all species involved in the SET-triggered deaminative cross-coupling reaction

18

|   |                     |                     |                     |
|---|---------------------|---------------------|---------------------|
| C | -3.2749890000000000 | -0.0944610000000000 | -0.1215220000000000 |
| C | -4.2211800000000000 | -0.8365070000000000 | -0.8595620000000000 |
| C | -5.5647030000000000 | -0.4786210000000000 | -0.8918530000000000 |
| C | -6.0213390000000000 | 0.6257290000000000  | -0.1603940000000000 |
| C | -5.1091370000000000 | 1.3484810000000000  | 0.6106080000000000  |
| C | -3.7590080000000000 | 0.9903660000000000  | 0.6362250000000000  |
| H | -3.8581670000000000 | -1.7028530000000000 | -1.4020130000000000 |
| H | -6.2651990000000000 | -1.0625940000000000 | -1.4851000000000000 |
| H | -7.0714720000000000 | 0.9048690000000000  | -0.1793810000000000 |
| H | -5.4511090000000000 | 2.1867080000000000  | 1.2136720000000000  |
| H | -3.0911320000000000 | 1.5332610000000000  | 1.2973070000000000  |
| C | -1.8544400000000000 | -0.5529490000000000 | -0.1775730000000000 |
| O | -1.6456820000000000 | -1.8118150000000000 | -0.4167490000000000 |
| C | -0.8364940000000000 | 0.3679460000000000  | 0.0142690000000000  |
| S | -0.9522740000000000 | 2.1642020000000000  | 0.1439940000000000  |
| N | 0.5577550000000000  | 0.0414060000000000  | -0.0531770000000000 |
| C | 0.7718120000000000  | 2.3330210000000000  | -0.3251560000000000 |
| C | 1.3920500000000000  | 1.1331630000000000  | -0.3381440000000000 |
| C | 1.0656860000000000  | -1.2726510000000000 | 0.1841530000000000  |
| C | 1.3019000000000000  | 3.7220090000000000  | -0.5277300000000000 |
| C | 2.8625550000000000  | 0.9317920000000000  | -0.6121400000000000 |
| C | 1.1906160000000000  | -1.7767700000000000 | 1.4981650000000000  |
| C | 1.4943330000000000  | -2.0355890000000000 | -0.9279550000000000 |
| C | 2.8350100000000000  | 3.8675900000000000  | -0.4831500000000000 |
| H | 0.8833730000000000  | 4.3561670000000000  | 0.2713330000000000  |
| H | 0.9182260000000000  | 4.1526120000000000  | -1.4661690000000000 |
| C | 3.8218200000000000  | 1.6434590000000000  | 0.3630910000000000  |
| H | 3.0954600000000000  | -0.1335240000000000 | -0.6012010000000000 |
| H | 3.0708310000000000  | 1.2725900000000000  | -1.6326270000000000 |
| C | 1.7251790000000000  | -3.0641240000000000 | 1.6590860000000000  |
| C | 0.7730980000000000  | -1.0539790000000000 | 2.7780430000000000  |
| C | 2.0381520000000000  | -3.3039660000000000 | -0.7115110000000000 |
| C | 1.3032040000000000  | -1.5400990000000000 | -2.3551430000000000 |
| C | 3.4630340000000000  | 3.1043190000000000  | 0.6940160000000000  |
| H | 3.2792680000000000  | 3.5333560000000000  | -1.4288090000000000 |
| H | 3.0635560000000000  | 4.9370440000000000  | -0.4043740000000000 |
| H | 3.8857600000000000  | 1.0690070000000000  | 1.2944540000000000  |
| H | 4.8216200000000000  | 1.6072900000000000  | -0.0890980000000000 |
| C | 2.1496900000000000  | -3.8258280000000000 | 0.5751530000000000  |
| H | 1.8219840000000000  | -3.4653160000000000 | 2.6654580000000000  |

|   |                    |                    |                    |
|---|--------------------|--------------------|--------------------|
| C | -0.738710000000000 | -1.166794000000000 | 3.047069000000000  |
| C | 1.246717000000000  | 0.401769000000000  | 2.904471000000000  |
| H | 1.272500000000000  | -1.605814000000000 | 3.585831000000000  |
| H | 2.361221000000000  | -3.898627000000000 | -1.561532000000000 |
| C | 0.141520000000000  | -2.300294000000000 | -3.019261000000000 |
| C | 2.583585000000000  | -1.633296000000000 | -3.199619000000000 |
| H | 1.011991000000000  | -0.488192000000000 | -2.305220000000000 |
| H | 4.371035000000000  | 3.615909000000000  | 1.035736000000000  |
| H | 2.761332000000000  | 3.127626000000000  | 1.537074000000000  |
| H | 2.570282000000000  | -4.815633000000000 | 0.732307000000000  |
| H | -0.972391000000000 | -0.766747000000000 | 4.041741000000000  |
| H | -1.304855000000000 | -0.607751000000000 | 2.299100000000000  |
| H | -1.065177000000000 | -2.212245000000000 | 3.014183000000000  |
| H | 0.721636000000000  | 1.069331000000000  | 2.220433000000000  |
| H | 1.066628000000000  | 0.753559000000000  | 3.927862000000000  |
| H | 2.319909000000000  | 0.486570000000000  | 2.705237000000000  |
| H | -0.067832000000000 | -1.889031000000000 | -4.015239000000000 |
| H | 0.393000000000000  | -3.362036000000000 | -3.141374000000000 |
| H | -0.746780000000000 | -2.217801000000000 | -2.384060000000000 |
| H | 3.415404000000000  | -1.090556000000000 | -2.738101000000000 |
| H | 2.899054000000000  | -2.673422000000000 | -3.342153000000000 |
| H | 2.409649000000000  | -1.205604000000000 | -4.194139000000000 |

**19**

|   |                    |                    |                    |
|---|--------------------|--------------------|--------------------|
| C | 0.304470000000000  | 1.325968000000000  | 0.429607000000000  |
| C | -1.029942000000000 | 1.607340000000000  | 0.190765000000000  |
| C | -1.953483000000000 | 0.600955000000000  | -0.128137000000000 |
| C | -1.478675000000000 | -0.716488000000000 | -0.057913000000000 |
| C | -0.141191000000000 | -0.993368000000000 | 0.156101000000000  |
| N | 0.769287000000000  | 0.038822000000000  | 0.262174000000000  |
| H | -1.360012000000000 | 2.625733000000000  | 0.348809000000000  |
| H | -2.149905000000000 | -1.557705000000000 | -0.169944000000000 |
| C | 0.304543000000000  | -2.391227000000000 | 0.316993000000000  |
| C | -0.104199000000000 | -3.371409000000000 | -0.600810000000000 |
| C | 1.069668000000000  | -2.761281000000000 | 1.434478000000000  |
| C | 0.282359000000000  | -4.696878000000000 | -0.422938000000000 |
| H | -0.698080000000000 | -3.085211000000000 | -1.462599000000000 |
| C | 1.445462000000000  | -4.089647000000000 | 1.611484000000000  |
| H | 1.349721000000000  | -2.014936000000000 | 2.171031000000000  |
| C | 1.061694000000000  | -5.056569000000000 | 0.679428000000000  |
| H | -0.022206000000000 | -5.447288000000000 | -1.145285000000000 |
| H | 2.033893000000000  | -4.370148000000000 | 2.479053000000000  |
| H | 1.363888000000000  | -6.090269000000000 | 0.815280000000000  |
| C | 1.164852000000000  | 2.369714000000000  | 1.015599000000000  |
| C | 1.875469000000000  | 2.091346000000000  | 2.194410000000000  |

|           |                     |                     |                     |
|-----------|---------------------|---------------------|---------------------|
| C         | 1.2050570000000000  | 3.6573670000000000  | 0.4637650000000000  |
| C         | 2.6366160000000000  | 3.0884490000000000  | 2.7979830000000000  |
| H         | 1.8211790000000000  | 1.1024930000000000  | 2.6391920000000000  |
| C         | 1.9753310000000000  | 4.6479900000000000  | 1.0680940000000000  |
| H         | 0.6609500000000000  | 3.8689680000000000  | -0.4513030000000000 |
| C         | 2.6937200000000000  | 4.3651330000000000  | 2.2323150000000000  |
| H         | 3.1817810000000000  | 2.8702710000000000  | 3.7107020000000000  |
| H         | 2.0185300000000000  | 5.6389200000000000  | 0.6276530000000000  |
| H         | 3.2935140000000000  | 5.1390800000000000  | 2.7009250000000000  |
| C         | -3.3578480000000000 | 0.9126030000000000  | -0.4286910000000000 |
| C         | -3.6911330000000000 | 2.1378560000000000  | -1.0336810000000000 |
| C         | -4.3844440000000000 | -0.0001280000000000 | -0.1277730000000000 |
| C         | -5.0159610000000000 | 2.4382310000000000  | -1.3355950000000000 |
| H         | -2.9083300000000000 | 2.8417720000000000  | -1.2968800000000000 |
| C         | -5.7093930000000000 | 0.3087730000000000  | -0.4211670000000000 |
| H         | -4.1535070000000000 | -0.9373530000000000 | 0.3671750000000000  |
| C         | -6.0285260000000000 | 1.5261490000000000  | -1.0278470000000000 |
| H         | -5.2579130000000000 | 3.3817480000000000  | -1.8144630000000000 |
| H         | -6.4938490000000000 | -0.3985880000000000 | -0.1715030000000000 |
| H         | -7.0623930000000000 | 1.7633100000000000  | -1.2592770000000000 |
| C         | 2.2302100000000000  | -0.2594200000000000 | -0.0163650000000000 |
| H         | 2.6935560000000000  | -0.6448100000000000 | 0.8891950000000000  |
| C         | 3.0497640000000000  | 0.9193420000000000  | -0.5760860000000000 |
| H         | 3.3469250000000000  | 1.6304410000000000  | 0.1886500000000000  |
| H         | 3.9622960000000000  | 0.4939130000000000  | -1.0036280000000000 |
| H         | 2.5072630000000000  | 1.4343160000000000  | -1.3717310000000000 |
| C         | 2.3754030000000000  | -1.3430290000000000 | -1.0958040000000000 |
| O         | 3.2339250000000000  | -2.1950100000000000 | -1.0508910000000000 |
| O         | 1.5622850000000000  | -1.1170030000000000 | -2.1325970000000000 |
| C         | 1.7079390000000000  | -2.0208250000000000 | -3.2506490000000000 |
| H         | 1.5308580000000000  | -3.0467030000000000 | -2.9221670000000000 |
| H         | 0.9548400000000000  | -1.7094130000000000 | -3.9719660000000000 |
| H         | 2.7114050000000000  | -1.9325610000000000 | -3.6709550000000000 |
| <b>20</b> |                     |                     |                     |
| C         | -1.9097730000000000 | 0.0743550000000000  | 0.5585290000000000  |
| S         | -2.3487960000000000 | 1.7197890000000000  | 0.2385680000000000  |
| N         | -0.6289590000000000 | -0.0293030000000000 | 0.1461030000000000  |
| C         | -0.7989760000000000 | 2.1745400000000000  | -0.4666420000000000 |
| C         | 0.0216750000000000  | 1.0945710000000000  | -0.4390940000000000 |
| C         | 0.0402210000000000  | -1.3101850000000000 | 0.2500930000000000  |
| C         | -0.5529730000000000 | 3.5694680000000000  | -0.9734820000000000 |
| C         | 1.4139330000000000  | 0.9956210000000000  | -1.0042660000000000 |
| C         | 0.6331150000000000  | -1.7012370000000000 | 1.4635640000000000  |
| C         | 0.0646170000000000  | -2.1196390000000000 | -0.9020930000000000 |

|           |                    |                    |                    |
|-----------|--------------------|--------------------|--------------------|
| C         | 0.909345000000000  | 3.891906000000000  | -1.331881000000000 |
| H         | -0.878284000000000 | 4.271537000000000  | -0.193842000000000 |
| H         | -1.201700000000000 | 3.763078000000000  | -1.838441000000000 |
| C         | 2.434452000000000  | 2.010711000000000  | -0.445193000000000 |
| H         | 1.799367000000000  | -0.014039000000000 | -0.848509000000000 |
| H         | 1.342339000000000  | 1.121598000000000  | -2.090898000000000 |
| C         | 1.275227000000000  | -2.948127000000000 | 1.485209000000000  |
| C         | 0.569501000000000  | -0.927669000000000 | 2.778566000000000  |
| C         | 0.714702000000000  | -3.354987000000000 | -0.823831000000000 |
| C         | -0.658108000000000 | -1.693648000000000 | -2.172970000000000 |
| C         | 1.899799000000000  | 3.440430000000000  | -0.244888000000000 |
| H         | 1.173554000000000  | 3.440432000000000  | -2.295648000000000 |
| H         | 0.976248000000000  | 4.975736000000000  | -1.476921000000000 |
| H         | 2.835757000000000  | 1.643205000000000  | 0.505301000000000  |
| H         | 3.277008000000000  | 2.030886000000000  | -1.147046000000000 |
| C         | 1.321219000000000  | -3.766002000000000 | 0.360665000000000  |
| H         | 1.742717000000000  | -3.277185000000000 | 2.409326000000000  |
| C         | -0.781570000000000 | -1.165793000000000 | 3.480361000000000  |
| C         | 0.900873000000000  | 0.570867000000000  | 2.710398000000000  |
| H         | 1.342272000000000  | -1.381015000000000 | 3.412002000000000  |
| H         | 0.746499000000000  | -4.001313000000000 | -1.694279000000000 |
| C         | -2.105996000000000 | -2.218794000000000 | -2.141947000000000 |
| C         | 0.063361000000000  | -2.120584000000000 | -3.458024000000000 |
| H         | -0.712824000000000 | -0.601216000000000 | -2.184873000000000 |
| H         | 2.754851000000000  | 4.124861000000000  | -0.206302000000000 |
| H         | 1.406622000000000  | 3.514491000000000  | 0.732860000000000  |
| H         | 1.828451000000000  | -4.725425000000000 | 0.407162000000000  |
| H         | -0.792837000000000 | -0.669991000000000 | 4.458282000000000  |
| H         | -1.600501000000000 | -0.770693000000000 | 2.871687000000000  |
| H         | -0.955894000000000 | -2.236227000000000 | 3.636212000000000  |
| H         | 0.110545000000000  | 1.157693000000000  | 2.237768000000000  |
| H         | 1.031710000000000  | 0.953979000000000  | 3.728723000000000  |
| H         | 1.832308000000000  | 0.747594000000000  | 2.164628000000000  |
| H         | -2.655923000000000 | -1.882399000000000 | -3.028541000000000 |
| H         | -2.117404000000000 | -3.315104000000000 | -2.126784000000000 |
| H         | -2.626515000000000 | -1.855581000000000 | -1.249807000000000 |
| H         | 1.105486000000000  | -1.782802000000000 | -3.461018000000000 |
| H         | 0.057465000000000  | -3.207994000000000 | -3.590927000000000 |
| H         | -0.440450000000000 | -1.683682000000000 | -4.326944000000000 |
| <b>21</b> |                    |                    |                    |
| C         | -0.632017000000000 | 1.160767000000000  | -0.000355000000000 |
| C         | 0.767814000000000  | 1.194468000000000  | -0.016873000000000 |
| C         | 1.490225000000000  | -0.003815000000000 | 0.000076000000000  |
| C         | 0.761386000000000  | -1.198212000000000 | 0.017028000000000  |



|   |                    |                    |                    |
|---|--------------------|--------------------|--------------------|
| C | -0.638257000000000 | -1.157021000000000 | 0.000365000000000  |
| N | -1.316130000000000 | 0.003707000000000  | -0.000050000000000 |
| H | 1.292322000000000  | 2.141817000000000  | -0.034667000000000 |
| H | 1.280835000000000  | -2.148344000000000 | 0.034877000000000  |
| C | -1.451969000000000 | -2.400346000000000 | 0.000672000000000  |
| C | -0.939449000000000 | -3.615822000000000 | -0.479683000000000 |
| C | -2.768856000000000 | -2.371400000000000 | 0.486744000000000  |
| C | -1.719260000000000 | -4.771574000000000 | -0.465469000000000 |
| H | 0.063908000000000  | -3.658729000000000 | -0.891095000000000 |
| C | -3.546283000000000 | -3.527032000000000 | 0.504044000000000  |
| H | -3.166893000000000 | -1.431920000000000 | 0.853301000000000  |
| C | -3.024423000000000 | -4.732986000000000 | 0.028989000000000  |
| H | -1.308362000000000 | -5.701126000000000 | -0.848639000000000 |
| H | -4.560544000000000 | -3.487872000000000 | 0.891164000000000  |
| H | -3.630926000000000 | -5.633908000000000 | 0.040987000000000  |
| C | -1.439031000000000 | 2.408435000000000  | -0.000707000000000 |
| C | -0.920340000000000 | 3.621024000000000  | 0.480302000000000  |
| C | -2.755756000000000 | 2.386578000000000  | -0.487532000000000 |
| C | -1.694065000000000 | 4.780860000000000  | 0.466060000000000  |
| H | 0.083020000000000  | 3.658496000000000  | 0.892255000000000  |
| C | -3.527107000000000 | 3.546269000000000  | -0.504858000000000 |
| H | -3.158351000000000 | 1.449285000000000  | -0.854677000000000 |
| C | -2.999162000000000 | 4.749288000000000  | -0.029085000000000 |
| H | -1.278501000000000 | 5.708118000000000  | 0.849751000000000  |
| H | -4.541344000000000 | 3.512577000000000  | -0.892555000000000 |
| H | -3.600922000000000 | 5.653386000000000  | -0.041076000000000 |
| C | 2.972055000000000  | -0.007774000000000 | 0.000051000000000  |
| C | 3.686008000000000  | -0.985035000000000 | 0.711981000000000  |
| C | 3.691183000000000  | 0.965670000000000  | -0.711903000000000 |
| C | 5.079796000000000  | -0.987352000000000 | 0.713333000000000  |
| H | 3.146910000000000  | -1.731237000000000 | 1.287521000000000  |
| C | 5.084963000000000  | 0.960542000000000  | -0.713313000000000 |
| H | 3.156057000000000  | 1.714758000000000  | -1.287406000000000 |
| C | 5.784358000000000  | -0.015276000000000 | -0.000003000000000 |
| H | 5.615575000000000  | -1.745192000000000 | 1.277340000000000  |
| H | 5.624760000000000  | 1.715513000000000  | -1.277338000000000 |
| H | 6.870332000000000  | -0.018168000000000 | -0.000033000000000 |

**22R**

|   |                    |                    |                    |
|---|--------------------|--------------------|--------------------|
| C | -0.738643000000000 | -0.178807000000000 | 0.731542000000000  |
| C | -1.240010000000000 | -0.113165000000000 | -0.578498000000000 |
| C | -2.561028000000000 | 0.268424000000000  | -0.807589000000000 |
| C | -3.395551000000000 | 0.585569000000000  | 0.265641000000000  |
| C | -2.905750000000000 | 0.521888000000000  | 1.574006000000000  |
| C | -1.587754000000000 | 0.143153000000000  | 1.803516000000000  |

|            |                    |                    |                    |
|------------|--------------------|--------------------|--------------------|
| H          | -0.614151000000000 | -0.353835000000000 | -1.429202000000000 |
| H          | -2.937272000000000 | 0.317154000000000  | -1.824684000000000 |
| H          | -4.424491000000000 | 0.881740000000000  | 0.084139000000000  |
| H          | -3.552715000000000 | 0.768531000000000  | 2.410425000000000  |
| H          | -1.190075000000000 | 0.090045000000000  | 2.810835000000000  |
| C          | 0.665406000000000  | -0.569645000000000 | 1.054575000000000  |
| O          | 1.060243000000000  | -0.590828000000000 | 2.213288000000000  |
| C          | 1.627445000000000  | -1.007516000000000 | -0.061687000000000 |
| C          | 1.281049000000000  | -2.396521000000000 | -0.615855000000000 |
| C          | 1.769943000000000  | 0.035556000000000  | -1.160196000000000 |
| H          | 1.276889000000000  | -3.128367000000000 | 0.196721000000000  |
| H          | 0.300337000000000  | -2.410939000000000 | -1.097046000000000 |
| H          | 2.028476000000000  | -2.697347000000000 | -1.353993000000000 |
| O          | 1.792808000000000  | -0.193719000000000 | -2.353082000000000 |
| O          | 1.886772000000000  | 1.264092000000000  | -0.629976000000000 |
| C          | 2.009470000000000  | 2.350427000000000  | -1.570647000000000 |
| H          | 2.095465000000000  | 3.250889000000000  | -0.964470000000000 |
| H          | 2.898227000000000  | 2.216019000000000  | -2.190642000000000 |
| H          | 1.121986000000000  | 2.396954000000000  | -2.205895000000000 |
| H          | 2.603911000000000  | -1.056959000000000 | 0.433383000000000  |
| <b>22S</b> |                    |                    |                    |
| C          | 1.122412000000000  | -0.819499000000000 | 0.023692000000000  |
| C          | 1.279860000000000  | 0.521738000000000  | -0.361138000000000 |
| C          | 2.537577000000000  | 1.121599000000000  | -0.322168000000000 |
| C          | 3.650397000000000  | 0.390640000000000  | 0.097502000000000  |
| C          | 3.503908000000000  | -0.946185000000000 | 0.481271000000000  |
| C          | 2.249514000000000  | -1.544833000000000 | 0.444857000000000  |
| H          | 0.433328000000000  | 1.111699000000000  | -0.690697000000000 |
| H          | 2.646911000000000  | 2.159670000000000  | -0.620305000000000 |
| H          | 4.629165000000000  | 0.860282000000000  | 0.125907000000000  |
| H          | 4.367896000000000  | -1.516746000000000 | 0.808343000000000  |
| H          | 2.116466000000000  | -2.579506000000000 | 0.740612000000000  |
| C          | -0.192311000000000 | -1.526385000000000 | 0.017389000000000  |
| O          | -0.280832000000000 | -2.690150000000000 | 0.387317000000000  |
| C          | -1.452707000000000 | -0.820978000000000 | -0.508880000000000 |
| C          | -1.434762000000000 | -0.661250000000000 | -2.035499000000000 |
| C          | -1.738457000000000 | 0.490570000000000  | 0.207584000000000  |
| H          | -0.619217000000000 | -0.015131000000000 | -2.368548000000000 |
| H          | -2.377357000000000 | -0.223445000000000 | -2.372867000000000 |
| H          | -1.314096000000000 | -1.639945000000000 | -2.508271000000000 |
| O          | -2.093578000000000 | 1.523276000000000  | -0.324810000000000 |
| O          | -1.561138000000000 | 0.351686000000000  | 1.531738000000000  |
| C          | -1.785881000000000 | 1.533240000000000  | 2.327730000000000  |
| H          | -1.097806000000000 | 2.325559000000000  | 2.024335000000000  |

|           |                    |                    |                    |
|-----------|--------------------|--------------------|--------------------|
| H         | -1.594322000000000 | 1.231027000000000  | 3.356159000000000  |
| H         | -2.815776000000000 | 1.877301000000000  | 2.212152000000000  |
| H         | -2.269811000000000 | -1.497062000000000 | -0.232838000000000 |
| <b>23</b> |                    |                    |                    |
| C         | -0.487007000000000 | 1.338203000000000  | 0.035315000000000  |
| C         | -1.798444000000000 | 0.947029000000000  | -0.080018000000000 |
| C         | -2.196623000000000 | -0.413845000000000 | -0.146144000000000 |
| C         | -1.152616000000000 | -1.358123000000000 | 0.061675000000000  |
| C         | 0.159113000000000  | -0.988036000000000 | 0.181765000000000  |
| N         | 0.548619000000000  | 0.367605000000000  | 0.044455000000000  |
| H         | -2.555491000000000 | 1.719841000000000  | -0.018698000000000 |
| H         | -1.379319000000000 | -2.411542000000000 | 0.178543000000000  |
| C         | 1.203123000000000  | -1.981329000000000 | 0.503797000000000  |
| C         | 2.090349000000000  | -1.770535000000000 | 1.572862000000000  |
| C         | 1.291590000000000  | -3.182101000000000 | -0.220268000000000 |
| C         | 3.046237000000000  | -2.730444000000000 | 1.898831000000000  |
| H         | 2.022879000000000  | -0.852145000000000 | 2.144456000000000  |
| C         | 2.249015000000000  | -4.140581000000000 | 0.107182000000000  |
| H         | 0.614577000000000  | -3.349507000000000 | -1.052815000000000 |
| C         | 3.132855000000000  | -3.917036000000000 | 1.165379000000000  |
| H         | 3.719950000000000  | -2.555222000000000 | 2.732844000000000  |
| H         | 2.310237000000000  | -5.058807000000000 | -0.469739000000000 |
| H         | 3.882611000000000  | -4.661075000000000 | 1.417544000000000  |
| C         | -0.112554000000000 | 2.748093000000000  | 0.229957000000000  |
| C         | 0.991343000000000  | 3.102339000000000  | 1.030226000000000  |
| C         | -0.867506000000000 | 3.779466000000000  | -0.361970000000000 |
| C         | 1.311721000000000  | 4.441296000000000  | 1.243692000000000  |
| H         | 1.599164000000000  | 2.320902000000000  | 1.471585000000000  |
| C         | -0.547178000000000 | 5.115716000000000  | -0.139191000000000 |
| H         | -1.696667000000000 | 3.527723000000000  | -1.015878000000000 |
| C         | 0.543706000000000  | 5.455408000000000  | 0.666330000000000  |
| H         | 2.164136000000000  | 4.693227000000000  | 1.868605000000000  |
| H         | -1.142023000000000 | 5.894594000000000  | -0.607858000000000 |
| H         | 0.796974000000000  | 6.498193000000000  | 0.833486000000000  |
| C         | -3.594053000000000 | -0.804354000000000 | -0.317693000000000 |
| C         | -4.533306000000000 | 0.089180000000000  | -0.881796000000000 |
| C         | -4.064771000000000 | -2.081872000000000 | 0.061647000000000  |
| C         | -5.866654000000000 | -0.272210000000000 | -1.048973000000000 |
| H         | -4.206770000000000 | 1.067766000000000  | -1.219134000000000 |
| C         | -5.398124000000000 | -2.441093000000000 | -0.110175000000000 |
| H         | -3.386944000000000 | -2.794080000000000 | 0.520494000000000  |
| C         | -6.312270000000000 | -1.540476000000000 | -0.665283000000000 |
| H         | -6.560393000000000 | 0.437456000000000  | -1.491758000000000 |
| H         | -5.727997000000000 | -3.429112000000000 | 0.199646000000000  |

|           |                    |                    |                    |
|-----------|--------------------|--------------------|--------------------|
| H         | -7.352355000000000 | -1.822882000000000 | -0.798422000000000 |
| C         | 1.677897000000000  | 0.636026000000000  | -0.896303000000000 |
| H         | 1.676321000000000  | 1.718472000000000  | -1.038809000000000 |
| C         | 1.456666000000000  | -0.028657000000000 | -2.254920000000000 |
| H         | 1.511266000000000  | -1.116733000000000 | -2.187920000000000 |
| H         | 0.469088000000000  | 0.254029000000000  | -2.632056000000000 |
| H         | 2.212972000000000  | 0.309971000000000  | -2.967835000000000 |
| C         | 3.037427000000000  | 0.363850000000000  | -0.244912000000000 |
| O         | 3.412433000000000  | 0.899189000000000  | 0.780810000000000  |
| O         | 3.792914000000000  | -0.471216000000000 | -0.967060000000000 |
| C         | 5.103234000000000  | -0.750705000000000 | -0.435682000000000 |
| H         | 5.570124000000000  | -1.421829000000000 | -1.155123000000000 |
| H         | 5.677398000000000  | 0.173162000000000  | -0.338245000000000 |
| H         | 5.010325000000000  | -1.234346000000000 | 0.538455000000000  |
| <b>24</b> |                    |                    |                    |
| C         | 3.211090000000000  | 0.098675000000000  | 0.010497000000000  |
| C         | 3.590657000000000  | -0.682314000000000 | 1.112386000000000  |
| C         | 4.926887000000000  | -1.039293000000000 | 1.301281000000000  |
| C         | 5.900382000000000  | -0.622291000000000 | 0.391831000000000  |
| C         | 5.533662000000000  | 0.170618000000000  | -0.700177000000000 |
| C         | 4.202402000000000  | 0.537325000000000  | -0.881199000000000 |
| H         | 2.846133000000000  | -0.989156000000000 | 1.839862000000000  |
| H         | 5.207336000000000  | -1.635157000000000 | 2.165236000000000  |
| H         | 6.939225000000000  | -0.904569000000000 | 0.536676000000000  |
| H         | 6.287646000000000  | 0.504759000000000  | -1.407462000000000 |
| H         | 3.910817000000000  | 1.166844000000000  | -1.716023000000000 |
| C         | 1.805855000000000  | 0.572025000000000  | -0.215472000000000 |
| O         | 1.616116000000000  | 1.776147000000000  | -0.535563000000000 |
| C         | 0.743251000000000  | -0.370072000000000 | -0.103811000000000 |
| S         | 0.940067000000000  | -2.101370000000000 | 0.117114000000000  |
| N         | -0.608331000000000 | -0.077115000000000 | -0.215527000000000 |
| C         | -0.806017000000000 | -2.337993000000000 | 0.190611000000000  |
| C         | -1.466805000000000 | -1.163761000000000 | 0.018433000000000  |
| C         | -1.113637000000000 | 1.270207000000000  | -0.333078000000000 |
| C         | -1.349022000000000 | -3.722761000000000 | 0.414408000000000  |
| C         | -2.953557000000000 | -0.943658000000000 | 0.140851000000000  |
| C         | -1.443139000000000 | 1.788078000000000  | -1.599583000000000 |
| C         | -1.303749000000000 | 1.994828000000000  | 0.855957000000000  |
| C         | -2.758298000000000 | -3.918197000000000 | -0.166714000000000 |
| H         | -1.343871000000000 | -3.965134000000000 | 1.487140000000000  |
| H         | -0.664814000000000 | -4.438473000000000 | -0.057037000000000 |
| C         | -3.600836000000000 | -1.872294000000000 | 1.182224000000000  |
| H         | -3.120849000000000 | 0.097022000000000  | 0.426821000000000  |
| H         | -3.443321000000000 | -1.066442000000000 | -0.832142000000000 |

|   |                     |                     |                     |
|---|---------------------|---------------------|---------------------|
| C | -1.9830360000000000 | 3.0797450000000000  | -1.6344490000000000 |
| C | -1.2342540000000000 | 1.0744760000000000  | -2.9343530000000000 |
| C | -1.8434140000000000 | 3.2823430000000000  | 0.7631620000000000  |
| C | -0.9089940000000000 | 1.4316740000000000  | 2.2131210000000000  |
| C | -3.8829990000000000 | -3.2953010000000000 | 0.6738030000000000  |
| H | -2.7727520000000000 | -3.5019490000000000 | -1.1816000000000000 |
| H | -2.9508370000000000 | -4.9919340000000000 | -0.2723480000000000 |
| H | -2.9509860000000000 | -1.9090390000000000 | 2.0647450000000000  |
| H | -4.5439720000000000 | -1.4235220000000000 | 1.5140600000000000  |
| C | -2.1842790000000000 | 3.8222270000000000  | -0.4724380000000000 |
| H | -2.2453180000000000 | 3.5103620000000000  | -2.5969280000000000 |
| C | -2.1139910000000000 | -0.1716620000000000 | -3.1326680000000000 |
| C | 0.2360960000000000  | 0.7516660000000000  | -3.2514540000000000 |
| H | -1.5609830000000000 | 1.8006060000000000  | -3.6889890000000000 |
| H | -1.9947030000000000 | 3.8647690000000000  | 1.6670300000000000  |
| C | -2.0891500000000000 | 1.4183230000000000  | 3.1981880000000000  |
| C | 0.2912630000000000  | 2.2066600000000000  | 2.7859230000000000  |
| H | -0.5903280000000000 | 0.3950990000000000  | 2.0768260000000000  |
| H | -4.7987380000000000 | -3.2885240000000000 | 0.0689010000000000  |
| H | -4.0881280000000000 | -3.9374720000000000 | 1.5398400000000000  |
| H | -2.6047290000000000 | 4.8219780000000000  | -0.5332980000000000 |
| H | -1.7809710000000000 | -1.0066550000000000 | -2.5100840000000000 |
| H | -3.1635520000000000 | 0.0389060000000000  | -2.9022560000000000 |
| H | -2.0561060000000000 | -0.4975320000000000 | -4.1774820000000000 |
| H | 0.6078150000000000  | -0.0761000000000000 | -2.6423760000000000 |
| H | 0.3232950000000000  | 0.4589250000000000  | -4.3042880000000000 |
| H | 0.8822730000000000  | 1.6138210000000000  | -3.0705820000000000 |
| H | -2.4468040000000000 | 2.4315410000000000  | 3.4124090000000000  |
| H | -2.9315890000000000 | 0.8401670000000000  | 2.8030960000000000  |
| H | -1.7820370000000000 | 0.9656410000000000  | 4.1476090000000000  |
| H | 0.6325070000000000  | 1.7462700000000000  | 3.7201880000000000  |
| H | 1.1210050000000000  | 2.2144650000000000  | 2.0734520000000000  |
| H | 0.0188170000000000  | 3.2464260000000000  | 3.0021790000000000  |

**25**

|   |                     |                     |                     |
|---|---------------------|---------------------|---------------------|
| C | -1.3896130000000000 | -0.4845200000000000 | -0.0004680000000000 |
| H | -1.8402560000000000 | -1.4718500000000000 | -0.0029060000000000 |
| C | -2.2584420000000000 | 0.7192290000000000  | -0.0001070000000000 |
| H | -2.9054940000000000 | 0.7293990000000000  | -0.8895910000000000 |
| H | -2.9361410000000000 | 0.7069700000000000  | 0.8657220000000000  |
| H | -1.6779340000000000 | 1.6426960000000000  | 0.0205270000000000  |
| C | 0.0562810000000000  | -0.4802080000000000 | -0.0016030000000000 |
| O | 0.7460600000000000  | -1.4986710000000000 | -0.0031490000000000 |
| O | 0.5902860000000000  | 0.7682420000000000  | -0.0004520000000000 |
| C | 2.0242720000000000  | 0.8247000000000000  | -0.0006190000000000 |

|            |                    |                    |                    |
|------------|--------------------|--------------------|--------------------|
| H          | 2.428720000000000  | 0.338522000000000  | -0.892429000000000 |
| H          | 2.276054000000000  | 1.884984000000000  | 0.001597000000000  |
| H          | 2.429103000000000  | 0.334658000000000  | 0.888888000000000  |
| <b>26R</b> |                    |                    |                    |
| C          | 2.921224000000000  | 0.083434000000000  | -0.686708000000000 |
| C          | 3.274264000000000  | -0.801016000000000 | 0.339881000000000  |
| C          | 4.286544000000000  | -0.473090000000000 | 1.243832000000000  |
| C          | 4.961718000000000  | 0.744254000000000  | 1.132755000000000  |
| C          | 4.598643000000000  | 1.640737000000000  | 0.125194000000000  |
| C          | 3.577930000000000  | 1.313296000000000  | -0.768977000000000 |
| H          | 2.774038000000000  | -1.759379000000000 | 0.434123000000000  |
| H          | 4.545548000000000  | -1.169987000000000 | 2.036605000000000  |
| H          | 5.753087000000000  | 0.996603000000000  | 1.833083000000000  |
| H          | 5.107967000000000  | 2.597268000000000  | 0.038787000000000  |
| H          | 3.263536000000000  | 1.993976000000000  | -1.552201000000000 |
| C          | 1.909596000000000  | -0.237118000000000 | -1.823533000000000 |
| O          | 1.436100000000000  | 0.818888000000000  | -2.446196000000000 |
| C          | 0.700419000000000  | -1.053187000000000 | -1.217981000000000 |
| S          | 0.510287000000000  | -2.760344000000000 | -1.178507000000000 |
| N          | -0.427607000000000 | -0.471955000000000 | -0.775105000000000 |
| C          | -1.113394000000000 | -2.649249000000000 | -0.556340000000000 |
| C          | -1.465077000000000 | -1.346055000000000 | -0.389020000000000 |
| C          | -0.616232000000000 | 0.966989000000000  | -0.639528000000000 |
| C          | -1.929056000000000 | -3.894958000000000 | -0.331681000000000 |
| C          | -2.778712000000000 | -0.820799000000000 | 0.122494000000000  |
| C          | -1.275229000000000 | 1.686471000000000  | -1.652566000000000 |
| C          | -0.221600000000000 | 1.543722000000000  | 0.583349000000000  |
| C          | -3.426430000000000 | -3.676021000000000 | -0.608340000000000 |
| H          | -1.779401000000000 | -4.261115000000000 | 0.692897000000000  |
| H          | -1.546615000000000 | -4.679794000000000 | -0.992896000000000 |
| C          | -3.433502000000000 | -1.765362000000000 | 1.145460000000000  |
| H          | -2.616105000000000 | 0.161725000000000  | 0.568823000000000  |
| H          | -3.462519000000000 | -0.654376000000000 | -0.718090000000000 |
| C          | -1.472077000000000 | 3.053531000000000  | -1.415835000000000 |
| C          | -1.815316000000000 | 1.177584000000000  | -2.996793000000000 |
| C          | -0.466714000000000 | 2.909735000000000  | 0.764730000000000  |
| C          | 0.399490000000000  | 0.742866000000000  | 1.723268000000000  |
| C          | -4.177247000000000 | -2.958431000000000 | 0.524400000000000  |
| H          | -3.524910000000000 | -3.112497000000000 | -1.544183000000000 |
| H          | -3.897940000000000 | -4.648997000000000 | -0.784986000000000 |
| H          | -2.660910000000000 | -2.124540000000000 | 1.835816000000000  |
| H          | -4.139577000000000 | -1.186679000000000 | 1.750682000000000  |
| C          | -1.076984000000000 | 3.664097000000000  | -0.230396000000000 |
| H          | -1.945941000000000 | 3.649973000000000  | -2.190584000000000 |

|   |                    |                    |                    |
|---|--------------------|--------------------|--------------------|
| C | -3.356902000000000 | 1.236799000000000  | -3.014728000000000 |
| C | -1.332425000000000 | -0.173735000000000 | -3.535085000000000 |
| H | -1.468465000000000 | 1.927078000000000  | -3.720947000000000 |
| H | -0.176444000000000 | 3.383286000000000  | 1.696241000000000  |
| C | -0.646128000000000 | 0.412203000000000  | 2.805216000000000  |
| C | 1.592097000000000  | 1.469912000000000  | 2.362577000000000  |
| H | 0.776192000000000  | -0.200646000000000 | 1.322287000000000  |
| H | -5.144976000000000 | -2.618685000000000 | 0.134583000000000  |
| H | -4.398702000000000 | -3.676023000000000 | 1.324252000000000  |
| H | -1.249103000000000 | 4.726245000000000  | -0.082274000000000 |
| H | -3.789703000000000 | 0.484931000000000  | -2.347134000000000 |
| H | -3.734845000000000 | 2.215785000000000  | -2.705105000000000 |
| H | -3.724927000000000 | 1.032997000000000  | -4.026451000000000 |
| H | -1.724588000000000 | -1.021298000000000 | -2.963379000000000 |
| H | -1.696219000000000 | -0.286943000000000 | -4.562820000000000 |
| H | -0.241957000000000 | -0.199198000000000 | -3.535970000000000 |
| H | -1.076634000000000 | 1.330965000000000  | 3.219994000000000  |
| H | -1.465228000000000 | -0.198332000000000 | 2.418796000000000  |
| H | -0.174394000000000 | -0.141363000000000 | 3.624976000000000  |
| H | 2.101426000000000  | 0.798293000000000  | 3.060544000000000  |
| H | 2.314883000000000  | 1.787404000000000  | 1.609386000000000  |
| H | 1.267924000000000  | 2.349780000000000  | 2.929609000000000  |
| C | 2.697860000000000  | -1.219636000000000 | -2.899433000000000 |
| H | 1.920875000000000  | -1.806685000000000 | -3.399157000000000 |
| C | 3.392436000000000  | -0.331264000000000 | -3.928484000000000 |
| H | 3.865487000000000  | -0.939457000000000 | -4.707221000000000 |
| H | 2.649327000000000  | 0.328691000000000  | -4.374830000000000 |
| H | 4.163844000000000  | 0.285284000000000  | -3.459914000000000 |
| C | 3.633326000000000  | -2.207792000000000 | -2.256287000000000 |
| O | 3.295984000000000  | -3.277351000000000 | -1.766221000000000 |
| O | 4.911487000000000  | -1.784143000000000 | -2.227375000000000 |
| C | 5.833200000000000  | -2.616845000000000 | -1.505388000000000 |
| H | 5.852284000000000  | -3.625742000000000 | -1.923709000000000 |
| H | 6.805935000000000  | -2.138143000000000 | -1.615757000000000 |
| H | 5.548879000000000  | -2.661683000000000 | -0.451374000000000 |

**26S**

|   |                   |                    |                    |
|---|-------------------|--------------------|--------------------|
| C | 3.037959000000000 | 0.381180000000000  | 0.097032000000000  |
| C | 3.320847000000000 | -0.987216000000000 | 0.020555000000000  |
| C | 4.333400000000000 | -1.463484000000000 | -0.818156000000000 |
| C | 5.088624000000000 | -0.576911000000000 | -1.585528000000000 |
| C | 4.814535000000000 | 0.791477000000000  | -1.514795000000000 |
| C | 3.794544000000000 | 1.259130000000000  | -0.688284000000000 |
| H | 2.763577000000000 | -1.704842000000000 | 0.610755000000000  |
| H | 4.526074000000000 | -2.531855000000000 | -0.869760000000000 |

|   |                    |                    |                    |
|---|--------------------|--------------------|--------------------|
| H | 5.876634000000000  | -0.947509000000000 | -2.235199000000000 |
| H | 5.391523000000000  | 1.493692000000000  | -2.111193000000000 |
| H | 3.540637000000000  | 2.311715000000000  | -0.641371000000000 |
| C | 1.982700000000000  | 1.064488000000000  | 1.028861000000000  |
| O | 1.547663000000000  | 2.212086000000000  | 0.563041000000000  |
| C | 0.765129000000000  | 0.092963000000000  | 1.247084000000000  |
| S | 0.707253000000000  | -1.343881000000000 | 2.193049000000000  |
| N | -0.445971000000000 | 0.320790000000000  | 0.716894000000000  |
| C | -0.970826000000000 | -1.620362000000000 | 1.824646000000000  |
| C | -1.449493000000000 | -0.625044000000000 | 1.031824000000000  |
| C | -0.859219000000000 | 1.500064000000000  | -0.041714000000000 |
| C | -1.664573000000000 | -2.856117000000000 | 2.334277000000000  |
| C | -2.859298000000000 | -0.462813000000000 | 0.526207000000000  |
| C | -0.928701000000000 | 1.445414000000000  | -1.440332000000000 |
| C | -1.425075000000000 | 2.545734000000000  | 0.713934000000000  |
| C | -2.701350000000000 | -3.394841000000000 | 1.333552000000000  |
| H | -2.137597000000000 | -2.650662000000000 | 3.303714000000000  |
| H | -0.905463000000000 | -3.622322000000000 | 2.523155000000000  |
| C | -3.903662000000000 | -1.101839000000000 | 1.456128000000000  |
| H | -3.074019000000000 | 0.602220000000000  | 0.427758000000000  |
| H | -2.944813000000000 | -0.876270000000000 | -0.487923000000000 |
| C | -1.567860000000000 | 2.521073000000000  | -2.079664000000000 |
| C | -0.296665000000000 | 0.409762000000000  | -2.372758000000000 |
| C | -2.035189000000000 | 3.592638000000000  | 0.023086000000000  |
| C | -1.371921000000000 | 2.576239000000000  | 2.234729000000000  |
| C | -4.033125000000000 | -2.627751000000000 | 1.341499000000000  |
| H | -2.256139000000000 | -3.371357000000000 | 0.331369000000000  |
| H | -2.895903000000000 | -4.449221000000000 | 1.558471000000000  |
| H | -3.664607000000000 | -0.821002000000000 | 2.489210000000000  |
| H | -4.877618000000000 | -0.651070000000000 | 1.236408000000000  |
| C | -2.113679000000000 | 3.581994000000000  | -1.368989000000000 |
| H | -1.632434000000000 | 2.510768000000000  | -3.164565000000000 |
| C | -0.063184000000000 | -1.018770000000000 | -1.861885000000000 |
| C | 1.021454000000000  | 0.996220000000000  | -2.917663000000000 |
| H | -0.993247000000000 | 0.322417000000000  | -3.216793000000000 |
| H | -2.464169000000000 | 4.419448000000000  | 0.580890000000000  |
| C | -2.776012000000000 | 2.641189000000000  | 2.857764000000000  |
| C | -0.483331000000000 | 3.736057000000000  | 2.712744000000000  |
| H | -0.904554000000000 | 1.653390000000000  | 2.587592000000000  |
| H | -4.582946000000000 | -2.877723000000000 | 0.425480000000000  |
| H | -4.648543000000000 | -2.979432000000000 | 2.179055000000000  |
| H | -2.606346000000000 | 4.394779000000000  | -1.894595000000000 |
| H | 0.747028000000000  | -1.074002000000000 | -1.131506000000000 |
| H | -0.961491000000000 | -1.463437000000000 | -1.426065000000000 |



|            |                     |                     |                     |
|------------|---------------------|---------------------|---------------------|
| H          | 0.2310660000000000  | -1.6433900000000000 | -2.7123720000000000 |
| H          | 1.6911660000000000  | 1.2322550000000000  | -2.0893200000000000 |
| H          | 1.5191930000000000  | 0.2791060000000000  | -3.5809850000000000 |
| H          | 0.8383500000000000  | 1.9169190000000000  | -3.4816000000000000 |
| H          | -3.2985650000000000 | 3.5607930000000000  | 2.5719100000000000  |
| H          | -3.3952460000000000 | 1.7928060000000000  | 2.5466610000000000  |
| H          | -2.7036390000000000 | 2.6246720000000000  | 3.9510290000000000  |
| H          | -0.3692100000000000 | 3.7065590000000000  | 3.8028670000000000  |
| H          | 0.4970970000000000  | 3.6436240000000000  | 2.2403550000000000  |
| H          | -0.9198010000000000 | 4.7058190000000000  | 2.4455790000000000  |
| C          | 2.7132460000000000  | 1.2661450000000000  | 2.5075930000000000  |
| H          | 1.9092620000000000  | 1.2572940000000000  | 3.2499720000000000  |
| C          | 3.4085350000000000  | 2.6243960000000000  | 2.5207890000000000  |
| H          | 4.2091140000000000  | 2.6636210000000000  | 1.7783230000000000  |
| H          | 2.6816420000000000  | 3.3999580000000000  | 2.2833300000000000  |
| H          | 3.8461580000000000  | 2.8214290000000000  | 3.5057560000000000  |
| C          | 3.6400340000000000  | 0.1346080000000000  | 2.8579950000000000  |
| O          | 3.2906250000000000  | -0.9391330000000000 | 3.3306190000000000  |
| O          | 4.9262980000000000  | 0.3896990000000000  | 2.5506070000000000  |
| C          | 5.8385430000000000  | -0.7088610000000000 | 2.7097800000000000  |
| H          | 5.5580100000000000  | -1.5257970000000000 | 2.0405180000000000  |
| H          | 6.8181360000000000  | -0.3153920000000000 | 2.4393850000000000  |
| H          | 5.8397120000000000  | -1.0648900000000000 | 3.7425320000000000  |
| <b>TSI</b> |                     |                     |                     |
| C          | -0.5069100000000000 | 1.3316360000000000  | 0.2380000000000000  |
| C          | -1.8135610000000000 | 0.9418130000000000  | -0.0178950000000000 |
| C          | -2.1642120000000000 | -0.4164340000000000 | -0.1355220000000000 |
| C          | -1.1347110000000000 | -1.3481370000000000 | 0.0942590000000000  |
| C          | 0.1607150000000000  | -0.9302290000000000 | 0.3524280000000000  |
| N          | 0.5132060000000000  | 0.4029270000000000  | 0.3387050000000000  |
| H          | -2.5927530000000000 | 1.6941830000000000  | -0.0392150000000000 |
| H          | -1.3525440000000000 | -2.4096880000000000 | 0.1124160000000000  |
| C          | 1.2284040000000000  | -1.8924750000000000 | 0.6888950000000000  |
| C          | 2.2055670000000000  | -1.5481820000000000 | 1.6367180000000000  |
| C          | 1.2733950000000000  | -3.1685430000000000 | 0.1039120000000000  |
| C          | 3.1929090000000000  | -2.4616720000000000 | 1.9996410000000000  |
| H          | 2.1764800000000000  | -0.5619090000000000 | 2.0858120000000000  |
| C          | 2.2673920000000000  | -4.0772260000000000 | 0.4607340000000000  |
| H          | 0.5409590000000000  | -3.4395060000000000 | -0.6506060000000000 |
| C          | 3.2291170000000000  | -3.7290050000000000 | 1.4125380000000000  |
| H          | 3.9348460000000000  | -2.1846630000000000 | 2.7433000000000000  |
| H          | 2.2953360000000000  | -5.0560540000000000 | -0.0092050000000000 |
| H          | 4.0028670000000000  | -4.4382280000000000 | 1.6914720000000000  |
| C          | -0.1332790000000000 | 2.7451730000000000  | 0.4457080000000000  |

|   |                     |                     |                     |
|---|---------------------|---------------------|---------------------|
| C | 1.0460800000000000  | 3.0673170000000000  | 1.1427460000000000  |
| C | -0.9302560000000000 | 3.7974930000000000  | -0.0413140000000000 |
| C | 1.4025840000000000  | 4.3961440000000000  | 1.3615040000000000  |
| H | 1.6839700000000000  | 2.2648540000000000  | 1.4937590000000000  |
| C | -0.5733210000000000 | 5.1246040000000000  | 0.1831520000000000  |
| H | -1.8229530000000000 | 3.5801060000000000  | -0.6186280000000000 |
| C | 0.5931470000000000  | 5.4315720000000000  | 0.8890580000000000  |
| H | 2.3156960000000000  | 4.6232910000000000  | 1.9045810000000000  |
| H | -1.2015980000000000 | 5.9214050000000000  | -0.2044200000000000 |
| H | 0.8719730000000000  | 6.4672090000000000  | 1.0602130000000000  |
| C | -3.5480320000000000 | -0.8325250000000000 | -0.4219300000000000 |
| C | -4.3987510000000000 | -0.0129500000000000 | -1.1875310000000000 |
| C | -4.0594520000000000 | -2.0532850000000000 | 0.0571930000000000  |
| C | -5.7094950000000000 | -0.3977950000000000 | -1.4609290000000000 |
| H | -4.0203890000000000 | 0.9201230000000000  | -1.5936360000000000 |
| C | -5.3696900000000000 | -2.4374510000000000 | -0.2179240000000000 |
| H | -3.4363400000000000 | -2.6938810000000000 | 0.6733220000000000  |
| C | -6.2025480000000000 | -1.6122700000000000 | -0.9781240000000000 |
| H | -6.3442780000000000 | 0.2485460000000000  | -2.0603850000000000 |
| H | -5.7444100000000000 | -3.3802680000000000 | 0.1703450000000000  |
| H | -7.2239140000000000 | -1.9128970000000000 | -1.1921200000000000 |
| C | 1.7522180000000000  | 0.7545510000000000  | -1.1036000000000000 |
| H | 1.6083370000000000  | 1.8286350000000000  | -1.0867960000000000 |
| C | 1.1735180000000000  | 0.0436600000000000  | -2.2914220000000000 |
| H | 1.2153870000000000  | -1.0415550000000000 | -2.1720990000000000 |
| H | 0.1322170000000000  | 0.3455760000000000  | -2.4421180000000000 |
| H | 1.7338990000000000  | 0.2993070000000000  | -3.2003330000000000 |
| C | 3.1043610000000000  | 0.4143340000000000  | -0.6206280000000000 |
| O | 3.7252280000000000  | 1.0657000000000000  | 0.2104210000000000  |
| O | 3.6038950000000000  | -0.6978190000000000 | -1.2082050000000000 |
| C | 4.9207770000000000  | -1.0837740000000000 | -0.7881840000000000 |
| H | 5.1467410000000000  | -1.9975240000000000 | -1.3374570000000000 |
| H | 5.6446840000000000  | -0.3015040000000000 | -1.0319820000000000 |
| H | 4.9346940000000000  | -1.2738640000000000 | 0.2862850000000000  |

**TSIR**

|   |            |             |             |
|---|------------|-------------|-------------|
| C | 3.45096500 | 0.84750600  | -0.02755600 |
| C | 3.80382900 | 0.16293300  | 1.14461900  |
| C | 5.14568200 | 0.00007200  | 1.49323600  |
| C | 6.15060800 | 0.52131500  | 0.67694400  |
| C | 5.80665500 | 1.22267100  | -0.48406500 |
| C | 4.46806500 | 1.39145500  | -0.82707200 |
| H | 3.03075500 | -0.21828700 | 1.80437400  |
| H | 5.40374700 | -0.52553400 | 2.40809500  |
| H | 7.19476400 | 0.39081100  | 0.94602100  |

|   |             |             |             |
|---|-------------|-------------|-------------|
| H | 6.58441600  | 1.63621400  | -1.11992000 |
| H | 4.18840200  | 1.93718700  | -1.72210400 |
| C | 2.03553600  | 1.05701800  | -0.46141800 |
| O | 1.70460800  | 2.14303100  | -1.00676000 |
| C | 1.11484400  | -0.02284300 | -0.31768000 |
| S | 1.54843000  | -1.68785900 | 0.01308900  |
| N | -0.23242000 | 0.05412400  | -0.64563500 |
| C | -0.05318900 | -2.24058600 | -0.46956300 |
| C | -0.87318600 | -1.19202300 | -0.74362200 |
| C | -0.97960900 | 1.27617600  | -0.44079700 |
| C | -0.31234200 | -3.71884700 | -0.57840000 |
| C | -2.33976300 | -1.25361600 | -1.07360800 |
| C | -1.44145700 | 2.00952000  | -1.54537800 |
| C | -1.24992600 | 1.65950500  | 0.88564000  |
| C | -1.39123800 | -4.05581800 | -1.61995000 |
| H | -0.58057100 | -4.13991100 | 0.40115900  |
| H | 0.62540100  | -4.19883600 | -0.87858500 |
| C | -3.04744400 | -2.45612800 | -0.42941800 |
| H | -2.80398400 | -0.32902800 | -0.71945600 |
| H | -2.48111300 | -1.26406100 | -2.16274400 |
| C | -2.17370900 | 3.17413800  | -1.29227900 |
| C | -1.15188100 | 1.59198700  | -2.97643000 |
| C | -1.97315400 | 2.84063200  | 1.08811200  |
| C | -0.79409700 | 0.83644800  | 2.08206500  |
| C | -2.83220000 | -3.79158200 | -1.15865600 |
| H | -1.17666500 | -3.48151400 | -2.52990000 |
| H | -1.29739300 | -5.11254400 | -1.89546900 |
| H | -2.70705500 | -2.53562600 | 0.61024600  |
| H | -4.12252800 | -2.24865300 | -0.38589800 |
| C | -2.43111200 | 3.59395800  | 0.01057000  |
| H | -2.53878200 | 3.76423100  | -2.12748300 |
| C | -0.24728700 | 2.62431100  | -3.67060900 |
| C | -2.44433500 | 1.36878600  | -3.77962100 |
| H | -0.60963300 | 0.64332800  | -2.94221500 |
| H | -2.18796100 | 3.16682100  | 2.10131700  |
| C | -1.97809300 | 0.44356800  | 2.98096700  |
| C | 0.29547300  | 1.57645200  | 2.87648900  |
| H | -0.35502500 | -0.09403000 | 1.71617700  |
| H | -3.48727100 | -3.83343400 | -2.03839400 |
| H | -3.15523000 | -4.60250400 | -0.49336200 |
| H | -2.99481400 | 4.50583300  | 0.18598800  |
| H | -0.74825500 | 3.59689000  | -3.74182100 |
| H | 0.68061900  | 2.75078400  | -3.10806800 |
| H | -0.00665900 | 2.29813000  | -4.68890900 |

|   |             |             |             |
|---|-------------|-------------|-------------|
| H | -3.00662700 | 2.30221900  | -3.89614000 |
| H | -2.20511900 | 0.99730500  | -4.78252600 |
| H | -3.10194100 | 0.64118400  | -3.29346200 |
| H | -2.45840400 | 1.32128300  | 3.42720200  |
| H | -2.73682100 | -0.10451300 | 2.41137100  |
| H | -1.63274300 | -0.19954300 | 3.79821200  |
| H | 0.65516900  | 0.95357000  | 3.70340600  |
| H | 1.14829000  | 1.82263500  | 2.23571900  |
| H | -0.09094800 | 2.51073000  | 3.30000800  |
| C | 1.70118800  | -1.62477100 | -3.65935900 |
| H | 0.80345100  | -2.17294400 | -3.92265600 |
| C | 1.86823400  | -0.19802900 | -4.03959400 |
| H | 1.12347500  | 0.10422300  | -4.77930700 |
| H | 1.76225800  | 0.46308600  | -3.16726100 |
| H | 2.87076600  | -0.00991600 | -4.44243500 |
| C | 2.68978500  | -2.37485400 | -2.91793300 |
| O | 2.59258100  | -3.56849100 | -2.63432400 |
| O | 3.75066700  | -1.61175000 | -2.55788100 |
| C | 4.75036300  | -2.25791200 | -1.75831700 |
| H | 5.23987400  | -3.05443700 | -2.32587100 |
| H | 5.46104200  | -1.47589900 | -1.49502000 |
| H | 4.30125400  | -2.67816800 | -0.85580600 |

**TSIIS**

|   |             |             |             |
|---|-------------|-------------|-------------|
| C | 2.43123900  | 1.83664300  | -0.33241300 |
| C | 2.70866800  | 1.85831200  | -1.70707400 |
| C | 3.99659200  | 2.14093400  | -2.16543400 |
| C | 5.02164600  | 2.40791200  | -1.25663100 |
| C | 4.74887200  | 2.40750400  | 0.11585400  |
| C | 3.46245700  | 2.13337000  | 0.57195800  |
| H | 1.91270300  | 1.68452100  | -2.42437000 |
| H | 4.19495400  | 2.16203700  | -3.23316300 |
| H | 6.02467000  | 2.62355800  | -1.61322300 |
| H | 5.54131700  | 2.62092400  | 0.82770600  |
| H | 3.23709400  | 2.13512400  | 1.63329300  |
| C | 1.07629500  | 1.54217700  | 0.22763100  |
| O | 0.67213200  | 2.16944000  | 1.24254600  |
| C | 0.31317400  | 0.49183600  | -0.36275200 |
| S | 0.93648400  | -0.71014800 | -1.47494300 |
| N | -0.96961500 | 0.13950300  | 0.03577400  |
| C | -0.48442800 | -1.72390500 | -1.23728800 |
| C | -1.40135600 | -1.10737800 | -0.44635300 |
| C | -1.90897200 | 1.13924800  | 0.49486500  |
| C | -0.50808500 | -3.10015600 | -1.84530700 |
| C | -2.78115200 | -1.60218600 | -0.10706400 |

|   |             |             |             |
|---|-------------|-------------|-------------|
| C | -2.30381100 | 1.16330400  | 1.84184800  |
| C | -2.42646900 | 2.03427700  | -0.45935000 |
| C | -1.36429200 | -4.08897700 | -1.03811400 |
| H | -0.85234500 | -3.05831800 | -2.88861600 |
| H | 0.52272800  | -3.46965100 | -1.87176500 |
| C | -3.38985400 | -2.48038900 | -1.21167500 |
| H | -3.42153900 | -0.73095100 | 0.05598500  |
| H | -2.76284200 | -2.14539700 | 0.84735800  |
| C | -3.22905500 | 2.13769200  | 2.23063000  |
| C | -1.74392600 | 0.19574200  | 2.86968300  |
| C | -3.33780400 | 3.00103000  | -0.01909000 |
| C | -2.03404000 | 1.97613500  | -1.92867000 |
| C | -2.87970700 | -3.92990800 | -1.23137700 |
| H | -1.10653600 | -3.97502700 | 0.02227300  |
| H | -1.07884100 | -5.11041600 | -1.31480300 |
| H | -3.19380700 | -1.99895700 | -2.17752900 |
| H | -4.47877800 | -2.49271200 | -1.08984200 |
| C | -3.73649200 | 3.05523700  | 1.31380300  |
| H | -3.54840800 | 2.18358800  | 3.26740700  |
| C | -0.90330600 | 0.94551000  | 3.91715300  |
| C | -2.85299800 | -0.62864900 | 3.54442500  |
| H | -1.08140800 | -0.49853400 | 2.34597400  |
| H | -3.74617500 | 3.71192300  | -0.73111400 |
| C | -3.26519000 | 1.82601200  | -2.83737000 |
| C | -1.18993300 | 3.20081500  | -2.32066700 |
| H | -1.41581600 | 1.09007400  | -2.08774100 |
| H | -3.38803400 | -4.50327000 | -0.44544600 |
| H | -3.17403600 | -4.38476800 | -2.18585100 |
| H | -4.44813500 | 3.80942900  | 1.63753600  |
| H | -1.52415500 | 1.64798200  | 4.48555900  |
| H | -0.10362800 | 1.50557400  | 3.42682500  |
| H | -0.46138500 | 0.23940500  | 4.62946500  |
| H | -3.52101000 | 0.00961000  | 4.13382500  |
| H | -2.41273100 | -1.36666800 | 4.22452100  |
| H | -3.46358600 | -1.16265400 | 2.80934500  |
| H | -3.92698800 | 2.69660000  | -2.77230400 |
| H | -3.84636600 | 0.93791100  | -2.56536500 |
| H | -2.95123100 | 1.72287900  | -3.88212800 |
| H | -0.86555100 | 3.12344200  | -3.36467000 |
| H | -0.29934500 | 3.28059800  | -1.68909600 |
| H | -1.76581700 | 4.12730300  | -2.21302600 |
| C | 1.63594200  | -2.33783100 | 1.73164400  |
| H | 0.87696800  | -3.11200700 | 1.75204300  |
| C | 1.64107600  | -1.24230900 | 2.73543200  |

|   |            |             |             |
|---|------------|-------------|-------------|
| H | 0.98605300 | -1.47441300 | 3.57828300  |
| H | 1.29661900 | -0.29566700 | 2.29430200  |
| H | 2.65413700 | -1.05149300 | 3.10912000  |
| C | 2.60413300 | -2.44639900 | 0.66319700  |
| O | 2.64286000 | -3.36618000 | -0.15345300 |
| O | 3.47623100 | -1.40885200 | 0.65333800  |
| C | 4.42694800 | -1.39378800 | -0.41996500 |
| H | 5.10460300 | -2.24889700 | -0.34463400 |
| H | 4.97088100 | -0.45652100 | -0.31239400 |
| H | 3.91234400 | -1.42194100 | -1.38299600 |

**TSIHR**

|   |                     |                     |                     |
|---|---------------------|---------------------|---------------------|
| C | 3.0478030000000000  | 0.3660350000000000  | -0.7049320000000000 |
| C | 3.3626150000000000  | -0.5127700000000000 | 0.3397830000000000  |
| C | 4.2920330000000000  | -0.1545990000000000 | 1.3151010000000000  |
| C | 4.9180420000000000  | 1.0939830000000000  | 1.2671350000000000  |
| C | 4.5892970000000000  | 1.9875990000000000  | 0.2470680000000000  |
| C | 3.6574650000000000  | 1.6245230000000000  | -0.7280390000000000 |
| H | 2.8816130000000000  | -1.4829430000000000 | 0.3925410000000000  |
| H | 4.5223230000000000  | -0.8491750000000000 | 2.1183780000000000  |
| H | 5.6433310000000000  | 1.3713700000000000  | 2.0268630000000000  |
| H | 5.0589120000000000  | 2.9669060000000000  | 0.2076270000000000  |
| H | 3.3919640000000000  | 2.3059690000000000  | -1.5289640000000000 |
| C | 2.1627500000000000  | 0.0123670000000000  | -1.9011010000000000 |
| O | 1.6410090000000000  | 0.9593940000000000  | -2.5432300000000000 |
| C | 0.6461220000000000  | -0.9875600000000000 | -1.0302280000000000 |
| S | 0.3244190000000000  | -2.6743040000000000 | -0.9623110000000000 |
| N | -0.4837330000000000 | -0.3416510000000000 | -0.7069030000000000 |
| C | -1.3455510000000000 | -2.4520490000000000 | -0.4820860000000000 |
| C | -1.6194150000000000 | -1.1249860000000000 | -0.3835090000000000 |
| C | -0.5491450000000000 | 1.1082300000000000  | -0.6320370000000000 |
| C | -2.2652770000000000 | -3.6281260000000000 | -0.2876540000000000 |
| C | -2.9205890000000000 | -0.4842690000000000 | 0.0156260000000000  |
| C | -1.0706440000000000 | 1.8466680000000000  | -1.7075910000000000 |
| C | -0.1086350000000000 | 1.7041500000000000  | 0.5681730000000000  |
| C | -3.7172090000000000 | -3.3132680000000000 | -0.6875960000000000 |
| H | -2.2237030000000000 | -3.9719390000000000 | 0.7550600000000000  |
| H | -1.8929380000000000 | -4.4603010000000000 | -0.8949130000000000 |
| C | -3.7243960000000000 | -1.3448940000000000 | 1.0054900000000000  |
| H | -2.7099980000000000 | 0.4934320000000000  | 0.4556620000000000  |
| H | -3.5282580000000000 | -0.2840400000000000 | -0.8747950000000000 |
| C | -1.1286910000000000 | 3.2387180000000000  | -1.5418030000000000 |
| C | -1.5840130000000000 | 1.3356980000000000  | -3.0609320000000000 |
| C | -0.2077380000000000 | 3.0944040000000000  | 0.6769310000000000  |
| C | 0.4231840000000000  | 0.8871400000000000  | 1.7416640000000000  |

|              |                    |                    |                    |
|--------------|--------------------|--------------------|--------------------|
| C            | -4.500197000000000 | -2.503557000000000 | 0.358550000000000  |
| H            | -3.700641000000000 | -2.776857000000000 | -1.644339000000000 |
| H            | -4.246390000000000 | -4.254859000000000 | -0.872705000000000 |
| H            | -3.039214000000000 | -1.735552000000000 | 1.767421000000000  |
| H            | -4.433876000000000 | -0.698949000000000 | 1.534253000000000  |
| C            | -0.711177000000000 | 3.858950000000000  | -0.371437000000000 |
| H            | -1.502419000000000 | 3.843798000000000  | -2.363292000000000 |
| C            | -3.109074000000000 | 1.538501000000000  | -3.174696000000000 |
| C            | -1.201149000000000 | -0.075090000000000 | -3.522829000000000 |
| H            | -1.127150000000000 | 2.018970000000000  | -3.789228000000000 |
| H            | 0.118329000000000  | 3.584271000000000  | 1.587290000000000  |
| C            | -0.707799000000000 | 0.493093000000000  | 2.710142000000000  |
| C            | 1.535230000000000  | 1.614289000000000  | 2.510364000000000  |
| H            | 0.859152000000000  | -0.032279000000000 | 1.344322000000000  |
| H            | -5.406363000000000 | -2.109963000000000 | -0.119261000000000 |
| H            | -4.837871000000000 | -3.175292000000000 | 1.157884000000000  |
| H            | -0.770523000000000 | 4.939542000000000  | -0.277612000000000 |
| H            | -3.651175000000000 | 0.860854000000000  | -2.507910000000000 |
| H            | -3.405602000000000 | 2.561523000000000  | -2.924012000000000 |
| H            | -3.437123000000000 | 1.329576000000000  | -4.199091000000000 |
| H            | -1.686065000000000 | -0.861419000000000 | -2.936853000000000 |
| H            | -1.530833000000000 | -0.198198000000000 | -4.560994000000000 |
| H            | -0.119191000000000 | -0.203907000000000 | -3.484919000000000 |
| H            | -1.219651000000000 | 1.384858000000000  | 3.090442000000000  |
| H            | -1.452424000000000 | -0.148802000000000 | 2.235077000000000  |
| H            | -0.295261000000000 | -0.053153000000000 | 3.566052000000000  |
| H            | 2.009936000000000  | 0.920231000000000  | 3.211075000000000  |
| H            | 2.305730000000000  | 1.992400000000000  | 1.835499000000000  |
| H            | 1.140520000000000  | 2.452090000000000  | 3.096556000000000  |
| C            | 2.775267000000000  | -1.130311000000000 | -2.836718000000000 |
| H            | 1.927521000000000  | -1.656085000000000 | -3.282715000000000 |
| C            | 3.581023000000000  | -0.438391000000000 | -3.944478000000000 |
| H            | 4.001546000000000  | -1.173004000000000 | -4.638783000000000 |
| H            | 2.918588000000000  | 0.235557000000000  | -4.489494000000000 |
| H            | 4.404410000000000  | 0.146785000000000  | -3.525643000000000 |
| C            | 3.584120000000000  | -2.169903000000000 | -2.101312000000000 |
| O            | 3.127389000000000  | -3.181447000000000 | -1.591210000000000 |
| O            | 4.891552000000000  | -1.858614000000000 | -2.031910000000000 |
| C            | 5.707936000000000  | -2.742049000000000 | -1.244775000000000 |
| H            | 5.639214000000000  | -3.765799000000000 | -1.618861000000000 |
| H            | 6.725050000000000  | -2.364183000000000 | -1.343418000000000 |
| H            | 5.390314000000000  | -2.711385000000000 | -0.199579000000000 |
| <b>TSIHS</b> |                    |                    |                    |
| C            | 3.157917000000000  | 0.633501000000000  | -0.247116000000000 |

|   |                    |                    |                    |
|---|--------------------|--------------------|--------------------|
| C | 3.559829000000000  | -0.706315000000000 | -0.191634000000000 |
| C | 4.468885000000000  | -1.221664000000000 | -1.115279000000000 |
| C | 5.003550000000000  | -0.399823000000000 | -2.110382000000000 |
| C | 4.618701000000000  | 0.940336000000000  | -2.169891000000000 |
| C | 3.703793000000000  | 1.447259000000000  | -1.246015000000000 |
| H | 3.167688000000000  | -1.369264000000000 | 0.570489000000000  |
| H | 4.757722000000000  | -2.267553000000000 | -1.056879000000000 |
| H | 5.711547000000000  | -0.801183000000000 | -2.830075000000000 |
| H | 5.028164000000000  | 1.591750000000000  | -2.937543000000000 |
| H | 3.385080000000000  | 2.482588000000000  | -1.286927000000000 |
| C | 2.208159000000000  | 1.321209000000000  | 0.745272000000000  |
| O | 1.674130000000000  | 2.399142000000000  | 0.370737000000000  |
| C | 0.741960000000000  | 0.004506000000000  | 0.972818000000000  |
| S | 0.768674000000000  | -1.588224000000000 | 1.606804000000000  |
| N | -0.542436000000000 | 0.339941000000000  | 0.764909000000000  |
| C | -0.968614000000000 | -1.761255000000000 | 1.591692000000000  |
| C | -1.531880000000000 | -0.614045000000000 | 1.128956000000000  |
| C | -0.989948000000000 | 1.633482000000000  | 0.261866000000000  |
| C | -1.628513000000000 | -3.040701000000000 | 2.032427000000000  |
| C | -3.001476000000000 | -0.296615000000000 | 1.036449000000000  |
| C | -1.241120000000000 | 1.799048000000000  | -1.111785000000000 |
| C | -1.282044000000000 | 2.622188000000000  | 1.215641000000000  |
| C | -2.962211000000000 | -3.298432000000000 | 1.311793000000000  |
| H | -1.779553000000000 | -3.030009000000000 | 3.120612000000000  |
| H | -0.939848000000000 | -3.868496000000000 | 1.830944000000000  |
| C | -3.820955000000000 | -0.994878000000000 | 2.135539000000000  |
| H | -3.130306000000000 | 0.784190000000000  | 1.114976000000000  |
| H | -3.389153000000000 | -0.569627000000000 | 0.048196000000000  |
| C | -1.802425000000000 | 3.021519000000000  | -1.505800000000000 |
| C | -0.926088000000000 | 0.792544000000000  | -2.218870000000000 |
| C | -1.849850000000000 | 3.818394000000000  | 0.765408000000000  |
| C | -0.988501000000000 | 2.446436000000000  | 2.698471000000000  |
| C | -4.139347000000000 | -2.471398000000000 | 1.851792000000000  |
| H | -2.820262000000000 | -3.099071000000000 | 0.242482000000000  |
| H | -3.209427000000000 | -4.362655000000000 | 1.395371000000000  |
| H | -3.279944000000000 | -0.902712000000000 | 3.085061000000000  |
| H | -4.763391000000000 | -0.451388000000000 | 2.266110000000000  |
| C | -2.111711000000000 | 4.019180000000000  | -0.585481000000000 |
| H | -2.001097000000000 | 3.186231000000000  | -2.561030000000000 |
| C | -1.743332000000000 | -0.509254000000000 | -2.175536000000000 |
| C | 0.572461000000000  | 0.490011000000000  | -2.351744000000000 |
| H | -1.223988000000000 | 1.302086000000000  | -3.143249000000000 |
| H | -2.084347000000000 | 4.599177000000000  | 1.482252000000000  |
| C | -2.274123000000000 | 2.428221000000000  | 3.542747000000000  |



|   |                     |                     |                     |
|---|---------------------|---------------------|---------------------|
| C | -0.0253000000000000 | 3.5420040000000000  | 3.1860680000000000  |
| H | -0.4871670000000000 | 1.4853930000000000  | 2.8406090000000000  |
| H | -4.9622960000000000 | -2.5315500000000000 | 1.1283410000000000  |
| H | -4.5075070000000000 | -2.9272680000000000 | 2.7796260000000000  |
| H | -2.5539550000000000 | 4.9520260000000000  | -0.9231500000000000 |
| H | -1.4527000000000000 | -1.1509530000000000 | -1.3392180000000000 |
| H | -2.8167220000000000 | -0.3063110000000000 | -2.1041980000000000 |
| H | -1.5692090000000000 | -1.0752090000000000 | -3.0976380000000000 |
| H | 0.9303140000000000  | -0.1490070000000000 | -1.5419220000000000 |
| H | 0.7631210000000000  | -0.0305200000000000 | -3.2976560000000000 |
| H | 1.1663610000000000  | 1.4052960000000000  | -2.3279020000000000 |
| H | -2.8254890000000000 | 3.3698570000000000  | 3.4413440000000000  |
| H | -2.9432180000000000 | 1.6136350000000000  | 3.2490390000000000  |
| H | -2.0268420000000000 | 2.2964570000000000  | 4.6021180000000000  |
| H | 0.3093410000000000  | 3.3289980000000000  | 4.2078420000000000  |
| H | 0.8431700000000000  | 3.5895490000000000  | 2.5264040000000000  |
| H | -0.5119770000000000 | 4.5240020000000000  | 3.1923170000000000  |
| C | 2.7975860000000000  | 1.3883730000000000  | 2.2360430000000000  |
| H | 1.9381810000000000  | 1.4644340000000000  | 2.9051890000000000  |
| C | 3.6399130000000000  | 2.6696560000000000  | 2.3292390000000000  |
| H | 4.4805080000000000  | 2.6345320000000000  | 1.6309500000000000  |
| H | 3.0171540000000000  | 3.5275650000000000  | 2.0750600000000000  |
| H | 4.0398220000000000  | 2.8013670000000000  | 3.3400340000000000  |
| C | 3.5794010000000000  | 0.1812730000000000  | 2.6947530000000000  |
| O | 3.1107720000000000  | -0.7765330000000000 | 3.2889980000000000  |
| O | 4.8864110000000000  | 0.2555440000000000  | 2.3719920000000000  |
| C | 5.6790810000000000  | -0.8987260000000000 | 2.6913800000000000  |
| H | 5.3295160000000000  | -1.7648070000000000 | 2.1233670000000000  |
| H | 6.6977950000000000  | -0.6428180000000000 | 2.4017250000000000  |
| H | 5.6263740000000000  | -1.1190990000000000 | 3.7598560000000000  |
